# Supplementary material for: Proteomic Analysis of Chicken Chorioallantoic Membrane (CAM) during Embryonic Development Provides Functional Insight
Source: Hindawi journal article supplement (doi:10.1155/2022/7813921), 2022-01-01
Supplement: f3 [file 7813921.f3.pdf]

**Table S3.** Posttranscriptional modifications (PTMs) abundance in CAM and EBS samples expressed as total spectral count and emPAI values. Detected PTMs included carboxylation of glutamic acid (E) and phosphorylation of serine and threonine (S, T) amino acids.

| PTM / Protein Name                                                              | Official gene symbol | Gene ID   | PTM total spectral count (emPAI) |            |          | General total spectral count (emPAI) |            |          |
|---------------------------------------------------------------------------------|----------------------|-----------|----------------------------------|------------|----------|--------------------------------------|------------|----------|
|                                                                                 |                      |           | CAM (ED12)                       | CAM (ED19) | EBS      | CAM (ED12)                           | CAM (ED19) | EBS      |
| <b>γ-carboxylation</b>                                                          |                      |           |                                  |            |          |                                      |            |          |
| Heat shock 70kDa protein 8<br>RMVNHFIAEFKRK                                     | HSPA8                | 395853    | 0(0)                             | 4(0.117)   | 0(0)     | 105(6.1)                             | 89(6.5)    | 61(3.0)  |
| Splicing factor 3b subunit 3<br>KQKNVAEELDRT                                    | SF3B3                | 415680    | 0(0)                             | 1(0.019)   | ND       | 15(0.2)                              | 20(0.3)    | ND       |
| Centriolar coiled-coil protein 110<br>RVQEILENIQNRK                             | CCP110               | 416613    | ND                               | ND         | 1(0.136) | ND                                   | ND         | 1(0.1)   |
| G protein subunit alpha i1<br>KIIHEAGYSEEECKQYKA                                | GNAI1                | 396368    | 1(0.069)                         | 0(0)       | ND       | 10(0.5)                              | 10(0.5)    | ND       |
| Myocardial zonula adherens protein<br>KLAQKLAERL                                | MYZAP                | 415404    | 1(0.067)                         | ND         | ND       | 1(0.1)                               | ND         | ND       |
| <b>Phospho-serine / phospho-threonine</b>                                       |                      |           |                                  |            |          |                                      |            |          |
| Ovalbumin (SERPINB14)<br>RFDKLPFGFDSIEAQCGTSVNVHSSLRD<br>REVVGSAEAGVDAASVSEEFRA | OVAL                 | 396058    | 2(0.197)                         | 12(0.209)  | 0(0)     | 400(54.2)                            | 266(32.6)  | 34(2.0)  |
| Heat shock protein 90 alpha family class A member 1<br>KTEDKPEIEDVGSDEEEKKDGDKK | HSP90AA1             | 423463    | 0(0)                             | 3(0.032)   | 0(0)     | 106(2.7)                             | 94(3.3)    | 22(1.1)  |
| Hepatoma-derived growth factor<br>RKAEDVLEDSPKRT                                | HDGF                 | 776936    | 2(0.157)                         | 0(0)       | 0(0)     | 8(0.6)                               | 10(1.1)    | 48(10.2) |
| Heterogeneous nuclear ribonucleoprotein A3<br>RRSSQGHEPKEPEQLRK                 | HNRNPA3              | 100859627 | 0(0)                             | 0(0)       | 3(0.132) | 27(0.5)                              | 16(0.4)    | 14(2.0)  |
| Fibrinogen beta chain<br>-ASVEYDNEEDSPQIDARA                                    | FGB                  | 373926    | 0(0)                             | 0(0)       | 1(0.098) | 2(0.1)                               | 10(0.4)    | 36(3.4)  |
| Calcium/calmodulin dependent protein kinase II delta<br>KESTESSNTTIEDVDKARK     | CAMK2D               | 422688    | 0(0)                             | 1(0.049)   | ND       | 11(0.2)                              | 5(0.2)     | ND       |
| COP9 signalosome subunit 4<br>KLETYLKIARL                                       | COPS4                | 422594    | 0(0)                             | 1(0.059)   | 0(0)     | 2(0.1)                               | 2(0.1)     | 9(0.6)   |
| HYDIN, axonemal central pair apparatus protein<br>KAFVTQEEEDQQLRL               | HYDIN                | 427538    | ND                               | 1(0.005)   | ND       | ND                                   | 1(0.0)     | ND       |
| Growth differentiation factor 11<br>RLESIKSQILSKL                               | GDF11                | 107049246 | ND                               | ND         | 1(0.124) | ND                                   | ND         | 1(0.1)   |

ND, protein/peptide not detected in this sample.

0, PTM peptide not detected in this sample, which however contains non-PTM peptides.

Grey highlighted residues represent the modified amino acids.
