# Supplementary material for: Proteomic Analysis of Chicken Chorioallantoic Membrane (CAM) during Embryonic Development Provides Functional Insight
Source: Hindawi journal article supplement (doi:10.1155/2022/7813921), 2022-01-01
Supplement: f4 [file 7813921.f4.pdf]

**Table S4.** List of proteins identified in this study, for CAM proteomes (ED12 and ED19) and embryonic blood serum proteome (EBS).

| No. | Protein Name                                                                       | Official gene symbol | Gene ID   | CAM (ED12) | CAM (ED19) | Embryonic blood serum |
|-----|------------------------------------------------------------------------------------|----------------------|-----------|------------|------------|-----------------------|
| 1   | 1,4-alpha-glucan branching enzyme 1                                                | GBE1                 | 427964    | NO         | YES        | NO                    |
| 2   | 1-acylglycerol-3-phosphate O-acyltransferase 2                                     | AGPAT2               | 772114    | YES        | YES        | NO                    |
| 3   | 2',3'-cyclic nucleotide 3' phosphodiesterase                                       | CNP                  | 395921    | YES        | YES        | NO                    |
| 4   | 2,4-dienoyl-CoA reductase 1, mitochondrial                                         | DECR1                | 420218    | YES        | YES        | NO                    |
| 5   | 2,4-dienoyl-CoA reductase 2, peroxisomal                                           | DECR2                | 100858408 | YES        | NO         | NO                    |
| 6   | 3-hydroxyacyl-CoA dehydratase 3                                                    | HACD3                | 415539    | YES        | YES        | NO                    |
| 7   | 3-hydroxybutyrate dehydrogenase, type 1 A                                          | BDH1A                | 424891    | YES        | NO         | NO                    |
| 8   | 3-hydroxybutyrate dehydrogenase, type 2                                            | BDH2                 | 422715    | YES        | YES        | NO                    |
| 9   | 3-hydroxyisobutyrate dehydrogenase                                                 | HIBADH               | 420632    | YES        | YES        | NO                    |
| 10  | 3-hydroxyisobutyryl-CoA hydrolase                                                  | HIBCH                | 423979    | NO         | YES        | NO                    |
| 11  | 3-oxoacid CoA-transferase 1                                                        | OXCT1                | 427190    | YES        | YES        | YES                   |
| 12  | 3-phosphoinositide dependent protein kinase 1                                      | PDPK1                | 416588    | NO         | YES        | NO                    |
| 13  | 4-aminobutyrate aminotransferase                                                   | ABAT                 | 416642    | NO         | YES        | NO                    |
| 14  | 5-aminoimidazole-4-carboxamide ribonucleotide formyltransferase/IMP cyclohydrolase | ATIC                 | 396091    | YES        | YES        | YES                   |
| 15  | 5'-nucleotidase domain containing 2                                                | NT5DC2               | 415895    | YES        | YES        | YES                   |
| 16  | 5'-nucleotidase, cytosolic IB                                                      | NT5C1B               | 421954    | YES        | YES        | NO                    |
| 17  | 5'-nucleotidase, cytosolic II                                                      | NT5C2                | 423871    | YES        | YES        | NO                    |
| 18  | 6-phosphogluconolactonase                                                          | PGLS                 | 430442    | YES        | YES        | YES                   |
| 19  | Acetyl-CoA acetyltransferase 1                                                     | ACAT1                | 418968    | YES        | YES        | YES                   |
| 20  | Acetyl-CoA acetyltransferase 2                                                     | ACAT2                | 421587    | YES        | YES        | YES                   |
| 21  | Acetyl-CoA acyltransferase 1                                                       | ACAA1                | 770094    | YES        | YES        | NO                    |
| 22  | Acetyl-CoA acyltransferase 2                                                       | ACAA2                | 426847    | YES        | YES        | YES                   |
| 23  | Acid phosphatase 1, soluble                                                        | ACP1                 | 421909    | YES        | YES        | YES                   |
| 24  | Acidic (leucine-rich) nuclear phosphoprotein 32 family, member B                   | ANP32B               | 420087    | YES        | YES        | NO                    |
| 25  | Acidic nuclear phosphoprotein 32 family member A                                   | ANP32A               | 415562    | YES        | YES        | YES                   |
| 26  | Acidic nuclear phosphoprotein 32 family member E                                   | ANP32E               | 426109    | YES        | YES        | YES                   |
| 27  | Acireductone dioxygenase 1                                                         | ADI1                 | 421918    | YES        | YES        | NO                    |
| 28  | Aconitase 1, soluble                                                               | ACO1                 | 373916    | YES        | YES        | YES                   |
| 29  | Aconitase 2                                                                        | ACO2                 | 374009    | YES        | YES        | NO                    |
| 30  | Actin like 6A                                                                      | ACTL6A               | 424975    | YES        | NO         | YES                   |
| 31  | Actin related protein 2/3 complex subunit 1A                                       | ARPC1A               | 770269    | YES        | YES        | YES                   |
| 32  | Actin related protein 2/3 complex subunit 1B                                       | ARPC1B               | 416490    | YES        | YES        | NO                    |
| 33  | Actin related protein 2/3 complex subunit 2                                        | ARPC2                | 429041    | YES        | YES        | NO                    |
| 34  | Actin related protein 2/3 complex subunit 3                                        | ARPC3                | 416837    | YES        | YES        | YES                   |
| 35  | Actin related protein 2/3 complex subunit 4                                        | ARPC4                | 416051    | YES        | YES        | YES                   |
| 36  | Actin related protein 2/3 complex subunit 5                                        | ARPC5                | 429075    | YES        | YES        | YES                   |
| 37  | Actin related protein 2/3 complex subunit 5 like                                   | ARPC5L               | 101752218 | YES        | YES        | YES                   |
| 38  | Actin, alpha 2, smooth muscle, aorta                                               | ACTA2                | 423787    | YES        | YES        | NO                    |
| 39  | Actin, alpha, cardiac muscle 1                                                     | ACTC1                | 423298    | NO         | YES        | YES                   |
| 40  | Actin, beta-like 2                                                                 | ACTBL2               | 426652    | YES        | NO         | YES                   |
| 41  | Actin, gamma 1                                                                     | ACTG1                | 415296    | YES        | YES        | YES                   |
| 42  | Actinin, alpha 1                                                                   | ACTN1                | 373918    | YES        | YES        | NO                    |
| 43  | Actinin, alpha 4                                                                   | ACTN4                | 396024    | YES        | YES        | YES                   |

|    |                                                                                  |              |           |     |     |     |
|----|----------------------------------------------------------------------------------|--------------|-----------|-----|-----|-----|
| 44 | Activated leukocyte cell adhesion molecule                                       | ALCAM        | 396092    | YES | NO  | NO  |
| 45 | Activated RNA polymerase II transcriptional coactivator p15-like                 | LOC107055444 | 107055444 | YES | YES | NO  |
| 46 | Acylaminoacyl-peptide hydrolase                                                  | APEH         | 415926    | YES | NO  | YES |
| 47 | Acyl-CoA binding domain containing 3                                             | ACBD3        | 421317    | YES | YES | NO  |
| 48 | Acyl-CoA dehydrogenase family member 9                                           | ACAD9        | 415974    | YES | YES | NO  |
| 49 | Acyl-CoA dehydrogenase, C-2 to C-3 short chain                                   | ACADS        | 416969    | NO  | YES | NO  |
| 50 | Acyl-CoA dehydrogenase, long chain                                               | ACADL        | 424005    | YES | YES | NO  |
| 51 | Acyl-CoA dehydrogenase, short/branched chain                                     | ACADSB       | 423947    | YES | NO  | NO  |
| 52 | Acyl-CoA synthetase family member 2                                              | ACSF2        | 422102    | NO  | YES | NO  |
| 53 | Acyl-CoA synthetase long-chain family member 1                                   | ACSL1        | 422547    | YES | YES | NO  |
| 54 | Acyl-CoA synthetase short-chain family member 1A                                 | ACSS1A       | 416714    | YES | YES | YES |
| 55 | Acyl-CoA synthetase long chain family member 3                                   | ACSL3        | 424810    | YES | YES | NO  |
| 56 | Acyl-CoA thioesterase 7                                                          | ACOT7        | 419371    | YES | NO  | NO  |
| 57 | Acyl-CoA thioesterase 9                                                          | ACOT9        | 418600    | YES | YES | NO  |
| 58 | Acyl-CoA thioesterase 13                                                         | ACOT13       | 421006    | NO  | YES | NO  |
| 59 | Adaptor protein, phosphotyrosine interacting with PH domain and leucine zipper 2 | APPL2        | 418075    | NO  | YES | NO  |
| 60 | Adaptor related protein complex 1 gamma 1 subunit                                | AP1G1        | 415880    | NO  | YES | NO  |
| 61 | Adaptor related protein complex 1 mu 1 subunit                                   | AP1M1        | 420149    | YES | YES | NO  |
| 62 | Adaptor related protein complex 2 alpha 2 subunit                                | AP2A2        | 423102    | YES | YES | NO  |
| 63 | Adaptor related protein complex 2 beta 1                                         | AP2B1        | 417525    | YES | YES | NO  |
| 64 | Adaptor related protein complex 2 mu 1 subunit                                   | AP2M1        | 770246    | YES | YES | NO  |
| 65 | Adducin 1                                                                        | ADD1         | 422882    | YES | NO  | YES |
| 66 | Adenine phosphoribosyltransferase                                                | APRT         | 100857155 | YES | YES | YES |
| 67 | Adenosine deaminase                                                              | ADA          | 419194    | YES | YES | YES |
| 68 | Adenosine deaminase like                                                         | ADAL         | 415391    | NO  | NO  | YES |
| 69 | Adenosine kinase                                                                 | ADK          | 423735    | YES | YES | YES |
| 70 | Adenosine monophosphate deaminase 3                                              | AMPD3        | 423041    | NO  | NO  | YES |
| 71 | Adenosylhomocysteinase                                                           | AHCY         | 419146    | YES | YES | YES |
| 72 | Adenosylhomocysteinase like 1                                                    | AHCYL1       | 419803    | YES | YES | NO  |
| 73 | Adenylate cyclase associated protein 1                                           | CAP1         | 419680    | YES | YES | YES |
| 74 | Adenylate kinase 1                                                               | AK1          | 396002    | YES | YES | NO  |
| 75 | Adenylate kinase 2                                                               | AK2          | 428227    | YES | YES | YES |
| 76 | Adenylosuccinate lyase                                                           | ADSL         | 396540    | YES | NO  | YES |
| 77 | Adenylosuccinate synthase 1                                                      | ADSS1        | 776127    | YES | NO  | YES |
| 78 | Adenylosuccinate synthase 2                                                      | ADSS2        | 428579    | YES | NO  | NO  |
| 79 | Adiponectin, C1Q and collagen domain containing                                  | ADIPOQ       | 404536    | NO  | YES | NO  |
| 80 | ADP dependent glucokinase                                                        | ADPGK        | 415317    | YES | YES | NO  |
| 81 | ADP ribosylation factor 3                                                        | ARF3         | 107049507 | YES | YES | NO  |
| 82 | ADP ribosylation factor 4                                                        | ARF4         | 769725    | YES | YES | YES |
| 83 | ADP ribosylation factor GTPase activating protein 3                              | ARFGAP3      | 418224    | YES | NO  | NO  |
| 84 | ADP ribosylation factor like GTPase 1                                            | ARL1         | 417934    | YES | YES | NO  |
| 85 | ADP ribosylation factor like GTPase 8B                                           | ARL8B        | 416109    | YES | YES | NO  |
| 86 | ADP-ribosylation factor 6                                                        | ARF6         | 428927    | YES | YES | NO  |
| 87 | AE binding protein 1                                                             | AEBP1        | 100859431 | NO  | YES | NO  |
| 88 | Agrin                                                                            | AGRN         | 396538    | NO  | YES | NO  |
| 89 | AHNAK nucleoprotein 2                                                            | AHNAK2       | 100859120 | YES | YES | NO  |
| 90 | A-kinase anchoring protein 12                                                    | AKAP12       | 421634    | YES | YES | NO  |
| 91 | AKT serine/threonine kinase 1                                                    | AKT1         | 395928    | YES | YES | NO  |

|     |                                                                         |           |           |     |     |     |
|-----|-------------------------------------------------------------------------|-----------|-----------|-----|-----|-----|
| 92  | Alanyl aminopeptidase, membrane                                         | ANPEP     | 395667    | NO  | YES | NO  |
| 93  | Alanyl-tRNA synthetase                                                  | AARS      | 415668    | NO  | NO  | YES |
| 94  | Alanyl-tRNA synthetase 1                                                | AARS1     | 415668    | YES | NO  | NO  |
| 95  | Albumin                                                                 | ALB       | 396197    | YES | YES | YES |
| 96  | Alcohol dehydrogenase 1C (class I), gamma polypeptide                   | ADH1C     | 771920    | YES | YES | NO  |
| 97  | Alcohol dehydrogenase 4 (class II), pi polypeptide                      | ADH4      | 422705    | YES | YES | YES |
| 98  | Aldehyde dehydrogenase 1 family member A3                               | ALDH1A3   | 395389    | YES | YES | NO  |
| 99  | Aldehyde dehydrogenase 2 family (mitochondrial)                         | ALDH2     | 416880    | YES | YES | YES |
| 100 | Aldehyde dehydrogenase 3 family member A2                               | ALDH3A2   | 417615    | YES | YES | NO  |
| 101 | Aldehyde dehydrogenase 3 family, member B2                              | ALDH3B2   | 428813    | YES | YES | NO  |
| 102 | Aldehyde dehydrogenase 4 family member A1                               | ALDH4A1   | 419467    | YES | YES | NO  |
| 103 | Aldehyde dehydrogenase 5 family member A1                               | ALDH5A1   | 420818    | YES | YES | NO  |
| 104 | Aldehyde dehydrogenase 6 family member A1                               | ALDH6A1   | 423345    | YES | YES | NO  |
| 105 | Aldehyde dehydrogenase 7 family member A1                               | ALDH7A1   | 426812    | YES | YES | NO  |
| 106 | Aldehyde dehydrogenase 9 family member A1                               | ALDH9A1   | 424405    | YES | YES | YES |
| 107 | Aldehyde dehydrogenase 18 family member A1                              | ALDH18A1  | 423976    | YES | NO  | NO  |
| 108 | Aldo-keto reductase family 1 member A1                                  | AKR1A1    | 424599    | YES | YES | YES |
| 109 | Aldo-keto reductase family 1, member B10                                | AKR1B1    | 418169    | YES | YES | YES |
| 110 | Aldo-keto reductase family 1 member B10                                 | AKR1B10   | 395338    | YES | YES | NO  |
| 111 | Aldo-keto reductase family 1, member B1-like                            | LOC425137 | 425137    | YES | YES | NO  |
| 112 | Aldo-keto reductase family 1 member B10-like                            | LOC418170 | 418170    | YES | YES | YES |
| 113 | Aldo-keto reductase family 7 member A2                                  | AKR7A2    | 419471    | YES | YES | NO  |
| 114 | Aldolase, fructose-bisphosphate B                                       | ALDOB     | 427308    | YES | YES | YES |
| 115 | Aldolase, fructose-bisphosphate C                                       | ALDOC     | 395492    | YES | YES | YES |
| 116 | ALG12, alpha-1,6-mannosyltransferase                                    | ALG12     | 417733    | YES | YES | NO  |
| 117 | ALG14, UDP-N-acetylglucosaminyltransferase subunit                      | ALG14     | 424484    | YES | YES | NO  |
| 118 | Alpha 2-HS glycoprotein                                                 | AHSG      | 424956    | NO  | YES | YES |
| 119 | Alpha fetoprotein                                                       | AFP       | 422652    | YES | YES | YES |
| 120 | Alpha-1-microglobulin/bikunin precursor                                 | AMBIP     | 770795    | YES | YES | YES |
| 121 | Alpha-2-macroglobulin                                                   | A2M       | 418251    | NO  | YES | YES |
| 122 | Alpha-2-macroglobulin-like 1                                            | A2ML1     | 418254    | YES | YES | NO  |
| 123 | Alpha-2-macroglobulin-like 2                                            | A2ML2     | 427942    | NO  | YES | YES |
| 124 | Alpha-2-macroglobulin-like 4                                            | A2ML4     | 100858010 | NO  | NO  | YES |
| 125 | Alpha-L-fucosidase 2                                                    | FUCA2     | 421668    | YES | YES | NO  |
| 126 | Alpha-N-acetylgalactosaminidase                                         | NAGA      | 396547    | YES | YES | NO  |
| 127 | Aly/REF export factor                                                   | ALYREF    | 769169    | YES | NO  | YES |
| 128 | Amine oxidase, copper containing 3                                      | AOC3      | 420015    | YES | YES | NO  |
| 129 | Aminoacyl tRNA synthetase complex interacting multifunctional protein 1 | AIMP1     | 422533    | YES | YES | YES |
| 130 | Aminoacylase 1                                                          | ACY1      | 100858836 | NO  | YES | NO  |
| 131 | Amino adipate-semialdehyde synthase                                     | AASS      | 417757    | YES | YES | NO  |
| 132 | Aminolevulinatase dehydratase                                           | ALAD      | 417273    | YES | YES | YES |
| 133 | Aminomethyltransferase                                                  | AMT       | 395566    | NO  | YES | NO  |
| 134 | Aminopeptidase puromycin sensitive                                      | NPEPPS    | 426231    | YES | YES | YES |
| 135 | Aminopeptidase-like 1                                                   | NPEPL1    | 419314    | YES | YES | YES |
| 136 | Amylo-alpha-1, 6-glucosidase, 4-alpha-glucanotransferase                | AGL       | 424474    | NO  | YES | NO  |
| 137 | Angiotensinogen                                                         | AGT       | 421543    | YES | YES | YES |
| 138 | Ankyrin 1                                                               | ANK1      | 396311    | YES | YES | YES |
| 139 | Ankyrin repeat and FYVE domain containing 1                             | ANKFY1    | 417494    | NO  | NO  | YES |

|     |                                                                                          |         |           |     |     |     |
|-----|------------------------------------------------------------------------------------------|---------|-----------|-----|-----|-----|
| 140 | Annexin A1                                                                               | ANXA1   | 404271    | YES | YES | NO  |
| 141 | Annexin A2                                                                               | ANXA2   | 396297    | YES | YES | NO  |
| 142 | Annexin A4                                                                               | ANXA4   | 772393    | YES | YES | YES |
| 143 | Annexin A5                                                                               | ANXA5   | 428767    | YES | YES | NO  |
| 144 | Annexin A6                                                                               | ANXA6   | 395481    | YES | YES | YES |
| 145 | Annexin A7                                                                               | ANXA7   | 423747    | YES | YES | NO  |
| 146 | Annexin A8-like                                                                          | ANXA8L1 | 423774    | YES | YES | NO  |
| 147 | Annexin A11                                                                              | ANXA11  | 423637    | YES | YES | YES |
| 148 | Anterior gradient 2, protein disulphide isomerase family member                          | AGR2    | 420596    | YES | YES | NO  |
| 149 | Apolipoprotein A1                                                                        | APOA1   | 396536    | YES | YES | YES |
| 150 | Apolipoprotein A4                                                                        | APOA4   | 395780    | YES | YES | YES |
| 151 | Apolipoprotein A-I binding protein                                                       | APOA1BP | 426569    | YES | YES | NO  |
| 152 | Apolipoprotein A-II                                                                      | APOA2   | 100858842 | NO  | YES | YES |
| 153 | Apolipoprotein B                                                                         | APOB1   | 396535    | YES | YES | YES |
| 154 | Apolipoprotein D                                                                         | APOD    | 424893    | NO  | YES | NO  |
| 155 | Apolipoprotein H                                                                         | APOH    | 417431    | NO  | YES | YES |
| 156 | Apolipoprotein O                                                                         | APOO    | 418599    | YES | NO  | NO  |
| 157 | Apoptosis inhibitor 5                                                                    | API5    | 423168    | YES | YES | YES |
| 158 | Apoptotic peptidase activating factor 1                                                  | APAF1   | 417926    | NO  | NO  | YES |
| 159 | Apurinic/apyrimidinic endodeoxyribonuclease 1                                            | APEX1   | 100431102 | YES | YES | YES |
| 160 | Aquaporin 3                                                                              | AQP3    | 426894    | YES | YES | NO  |
| 161 | Archain 1                                                                                | ARCN1   | 770561    | YES | YES | YES |
| 162 | ArfGAP with coiled-coil, ankyrin repeat and PH domains 2                                 | ACAP2   | 424895    | YES | NO  | NO  |
| 163 | Argininosuccinate lyase 2                                                                | ASL2    | 417545    | YES | YES | NO  |
| 164 | Arginyl aminopeptidase                                                                   | RNPEP   | 421165    | YES | YES | NO  |
| 165 | Arginyl-tRNA synthetase                                                                  | RARS    | 416168    | YES | YES | YES |
| 166 | Argonaute 1, RISC catalytic component                                                    | AGO1    | 428222    | YES | NO  | YES |
| 167 | Argonaute 3, RISC catalytic component                                                    | AGO3    | 419628    | NO  | YES | NO  |
| 168 | ARP1 actin-related protein 1 homolog A, cetractin alpha                                  | ACTR1A  | 423862    | YES | YES | YES |
| 169 | ARP2 actin related protein 2 homolog                                                     | ACTR2   | 396147    | YES | YES | YES |
| 170 | ARP3 actin related protein 3 homolog                                                     | ACTR3   | 374197    | YES | YES | YES |
| 171 | ArsA arsenite transporter, ATP-binding, homolog 1 (bacterial)                            | ASNA1   | 100859771 | YES | YES | YES |
| 172 | Arsenite methyltransferase                                                               | AS3MT   | 423870    | YES | YES | NO  |
| 173 | Asparagine synthetase [glutamine-hydrolyzing]                                            | ASNS    | 420574    | YES | YES | NO  |
| 174 | Asparaginyl-tRNA synthetase                                                              | NARS    | 426856    | YES | YES | NO  |
| 175 | Aspartyl aminopeptidase                                                                  | DNPEP   | 424200    | YES | YES | YES |
| 176 | Aspartyl-tRNA synthetase                                                                 | DARS    | 424296    | YES | YES | YES |
| 177 | Astacin like metalloendopeptidase                                                        | ASTL    | 423176    | YES | NO  | NO  |
| 178 | Atlantin GTPase 1                                                                        | ATL1    | 423577    | YES | YES | NO  |
| 179 | ATP binding cassette subfamily B member 10                                               | ABCB10  | 421537    | YES | NO  | YES |
| 180 | ATP binding cassette subfamily E member 1                                                | ABCE1   | 422462    | YES | YES | YES |
| 181 | ATP citrate lyase                                                                        | ACLY    | 395373    | YES | YES | YES |
| 182 | ATP synthase mitochondrial F1 complex assembly factor 2                                  | ATPAF2  | 416511    | YES | YES | NO  |
| 183 | ATP synthase peripheral stalk-membrane subunit b                                         | ATP5PB  | 419866    | YES | YES | NO  |
| 184 | ATP synthase, H+ transporting, mitochondrial F1 complex, alpha subunit 1, cardiac muscle | ATP5A1W | 431564    | YES | YES | YES |
| 185 | ATP synthase, H+ transporting, mitochondrial F1 complex, beta polypeptide                | ATP5B   | 426673    | YES | YES | YES |
| 186 | ATP synthase, H+ transporting, mitochondrial F1 complex, gamma polypeptide 1             | ATP5C1  | 419108    | YES | YES | NO  |

|     |                                                                    |              |           |     |     |     |
|-----|--------------------------------------------------------------------|--------------|-----------|-----|-----|-----|
| 187 | ATP synthase, H+ transporting, mitochondrial F1 complex, O subunit | ATP5O        | 418508    | YES | YES | NO  |
| 188 | ATP synthase, H+ transporting, mitochondrial Fo complex subunit D  | ATP5H        | 422115    | YES | YES | NO  |
| 189 | ATPase H+ transporting V0 subunit a4                               | ATP6V0A4     | 418104    | NO  | YES | NO  |
| 190 | ATPase H+ transporting V0 subunit d1                               | ATP6V0D1     | 415674    | YES | NO  | NO  |
| 191 | ATPase H+ transporting V1 subunit A                                | ATP6V1A      | 395821    | YES | YES | YES |
| 192 | ATPase H+ transporting V1 subunit B2                               | ATP6V1B2     | 395497    | YES | YES | YES |
| 193 | ATPase H+ transporting V1 subunit C2                               | ATP6V1C2     | 421939    | NO  | YES | NO  |
| 194 | ATPase H+ transporting V1 subunit D                                | ATP6V1D      | 423280    | NO  | YES | NO  |
| 195 | ATPase H+ transporting V1 subunit E1                               | ATP6V1E1     | 418162    | YES | YES | NO  |
| 196 | ATPase H+ transporting V1 subunit G1                               | ATP6V1G1     | 417249    | YES | YES | NO  |
| 197 | ATPase H+ transporting V1 subunit H                                | ATP6V1H      | 426199    | NO  | YES | YES |
| 198 | ATPase Na+/K+ transporting subunit alpha 1                         | ATP1A1       | 396530    | YES | YES | YES |
| 199 | ATPase Na+/K+ transporting subunit beta 1                          | ATP1B1       | 396529    | YES | YES | NO  |
| 200 | ATPase Na+/K+ transporting subunit beta-3                          | ATP1B3       | 396549    | YES | YES | NO  |
| 201 | ATPase plasma membrane Ca2+ transporting 4                         | ATP2B4       | 419934    | YES | YES | YES |
| 202 | ATPase sarcoplasmic/endoplasmic reticulum Ca2+ transporting 2      | ATP2A2       | 396446    | YES | YES | NO  |
| 203 | Attachment region binding protein                                  | ARBP         | 395523    | YES | NO  | NO  |
| 204 | AU RNA binding methylglutaconyl-CoA hydratase                      | AUH          | 427269    | YES | YES | NO  |
| 205 | Autophagy related 3                                                | ATG3         | 418369    | NO  | NO  | YES |
| 206 | Basic leucine zipper and W2 domains 1                              | BZW1         | 424073    | YES | YES | NO  |
| 207 | Basic leucine zipper and W2 domains 2                              | BZW2         | 420594    | YES | YES | NO  |
| 208 | Basigin (Ok blood group)                                           | BSG          | 770363    | YES | YES | YES |
| 209 | B-cell receptor associated protein 29                              | BCAP29       | 417702    | YES | YES | NO  |
| 210 | BCL2 associated athanogene 2                                       | BAG2         | 421880    | YES | NO  | NO  |
| 211 | BCL2 interacting protein 1                                         | BNIP1        | 416207    | YES | NO  | NO  |
| 212 | BCL2 like 1                                                        | BCL2L1       | 373954    | NO  | NO  | YES |
| 213 | BCL2 like 15                                                       | BCL2L15      | 772088    | YES | YES | NO  |
| 214 | Beta-arrestin 1                                                    | LOC107051449 | 107051449 | YES | YES | NO  |
| 215 | BH3 interacting domain death agonist                               | BID          | 395236    | YES | YES | YES |
| 216 | Bile acid-CoA: amino acid N-acyltransferase                        | BAAT         | 769879    | YES | YES | NO  |
| 217 | Biliverdin reductase A                                             | BLVRA        | 420776    | YES | NO  | YES |
| 218 | Bisphosphoglycerate mutase                                         | BPGM         | 418172    | YES | YES | YES |
| 219 | Bleomycin hydrolase                                                | BLMH         | 395996    | YES | YES | YES |
| 220 | BPI fold containing family B member 2                              | BPIFB2       | 395882    | YES | YES | NO  |
| 221 | Brain abundant membrane attached signal protein 1                  | BASP1        | 373905    | YES | YES | NO  |
| 222 | Brain and reproductive organ-expressed (TNFRSF1A modulator)        | BRE          | 421417    | YES | YES | YES |
| 223 | BRCA1/BRCA2-containing complex subunit 3                           | BRCC3        | 422201    | YES | NO  | NO  |
| 224 | Breast carcinoma amplified sequence 2                              | BCAS2        | 419884    | YES | YES | NO  |
| 225 | Bridging integrator 1                                              | BIN1         | 424288    | YES | NO  | NO  |
| 226 | BRO1 domain and CAAX motif containing                              | BROX         | 421334    | YES | YES | YES |
| 227 | BUB3, mitotic checkpoint protein                                   | BUB3         | 423949    | YES | YES | YES |
| 228 | BUD31 homolog                                                      | BUD31        | 416492    | YES | YES | YES |
| 229 | Cadherin 1                                                         | CDH1         | 415860    | YES | YES | NO  |
| 230 | Cadherin 13                                                        | CDH13        | 414849    | NO  | YES | NO  |
| 231 | Calcineurin like EF-hand protein 1                                 | CHP1         | 423211    | YES | YES | NO  |
| 232 | Calcium binding protein 39                                         | CAB39        | 424830    | NO  | YES | NO  |
| 233 | Calcium regulated heat stable protein 1                            | CARHSP1      | 416640    | YES | YES | NO  |
| 234 | Calcium voltage-gated channel auxiliary subunit alpha2 delta 1     | CACNA2D1     | 768444    | NO  | YES | NO  |

|     |                                                                                  |           |           |     |     |     |
|-----|----------------------------------------------------------------------------------|-----------|-----------|-----|-----|-----|
| 235 | Calcium/calmodulin dependent protein kinase II delta                             | CAMK2D    | 422688    | YES | YES | NO  |
| 236 | Calcium/calmodulin dependent protein kinase II gamma                             | CAMK2G    | 423737    | YES | YES | NO  |
| 237 | Calcium/calmodulin dependent serine protein kinase                               | CASK      | 418565    | NO  | YES | NO  |
| 238 | Calcium-binding protein                                                          | P22       | 396352    | YES | YES | YES |
| 239 | Caldesmon 1                                                                      | CALD1     | 373965    | YES | YES | NO  |
| 240 | Calmodulin 1 (phosphorylase kinase, delta)                                       | CALM1     | 396523    | YES | YES | YES |
| 241 | Calmodulin like 3                                                                | CALML3    | 416692    | YES | YES | NO  |
| 242 | Calpain 1                                                                        | CAPN1     | 693249    | YES | YES | YES |
| 243 | Calpain 11                                                                       | CAPN11    | 396240    | YES | YES | NO  |
| 244 | Calpain small subunit                                                            | LOC395965 | 395956    | YES | YES | YES |
| 245 | Calpain small subunit 2                                                          | CAPNS2    | 770982    | NO  | YES | NO  |
| 246 | Calpastatin                                                                      | CAST      | 427121    | YES | YES | YES |
| 247 | Calponin 1                                                                       | CNN1      | 396522    | YES | YES | NO  |
| 248 | Calponin 2                                                                       | CNN2      | 100216000 | YES | YES | NO  |
| 249 | Calreticulin                                                                     | CALR      | 100859104 | YES | YES | YES |
| 250 | Canopy FGF signaling regulator 2                                                 | CNPY2     | 100858933 | YES | YES | NO  |
| 251 | CAP-Gly domain containing linker protein 1                                       | CLIP1     | 395784    | NO  | YES | NO  |
| 252 | Capping actin protein of muscle Z-line alpha subunit 1                           | CAPZA1    | 396521    | YES | YES | YES |
| 253 | Capping actin protein of muscle Z-line alpha subunit 2                           | CAPZA2    | 417771    | YES | YES | NO  |
| 254 | Capping actin protein of muscle Z-line beta subunit                              | CAPZB     | 396418    | YES | YES | YES |
| 255 | Capping actin protein, gelsolin like                                             | CAPG      | 431244    | YES | YES | YES |
| 256 | Caprin family member 2                                                           | CAPRIN2   | 418141    | NO  | NO  | YES |
| 257 | Carbamoyl-phosphate synthetase 2, aspartate transcarbamylase, and dihydroorotase | CAD       | 428659    | YES | YES | YES |
| 258 | Carbonic anhydrase 2                                                             | CA2       | 396257    | YES | YES | YES |
| 259 | Carbonyl reductase 3                                                             | CBR3      | 418512    | YES | YES | YES |
| 260 | Carbonic anhydrase 13                                                            | CA13      | 100858989 | YES | YES | YES |
| 261 | Carboxylesterase 1 like 2                                                        | CES1L2    | 769339    | NO  | YES | NO  |
| 262 | Carboxymethylenebutenolidase homolog                                             | CMBL      | 420928    | YES | YES | NO  |
| 263 | Carboxypeptidase D                                                               | CPD       | 417590    | YES | YES | NO  |
| 264 | Carboxypeptidase M                                                               | CPM       | 417843    | YES | YES | NO  |
| 265 | Carnitine palmitoyltransferase 1A                                                | CPT1A     | 423118    | YES | YES | NO  |
| 266 | Carnitine palmitoyltransferase 2                                                 | CPT2      | 424649    | YES | NO  | NO  |
| 267 | Carnosine synthase 1                                                             | CARNS1    | 100359387 | NO  | NO  | YES |
| 268 | Cartilage associated protein                                                     | CRTAP     | 395992    | YES | NO  | NO  |
| 269 | Casein kinase2 alpha 1                                                           | CSNK2A1   | 432370    | YES | YES | NO  |
| 270 | Caspase 3                                                                        | CASP3     | 395476    | YES | NO  | YES |
| 271 | Catalase                                                                         | CAT       | 423600    | YES | YES | YES |
| 272 | Catenin alpha 1                                                                  | CTNNA1    | 416184    | YES | YES | NO  |
| 273 | Catenin beta 1                                                                   | CTNNB1    | 395964    | YES | YES | NO  |
| 274 | Cathelicidin antimicrobial peptide                                               | CAMP      | 420407    | YES | YES | YES |
| 275 | Cathelicidin-1                                                                   | CATH1     | 414337    | YES | YES | YES |
| 276 | Cathepsin A                                                                      | CTSA      | 428163    | YES | YES | NO  |
| 277 | Cathepsin B                                                                      | CTSB      | 396329    | YES | YES | NO  |
| 278 | Cathepsin C                                                                      | CTSC      | 419014    | YES | YES | NO  |
| 279 | Cathepsin D                                                                      | CTSD      | 396090    | YES | YES | NO  |
| 280 | Cathepsin E-A-like                                                               | CTSEAL    | 417848    | YES | NO  | NO  |
| 281 | Cathepsin Z                                                                      | CTSZ      | 419311    | NO  | YES | NO  |
| 282 | Caveolin 1                                                                       | CAV1      | 373996    | YES | YES | NO  |

|     |                                                    |             |           |     |     |     |
|-----|----------------------------------------------------|-------------|-----------|-----|-----|-----|
| 283 | CCHC-type zinc finger nucleic acid binding protein | CNBP        | 395731    | YES | YES | NO  |
| 284 | CD9 molecule                                       | CD9         | 395527    | NO  | YES | NO  |
| 285 | CD55 molecule (Cromer blood group)                 | CD55        | 419852    | NO  | YES | YES |
| 286 | CD81 molecule                                      | CD81        | 374256    | NO  | YES | NO  |
| 287 | CD109 molecule                                     | CD109       | 421862    | NO  | YES | NO  |
| 288 | CD151 molecule (Raph blood group)                  | CD151       | 423105    | NO  | YES | NO  |
| 289 | CD276 molecule                                     | CD276       | 415315    | YES | NO  | NO  |
| 290 | Cell cycle associated protein 1                    | CAPRN1      | 426151    | YES | NO  | NO  |
| 291 | Cell division cycle 37                             | CDC37       | 395430    | YES | NO  | NO  |
| 292 | Cell division cycle 42                             | CDC42       | 395917    | YES | YES | NO  |
| 293 | Cell division cycle and apoptosis regulator 1      | CCAR1       | 423692    | NO  | NO  | YES |
| 294 | Cell wall biogenesis 43 C-terminal homolog         | CWH43       | 422763    | NO  | YES | NO  |
| 295 | Centrosomal protein 250                            | CEP250      | 419138    | YES | NO  | NO  |
| 296 | C-factor-like                                      | LOC515662   | 415662    | NO  | YES | NO  |
| 297 | Chaperonin containing TCP1 subunit 2               | CCT2        | 417846    | YES | YES | YES |
| 298 | Chaperonin containing TCP1 subunit 3               | CCT3        | 425644    | YES | YES | YES |
| 299 | Chaperonin containing TCP1 subunit 4               | CCT4        | 395414    | YES | YES | YES |
| 300 | Chaperonin containing TCP1 subunit 5               | CCT5        | 420930    | YES | YES | YES |
| 301 | Chaperonin containing TCP1 subunit 6A              | CCT6A       | 417541    | YES | YES | YES |
| 302 | Chaperonin containing TCP1 subunit 7               | CCT7        | 428806    | YES | YES | YES |
| 303 | Chaperonin containing TCP1 subunit 8               | CCT8        | 418486    | YES | YES | YES |
| 304 | Charged multivesicular body protein 6              | CHMP6       | 428673    | YES | YES | NO  |
| 305 | Chloride intracellular channel 2                   | CLIC2       | 422178    | YES | YES | YES |
| 306 | Chloride intracellular channel 3                   | CLIC3       | 417293    | YES | YES | NO  |
| 307 | Chloride intracellular channel 4                   | CLIC4       | 419595    | YES | YES | NO  |
| 308 | Chondroitin sulfate proteoglycan 4                 | CSPG4       | 425524    | YES | YES | NO  |
| 309 | Chromobox 3                                        | CBX3        | 395355    | YES | YES | NO  |
| 310 | chromosome 1 open reading frame, human C11orf54    | C11H11ORF54 | 419001    | YES | YES | YES |
| 311 | Chromosome 5 C14orf166 homolog                     | C5H14ORF166 | 396326    | YES | YES | NO  |
| 312 | Chromosome 8 C1orf123 homolog                      | C8H1orf123  | 424650    | NO  | YES | NO  |
| 313 | Chromosome 33 C12orf10 homolog                     | C33H12orf10 | 426187    | YES | YES | YES |
| 314 | Chromosome segregation 1 like                      | CSE1L       | 419212    | YES | YES | YES |
| 315 | Chromosome transmission fidelity factor 18         | CHTF18      | 416531    | YES | YES | NO  |
| 316 | Citrate synthase                                   | CS          | 100858903 | YES | YES | YES |
| 317 | Clanexin                                           | CANX        | 416288    | YES | YES | YES |
| 318 | Clathrin heavy chain                               | CLTC        | 395272    | YES | YES | YES |
| 319 | Clathrin interactor 1                              | CLINT1      | 416240    | YES | YES | NO  |
| 320 | Clathrin light chain A                             | CLTA        | 427284    | YES | NO  | NO  |
| 321 | Clathrin light chain B                             | CLTB        | 416226    | YES | YES | NO  |
| 322 | Clathrin, heavy chain-like 1                       | CLTCL1      | 416765    | YES | YES | NO  |
| 323 | Claudin 1                                          | CLDN1       | 424910    | YES | YES | NO  |
| 324 | Cleavage and polyadenylation specific factor 6     | CPSF6       | 417844    | NO  | NO  | YES |
| 325 | Cleavage stimulation factor subunit 3              | CSTF3       | 421595    | YES | NO  | YES |
| 326 | Clustered mitochondria homolog                     | CLUH        | 417675    | NO  | YES | NO  |
| 327 | Clusterin                                          | CLU         | 395722    | YES | YES | NO  |
| 328 | CNDP dipeptidase 2 (metallopeptidase M20 family)   | CNDP2       | 421013    | YES | YES | YES |
| 329 | Coagulation factor XIII A chain                    | F13A1       | 395420    | YES | YES | YES |
| 330 | Coatmer protein complex subunit alpha              | COPA        | 426906    | YES | YES | YES |

|     |                                                         |              |           |     |     |     |
|-----|---------------------------------------------------------|--------------|-----------|-----|-----|-----|
| 331 | Coatamer protein complex subunit beta 1                 | COPB1        | 423063    | YES | YES | YES |
| 332 | Coatamer protein complex subunit beta 2                 | COPB2        | 424823    | YES | YES | YES |
| 333 | Coatamer protein complex subunit gamma 1                | COPG1        | 416014    | YES | YES | NO  |
| 334 | Coenzyme Q4                                             | COQ4         | 417219    | YES | YES | NO  |
| 335 | Coenzyme Q8A                                            | COQ8A        | 416745    | YES | NO  | NO  |
| 336 | Cofilin-2                                               | CFL2         | 423320    | YES | YES | YES |
| 337 | Coiled-coil domain containing 25                        | CCDC25       | 422005    | YES | YES | NO  |
| 338 | Coiled-coil domain containing 93                        | CCDC93       | 424277    | YES | YES | NO  |
| 339 | Coiled-coil-helix-coiled-coil-helix domain containing 3 | CHCHD3       | 418435    | YES | YES | NO  |
| 340 | Coiled-coil-helix-coiled-coil-helix domain containing 4 | CHCHD4       | 416037    | YES | YES | NO  |
| 341 | Cold shock domain containing E1                         | CSDE1        | 419886    | YES | YES | NO  |
| 342 | Collagen alpha-2(IV) chain-like                         | LOC107051274 | 107051274 | YES | YES | YES |
| 343 | Collagen type I alpha 1 chain                           | COL1A1       | 395532    | YES | YES | NO  |
| 344 | Collagen type I alpha 2 chain                           | COL1A2       | 396243    | YES | YES | NO  |
| 345 | Collagen type III alpha 1 chain                         | COL3A1       | 396340    | YES | YES | NO  |
| 346 | Collagen type IV alpha 1 chain                          | COL4A1       | 395530    | YES | YES | NO  |
| 347 | Collagen type IV alpha 2 chain                          | COL4A2       | 418752    | YES | YES | NO  |
| 348 | collagen type V alpha 2 chain                           | COL5A2       | 423986    | NO  | YES | NO  |
| 349 | Collagen type VI alpha 1 chain                          | COL6A1       | 396000    | YES | YES | NO  |
| 350 | Collagen type VI alpha 2 chain                          | COL6A2       | 396292    | YES | YES | NO  |
| 351 | Collagen type VI alpha 3 chain                          | COL6A3       | 396548    | YES | YES | NO  |
| 352 | Collagen, type VII, alpha 1                             | COL7A1       | 427584    | YES | NO  | NO  |
| 353 | Collagen type XI alpha 1 chain                          | COL11A1      | 374046    | YES | YES | NO  |
| 354 | Collagen type XII alpha 1 chain                         | COL12A1      | 395875    | YES | YES | NO  |
| 355 | Collagen, type XVIII, alpha 1                           | COL18A1      | 373978    | YES | YES | NO  |
| 356 | Collectin subfamily member 12                           | COLEC12      | 421061    | YES | YES | NO  |
| 357 | COMM domain containing 4                                | COMMD4       | 770048    | NO  | YES | NO  |
| 358 | COMM domain containing 5                                | COMMD5       | 422376    | YES | YES | NO  |
| 359 | COMM domain containing 6                                | COMMD6       | 769778    | YES | YES | NO  |
| 360 | COMM domain containing 7                                | COMMD7       | 419286    | YES | YES | NO  |
| 361 | Complement C1q binding protein                          | C1QBP        | 395538    | YES | YES | NO  |
| 362 | Complement component 3                                  | C3           | 396370    | NO  | YES | YES |
| 363 | Complement component 4 binding protein, alpha           | C4BPA        | 395384    | YES | YES | YES |
| 364 | Complement factor D                                     | CFD          | 100857593 | YES | YES | NO  |
| 365 | Complement factor H                                     | CFH          | 429057    | NO  | YES | YES |
| 366 | COP9 signalosome subunit 2                              | COPS2        | 430917    | YES | NO  | YES |
| 367 | COP9 signalosome subunit 4                              | COPS4        | 422594    | YES | YES | YES |
| 368 | COP9 signalosome subunit 5                              | COPS5        | 426579    | NO  | NO  | YES |
| 369 | COP9 signalosome subunit 7A                             | COPS7A       | 418283    | YES | YES | YES |
| 370 | Copine 1                                                | CPNE1        | 419134    | YES | YES | YES |
| 371 | Copine 3                                                | CPNE3        | 420214    | YES | YES | YES |
| 372 | Copper metabolism domain containing 1                   | COMMD1       | 769006    | NO  | YES | NO  |
| 373 | Coproporphyrinogen oxidase                              | CPOX         | 418377    | YES | YES | YES |
| 374 | Core-binding factor beta subunit                        | CBFB         | 395257    | NO  | YES | NO  |
| 375 | Coronin 1C                                              | CORO1C       | 416893    | YES | YES | YES |
| 376 | Coronin-1B-like                                         | LOC107056441 | 107056441 | NO  | YES | NO  |
| 377 | Cortactin                                               | CTTN         | 396455    | YES | NO  | NO  |
| 378 | COX20, cytochrome c oxidase assembly factor             | COX20        | 421493    | YES | NO  | NO  |



|     |                                                 |           |           |     |     |     |
|-----|-------------------------------------------------|-----------|-----------|-----|-----|-----|
| 379 | C-reactive protein, pentraxin-related           | LOC776376 | 776376    | NO  | NO  | YES |
| 380 | Creatine kinase B                               | CKB       | 396248    | YES | YES | YES |
| 381 | CRK proto-oncogene, adaptor protein             | CRK       | 417553    | YES | YES | YES |
| 382 | Crystallin lambda 1                             | CRYL1     | 418953    | NO  | YES | NO  |
| 383 | Crystallin zeta                                 | CRYZ      | 772289    | NO  | YES | YES |
| 384 | C-terminal binding protein 1                    | CTBP1     | 422904    | YES | NO  | YES |
| 385 | C-terminal Src kinase                           | CSK       | 396396    | YES | YES | NO  |
| 386 | CTP synthase 1                                  | CTPS1     | 419561    | NO  | NO  | YES |
| 387 | Cullin 3                                        | CUL3      | 424804    | NO  | YES | NO  |
| 388 | Cullin 4A                                       | CUL4A     | 418744    | YES | YES | NO  |
| 389 | Cullin associated and neddylation dissociated 1 | CAND1     | 417837    | YES | YES | YES |
| 390 | CWF19-like 1, cell cycle control (S. pombe)     | CWF19L1   | 101749626 | YES | NO  | NO  |
| 391 | Cyclin dependent kinase 1                       | CDK1      | 396252    | YES | NO  | NO  |
| 392 | Cyclin dependent kinase 5                       | CDK5      | 100190948 | YES | YES | NO  |
| 393 | Cystathionine gamma-lyase                       | CTH       | 424716    | YES | YES | YES |
| 394 | Cystathionine-beta-synthase                     | CBS       | 418545    | YES | NO  | YES |
| 395 | Cystatin B                                      | CSTB      | 418267    | YES | YES | NO  |
| 396 | Cystatin C                                      | CST3      | 396497    | YES | YES | NO  |
| 397 | Cystatin F                                      | CST7      | 416716    | NO  | YES | NO  |
| 398 | Cysteine and glycine rich protein 1             | CSRP1     | 396176    | YES | YES | NO  |
| 399 | Cysteine and glycine rich protein 2             | CSRP2     | 396128    | YES | YES | NO  |
| 400 | CysteinyI-tRNA synthetase                       | CARS      | 423086    | YES | YES | NO  |
| 401 | Cytidine/uridine monophosphate kinase 1         | CMPK1     | 429100    | YES | YES | YES |
| 402 | Cytochrome b5 reductase 1                       | CYB5R1    | 418220    | YES | YES | NO  |
| 403 | Cytochrome b5 type A                            | CYB5A     | 414798    | YES | YES | YES |
| 404 | Cytochrome b5 type B                            | CYB5B     | 415865    | YES | YES | NO  |
| 405 | Cytochrome c oxidase subunit 4I1                | COX4I1    | 415826    | YES | YES | YES |
| 406 | Cytochrome c oxidase subunit II                 | COX2      | 39116936  | YES | YES | NO  |
| 407 | Cytochrome c, somatic                           | CYCS      | 420624    | YES | YES | NO  |
| 408 | Cytochrome p450 oxidoreductase                  | POR       | 417520    | YES | YES | NO  |
| 409 | Cytoglobin                                      | CYGB      | 427802    | YES | YES | NO  |
| 410 | Cytokine induced apoptosis inhibitor 1          | CIAPIN1   | 415637    | YES | YES | YES |
| 411 | Cytoplasmic FMR1 interacting protein 1          | CYFIP1    | 418677    | YES | YES | NO  |
| 412 | Cytoskeleton associated protein 4               | CKAP4     | 418073    | YES | YES | YES |
| 413 | Cytosolic iron-sulfur assembly component 1      | CIAO1     | 426332    | NO  | NO  | YES |
| 414 | Damage specific DNA binding protein 1           | DDB1      | 374050    | YES | YES | YES |
| 415 | DAZ associated protein 1                        | DAZAP1    | 427266    | YES | NO  | YES |
| 416 | DEAD (Asp-Glu-Ala-Asp) box polypeptide 39B      | DDX39B    | 100529080 | YES | YES | YES |
| 417 | DEAD-box helicase 1                             | DDX1      | 395249    | YES | YES | YES |
| 418 | DEAD-box helicase 3, X-linked                   | DDX3X     | 418567    | YES | NO  | YES |
| 419 | DEAD-box helicase 5                             | DDX5      | 395629    | YES | NO  | NO  |
| 420 | DEAD-box helicase 6                             | DDX6      | 419783    | YES | YES | YES |
| 421 | DEAH-box helicase 15                            | DHX15     | 422813    | YES | NO  | YES |
| 422 | DEAD-box helicase 17                            | DDX17     | 418024    | YES | YES | YES |
| 423 | DEAD-box helicase 19                            | DDX19     | 426504    | YES | YES | YES |
| 424 | DEAD-box helicase 23                            | DDX23     | 100858001 | YES | NO  | NO  |
| 425 | Decorin                                         | DCN       | 417892    | YES | YES | NO  |
| 426 | Dedicator of cytokinesis 1                      | DOCK1     | 423960    | YES | YES | NO  |

|     |                                                                                      |           |        |     |     |     |
|-----|--------------------------------------------------------------------------------------|-----------|--------|-----|-----|-----|
| 427 | Dedicator of cytokinesis 10                                                          | DOCK10    | 424803 | NO  | YES | NO  |
| 428 | Dehydrogenase/reductase 4                                                            | DHRS4     | 426247 | YES | YES | NO  |
| 429 | Dehydrogenase/reductase 7                                                            | DHRS7     | 423527 | YES | YES | YES |
| 430 | DEK proto-oncogene                                                                   | DEK       | 420828 | NO  | NO  | YES |
| 431 | Dematin actin binding protein                                                        | DMTN      | 776542 | NO  | NO  | YES |
| 432 | Dephospho-CoA kinase domain containing                                               | DCAKD     | 419967 | NO  | YES | NO  |
| 433 | Desmin                                                                               | DES       | 395906 | YES | YES | NO  |
| 434 | Desmoglein 2                                                                         | DSG2      | 428529 | YES | NO  | NO  |
| 435 | Desmoplakin                                                                          | DSP       | 420869 | YES | YES | NO  |
| 436 | Dextrin, actin depolymerizing factor                                                 | DSTN      | 396539 | YES | YES | YES |
| 437 | Developmentally regulated GTP binding protein 1                                      | DRG1      | 416962 | YES | NO  | NO  |
| 438 | Diablo IAP-binding mitochondrial protein                                             | DIABLO    | 416860 | YES | YES | NO  |
| 439 | Dicarbonyl and L-xylulose reductase                                                  | DCXR      | 374066 | YES | YES | YES |
| 440 | Dihydrofolate reductase                                                              | DHFR      | 427317 | YES | NO  | NO  |
| 441 | Dihydrolipoamide branched chain transacylase E2                                      | DBT       | 395374 | YES | YES | NO  |
| 442 | Dihydrolipoamide dehydrogenase                                                       | DLD       | 417699 | YES | YES | NO  |
| 443 | Dihydrolipoamide S-acetyltransferase                                                 | DLAT      | 419796 | YES | YES | NO  |
| 444 | Dihydrolipoamide S-succinyltransferase                                               | DLST      | 423357 | YES | YES | NO  |
| 445 | Dihydropyrimidinase like 2                                                           | DPYSL2    | 395155 | YES | YES | NO  |
| 446 | Dihydropyrimidinase like 3                                                           | DPYSL3    | 395154 | YES | YES | NO  |
| 447 | Dipeptidyl peptidase 4                                                               | DPP4      | 424187 | NO  | YES | NO  |
| 448 | Dipeptidyl peptidase 7                                                               | DPP7      | 417297 | YES | YES | NO  |
| 449 | DNA damage inducible 1 homolog 2                                                     | DDI2      | 425541 | NO  | NO  | YES |
| 450 | DNA polymerase theta                                                                 | POLQ      | 418326 | YES | YES | NO  |
| 451 | DNA replication regulator and spliceosomal factor                                    | SMU1      | 427377 | YES | NO  | NO  |
| 452 | DNA topoisomerase I                                                                  | TOP1      | 396004 | YES | NO  | YES |
| 453 | DnaJ heat shock protein family (Hsp40) member B4                                     | DNAJB4    | 424550 | NO  | YES | NO  |
| 454 | DnaJ heat shock protein family (Hsp40) member C3                                     | DNAJC3    | 418787 | YES | YES | NO  |
| 455 | DnaJ heat shock protein family (Hsp40) member C7                                     | DNAJC7    | 428312 | YES | NO  | NO  |
| 456 | DnaJ heat shock protein family (Hsp40) member C9                                     | DNAJC9    | 423640 | YES | NO  | YES |
| 457 | DnaJ heat shock protein family (Hsp40) member C13                                    | DNAJC13   | 420688 | NO  | YES | NO  |
| 458 | Dolichyl-diphosphooligosaccharide--protein glycosyltransferase non-catalytic subunit | DDOST     | 425542 | YES | YES | YES |
| 459 | Drebrin like                                                                         | DBNL      | 425994 | NO  | NO  | YES |
| 460 | Dynactin subunit 1                                                                   | DCTN1     | 426238 | NO  | YES | YES |
| 461 | Dynactin subunit 2                                                                   | DCTN2     | 395587 | NO  | YES | YES |
| 462 | Dynactin subunit 3                                                                   | DCTN3     | 427404 | YES | YES | NO  |
| 463 | Dynactin subunit 4                                                                   | DCTN4     | 416269 | YES | NO  | NO  |
| 464 | Dynamamin 1                                                                          | DNM1      | 417217 | YES | NO  | NO  |
| 465 | Dynamamin 1 like                                                                     | DNM1L     | 418132 | YES | YES | NO  |
| 466 | Dynamamin 2-like                                                                     | LOC430067 | 430067 | YES | NO  | NO  |
| 467 | Dynamamin 3                                                                          | DNM3      | 424389 | NO  | YES | NO  |
| 468 | Dynein cytoplasmic 1 heavy chain 1                                                   | DYNC1H1   | 423461 | YES | YES | NO  |
| 469 | Dynein cytoplasmic 1 intermediate chain 2                                            | DYNC1I2   | 424151 | YES | YES | NO  |
| 470 | Dynein cytoplasmic 1 light intermediate chain 1                                      | DYNC1LI1  | 420668 | YES | YES | NO  |
| 471 | Dynein cytoplasmic 1 light intermediate chain 2                                      | DYNC1LI2  | 415793 | YES | YES | NO  |
| 472 | Dyskerin pseudouridine synthase 1                                                    | DKC1      | 422196 | YES | YES | NO  |
| 473 | Early endosome antigen 1                                                             | EEA1      | 417896 | NO  | YES | NO  |
| 474 | Echinoderm microtubule associated protein like 1                                     | EML1      | 423452 | YES | YES | YES |

|     |                                                               |         |           |     |     |     |
|-----|---------------------------------------------------------------|---------|-----------|-----|-----|-----|
| 475 | Ectonucleoside triphosphate diphosphohydrolase 1              | ENTPD1  | 423826    | YES | YES | YES |
| 476 | Ectonucleoside triphosphate diphosphohydrolase 5              | ENTPD5  | 423343    | NO  | NO  | YES |
| 477 | EGF like, fibronectin type III and laminin G domains          | EGFLAM  | 427445    | NO  | YES | NO  |
| 478 | EH domain containing 3                                        | EHD3    | 421306    | YES | YES | NO  |
| 479 | EH domain containing 4                                        | EHD4    | 100859860 | YES | NO  | YES |
| 480 | ELAV like RNA binding protein 1                               | ELAVL1  | 395637    | YES | YES | YES |
| 481 | Electron transfer flavoprotein dehydrogenase                  | ETFDH   | 428724    | YES | YES | NO  |
| 482 | Electron transfer flavoprotein, alpha subunit                 | ETFA    | 415353    | YES | YES | NO  |
| 483 | Elongation factor like GTPase 1                               | EFL1    | 415467    | NO  | NO  | YES |
| 484 | Elongation factor Tu GTP binding domain containing 2          | EFTUD2  | 428281    | YES | YES | NO  |
| 485 | ELOVL fatty acid elongase 1                                   | ELOVL1  | 424564    | YES | YES | NO  |
| 486 | EMAP like 4                                                   | EML4    | 771345    | YES | YES | NO  |
| 487 | EMG1, N1-specific pseudouridine methyltransferase             | EMG1    | 418292    | YES | NO  | NO  |
| 488 | ENAH actin regulator                                          | ENAH    | 374180    | YES | NO  | NO  |
| 489 | Endoglin                                                      | ENG     | 771557    | YES | YES | NO  |
| 490 | Endonuclease domain containing 1                              | ENDOD1  | 428090    | YES | YES | NO  |
| 491 | Endoplasmic reticulum aminopeptidase 1                        | ERAP1   | 427122    | YES | YES | NO  |
| 492 | Endoplasmic reticulum protein 29                              | ERP29   | 416882    | YES | YES | YES |
| 493 | Endoplasmic reticulum protein 44                              | ERP44   | 420994    | YES | YES | YES |
| 494 | Endoplasmic reticulum-golgi intermediate compartment 1        | ERGIC1  | 416205    | YES | YES | NO  |
| 495 | Enolase 1, (alpha)                                            | ENO1    | 396017    | YES | YES | YES |
| 496 | Enoyl-CoA delta isomerase 1                                   | ECI1    | 416657    | YES | YES | NO  |
| 497 | Enoyl-CoA hydratase 1                                         | ECH1    | 100858352 | YES | YES | NO  |
| 498 | Enoyl-CoA hydratase domain containing 2                       | ECHDC2  | 424646    | YES | YES | NO  |
| 499 | Enoyl-CoA hydratase, short chain 1                            | ECHS1   | 770828    | YES | YES | NO  |
| 500 | Envoplakin                                                    | EVPL    | 427805    | YES | YES | NO  |
| 501 | Epithelial cell adhesion molecule                             | EPCAM   | 421292    | YES | YES | NO  |
| 502 | Epoxide hydrolase 1-like                                      | EPHX1L  | 421447    | YES | YES | NO  |
| 503 | Epoxide hydrolase 2                                           | EPHX2   | 421999    | NO  | YES | NO  |
| 504 | ER lipid raft associated 1                                    | ERLIN1  | 423670    | YES | NO  | NO  |
| 505 | ER lipid raft associated 2                                    | ERLIN2  | 426769    | YES | YES | YES |
| 506 | ER membrane protein complex subunit 1                         | EMC1    | 419470    | YES | YES | NO  |
| 507 | ER membrane protein complex subunit 2                         | EMC2    | 420273    | YES | YES | NO  |
| 508 | ER membrane protein complex subunit 3                         | EMC3    | 415936    | YES | YES | NO  |
| 509 | ERI1 exoribonuclease family member 3                          | ERI3    | 424579    | YES | YES | NO  |
| 510 | Erythrocyte membrane protein band 4.1                         | EPB41   | 396493    | NO  | YES | YES |
| 511 | Erythrocyte membrane protein band 4.1 like 2                  | EPB41L2 | 421703    | YES | YES | NO  |
| 512 | Erythrocyte membrane protein band 4.2                         | EPB42   | 419216    | YES | YES | YES |
| 513 | Esterase D                                                    | ESD     | 418856    | YES | YES | YES |
| 514 | ETHE1, persulfide dioxygenase                                 | ETHE1   | 426450    | YES | YES | YES |
| 515 | Eukaryotic translation elongation factor 1 alpha 1            | EEF1A1  | 373963    | YES | YES | YES |
| 516 | Eukaryotic translation elongation factor 1 beta 2             | EEF1B2  | 395723    | YES | YES | YES |
| 517 | Eukaryotic translation elongation factor 1 delta              | EEF1D   | 107049004 | YES | YES | YES |
| 518 | Eukaryotic translation elongation factor 1 gamma              | EEF1G   | 100526660 | YES | YES | YES |
| 519 | Eukaryotic translation elongation factor 2                    | EEF2    | 396325    | YES | YES | YES |
| 520 | Eukaryotic translation initiation factor 1A domain containing | EIF1AD  | 414740    | YES | YES | NO  |
| 521 | Eukaryotic translation initiation factor 1A, X-linked         | EIF1AX  | 418606    | YES | YES | YES |
| 522 | Eukaryotic translation initiation factor 2 subunit alpha      | EIF2S1  | 423279    | YES | YES | YES |

|     |                                                           |              |           |     |     |     |
|-----|-----------------------------------------------------------|--------------|-----------|-----|-----|-----|
| 523 | Eukaryotic translation initiation factor 2 subunit beta   | EIF2S2       | 395295    | YES | YES | YES |
| 524 | Eukaryotic translation initiation factor 2 subunit gamma  | EIF2S3       | 418597    | YES | YES | YES |
| 525 | Eukaryotic translation initiation factor 2B subunit delta | EIF2B4       | 425800    | YES | YES | YES |
| 526 | Eukaryotic translation initiation factor 2D               | EIF2D        | 419845    | YES | YES | NO  |
| 527 | Eukaryotic translation initiation factor 3 subunit A      | EIF3A        | 423927    | YES | YES | YES |
| 528 | Eukaryotic translation initiation factor 3 subunit B      | EIF3B        | 769783    | YES | NO  | NO  |
| 529 | Eukaryotic translation initiation factor 3 subunit D      | EIF3D        | 771356    | YES | YES | YES |
| 530 | Eukaryotic translation initiation factor 3 subunit E      | EIF3E        | 420272    | YES | YES | YES |
| 531 | Eukaryotic translation initiation factor 3 subunit F      | EIF3F        | 423748    | YES | YES | YES |
| 532 | Eukaryotic translation initiation factor 3 subunit J      | EIF3J        | 415573    | YES | NO  | YES |
| 533 | Eukaryotic translation initiation factor 3 subunit L      | EIF3L        | 418033    | YES | NO  | NO  |
| 534 | Eukaryotic translation initiation factor 3 subunit M      | EIF3M        | 421602    | YES | YES | YES |
| 535 | Eukaryotic translation initiation factor 4 gamma 1        | EIF4G1       | 424953    | YES | YES | NO  |
| 536 | Eukaryotic translation initiation factor 4 gamma 2        | EIF4G2       | 395905    | YES | NO  | NO  |
| 537 | Eukaryotic translation initiation factor 4A2              | EIF4A2       | 395232    | YES | YES | YES |
| 538 | Eukaryotic translation initiation factor 4A3              | EIF4A3       | 416704    | YES | YES | YES |
| 539 | Eukaryotic translation initiation factor 4B               | EIF4B        | 100858349 | YES | NO  | NO  |
| 540 | Eukaryotic translation initiation factor 4E               | EIF4E        | 422703    | YES | YES | YES |
| 541 | Eukaryotic translation initiation factor 4H               | EIF4H        | 417490    | YES | YES | YES |
| 542 | Eukaryotic translation initiation factor 5                | EIF5         | 423479    | YES | YES | YES |
| 543 | Eukaryotic translation initiation factor 5A-1-like        | LOC107050352 | 107050352 | YES | YES | YES |
| 544 | eukaryotic translation initiation factor 5B               | EIF5B        | 395514    | NO  | YES | YES |
| 545 | Eukaryotic translation initiation factor 6                | EIF6         | 100550619 | YES | YES | YES |
| 546 | Eukaryotic translation termination factor 1               | ETF1         | 416182    | YES | YES | YES |
| 547 | Exportin 1                                                | XPO1         | 421192    | YES | YES | NO  |
| 548 | Exportin 7                                                | XPO7         | 426925    | YES | YES | YES |
| 549 | Extracellular fatty acid-binding protein                  | EXFABP       | 396393    | YES | YES | NO  |
| 550 | Ezrin                                                     | EZR          | 395701    | YES | YES | NO  |
| 551 | Family with sequence similarity 120C                      | FAM120C      | 415983    | YES | YES | NO  |
| 552 | Family with sequence similarity 129 member B              | FAM129B      | 771307    | YES | YES | NO  |
| 553 | Family with sequence similarity 175 member B              | FAM175B      | 423954    | YES | NO  | NO  |
| 554 | Family with sequence similarity 188 member A              | FAM188A      | 420526    | YES | YES | YES |
| 555 | Family with sequence similarity 213 member A              | FAM213A      | 423625    | YES | YES | NO  |
| 556 | Family with sequence similarity 49 member A               | FAM49A       | 421949    | YES | NO  | NO  |
| 557 | Family with sequence similarity 49 member B               | FAM49B       | 420330    | YES | YES | YES |
| 558 | Family with sequence similarity 96 member A               | FAM96A       | 415571    | NO  | NO  | YES |
| 559 | Far upstream element binding protein 1                    | FUBP1        | 424551    | YES | YES | YES |
| 560 | Far upstream element binding protein 3                    | FUBP3        | 417184    | YES | YES | NO  |
| 561 | Farnesyl diphosphate synthase                             | FDPS         | 425061    | YES | YES | YES |
| 562 | Fas associated factor family member 2                     | FAF2         | 416225    | YES | YES | NO  |
| 563 | Fas associated via death domain                           | FADD         | 423146    | YES | YES | YES |
| 564 | Fascin actin-bundling protein 1                           | FSCN1        | 416485    | YES | YES | NO  |
| 565 | Fatty acid binding protein 3                              | FABP3        | 419557    | YES | YES | NO  |
| 566 | Fatty acid binding protein 5                              | FABP5        | 420197    | YES | YES | NO  |
| 567 | Fatty acid synthase                                       | FASN         | 396061    | YES | YES | NO  |
| 568 | Fatty acid-binding protein 7                              | FABP7        | 396246    | YES | YES | NO  |
| 569 | F-box protein 3                                           | FBXO3        | 429495    | YES | NO  | YES |
| 570 | F-box protein 44                                          | FBXO44       | 419494    | NO  | YES | NO  |

|     |                                                       |           |        |     |     |     |
|-----|-------------------------------------------------------|-----------|--------|-----|-----|-----|
| 571 | FERM, ARH/RhoGEF and pleckstrin domain protein 1      | FARP1     | 418781 | YES | YES | NO  |
| 572 | Fermitin family member 2                              | FERMT2    | 423589 | YES | YES | NO  |
| 573 | Ferritin heavy chain 1                                | FBTH1     | 395970 | YES | YES | YES |
| 574 | Ferrochelatase                                        | FECH      | 374020 | YES | NO  | YES |
| 575 | Fetuin B                                              | FETUB     | 395404 | NO  | YES | YES |
| 576 | Fibrinogen alpha chain                                | FGA       | 396307 | NO  | YES | YES |
| 577 | Fibrinogen beta chain                                 | FGB       | 373926 | YES | YES | YES |
| 578 | Fibrinogen gamma chain                                | FGG       | 395837 | NO  | YES | YES |
| 579 | Fibrinogen-like protein 1-like                        | LOC430700 | 430700 | NO  | YES | NO  |
| 580 | Fibronectin 1                                         | FN1       | 396133 | YES | YES | YES |
| 581 | Fibulin 1                                             | FBLN1     | 373979 | YES | YES | NO  |
| 582 | Fibulin 2                                             | FBLN2     | 427583 | YES | YES | NO  |
| 583 | Filamin A                                             | FLNA      | 395261 | YES | YES | YES |
| 584 | Filamin B                                             | FLNB      | 378913 | YES | YES | YES |
| 585 | Filamin C                                             | FLNC      | 395260 | YES | YES | NO  |
| 586 | FK506 binding protein 3                               | FKBP3     | 395353 | YES | YES | YES |
| 587 | FK506 binding protein 4                               | FKBP4     | 418261 | YES | YES | YES |
| 588 | FK506 binding protein 5                               | FKBP5     | 421186 | NO  | YES | NO  |
| 589 | FK506 binding protein 9                               | FKBP9     | 395652 | YES | YES | NO  |
| 590 | FK506 binding protein 10                              | FKBP10    | 427013 | YES | YES | NO  |
| 591 | Flap structure-specific endonuclease 1                | FEN1      | 769677 | YES | YES | YES |
| 592 | Flavin containing monooxygenase 3                     | FMO3      | 395267 | YES | YES | NO  |
| 593 | Flotillin 2                                           | FLOT2     | 417579 | YES | YES | YES |
| 594 | Focadhesin                                            | FOCAD     | 427233 | NO  | YES | NO  |
| 595 | Fructose-bisphosphatase 1                             | FBP1      | 395218 | YES | YES | YES |
| 596 | Fumarate hydratase                                    | FH        | 420969 | YES | YES | NO  |
| 597 | Fumarylacetoacetate hydrolase domain containing 2A    | FAHD2A    | 426684 | YES | NO  | NO  |
| 598 | FUS RNA binding protein                               | FUS       | 414144 | NO  | NO  | YES |
| 599 | G protein pathway suppressor 1                        | GPS1      | 417382 | YES | NO  | YES |
| 600 | G protein subunit alpha 11                            | GNA11     | 374077 | YES | YES | NO  |
| 601 | G protein subunit alpha 14                            | GNA14     | 431611 | NO  | NO  | YES |
| 602 | G protein subunit alpha i2                            | GNAI2     | 396367 | YES | YES | NO  |
| 603 | G protein subunit alpha i3                            | GNAI3     | 374097 | YES | YES | NO  |
| 604 | G protein subunit alpha L                             | GNAL      | 474379 | NO  | NO  | YES |
| 605 | G protein subunit beta 1                              | GNB1      | 419402 | YES | YES | NO  |
| 606 | G protein subunit beta 4                              | GNB4      | 424974 | YES | YES | NO  |
| 607 | G3BP stress granule assembly factor 1                 | G3BP1     | 416265 | YES | NO  | YES |
| 608 | GA binding protein transcription factor alpha subunit | GABPA     | 418478 | YES | NO  | YES |
| 609 | Galactokinase 2                                       | GALK2     | 415596 | YES | YES | NO  |
| 610 | Galactosidase alpha                                   | GLA       | 422188 | NO  | YES | NO  |
| 611 | Galactosidase beta 1                                  | GLB1      | 420720 | YES | NO  | NO  |
| 612 | Galectin 1                                            | LGALS1    | 396491 | YES | YES | NO  |
| 613 | Galectin like                                         | LGALS1L   | 421278 | NO  | YES | NO  |
| 614 | GAR1 ribonucleoprotein                                | GAR1      | 422697 | YES | NO  | NO  |
| 615 | GC, vitamin D binding protein                         | GC        | 395696 | YES | YES | YES |
| 616 | GCN1, eIF2 alpha kinase activator homolog             | GCN1      | 416982 | YES | YES | NO  |
| 617 | GDP dissociation inhibitor 1                          | GDI1      | 395854 | YES | YES | YES |
| 618 | GDP-mannose pyrophosphorylase A                       | GMPPA     | 769292 | YES | YES | NO  |

|     |                                                                                  |           |           |     |     |     |
|-----|----------------------------------------------------------------------------------|-----------|-----------|-----|-----|-----|
| 619 | GDP-mannose pyrophosphorylase B                                                  | GMPPB     | 415924    | YES | YES | YES |
| 620 | Gelsolin                                                                         | GSN       | 395774    | YES | YES | YES |
| 621 | Geranylgeranyl diphosphate synthase 1                                            | GGPS1     | 427092    | YES | NO  | NO  |
| 622 | Glactosidase beta 1                                                              | GLB1      | 420720    | NO  | YES | NO  |
| 623 | GLG1 golgi glycoprotein 1                                                        | GLG1      | 396492    | YES | NO  | NO  |
| 624 | GLI pathogenesis related 2                                                       | GLIPR2    | 420999    | YES | YES | YES |
| 625 | Glucosamine-6-phosphate deaminase 1                                              | GNPDA1    | 416341    | YES | YES | NO  |
| 626 | Glucosamine-6-phosphate deaminase 2                                              | GNPDA2    | 422772    | NO  | YES | NO  |
| 627 | Glucosamine-phosphate N-acetyltransferase 1                                      | GNPNAT1   | 423588    | NO  | YES | NO  |
| 628 | Glucose-6-phosphate dehydrogenase                                                | G6PD      | 112530318 | YES | YES | YES |
| 629 | Glucose-6-phosphate isomerase                                                    | GPI       | 415783    | YES | YES | YES |
| 630 | Glutamate dehydrogenase 2                                                        | GLUD2     | 423612    | YES | YES | NO  |
| 631 | Glutamate-cysteine ligase catalytic subunit                                      | GCLC      | 421894    | NO  | YES | YES |
| 632 | Glutamate-cysteine ligase modifier subunit                                       | GCLM      | 424492    | YES | YES | YES |
| 633 | Glutamic-oxaloacetic transaminase 1                                              | GOT1      | 396261    | YES | YES | YES |
| 634 | Glutamic-oxaloacetic transaminase 2                                              | GOT2      | 396533    | YES | YES | YES |
| 635 | Glutamine amidotransferase like class 1 domain containing 3A                     | GATD3A    | 418552    | YES | YES | NO  |
| 636 | Glutamine synthetase-like                                                        | GSL       | 417253    | NO  | NO  | YES |
| 637 | Glutamine-fructose-6-phosphate transaminase 1                                    | GFPT1     | 419514    | YES | YES | NO  |
| 638 | Glutamine-fructose-6-phosphate transaminase 2                                    | GFPT2     | 426962    | YES | NO  | NO  |
| 639 | Glutaminyl-tRNA synthetase                                                       | QARS      | 416057    | YES | YES | YES |
| 640 | Glutamyl-prolyl-tRNA synthetase                                                  | EPRS      | 421348    | YES | YES | YES |
| 641 | Glutamyl-tRNA amidotransferase subunit B                                         | GATB      | 422480    | YES | NO  | NO  |
| 642 | Glutaredoxin                                                                     | GLRX      | 396069    | NO  | NO  | YES |
| 643 | Glutaredoxin 3                                                                   | GLRX3     | 423968    | YES | YES | YES |
| 644 | Glutathione peroxidase 1                                                         | GPX1      | 100857115 | YES | YES | YES |
| 645 | Glutathione peroxidase 3                                                         | GPX3      | 427638    | NO  | YES | YES |
| 646 | Glutathione peroxidase 4                                                         | GPX4      | 374056    | YES | YES | YES |
| 647 | Glutathione peroxidase 7                                                         | GPX7      | 424643    | YES | YES | NO  |
| 648 | Glutathione S-transferase alpha 2                                                | GSTA2     | 414895    | YES | YES | NO  |
| 649 | Glutathione S-transferase alpha 3                                                | GSTA3     | 414896    | YES | YES | YES |
| 650 | Glutathione S-transferase alpha 4                                                | GSTA4     | 395612    | YES | YES | YES |
| 651 | Glutathione S-transferase class-alpha                                            | LOC395611 | 395611    | YES | YES | NO  |
| 652 | Glutathione S-transferase kappa 1                                                | GSTK1     | 418302    | YES | YES | NO  |
| 653 | Glutathione S-transferase mu 2 (muscle)                                          | GSTM2     | 395976    | YES | YES | YES |
| 654 | Glutathione S-transferase omega 2                                                | GSTO2     | 423881    | YES | YES | YES |
| 655 | Glutathione S-transferase theta 1-like                                           | GSTT1L    | 769847    | YES | YES | NO  |
| 656 | Glutathione synthetase                                                           | GSS       | 428135    | YES | YES | YES |
| 657 | Glutathione transferase                                                          | LOC396380 | 396380    | YES | YES | NO  |
| 658 | Glutathione-disulfide reductase                                                  | GSR       | 771783    | YES | YES | NO  |
| 659 | Glyceraldehyde-3-phosphate dehydrogenase                                         | GAPDH     | 374193    | YES | YES | YES |
| 660 | Glycerol-3-phosphate dehydrogenase 1-like                                        | GDDL1     | 420664    | YES | YES | YES |
| 661 | Glycerophosphocholine phosphodiesterase 1                                        | GPCPD1    | 421311    | NO  | NO  | YES |
| 662 | Glycerophosphodiester phosphodiesterase domain containing 2                      | GDPD2     | 422217    | NO  | YES | NO  |
| 663 | Glycine C-acetyltransferase                                                      | GCAT      | 101750333 | YES | YES | NO  |
| 664 | Glycogen synthase kinase 3 alpha                                                 | GSK3A     | 418335    | YES | YES | NO  |
| 665 | Glycogenin 1                                                                     | GYG1      | 425050    | NO  | NO  | YES |
| 666 | Glycosylphosphatidylinositol anchored high density lipoprotein binding protein 1 | GPIHBP1   | 420302    | NO  | YES | NO  |

|     |                                                               |              |           |     |     |     |
|-----|---------------------------------------------------------------|--------------|-----------|-----|-----|-----|
| 667 | Glycyl-tRNA synthetase                                        | GARS         | 428403    | YES | YES | NO  |
| 668 | Glyoxalase domain containing 4                                | GLOD4        | 101750166 | YES | YES | YES |
| 669 | Glyoxalase I                                                  | GLO1         | 421428    | YES | YES | YES |
| 670 | Glypican 4                                                    | GPC4         | 422234    | YES | YES | NO  |
| 671 | GNAS complex locus                                            | GNAS         | 419313    | YES | YES | NO  |
| 672 | Golgi glycoprotein 1                                          | GLG1         | 396492    | NO  | YES | NO  |
| 673 | Golgi membrane protein 1                                      | GOLM1        | 427462    | YES | YES | NO  |
| 674 | Golgin A2                                                     | GOLGA2       | 427766    | YES | NO  | NO  |
| 675 | Golgin B1                                                     | GOLGB1       | 426868    | NO  | YES | NO  |
| 676 | GRIP and coiled-coil domain containing 2                      | GCC2         | 428014    | YES | NO  | NO  |
| 677 | Growth factor receptor bound protein 2                        | GRB2         | 386572    | YES | NO  | NO  |
| 678 | Growth hormone inducible transmembrane protein                | GHITM        | 423621    | YES | YES | NO  |
| 679 | GrpE like 1, mitochondrial                                    | GRPEL1       | 422865    | YES | YES | NO  |
| 680 | GTPase IMAP family member 7-like                              | LOC112529948 | 112529948 | YES | YES | YES |
| 681 | GTPase IMAP family member 8-like                              | LOC420368    | 420368    | NO  | YES | YES |
| 682 | Guanine monophosphate synthase                                | GMPS         | 425028    | YES | YES | NO  |
| 683 | Guanosine monophosphate reductase 2                           | GMPR2        | 420842    | NO  | NO  | YES |
| 684 | GULP PTB domain containing engulfment adaptor 1               | GULP1        | 423988    | NO  | YES | NO  |
| 685 | H1 histone family member X                                    | H1FX         | 107054440 | YES | NO  | YES |
| 686 | H1 histone family, member 0                                   | H1F0         | 693250    | YES | YES | YES |
| 687 | H2A histone family, member Y                                  | H2AFY        | 395858    | YES | NO  | NO  |
| 688 | H2A.Z variant histone 2                                       | H2AZ2        | 426617    | YES | NO  | YES |
| 689 | Haloacid dehalogenase like hydrolase domain containing 2      | HDHD2        | 416385    | YES | YES | NO  |
| 690 | Heat shock 70kDa protein 2                                    | HSPA2        | 423504    | YES | YES | YES |
| 691 | Heat shock 70kDa protein 5 (glucose-regulated protein, 78kDa) | HSPA5        | 396487    | YES | YES | YES |
| 692 | Heat shock 70kDa protein 8                                    | HSPA8        | 395853    | YES | YES | YES |
| 693 | Heat shock protein 90 alpha family class A member 1           | HSP90AA1     | 423463    | YES | YES | YES |
| 694 | Heat shock protein 90 alpha family class B member 1           | HSP90AB1     | 396188    | YES | YES | NO  |
| 695 | Heat shock protein 90 beta family member 1                    | HSP90B1      | 374163    | YES | YES | NO  |
| 696 | Heat shock protein family A (Hsp70) member 4                  | HSPA4        | 416339    | YES | YES | YES |
| 697 | heat shock protein family A (Hsp70) member 4 like             | HSP4AL       | 422496    | YES | YES | YES |
| 698 | Heat shock protein family A (Hsp70) member 9                  | HSPA9        | 416183    | YES | YES | YES |
| 699 | Heat shock protein family B (small) member 1                  | HSPB1        | 396227    | YES | YES | NO  |
| 700 | Heat shock protein family D (Hsp60) member 1                  | HSPD1        | 424059    | YES | YES | YES |
| 701 | Heat shock protein family E (Hsp10) member 1                  | HSPE1        | 395948    | NO  | NO  | YES |
| 702 | Hematological and neurological expressed 1 like               | HN1L         | 416763    | NO  | YES | NO  |
| 703 | Hematopoietic prostaglandin D synthase                        | HPGDS        | 395863    | YES | YES | YES |
| 704 | Heme binding protein 1                                        | HEBP1        | 417961    | YES | YES | YES |
| 705 | Heme oxygenase 2                                              | HMOX2        | 416663    | YES | YES | NO  |
| 706 | Hemoglobin beta, subunit A                                    | HBBA         | 396485    | YES | YES | YES |
| 707 | Hemoglobin beta, subunit rho                                  | HBBR         | 419079    | YES | YES | YES |
| 708 | Hemoglobin subunit alpha 1                                    | HBA1         | 416652    | YES | YES | YES |
| 709 | Hemoglobin subunit D                                          | HBAD         | 416651    | YES | YES | YES |
| 710 | Hemoglobin subunit epsilon                                    | HBE          | 107049060 | YES | YES | YES |
| 711 | Hemoglobin subunit epsilon 1                                  | HBE1         | 428114    | YES | YES | YES |
| 712 | Hemoglobin subunit mu                                         | HBM          | 416651    | YES | NO  | YES |
| 713 | Hemoglobin subunit zeta                                       | HBZ          | 416650    | YES | YES | YES |
| 714 | Heparan sulfate proteoglycan 2                                | HSPG2        | 429806    | YES | YES | NO  |

|     |                                                                                      |            |           |     |     |     |
|-----|--------------------------------------------------------------------------------------|------------|-----------|-----|-----|-----|
| 715 | Hepatoma-derived growth factor                                                       | HDGF       | 776936    | YES | YES | YES |
| 716 | Heterochromatin protein 1 binding protein 3                                          | HP1BP3     | 425543    | YES | NO  | YES |
| 717 | Heterogeneous nuclear ribonucleoprotein A1                                           | HNRNPA1    | 424136    | YES | YES | YES |
| 718 | Heterogeneous nuclear ribonucleoprotein A/B                                          | HNRNPAB    | 396268    | YES | YES | YES |
| 719 | Heterogeneous nuclear ribonucleoprotein A2/B1                                        | HNRNPA2B1  | 420627    | YES | YES | YES |
| 720 | Heterogeneous nuclear ribonucleoprotein A3                                           | HNRNPA3    | 100859627 | YES | YES | YES |
| 721 | Heterogeneous nuclear ribonucleoprotein D                                            | HNRNPD     | 422602    | YES | YES | YES |
| 722 | Heterogeneous nuclear ribonucleoprotein D like                                       | HNRNPDL    | 422601    | NO  | NO  | YES |
| 723 | Heterogeneous nuclear ribonucleoprotein H1                                           | HNRNPH2    | 395157    | YES | YES | YES |
| 724 | Heterogeneous nuclear ribonucleoprotein H3                                           | HNRNPH3    | 423686    | YES | YES | YES |
| 725 | Heterogeneous nuclear ribonucleoprotein K                                            | HNRNPK     | 427458    | YES | NO  | NO  |
| 726 | Heterogeneous nuclear ribonucleoprotein K like                                       | HNRNPKL    | 426516    | NO  | YES | YES |
| 727 | Heterogeneous nuclear ribonucleoprotein L                                            | HNRNPL     | 101749377 | YES | NO  | NO  |
| 728 | Heterogeneous nuclear ribonucleoprotein M                                            | HNRNPM     | 420054    | YES | YES | YES |
| 729 | Heterogeneous nuclear ribonucleoprotein R                                            | HNRNPR     | 419570    | YES | YES | YES |
| 730 | Heterogeneous nuclear ribonucleoprotein U                                            | HNRNPU     | 421492    | YES | YES | YES |
| 731 | Heterogeneous nuclear ribonucleoprotein U like 2                                     | HNRNPUL2   | 395763    | YES | YES | YES |
| 732 | Hexokinase 1                                                                         | HK1        | 373889    | YES | YES | NO  |
| 733 | Hexokinase 2                                                                         | HK2        | 374044    | YES | YES | YES |
| 734 | Hexosaminidase subunit beta                                                          | HEXB       | 427204    | YES | YES | NO  |
| 735 | High density lipoprotein binding protein                                             | HDLBP      | 395984    | YES | YES | NO  |
| 736 | High mobility group box 1                                                            | HMGB1      | 395724    | YES | YES | YES |
| 737 | High mobility group box 2                                                            | HMGB2      | 396482    | YES | YES | YES |
| 738 | High mobility group box 3                                                            | HMGB3      | 396232    | NO  | YES | YES |
| 739 | Hikeshi, heat shock protein nuclear import factor                                    | HIKESHI    | 427034    | YES | YES | NO  |
| 740 | Histamine N-methyltransferase                                                        | HNMT       | 424298    | NO  | YES | NO  |
| 741 | Histidine triad nucleotide binding protein 1                                         | HINT1      | 100859112 | NO  | YES | NO  |
| 742 | Histidine triad nucleotide binding protein 2                                         | HINT2      | 395424    | YES | YES | NO  |
| 743 | Histidyl-tRNA synthetase                                                             | HARS       | 416132    | YES | YES | NO  |
| 744 | Histocompatibility minor 13                                                          | HM13       | 100859573 | YES | NO  | NO  |
| 745 | Histone cluster 1, H1.03                                                             | HIST1H103  | 100858354 | NO  | NO  | YES |
| 746 | Histone cluster 1, H1.11L (similar to human histone cluster 1, class H1 genes)       | HIST1H111L | 427892    | YES | NO  | YES |
| 747 | Histone cluster 1, H1.11R                                                            | HIST1H111R | 427896    | YES | YES | YES |
| 748 | Histone cluster 1, H2A, IV                                                           | HIST1H2A4  | 404299    | NO  | YES | YES |
| 749 | Histone cluster 1, H2bo                                                              | HIST1H2BO  | 100858607 | YES | YES | NO  |
| 750 | Histone cluster 1, H2B-VII (similar to human histone cluster 1, class H2B, member N) | HIST1H2B7  | 417956    | NO  | NO  | YES |
| 751 | Histone cluster 1, H2B-VIII                                                          | HIST1H2B8  | 427886    | YES | YES | YES |
| 752 | Histone cluster 1, H4b                                                               | HIST1H4B   | 770005    | YES | NO  | NO  |
| 753 | Histone cluster 2, H4b                                                               | HIST2H4B   | 417950    | YES | YES | YES |
| 754 | Histone deacetylase 1                                                                | HDAC1      | 373961    | YES | YES | NO  |
| 755 | Histone H2A-IV-like 2                                                                | HISTH2A4L2 | 101750582 | YES | NO  | NO  |
| 756 | Histone H3.2-like                                                                    | LOC769852  | 769852    | YES | YES | YES |
| 757 | Histone PARylation factor 1                                                          | HPF1       | 422431    | NO  | NO  | YES |
| 758 | Homer scaffolding protein 3                                                          | HOMER3     | 420115    | NO  | NO  | YES |
| 759 | Hook microtubule tethering protein 3                                                 | HOOK3      | 427297    | YES | YES | NO  |
| 760 | HRas proto-oncogene, GTPase                                                          | HRAS       | 396229    | YES | YES | NO  |
| 761 | HSPA (Hsp70) binding protein 1                                                       | HSPBP1     | 100858988 | YES | YES | YES |
| 762 | Hydroxyacid oxidase 2                                                                | HAO2       | 418311    | NO  | NO  | YES |



|     |                                                                                                                  |           |           |     |     |     |
|-----|------------------------------------------------------------------------------------------------------------------|-----------|-----------|-----|-----|-----|
| 763 | Hydroxyacyl-CoA dehydrogenase                                                                                    | HADH      | 420290    | YES | YES | NO  |
| 764 | Hydroxyacyl-CoA dehydrogenase/3-ketoacyl-CoA thiolase/enoyl-CoA hydratase (trifunctional protein), alpha subunit | HADHA     | 395929    | YES | YES | NO  |
| 765 | Hydroxyacylglutathione hydrolase                                                                                 | HAGH      | 416537    | YES | YES | YES |
| 766 | Hydroxymethylbilane synthase                                                                                     | HMBS      | 419701    | YES | YES | YES |
| 767 | Hydroxyprostaglandin dehydrogenase 15-(NAD)                                                                      | HPGD      | 422567    | NO  | YES | NO  |
| 768 | Hydroxypyruvate isomerase (putative)                                                                             | HYI       | 424567    | YES | YES | NO  |
| 769 | Hydroxysteroid (11-beta) dehydrogenase 1a                                                                        | HSD11B1A  | 771930    | YES | YES | NO  |
| 770 | Hydroxysteroid 17-beta dehydrogenase 4                                                                           | HSD17B4   | 395785    | YES | YES | NO  |
| 771 | Hydroxysteroid (17-beta) dehydrogenase 10                                                                        | HSD17B10  | 425758    | YES | YES | NO  |
| 772 | Hydroxysteroid (17-beta) dehydrogenase 12                                                                        | HSD17B12  | 769787    | YES | YES | NO  |
| 773 | Hydroxysteroid dehydrogenase like 2                                                                              | HSDL2     | 100858057 | YES | YES | NO  |
| 774 | Hypoxanthine phosphoribosyltransferase 1                                                                         | HPRT1     | 395653    | YES | YES | NO  |
| 775 | Hypoxia up-regulated 1                                                                                           | HYOU1     | 428251    | YES | YES | NO  |
| 776 | IgGfc-binding protein-like                                                                                       | LOC429249 | 429249    | NO  | YES | YES |
| 777 | Immunoglobulin alpha heavy chain                                                                                 | N/A       | N/A       | YES | YES | NO  |
| 778 | Immunoglobulin lambda-like polypeptide 1                                                                         | IGLL1     | 416928    | NO  | NO  | YES |
| 779 | Immunoglobulin superfamily member 9                                                                              | IGSF9     | 425454    | YES | YES | YES |
| 780 | Importin 5                                                                                                       | IPO5      | 418783    | YES | YES | YES |
| 781 | Importin 7                                                                                                       | IPO7      | 423046    | YES | YES | NO  |
| 782 | Importin 9                                                                                                       | IPO9      | 421167    | NO  | YES | NO  |
| 783 | Inner membrane mitochondrial protein                                                                             | IMMT      | 422912    | YES | YES | NO  |
| 784 | Inosine monophosphate dehydrogenase 2                                                                            | IMPDH2    | 416058    | YES | YES | NO  |
| 785 | Inosine triphosphatase                                                                                           | ITPA      | 424390    | NO  | YES | NO  |
| 786 | Inositol 1,4,5-trisphosphate receptor type 2                                                                     | ITPR2     | 418212    | NO  | YES | NO  |
| 787 | Inositol 1,4,5-trisphosphate receptor type 3                                                                     | ITPR3     | 419910    | NO  | YES | NO  |
| 788 | Inositol monophosphatase 1                                                                                       | IMPA1     | 420199    | NO  | YES | YES |
| 789 | Insulin degrading enzyme                                                                                         | IDE       | 423814    | YES | NO  | YES |
| 790 | Insulin like growth factor 2 mRNA binding protein 1                                                              | IGF2BP1   | 395953    | YES | YES | NO  |
| 791 | Insulin like growth factor 2 mRNA binding protein 3                                                              | IGF2BP3   | 420617    | YES | YES | NO  |
| 792 | Insulin like growth factor 2 receptor                                                                            | IGF2R     | 395817    | NO  | YES | NO  |
| 793 | Insulin like growth factor binding protein 7                                                                     | IGFBP7    | 422620    | YES | YES | NO  |
| 794 | Integrin alpha 5                                                                                                 | N/A       | N/A       | NO  | YES | NO  |
| 795 | Integrin linked kinase                                                                                           | ILK       | 374018    | YES | YES | NO  |
| 796 | Integrin subunit alpha 1                                                                                         | ITGA1     | 395951    | YES | YES | NO  |
| 797 | Integrin subunit alpha 3                                                                                         | ITGA3     | 373946    | YES | YES | NO  |
| 798 | Integrin subunit alpha 6                                                                                         | ITGA6     | 396226    | YES | YES | NO  |
| 799 | Integrin subunit alpha 8                                                                                         | ITGA8     | 396225    | YES | YES | NO  |
| 800 | Integrin subunit alpha 9                                                                                         | ITGA9     | 420757    | NO  | YES | NO  |
| 801 | Integrin subunit alpha-V                                                                                         | ITGAV     | 396420    | YES | YES | NO  |
| 802 | Integrin subunit beta 1                                                                                          | ITGB1     | 374058    | YES | YES | NO  |
| 803 | Integrin subunit beta 3                                                                                          | ITGB3     | 374209    | YES | YES | NO  |
| 804 | Integrin subunit beta 4                                                                                          | ITGB4     | 417374    | YES | YES | NO  |
| 805 | Inter-alpha-trypsin inhibitor heavy chain 2                                                                      | ITI2      | 419110    | NO  | NO  | YES |
| 806 | Interferon regulatory factor 2 binding protein-like                                                              | C5H14orf4 | 429422    | YES | NO  | NO  |
| 807 | Interleukin enhancer binding factor 2                                                                            | ILF2      | 425709    | YES | YES | NO  |
| 808 | Interleukin enhancer binding factor 3                                                                            | ILF3      | 100858655 | YES | YES | NO  |
| 809 | IQ motif containing GTPase activating protein 2                                                                  | IQGAP2    | 427211    | YES | YES | NO  |

|     |                                                     |              |           |     |     |     |
|-----|-----------------------------------------------------|--------------|-----------|-----|-----|-----|
| 810 | IQ motif containing GTPase activating protein 3     | IQGAP3       | 415591    | YES | YES | YES |
| 811 | Isoamyl acetate-hydrolyzing esterase 1 homolog      | IAH1         | 421930    | YES | YES | NO  |
| 812 | Isochorismatase domain containing 1                 | ISOC1        | 415601    | YES | YES | YES |
| 813 | Isocitrate dehydrogenase (NADP(+)) 1, cytosolic     | IDH1         | 424112    | YES | YES | YES |
| 814 | Isocitrate dehydrogenase (NADP(+)) 2, mitochondrial | IDH2         | 431056    | YES | YES | YES |
| 815 | Isocitrate dehydrogenase 3 (NAD(+)) alpha           | IDH3A        | 415362    | YES | YES | NO  |
| 816 | Isoleucyl-tRNA synthetase                           | IARS         | 415957    | YES | YES | YES |
| 817 | Isoleucyl-tRNA synthetase 2, mitochondrial          | IARS2        | 421346    | YES | YES | NO  |
| 818 | Junction plakoglobin                                | JUP          | 429710    | YES | YES | NO  |
| 819 | Karyopherin subunit alpha 3                         | KPNA3        | 418870    | YES | NO  | NO  |
| 820 | Karyopherin subunit alpha 4                         | KPNA4        | 425012    | YES | YES | NO  |
| 821 | Karyopherin subunit beta 1                          | KPNB1        | 426499    | YES | YES | YES |
| 822 | KDEL motif containing 1                             | KDEL1        | 418766    | YES | NO  | NO  |
| 823 | Keratin 5                                           | KRT5         | 407779    | NO  | NO  | YES |
| 824 | Keratin 6A                                          | KRT6A        | 408041    | NO  | YES | YES |
| 825 | Keratin 7                                           | KRT7         | 395772    | YES | YES | NO  |
| 826 | Keratin 8                                           | KRT8         | 426896    | YES | YES | YES |
| 827 | Keratin 13                                          | KRT13        | 408040    | YES | YES | YES |
| 828 | Keratin 14                                          | KRT14        | 408039    | YES | YES | NO  |
| 829 | Keratin 17                                          | KRT17        | 100858439 | YES | YES | NO  |
| 830 | Keratin 18                                          | KRT18        | 101749333 | YES | YES | NO  |
| 831 | Keratin 24                                          | KRT24        | 395861    | YES | YES | YES |
| 832 | Keratin 40                                          | KRT40        | 420045    | NO  | YES | YES |
| 833 | Keratin, type II cytoskeletal 4-like                | LOC112529929 | 112529929 | NO  | YES | NO  |
| 834 | KH-type splicing regulatory protein                 | KHSRP        | 374140    | YES | YES | YES |
| 835 | KIAA1671                                            | KIAA1671     | 768701    | NO  | NO  | YES |
| 836 | Kinectin 1                                          | KTN1         | 396335    | YES | YES | NO  |
| 837 | Kinesin family member 5B                            | KIF5B        | 420472    | YES | YES | NO  |
| 838 | kinesin light chain 1                               | KLC1         | 423484    | YES | NO  | NO  |
| 839 | Kinesin light chain 2                               | KLC2         | 769965    | YES | NO  | NO  |
| 840 | Kininogen 1                                         | KNG1         | 424957    | NO  | NO  | YES |
| 841 | Lactate dehydrogenase A                             | LDHA         | 396221    | YES | YES | YES |
| 842 | Lactate dehydrogenase B                             | LDHB         | 373997    | YES | YES | YES |
| 843 | Lamin A/C                                           | LMNA         | 396224    | YES | YES | YES |
| 844 | Lamin B receptor                                    | LBR          | 396285    | YES | NO  | YES |
| 845 | Lamin B1                                            | LMNB1        | 396223    | YES | YES | YES |
| 846 | Lamin B2                                            | LMNB2        | 396222    | YES | YES | YES |
| 847 | Laminin subunit alpha 1                             | LAMA1        | 374016    | YES | YES | NO  |
| 848 | Laminin subunit alpha 5                             | LAMA5        | 428148    | YES | YES | NO  |
| 849 | Laminin subunit beta 1                              | LAMB1        | 396478    | YES | YES | NO  |
| 850 | Laminin subunit gamma 1                             | LAMC1        | 424442    | YES | YES | NO  |
| 851 | Laminin, beta 2 (laminin S)                         | LAMB2        | 373980    | NO  | YES | NO  |
| 852 | LanC like 1                                         | LANCL1       | 424006    | YES | YES | YES |
| 853 | Lanosterol synthase                                 | LSS          | 424037    | YES | NO  | NO  |
| 854 | Lecithin-cholesterol acyltransferase                | LCAT         | 396136    | NO  | NO  | YES |
| 855 | Lectin, galactoside-binding, soluble, 3             | LGALS3       | 373917    | NO  | YES | NO  |
| 856 | Lectin, mannose binding 1 like                      | LMAN1L       | 426849    | YES | YES | NO  |
| 857 | Lectin, mannose binding 2                           | LMAN2        | 100859676 | YES | YES | YES |

|     |                                                                          |          |           |     |     |     |
|-----|--------------------------------------------------------------------------|----------|-----------|-----|-----|-----|
| 858 | Legumain                                                                 | LGMN     | 423418    | YES | NO  | NO  |
| 859 | Leucine aminopeptidase 3                                                 | LAP3     | 425306    | YES | YES | NO  |
| 860 | Leucine rich pentatricopeptide repeat containing                         | LRPPRC   | 421403    | YES | YES | NO  |
| 861 | Leucine rich repeat containing 1                                         | LRRRC1   | 421891    | YES | NO  | NO  |
| 862 | Leucine rich repeat containing 15                                        | LRRRC15  | 768899    | YES | YES | YES |
| 863 | Leucine rich repeat containing 40                                        | LRRRC40  | 424713    | YES | NO  | YES |
| 864 | Leucine rich repeat containing 57                                        | LRRRC57  | 423236    | YES | NO  | NO  |
| 865 | Leucine zipper and CTNNBIP1 domain containing                            | LZIC     | 419445    | YES | YES | NO  |
| 866 | Leucyl-tRNA synthetase                                                   | LARS     | 416347    | YES | YES | YES |
| 867 | Leukocyte cell derived chemotaxin 2                                      | LECT2    | 396471    | YES | YES | YES |
| 868 | Leukocyte ribonuclease A-2                                               | RSFR     | 423668    | NO  | YES | NO  |
| 869 | Leukotriene A4 hydrolase                                                 | LTA4H    | 417918    | YES | YES | YES |
| 870 | LIM and calponin homology domains 1                                      | LIMCH1   | 422780    | YES | NO  | NO  |
| 871 | LIM and SH3 protein 1                                                    | LASP1    | 420002    | YES | YES | NO  |
| 872 | LIM domain and actin binding 1                                           | LIMA1    | 426878    | YES | YES | NO  |
| 873 | LIM domain containing preferred translocation partner in lipoma          | LPP      | 429148    | YES | YES | NO  |
| 874 | LIM zinc finger domain containing 1                                      | LIMS1    | 414880    | NO  | YES | NO  |
| 875 | Lin-7 homolog C, crumbs cell polarity complex component                  | LIN7C    | 421608    | YES | YES | YES |
| 876 | Lipase maturation factor 2                                               | LMF2     | 429380    | YES | NO  | NO  |
| 877 | Ion peptidase 1, mitochondrial                                           | LONP1    | 768942    | YES | YES | NO  |
| 878 | LSM3 homolog, U6 small nuclear RNA and mRNA degradation associated       | LSM3     | 416040    | YES | YES | NO  |
| 879 | LSM6 homolog, U6 small nuclear RNA and mRNA degradation associated       | LSM6     | 422466    | NO  | NO  | YES |
| 880 | Lumican                                                                  | LUM      | 417891    | YES | YES | YES |
| 881 | Lymphocyte antigen 86                                                    | LY86     | 420872    | NO  | YES | NO  |
| 882 | Lymphocyte cytosolic protein 1                                           | LCP1     | 418852    | YES | YES | NO  |
| 883 | Lymphocyte-specific protein 1 pseudogene 1                               | LSP1P1   | 374254    | YES | NO  | NO  |
| 884 | Lysine demethylase 1A                                                    | KDM1A    | 419571    | YES | NO  | NO  |
| 885 | Lysophospholipase 2                                                      | LYPLA2   | 419685    | YES | YES | NO  |
| 886 | Lysozyme (renal amyloidosis)                                             | LYZ      | 396218    | YES | YES | YES |
| 887 | Lysozyme g2                                                              | LYG2     | 395708    | YES | YES | YES |
| 888 | Lysyl-tRNA synthetase                                                    | KARS     | 415885    | YES | YES | YES |
| 889 | Macrophage migration inhibitory factor (glycosylation-inhibiting factor) | MIF      | 100857237 | NO  | YES | NO  |
| 890 | Macrophage stimulating 1 (hepatocyte growth factor-like)                 | MST1     | 396135    | YES | YES | NO  |
| 891 | Mago homolog, exon junction complex core component                       | MAGOH    | 374226    | YES | YES | YES |
| 892 | Major vault protein                                                      | MVP      | 420049    | YES | YES | NO  |
| 893 | Malate dehydrogenase 1                                                   | MDH1     | 421281    | YES | YES | YES |
| 894 | Malate dehydrogenase 2                                                   | MDH2     | 417517    | YES | YES | YES |
| 895 | Mannose phosphate isomerase                                              | MPI      | 769765    | YES | YES | YES |
| 896 | Mannose receptor C type 1                                                | MRC1     | 420516    | NO  | YES | NO  |
| 897 | Mannose receptor C type 2                                                | MRC2     | 419950    | YES | YES | NO  |
| 898 | MARCKS like 1                                                            | MARCKSL1 | 770764    | YES | YES | NO  |
| 899 | Matrin 3                                                                 | MATR3    | 373948    | YES | YES | NO  |
| 900 | Matrix metallopeptidase 2                                                | MMP2     | 386583    | YES | YES | NO  |
| 901 | Matrix remodeling associated 7                                           | MXRA7    | 769894    | YES | YES | NO  |
| 902 | Mediator of cell motility 1                                              | MEMO1    | 421483    | YES | NO  | NO  |
| 903 | Melanoma cell adhesion molecule                                          | MCAM     | 448832    | YES | YES | NO  |
| 904 | Membrane palmitoylated protein 6                                         | MPP6     | 420622    | NO  | NO  | YES |
| 905 | Mercaptopyruvate sulfurtransferase                                       | MPST     | 418048    | YES | YES | YES |

|     |                                                                                                 |              |                        |     |     |     |
|-----|-------------------------------------------------------------------------------------------------|--------------|------------------------|-----|-----|-----|
| 906 | Mesoderm development candidate 2                                                                | MESDC2       | 415475                 | YES | YES | NO  |
| 907 | Mesothelin                                                                                      | MSLN         | 416534                 | NO  | YES | NO  |
| 908 | Metastasis associated 1 family member 2                                                         | MTA2         | 101747888              | YES | NO  | NO  |
| 909 | Metastasis associated 1 family member 3                                                         | MTA3         | 421395                 | YES | NO  | NO  |
| 910 | Methionine adenosyltransferase 1A                                                               | MAT1A        | 423628                 | YES | NO  | NO  |
| 911 | Methionyl aminopeptidase 2                                                                      | METAP2       | 417912                 | YES | YES | NO  |
| 912 | Methylcrotonoyl-CoA carboxylase 2                                                               | MCCC2        | 427395                 | YES | YES | NO  |
| 913 | Methylenetetrahydrofolate dehydrogenase, cyclohydrolase and formyltetrahydrofolate synthetase 1 | MTHFD1       | 423508                 | YES | YES | YES |
| 914 | Methylmalonyl-CoA mutase                                                                        | MUT          | 422049                 | YES | YES | NO  |
| 915 | Methylthioadenosine phosphorylase                                                               | MTAP         | 431261                 | YES | YES | NO  |
| 916 | MHC B-G antigen                                                                                 | BG8          | 417035                 | NO  | NO  | YES |
| 917 | Microsomal glutathione S-transferase 1                                                          | MGST1        | 418178                 | YES | YES | NO  |
| 918 | Microsomal glutathione S-transferase 3                                                          | MGST3        | 424404                 | YES | YES | NO  |
| 919 | Microtubule associated protein 4                                                                | MAP4         | 396097                 | YES | YES | NO  |
| 920 | Microtubule associated protein RP/EB family member 1                                            | MAPRE1       | 419288                 | YES | YES | YES |
| 921 | Microtubule associated protein tau                                                              | MAPT         | 426737                 | NO  | NO  | YES |
| 922 | Microtubule associated serine/threonine kinase 2                                                | MAST2        | 424606                 | NO  | NO  | YES |
| 923 | Microtubule-actin crosslinking factor 1                                                         | MACF1        | 419671                 | NO  | YES | NO  |
| 924 | MIF4G domain containing                                                                         | MIF4GD       | 100858848              | YES | NO  | NO  |
| 925 | Minichromosome maintenance complex component 4                                                  | MCM4         | 426764                 | YES | NO  | NO  |
| 926 | Minichromosome maintenance complex component 6                                                  | MCM6         | 424295                 | YES | YES | NO  |
| 927 | Mitochondria localized glutamic acid rich protein                                               | MGARP        | 770869                 | NO  | YES | NO  |
| 928 | Mitochondrial calcium uniporter dominant negative beta subunit                                  | MCUB         | 422698                 | YES | NO  | NO  |
| 929 | Mitochondrial carrier 2                                                                         | MTCH2        | 395597                 | YES | YES | NO  |
| 930 | Mitochondrial cytochrome c1, heme protein                                                       | N/A          | N/A                    | YES | YES | NO  |
| 931 | Mitogen-activated protein kinase 3                                                              | MAPK3        | 373953                 | YES | YES | NO  |
| 932 | Mitogen-activated protein kinase 14                                                             | MAPK14       | 421183                 | YES | YES | NO  |
| 933 | Mitochondrial ribosomal protein L12                                                             | MRPL12       | 769031                 | YES | YES | NO  |
| 934 | Mitochondrial ribosomal protein L18                                                             | MRPL18       | 421585                 | NO  | YES | NO  |
| 935 | Mitochondrial ribosomal protein L39                                                             | MRPL39       | 418475                 | YES | NO  | NO  |
| 936 | Mitochondrial ribosomal protein L58                                                             | MRPL58       | 422114                 | YES | NO  | NO  |
| 937 | Mitogen-activated protein kinase kinase 2                                                       | MAP2K2       | 396349                 | NO  | YES | NO  |
| 938 | Mitotic spindle positioning                                                                     | MISP         | 420097                 | NO  | YES | YES |
| 939 | MMS19 homolog, cytosolic iron-sulfur assembly component                                         | MMS19        | 423842                 | NO  | YES | NO  |
| 940 | MOB family member 4, phocein                                                                    | MOB4         | 429007                 | YES | YES | NO  |
| 941 | MOB kinase activator 2                                                                          | MOB2         | 423097                 | NO  | YES | NO  |
| 942 | Monoamine oxidase A                                                                             | MAOA         | 418563                 | YES | YES | NO  |
| 943 | Monoglyceride lipase                                                                            | MGLL         | 416024                 | YES | YES | NO  |
| 944 | Mothers against decapentaplegic homolog 2-like                                                  | LOC769000    | 769000                 | YES | NO  | NO  |
| 945 | Mov10 RISC complex RNA helicase                                                                 | MOV10        | 419872                 | YES | NO  | YES |
| 946 | Mucin-5AC-like                                                                                  | MUC5ACL      | 107053416<br>100859916 | YES | YES | NO  |
| 947 | Mucin-5B-like                                                                                   | LOC112532570 | 112532570              | YES | YES | NO  |
| 948 | Muscleblind like splicing regulator 2                                                           | MBNL2        | 418784                 | NO  | NO  | YES |
| 949 | Myoferlin                                                                                       | MYOF         | 423805                 | NO  | YES | NO  |
| 950 | Myosin IB                                                                                       | MYO1B        | 424045                 | YES | YES | NO  |
| 951 | Myosin IC                                                                                       | MYO1C        | 417555                 | YES | YES | NO  |

|     |                                                                                                          |           |           |     |     |     |
|-----|----------------------------------------------------------------------------------------------------------|-----------|-----------|-----|-----|-----|
| 952 | Myosin ID                                                                                                | MYO1D     | 419963    | NO  | YES | NO  |
| 953 | Myosin light chain 12B                                                                                   | MYL12B    | 770011    | YES | YES | YES |
| 954 | Myosin light chain kinase                                                                                | MYLK      | 396445    | YES | YES | NO  |
| 955 | Myosin light chain kinase 2                                                                              | MYLK2     | 396356    | NO  | NO  | YES |
| 956 | Myosin light polypeptide 6                                                                               | LOC654833 | 654833    | YES | YES | NO  |
| 957 | Myosin VI                                                                                                | MYO6      | 395487    | YES | YES | NO  |
| 958 | Myosin XVIIIa                                                                                            | MYO18A    | 417581    | YES | YES | YES |
| 959 | Myosin, heavy chain 9, non-muscle                                                                        | MYH9      | 396469    | YES | YES | YES |
| 960 | Myosin, heavy chain 10, non-muscle                                                                       | MYH10     | 396465    | YES | YES | YES |
| 961 | Myosin, heavy chain 11, smooth muscle                                                                    | MYH11     | 396211    | YES | YES | NO  |
| 962 | Myosin, heavy chain 1D, skeletal muscle (similar to human myosin, heavy chain 1, skeletal muscle, adult) | MYH1D     | 417306    | YES | YES | NO  |
| 963 | Myosin, heavy chain 1F, skeletal muscle (similar to human myosin, heavy chain 1, skeletal muscle, adult) | MYH1F     | 768566    | NO  | NO  | YES |
| 964 | Myosin, light chain 4, alkali; atrial, embryonic                                                         | MYL4      | 396472    | YES | YES | NO  |
| 965 | Myosin, light chain 9, regulatory                                                                        | MYL9      | 396215    | YES | YES | NO  |
| 966 | Myosin-XV-like                                                                                           | MYO15L    | 417377    | YES | NO  | YES |
| 967 | Myristoylated alanine rich protein kinase C substrate                                                    | MARCKS    | 396473    | YES | YES | NO  |
| 968 | N(alpha)-acetyltransferase 15, NatA auxiliary subunit                                                    | NAA15     | 422440    | YES | YES | NO  |
| 969 | N(alpha)-acetyltransferase 50, NatE catalytic subunit                                                    | NAA50     | 418319    | YES | YES | NO  |
| 970 | N-acetylneuraminase synthase                                                                             | NANS      | 427283    | YES | YES | YES |
| 971 | N-acetyltransferase 8B (GCN5-related, putative, gene/pseudogene)                                         | NAT8B     | 776932    | YES | YES | NO  |
| 972 | N-acetyltransferase, pineal gland isozyme NAT-3                                                          | PNAT3     | 415809    | YES | YES | NO  |
| 973 | NACHT and WD repeat domain containing 1                                                                  | NWD1      | 419556    | YES | NO  | NO  |
| 974 | NAD(P)H quinone dehydrogenase 2                                                                          | NQO2      | 420886    | NO  | YES | NO  |
| 975 | NAD(P)HX dehydratase                                                                                     | NAXD      | 418755    | NO  | YES | NO  |
| 976 | NADH:ubiquinone oxidoreductase core subunit S1                                                           | NDUFS1    | 424102    | YES | YES | NO  |
| 977 | NADH:ubiquinone oxidoreductase core subunit S3                                                           | NDUFS3    | 423179    | YES | YES | NO  |
| 978 | NADH:ubiquinone oxidoreductase core subunit S8                                                           | NDUFS8    | 769492    | YES | YES | NO  |
| 979 | NADH:ubiquinone oxidoreductase core subunit V1                                                           | NDUFV1    | 430210    | YES | YES | NO  |
| 980 | NADH:ubiquinone oxidoreductase core subunit V2                                                           | NDUFV2    | 426488    | YES | YES | NO  |
| 981 | NADH:ubiquinone oxidoreductase subunit A5                                                                | NDUFA5    | 417753    | YES | YES | NO  |
| 982 | NADH:ubiquinone oxidoreductase subunit A7                                                                | NDUFA7    | 420065    | YES | YES | NO  |
| 983 | NADH:ubiquinone oxidoreductase subunit A8                                                                | NDUFA8    | 417112    | NO  | YES | NO  |
| 984 | NADH:ubiquinone oxidoreductase subunit A9                                                                | NDUFA9    | 419039    | YES | YES | NO  |
| 985 | NADH:ubiquinone oxidoreductase subunit A10                                                               | NDUFA10   | 424032    | YES | YES | NO  |
| 986 | NADH:ubiquinone oxidoreductase subunit A12                                                               | NDUFA12   | 417907    | YES | YES | NO  |
| 987 | NADH:ubiquinone oxidoreductase subunit B6                                                                | NDUFB6    | 416391    | YES | YES | NO  |
| 988 | NADH:ubiquinone oxidoreductase subunit B8                                                                | NDUFB8    | 423763    | YES | YES | NO  |
| 989 | NADH:ubiquinone oxidoreductase subunit B9                                                                | NDUFB9    | 420337    | YES | YES | NO  |
| 990 | NADH:ubiquinone oxidoreductase subunit B10                                                               | NDUFB10   | 416543    | YES | YES | NO  |
| 991 | NADH:ubiquinone oxidoreductase subunit S4                                                                | NDUFS4    | 374122    | YES | YES | NO  |
| 992 | Nascent polypeptide-associated complex alpha subunit                                                     | NACA      | 396544    | YES | YES | YES |
| 993 | NCK adaptor protein 1                                                                                    | NCK1      | 418727    | YES | NO  | NO  |
| 994 | NCK associated protein 1                                                                                 | NCKAP1    | 424000    | NO  | YES | NO  |
| 995 | NDRG family member 4                                                                                     | NDRG4     | 768618    | NO  | YES | NO  |
| 996 | NEDD8-activating enzyme E1 regulatory subunit                                                            | NAERS     | 107054305 | NO  | YES | YES |
| 997 | Nestin                                                                                                   | NES       | 395890    | YES | NO  | NO  |

|      |                                                               |              |           |     |     |     |
|------|---------------------------------------------------------------|--------------|-----------|-----|-----|-----|
| 998  | N-ethylmaleimide sensitive factor, vesicle fusing ATPase      | NSF          | 419972    | YES | YES | YES |
| 999  | Neuraminidase 2                                               | NEU2         | 107049056 | NO  | YES | NO  |
| 1000 | Neuroblast differentiation-associated protein AHNAK-like      | LOC101750635 | 101750635 | YES | YES | NO  |
| 1001 | Neurofibromin 1                                               | NF1          | 396085    | NO  | YES | NO  |
| 1002 | Neurofilament, light polypeptide                              | NEFL         | 419528    | NO  | NO  | YES |
| 1003 | Neurolysin                                                    | NLN          | 427167    | YES | YES | NO  |
| 1004 | Neuropilin 1                                                  | NRP1         | 395560    | YES | YES | NO  |
| 1005 | Neuroplastin                                                  | NPTN         | 415316    | YES | NO  | NO  |
| 1006 | NFS1, cysteine desulfurase                                    | NFS1         | 419133    | YES | NO  | YES |
| 1007 | NHP2 ribonucleoprotein                                        | NHP2         | 416218    | YES | YES | YES |
| 1008 | Nicalin                                                       | NCLN         | 426048    | NO  | YES | NO  |
| 1009 | Nicotinamide nucleotide transhydrogenase                      | NNT          | 427196    | YES | YES | NO  |
| 1010 | Nicotinamide phosphoribosyltransferase pseudogene 1           | NAMPTP1      | 417707    | NO  | YES | NO  |
| 1011 | Nidogen 1                                                     | NID1         | 395531    | YES | YES | NO  |
| 1012 | Nidogen 2                                                     | NID2         | 423583    | YES | NO  | NO  |
| 1013 | Nipsnap homolog 2                                             | NIPSNAP2     | 417539    | YES | YES | NO  |
| 1014 | Nitrilase family member 2                                     | NIT2         | 418386    | YES | YES | NO  |
| 1015 | NME/NM23 nucleoside diphosphate kinase 2                      | NME2         | 395916    | YES | YES | YES |
| 1016 | NmrA like redox sensor 1                                      | NMRAL1       | 416672    | YES | YES | NO  |
| 1017 | N-myristoyltransferase 1                                      | NMT1         | 419966    | YES | NO  | NO  |
| 1018 | Non-POU domain containing, octamer-binding                    | NONO         | 428701    | YES | YES | YES |
| 1019 | Non-SMC condensin I complex subunit D2                        | NCAPD2       | 418275    | NO  | NO  | YES |
| 1020 | NOP56 ribonucleoprotein                                       | NOP56        | 426574    | YES | NO  | NO  |
| 1021 | NOP58 ribonucleoprotein                                       | NOP58        | 424087    | YES | NO  | NO  |
| 1022 | NPL4 homolog, ubiquitin recognition factor                    | NPLOC4       | 417456    | YES | NO  | YES |
| 1023 | NSF attachment protein alpha                                  | NAPA         | 100858304 | YES | YES | YES |
| 1024 | NSF attachment protein gamma                                  | NAPG         | 421051    | NO  | NO  | YES |
| 1025 | NSFL1 cofactor                                                | NSFL1C       | 419268    | YES | YES | YES |
| 1026 | Nuclear autoantigenic sperm protein                           | NASP         | 424600    | YES | YES | NO  |
| 1027 | Nuclear casein kinase and cyclin dependent kinase substrate 1 | NUCKS1       | 404775    | NO  | NO  | YES |
| 1028 | Nuclear distribution C, dynein complex regulator              | NUDC         | 419578    | YES | NO  | NO  |
| 1029 | Nuclear mitotic apparatus protein 1                           | NUMA1        | 768717    | YES | YES | YES |
| 1030 | Nucleobindin 2                                                | NUCB2        | 423071    | YES | YES | YES |
| 1031 | Nucleolin                                                     | NCL          | 396201    | YES | YES | YES |
| 1032 | Nucleophosmin                                                 | NPM1         | 396203    | YES | YES | YES |
| 1033 | Nucleophosmin/nucleoplasmin 3                                 | NPM3         | 770430    | NO  | YES | YES |
| 1034 | Nucleoporin 85                                                | NUP85        | 422120    | YES | NO  | NO  |
| 1035 | Nucleoporin 93                                                | NUP93        | 415693    | YES | NO  | NO  |
| 1036 | Nucleoporin 133                                               | NUP133       | 421535    | YES | NO  | YES |
| 1037 | Nucleoporin 155                                               | NUP155       | 427443    | YES | NO  | YES |
| 1038 | Nucleoporin 205                                               | NUP205       | 417935    | YES | NO  | YES |
| 1039 | Nucleoporin 210                                               | NUP210       | 415977    | YES | YES | YES |
| 1040 | Nucleoporin 214                                               | NUP214       | 427760    | NO  | NO  | YES |
| 1041 | Nucleosome assembly protein 1 like 1                          | NAP1L1       | 417864    | YES | YES | YES |
| 1042 | Nucleosome assembly protein 1 like 4                          | NAP1L4       | 423087    | YES | YES | YES |
| 1043 | NudC domain containing 1                                      | NUDCD1       | 428379    | YES | NO  | NO  |
| 1044 | NudC domain containing 2                                      | NUDCD2       | 416162    | NO  | NO  | YES |
| 1045 | Nudix hydrolase 1                                             | NUDT1        | 416467    | YES | YES | NO  |

|      |                                                        |           |           |     |     |     |
|------|--------------------------------------------------------|-----------|-----------|-----|-----|-----|
| 1046 | Nudix hydrolase 2                                      | NUDT2     | 427399    | YES | YES | NO  |
| 1047 | Nudix hydrolase 3                                      | NUDT3     | 419905    | NO  | YES | NO  |
| 1048 | Nudix hydrolase 16 like 1                              | NUDT16L1  | 395557    | YES | YES | YES |
| 1049 | Nudix hydrolase 21                                     | NUDT21    | 100858636 | YES | YES | YES |
| 1050 | Obg like ATPase 1                                      | OLA1      | 424144    | YES | YES | YES |
| 1051 | Ornithine aminotransferase                             | OAT       | 426430    | YES | YES | NO  |
| 1052 | Orosomucoid 1 (ovoglycoprotein)                        | ORM1      | 395220    | YES | YES | YES |
| 1053 | Osteoclast stimulating factor 1                        | OSTF1     | 427258    | YES | YES | NO  |
| 1054 | Osteoglycin                                            | OGN       | 374039    | YES | YES | NO  |
| 1055 | OTU deubiquitinase, ubiquitin aldehyde binding 1       | OTUB1     | 777320    | YES | YES | YES |
| 1056 | Ovalbumin (SERPINB14)                                  | OVAL      | 396058    | YES | YES | YES |
| 1057 | Ovalbumin-related protein X (SERPINB14C)               | OVALX     | 420898    | YES | YES | NO  |
| 1058 | Ovalbumin-related protein Y (SERPINB14B)               | OVALY     | 420897    | YES | YES | NO  |
| 1059 | Ovomucin, alpha subunit                                | LOC395381 | 395381    | YES | YES | NO  |
| 1060 | Ovostatin                                              | OVST      | 396151    | YES | YES | NO  |
| 1061 | Oxoglutarate dehydrogenase                             | OGDH      | 426429    | YES | YES | YES |
| 1062 | Oxysterol binding protein like 8                       | OSBPL8    | 417866    | YES | NO  | NO  |
| 1063 | Oxysterol binding protein like 10                      | OSBPL10   | 420663    | YES | NO  | NO  |
| 1064 | Palladin, cytoskeletal associated protein              | PALLD     | 422428    | YES | YES | NO  |
| 1065 | Palmitoyl-protein thioesterase 1                       | PPT1      | 419681    | YES | NO  | NO  |
| 1066 | Paraoxonase 1                                          | PON1      | 395830    | YES | YES | YES |
| 1067 | Paraspeckle component 1                                | PSPC1     | 418955    | YES | NO  | NO  |
| 1068 | Parkinsonism associated deglycase                      | PARK7     | 395277    | YES | YES | YES |
| 1069 | PBX homeobox interacting protein 1                     | PBXIP1    | 100857958 | YES | YES | NO  |
| 1070 | PC4 and SFRS1 interacting protein 1                    | PSIP1     | 431605    | YES | NO  | NO  |
| 1071 | PDGFA associated protein 1                             | PDAP1     | 416491    | NO  | YES | YES |
| 1072 | PDS5 cohesin associated factor B                       | PDS5B     | 418910    | YES | NO  | YES |
| 1073 | PDZ and LIM domain 1                                   | PDLIM1    | 428948    | YES | YES | YES |
| 1074 | PDZ and LIM domain 3                                   | PDLIM3    | 414873    | YES | NO  | NO  |
| 1075 | PDZ and LIM domain 5                                   | PDLIM5    | 422699    | YES | NO  | NO  |
| 1076 | Penta-EF-hand domain containing 1                      | PEF1      | 419644    | YES | YES | YES |
| 1077 | Peptidase D                                            | PEPD      | 415776    | YES | YES | NO  |
| 1078 | Peptidase M20 domain containing 1                      | PM20D1    | 419838    | NO  | NO  | YES |
| 1079 | Peptidase, mitochondrial processing alpha subunit      | PMPCA     | 417134    | YES | YES | NO  |
| 1080 | Peptidylprolyl cis/trans isomerase, NIMA-interacting 4 | PIN4      | 422134    | NO  | YES | NO  |
| 1081 | Peptidylprolyl isomerase A                             | PPIA      | 776282    | YES | YES | YES |
| 1082 | Peptidylprolyl isomerase B (cyclophilin B)             | PPIB      | 396447    | YES | YES | YES |
| 1083 | Peptidylprolyl isomerase D                             | PPID      | 428725    | YES | YES | YES |
| 1084 | Peptidylprolyl isomerase H                             | PPIH      | 419507    | YES | YES | NO  |
| 1085 | Peptidylprolyl isomerase like 1                        | PPIL1     | 100859332 | YES | YES | YES |
| 1086 | Perilipin-4                                            | PLIN4     | 100857433 | YES | YES | NO  |
| 1087 | Periplakin                                             | PPL       | 408044    | YES | YES | NO  |
| 1088 | Peroxiredoxin 1                                        | PRDX1     | 424598    | YES | YES | YES |
| 1089 | Peroxiredoxin 3                                        | PRDX3     | 428986    | YES | YES | YES |
| 1090 | Peroxiredoxin 4                                        | PRDX4     | 418601    | YES | YES | NO  |
| 1091 | Peroxiredoxin 6                                        | PRDX6     | 429062    | YES | YES | YES |
| 1092 | Peroxisomal trans-2-enoyl-CoA reductase                | PECR      | 424224    | YES | YES | NO  |
| 1093 | PEST proteolytic signal containing nuclear protein     | PCNP      | 418398    | YES | YES | YES |

|      |                                                                                                                            |                               |                         |     |     |     |
|------|----------------------------------------------------------------------------------------------------------------------------|-------------------------------|-------------------------|-----|-----|-----|
| 1094 | Phenylalanyl-tRNA synthetase alpha subunit                                                                                 | FARSA                         | 100859604               | YES | YES | YES |
| 1095 | Phenylalanyl-tRNA synthetase beta subunit                                                                                  | FARSB                         | 424812                  | YES | YES | YES |
| 1096 | Phosphatase domain containing, paladin 1                                                                                   | PALD1                         | 373898                  | NO  | NO  | YES |
| 1097 | Phosphate cytidylyltransferase 1, choline, alpha                                                                           | PCYT1A                        | 424915                  | NO  | NO  | YES |
| 1098 | Phosphate regulating endopeptidase homolog, X-linked                                                                       | PHEX                          | 395777                  | YES | NO  | NO  |
| 1099 | Phosphatidylethanolamine binding protein 1                                                                                 | PEBP1                         | 416990                  | YES | YES | YES |
| 1100 | Phosphatidylinositol transfer protein beta                                                                                 | PITPNB                        | 416912                  | YES | NO  | YES |
| 1101 | Phosphodiesterase 6D                                                                                                       | PDE6D                         | 424932                  | NO  | YES | NO  |
| 1102 | Phosphofructokinase, platelet                                                                                              | PFKP                          | 428411                  | YES | YES | YES |
| 1103 | Phosphoglucomutase 1                                                                                                       | PGM1                          | 424691                  | YES | YES | NO  |
| 1104 | Phosphoglucomutase 2                                                                                                       | PGM2                          | 426435                  | YES | YES | YES |
| 1105 | Phosphoglucomutase 2 like 1                                                                                                | PGM2L1                        | 419052                  | NO  | NO  | YES |
| 1106 | Phosphoglucomutase 3                                                                                                       | PGM3                          | 421841                  | YES | YES | NO  |
| 1107 | Phosphoglucomutase 5                                                                                                       | PGM5                          | 427215                  | YES | YES | NO  |
| 1108 | Phosphogluconate dehydrogenase                                                                                             | PGD                           | 419450                  | YES | YES | YES |
| 1109 | Phosphoglycerate dehydrogenase                                                                                             | PHGDH                         | 424381                  | YES | YES | NO  |
| 1110 | Phosphoglycerate kinase 2                                                                                                  | PGK2                          | 395833                  | YES | YES | YES |
| 1111 | Phosphoglycerate mutase 1                                                                                                  | PGAM1                         | 428969                  | YES | YES | NO  |
| 1112 | Phosphoglycolate phosphatase                                                                                               | PGP                           | 416559                  | YES | YES | YES |
| 1113 | phospholipase A2 receptor 1                                                                                                | PLA2R1                        | 404304                  | YES | YES | NO  |
| 1114 | Phospholipase C delta 1                                                                                                    | PLCD1                         | 420416                  | NO  | YES | NO  |
| 1115 | Phospholipase C gamma 1                                                                                                    | PLCG1                         | 419175                  | NO  | NO  | YES |
| 1116 | Phosphomannomutase 1                                                                                                       | PMM1                          | 417989                  | NO  | YES | NO  |
| 1117 | Phosphomannomutase 2                                                                                                       | PMM2                          | 427679                  | YES | YES | NO  |
| 1118 | Phosphopantothenoylcysteine synthetase                                                                                     | PPCS                          | 100859789               | YES | YES | YES |
| 1119 | Phosphoribosyl pyrophosphate synthetase 1-like 1                                                                           | PRPS1L1                       | 422185                  | YES | YES | YES |
| 1120 | Phosphoribosyl pyrophosphate synthetase associated protein 1                                                               | PRPSAP1                       | 417360                  | NO  | YES | YES |
| 1121 | Phosphoribosyl pyrophosphate synthetase associated protein 2                                                               | PRPSAP2                       | 416521                  | YES | NO  | YES |
| 1122 | Phosphoribosylaminoimidazole carboxylase and phosphoribosylaminoimidazolesuccinocarboxamide synthase                       | PAICS                         | 396534                  | YES | YES | YES |
| 1123 | Phosphoribosylglycinamide formyltransferase, phosphoribosylglycinamide synthetase, phosphoribosylaminoimidazole synthetase | GART                          | 395315                  | YES | YES | YES |
| 1124 | Phosphorylase, glycogen, liver                                                                                             | PYGL                          | 378909                  | YES | YES | NO  |
| 1125 | phosphorylase, glycogen; brain                                                                                             | PYGB                          | 421248                  | YES | YES | NO  |
| 1126 | Phosphotriesterase related                                                                                                 | PTER                          | 420525                  | YES | YES | YES |
| 1127 | Piccolo presynaptic cytomatrix protein                                                                                     | PCLO                          | 395319                  | NO  | YES | NO  |
| 1128 | Piezo type mechanosensitive ion channel component 1                                                                        | PIEZO1                        | 415849                  | NO  | YES | NO  |
| 1129 | PIT54 protein                                                                                                              | PIT54                         | 395364                  | NO  | YES | YES |
| 1130 | Pitriysin metallopeptidase 1                                                                                               | PITRM1                        | 420462                  | YES | YES | NO  |
| 1131 | Plasminogen                                                                                                                | PLG                           | 421580                  | YES | YES | YES |
| 1132 | Plastin 3                                                                                                                  | PLS3                          | 422222                  | YES | YES | YES |
| 1133 | Platelet activating factor acetylhydrolase 1b catalytic subunit 2                                                          | PAFAH1B2                      | 419765                  | YES | YES | NO  |
| 1134 | Platelet activating factor acetylhydrolase 1b regulatory subunit 1                                                         | PAFAH1B1                      | 374224                  | YES | YES | YES |
| 1135 | Platelet and endothelial cell adhesion molecule 1                                                                          | PECAM1                        | 771243                  | YES | YES | NO  |
| 1136 | Pleckstrin                                                                                                                 | PLEK                          | 395669                  | NO  | NO  | YES |
| 1137 | Pleckstrin homology and RhoGEF domain containing G1                                                                        | PLEKHG1                       | 421632                  | YES | YES | NO  |
| 1138 | Plectin-like                                                                                                               | LOC112531804,<br>LOC107050437 | 112531804,<br>107050437 | YES | YES | NO  |



|      |                                                           |              |           |     |     |     |
|------|-----------------------------------------------------------|--------------|-----------|-----|-----|-----|
| 1139 | Plexin A1                                                 | PLXNA1       | 416030    | NO  | YES | NO  |
| 1140 | Plexin B2                                                 | PLXNB2       | 425938    | YES | YES | NO  |
| 1141 | pM5 protein                                               | PM5          | 416602    | YES | YES | YES |
| 1142 | Podocalyxin like                                          | PODXL        | 395755    | NO  | YES | NO  |
| 1143 | Poly(A) binding protein cytoplasmic 1                     | PABPC1       | 430997    | YES | YES | YES |
| 1144 | Poly(rC)-binding protein 2-like                           | LOC426023    | 426023    | YES | YES | YES |
| 1145 | Poly(U) binding splicing factor 60                        | PUF60        | 426402    | YES | NO  | YES |
| 1146 | Polymerase (RNA) I polypeptide B, 128kDa                  | POLR1B       | 101749883 | YES | YES | NO  |
| 1147 | Polymerase I and transcript release factor                | PTRF         | 396006    | YES | YES | NO  |
| 1148 | Polypeptide N-acetylgalactosaminyltransferase 7           | GALNT7       | 422561    | YES | YES | NO  |
| 1149 | Polypyrimidine tract binding protein 1                    | PTBP1        | 420098    | YES | YES | YES |
| 1150 | Potassium channel tetramerization domain containing 12    | KCTD12       | 107051871 | YES | YES | NO  |
| 1151 | Potassium channel tetramerization domain containing 12B   | KCTD12B      | 425504    | NO  | YES | NO  |
| 1152 | Potassium channel tetramerization domain containing 16    | KCTD16       | 427644    | YES | YES | NO  |
| 1153 | PPFIA binding protein 1                                   | PPFIBP1      | 418219    | YES | NO  | NO  |
| 1154 | Prefoldin subunit 2                                       | PFDN2        | 100858383 | YES | YES | NO  |
| 1155 | Prefoldin subunit 4                                       | PFDN4        | 419337    | NO  | YES | NO  |
| 1156 | Prefoldin subunit 5                                       | PFDN5        | 100859376 | YES | YES | NO  |
| 1157 | Pre-mRNA processing factor 4                              | PRPF4        | 417270    | YES | NO  | NO  |
| 1158 | Pre-mRNA processing factor 6                              | PRPF6        | 419254    | YES | NO  | NO  |
| 1159 | Pre-mRNA processing factor 8                              | PRPF8        | 417559    | YES | YES | YES |
| 1160 | Pre-mRNA-processing factor 19                             | PRPF19       | 430767    | YES | YES | YES |
| 1161 | pre-mRNA-processing factor 19-like                        | PRPF19L      | 107053341 | YES | YES | YES |
| 1162 | pre-mRNA-splicing factor SYF1-like                        | LOC107051321 | 107051321 | YES | NO  | NO  |
| 1163 | Prenylcysteine oxidase 1                                  | PCYOX1       | 426297    | YES | YES | NO  |
| 1164 | Procollagen-lysine, 2-oxoglutarate 5-dioxygenase 1        | PLOD1        | 419485    | YES | YES | NO  |
| 1165 | Procollagen-lysine,2-oxoglutarate 5-dioxygenase 2         | PLOD2        | 424882    | YES | NO  | NO  |
| 1166 | Profilin 2                                                | PFN2         | 771904    | YES | YES | NO  |
| 1167 | Progesterone receptor membrane component 1                | PGRMC1       | 772196    | YES | YES | NO  |
| 1168 | Progesterone receptor membrane component 2                | PGRMC2       | 422501    | YES | YES | NO  |
| 1169 | programmed cell death 4                                   | PDCD4        | 374191    | YES | NO  | NO  |
| 1170 | Programmed cell death 6                                   | PDCD6        | 420988    | YES | YES | YES |
| 1171 | Programmed cell death 6 interacting protein               | PDCD6IP      | 420725    | YES | YES | NO  |
| 1172 | Prohibitin                                                | PHB          | 419980    | YES | YES | YES |
| 1173 | Prohibitin-2                                              | PHB2         | 771124    | YES | YES | YES |
| 1174 | Proliferating cell nuclear antigen                        | PCNA         | 373984    | YES | YES | NO  |
| 1175 | Proliferation-associated 2G4, 38kDa                       | PA2G4        | 425279    | YES | YES | YES |
| 1176 | Proline and arginine rich end leucine rich repeat protein | PRELP        | 419933    | YES | YES | NO  |
| 1177 | Proline rich coiled-coil 1                                | PRRC1        | 427127    | YES | YES | NO  |
| 1178 | Proline synthetase cotranscribed homolog (bacterial)      | PROSC        | 426770    | YES | YES | YES |
| 1179 | Prolyl 3-hydroxylase 1                                    | P3H1         | 414142    | YES | NO  | NO  |
| 1180 | Prolyl 3-hydroxylase 3                                    | P3H3         | 418289    | YES | NO  | NO  |
| 1181 | Prolyl 4-hydroxylase subunit alpha 1                      | P4HA1        | 423704    | YES | NO  | NO  |
| 1182 | Prolyl 4-hydroxylase subunit beta                         | P4HB         | 374091    | YES | YES | YES |
| 1183 | Prolyl endopeptidase                                      | PREP         | 421785    | YES | YES | YES |
| 1184 | Prolylcarboxypeptidase                                    | PRCP         | 428096    | YES | NO  | NO  |
| 1185 | Propionyl-CoA carboxylase alpha subunit                   | PCCA         | 418774    | NO  | YES | NO  |
| 1186 | Propionyl-CoA carboxylase beta subunit                    | PCCB         | 768706    | YES | YES | NO  |

|      |                                                                                       |           |           |     |     |     |
|------|---------------------------------------------------------------------------------------|-----------|-----------|-----|-----|-----|
| 1187 | Prostaglandin D2 synthase 21kDa (brain)                                               | PTGDS     | 374110    | YES | YES | NO  |
| 1188 | Prostaglandin E synthase 3                                                            | PTGES3    | 100859133 | YES | YES | YES |
| 1189 | Prostaglandin F2 receptor inhibitor                                                   | PTGFRN    | 418449    | YES | YES | NO  |
| 1190 | Prostaglandin reductase 1                                                             | PTGR1     | 427337    | YES | YES | YES |
| 1191 | Prostaglandin-endoperoxide synthase 1 (prostaglandin G/H synthase and cyclooxygenase) | PTGS1     | 427752    | NO  | YES | NO  |
| 1192 | Proteasome (prosome, macropain) 26S subunit, non-ATPase, 13                           | LOC422989 | 422989    | YES | YES | YES |
| 1193 | Proteasome 26S subunit, ATPase 1                                                      | PSMC1     | 395804    | YES | YES | YES |
| 1194 | Proteasome 26S subunit, ATPase 2                                                      | PSMC2     | 417716    | YES | YES | YES |
| 1195 | Proteasome 26S subunit, ATPase 3                                                      | PSMC3     | 423182    | YES | YES | YES |
| 1196 | Proteasome 26S subunit, ATPase 5                                                      | PSMC5     | 428274    | YES | YES | NO  |
| 1197 | Proteasome 26S subunit, ATPase 6                                                      | PSMC6     | 423586    | YES | YES | YES |
| 1198 | Proteasome 26S subunit, non-ATPase 1                                                  | PSMD1     | 424926    | YES | YES | YES |
| 1199 | Proteasome 26S subunit, non-ATPase 2                                                  | PSMD2     | 425294    | YES | YES | YES |
| 1200 | Proteasome 26S subunit, non-ATPase 3                                                  | PSMD3     | 426133    | YES | YES | YES |
| 1201 | Proteasome 26S subunit, non-ATPase 4                                                  | PSMD4     | 100216364 | YES | YES | YES |
| 1202 | Proteasome 26S subunit, non-ATPase 5                                                  | PSMD5     | 417125    | YES | YES | YES |
| 1203 | Proteasome 26S subunit, non-ATPase 6                                                  | PSMD6     | 416079    | YES | YES | YES |
| 1204 | Proteasome 26S subunit, non-ATPase 7                                                  | PSMD7     | 415869    | YES | YES | YES |
| 1205 | Proteasome 26S subunit, non-ATPase 9                                                  | PSMD9     | 416853    | YES | YES | YES |
| 1206 | Proteasome 26S subunit, non-ATPase 10                                                 | PSMD10    | 422351    | YES | YES | YES |
| 1207 | Proteasome 26S subunit, non-ATPase 11                                                 | PSMD11    | 430878    | YES | YES | YES |
| 1208 | Proteasome 26S subunit, non-ATPase 12                                                 | PSMD12    | 417425    | YES | YES | YES |
| 1209 | Proteasome 26S subunit, non-ATPase 14                                                 | PSMD14    | 424189    | YES | YES | YES |
| 1210 | Proteasome assembly chaperone 1                                                       | PSMG1     | 418520    | YES | YES | NO  |
| 1211 | Proteasome assembly chaperone 2                                                       | PSMG2     | 421040    | YES | YES | NO  |
| 1212 | Proteasome inhibitor subunit 1                                                        | PSMF1     | 430115    | YES | YES | YES |
| 1213 | Proteasome subunit alpha 1                                                            | PSMA1     | 395874    | YES | YES | YES |
| 1214 | Proteasome subunit alpha 2                                                            | PSMA2     | 420772    | YES | YES | YES |
| 1215 | Proteasome subunit alpha 3                                                            | PSMA3     | 423542    | YES | YES | YES |
| 1216 | Proteasome subunit alpha 4                                                            | PSMA4     | 415357    | YES | YES | YES |
| 1217 | Proteasome subunit alpha 5                                                            | PSMA5     | 426937    | YES | YES | YES |
| 1218 | Proteasome subunit alpha 6                                                            | PSMA6     | 423326    | YES | YES | YES |
| 1219 | Proteasome subunit alpha 7                                                            | PSMA7     | 395318    | YES | YES | YES |
| 1220 | Proteasome subunit beta 1                                                             | PSMB1     | 421551    | YES | YES | YES |
| 1221 | Proteasome subunit beta 2                                                             | PSMB2     | 419630    | YES | YES | YES |
| 1222 | Proteasome subunit beta 3                                                             | PSMB3     | 419997    | YES | YES | YES |
| 1223 | Proteasome subunit beta 4                                                             | PSMB4     | 429986    | YES | YES | YES |
| 1224 | Proteasome subunit beta 5                                                             | PSMB5     | 396003    | YES | YES | YES |
| 1225 | Proteasome subunit beta 7                                                             | PSMB7     | 378915    | YES | YES | YES |
| 1226 | Protein arginine methyltransferase 1 variant 1                                        | N/A       | N/A       | YES | YES | YES |
| 1227 | Protein arginine methyltransferase 5                                                  | PRMT5     | 101750306 | YES | YES | YES |
| 1228 | Protein disulfide isomerase family A member 3                                         | PDIA3     | 373899    | YES | YES | YES |
| 1229 | Protein disulfide isomerase family A member 4                                         | PDIA4     | 420785    | YES | YES | YES |
| 1230 | Protein disulfide isomerase family A member 5                                         | PDIA5     | 424249    | YES | YES | NO  |
| 1231 | Protein disulfide isomerase family A member 6                                         | PDIA6     | 421940    | YES | YES | YES |
| 1232 | Protein kinase C and casein kinase substrate in neurons 2                             | PACSN2    | 395975    | NO  | YES | NO  |
| 1233 | Protein kinase C delta                                                                | PRKCD     | 415905    | NO  | YES | NO  |

|      |                                                                              |              |           |     |     |     |
|------|------------------------------------------------------------------------------|--------------|-----------|-----|-----|-----|
| 1234 | Protein kinase cAMP-activated catalytic subunit beta                         | PRKACB       | 424542    | YES | NO  | NO  |
| 1235 | Protein kinase cAMP-dependent type I regulatory subunit alpha                | PRKAR1A      | 417438    | YES | YES | NO  |
| 1236 | Protein O-fucosyltransferase 1                                               | POFUT1       | 395070    | YES | YES | NO  |
| 1237 | Protein O-fucosyltransferase 2                                               | POFUT2       | 395112    | NO  | YES | NO  |
| 1238 | Protein phosphatase 1 catalytic subunit beta                                 | PPP1CB       | 396019    | YES | YES | YES |
| 1239 | Protein phosphatase 1 regulatory subunit 7                                   | PPP1R7       | 424844    | YES | NO  | YES |
| 1240 | Protein phosphatase 1 regulatory subunit 21                                  | PPP1R21      | 421287    | YES | YES | YES |
| 1241 | Protein phosphatase 1, regulatory (inhibitor) subunit 9B                     | PPP1R9B      | 395762    | YES | NO  | NO  |
| 1242 | Protein phosphatase 2 catalytic subunit beta                                 | PPP2CB       | 396021    | YES | YES | NO  |
| 1243 | Protein phosphatase 2 phosphatase activator                                  | PTPA         | 426329    | YES | YES | YES |
| 1244 | Protein phosphatase 2 regulatory subunit B alpha                             | PPP2R2A      | 419523    | YES | YES | YES |
| 1245 | Protein phosphatase 2 regulatory subunit B delta                             | PPP2R5D      | 421250    | YES | NO  | NO  |
| 1246 | Protein phosphatase 3, catalytic subunit, alpha isozyme                      | PPP3CA       | 395113    | YES | YES | NO  |
| 1247 | Protein phosphatase 6 catalytic subunit                                      | PPP6C        | 772354    | YES | NO  | YES |
| 1248 | Protein phosphatase, Mg2+/Mn2+ dependent 1B                                  | PPM1B        | 421404    | YES | YES | YES |
| 1249 | Protein S100-A9-like                                                         | LOC101747386 | 101747386 | NO  | YES | NO  |
| 1250 | Protein tyrosine phosphatase non-receptor type 11                            | PTPN11       | 395815    | NO  | NO  | YES |
| 1251 | Protein tyrosine phosphatase type 4A2                                        | PTP4A2       | 100543852 | YES | YES | NO  |
| 1252 | Protein tyrosine phosphatase, receptor type D                                | PTPRD        | 431602    | YES | NO  | NO  |
| 1253 | Protein-L-isoaspartate (D-aspartate) O-methyltransferase                     | PCMT1        | 428607    | YES | YES | YES |
| 1254 | Putative glutamine amidotransferase like class 1 domain containing 3A-like 1 | GATD3AL1     | 418811    | YES | YES | YES |
| 1255 | Putative glutamine amidotransferase like class 1 domain containing 3A-like 2 | GATD3AL2     | 422305    | YES | YES | NO  |
| 1256 | Putative methyltransferase DDB_G0268948                                      | LOC107048987 | 107048987 | YES | YES | YES |
| 1257 | Pyridoxal (pyridoxine, vitamin B6) kinase                                    | PDXK         | 418549    | NO  | YES | NO  |
| 1258 | Pyridoxal phosphatase                                                        | PDXP         | 771207    | NO  | YES | NO  |
| 1259 | Pyrrroline-5-carboxylate reductase 1                                         | PYCR1        | 769203    | YES | NO  | NO  |
| 1260 | Pyrrroline-5-carboxylate reductase-like                                      | PYCR1        | 420293    | YES | YES | NO  |
| 1261 | Pyruvate carboxylase                                                         | PC           | 374263    | YES | YES | NO  |
| 1262 | Pyruvate dehydrogenase (lipoamide) alpha 1                                   | PDHA1        | 418610    | YES | YES | YES |
| 1263 | Pyruvate dehydrogenase (lipoamide) beta                                      | PDHB         | 416066    | YES | YES | NO  |
| 1264 | Pyruvate kinase, liver and RBC                                               | PKLR         | 396456    | YES | YES | YES |
| 1265 | QKI, KH domain containing RNA binding                                        | QKI          | 374204    | YES | YES | NO  |
| 1266 | Quinoid dihydropteridine reductase                                           | QDPR         | 426335    | YES | YES | YES |
| 1267 | RAB1B, member RAS oncogene family                                            | RAB1B        | 421273    | YES | YES | YES |
| 1268 | RAB2A, member RAS oncogene family                                            | RAB2A        | 396153    | YES | YES | YES |
| 1269 | RAB2B, member RAS oncogene family                                            | RAB2B        | 100858328 | YES | YES | NO  |
| 1270 | RAB3B, member RAS oncogene family                                            | RAB3B        | 424636    | YES | NO  | NO  |
| 1271 | RAB4A, member RAS oncogene family                                            | RAB4A        | 421532    | NO  | YES | NO  |
| 1272 | RAB5A, member RAS oncogene family                                            | RAB5A        | 420649    | YES | YES | NO  |
| 1273 | RAB5B, member RAS oncogene family                                            | RAB5B        | 100529061 | YES | YES | YES |
| 1274 | RAB5C, member RAS oncogene family                                            | RAB5C        | 395197    | NO  | YES | YES |
| 1275 | RAB6A, member RAS oncogene family                                            | RAB6A        | 419063    | YES | YES | NO  |
| 1276 | RAB7A, member RAS oncogene family                                            | RAB7A        | 416016    | YES | YES | YES |
| 1277 | RAB8A, member RAS oncogene family                                            | RAB8A        | 428352    | NO  | YES | NO  |
| 1278 | RAB8B, member RAS oncogene family                                            | RAB8B        | 415371    | YES | YES | YES |
| 1279 | RAB9A, member RAS oncogene family                                            | RAB9A        | 418635    | YES | YES | YES |
| 1280 | RAB10, member RAS oncogene family                                            | RAB10        | 421994    | YES | YES | NO  |
| 1281 | RAB11B, member RAS oncogene family                                           | RAB11B       | 420063    | YES | YES | YES |

|      |                                                                                         |          |           |     |     |     |
|------|-----------------------------------------------------------------------------------------|----------|-----------|-----|-----|-----|
| 1282 | RAB12, member RAS oncogene family                                                       | RAB12    | 421048    | NO  | NO  | YES |
| 1283 | RAB14, member RAS oncogene family                                                       | RAB14    | 417119    | YES | YES | YES |
| 1284 | RAB18, member RAS oncogene family                                                       | RAB18    | 420483    | YES | YES | NO  |
| 1285 | RAB21, member RAS oncogene family                                                       | RAB21    | 771383    | YES | YES | YES |
| 1286 | RAB22A, member RAS oncogene family                                                      | RAB22A   | 419318    | YES | YES | NO  |
| 1287 | RAB27A, member RAS oncogene family                                                      | RAB27A   | 415410    | YES | YES | NO  |
| 1288 | RAB32, member RAS oncogene family                                                       | RAB32    | 421616    | YES | YES | NO  |
| 1289 | RAB33B, member RAS oncogene family                                                      | RAB33B   | 422441    | YES | NO  | NO  |
| 1290 | RAB34, member RAS oncogene family                                                       | RAB34    | 100858849 | YES | YES | NO  |
| 1291 | RAD23 homolog B, nucleotide excision repair protein                                     | RAD23B   | 431623    | YES | YES | YES |
| 1292 | Radixin                                                                                 | RDX      | 395511    | YES | YES | YES |
| 1293 | Raftlin, lipid raft linker 1                                                            | RFTN1    | 395109    | YES | YES | NO  |
| 1294 | RALY heterogeneous nuclear ribonucleoprotein                                            | RALY     | 419148    | YES | NO  | YES |
| 1295 | RAN binding protein 1                                                                   | RANBP1   | 416787    | YES | NO  | YES |
| 1296 | RAN binding protein 2                                                                   | RANBP2   | 418730    | YES | NO  | NO  |
| 1297 | RAN, member RAS oncogene family                                                         | RAN      | 396193    | YES | YES | YES |
| 1298 | Rap1 GTPase-GDP dissociation stimulator 1                                               | RAP1GDS1 | 422701    | YES | YES | NO  |
| 1299 | RAP1A, member of RAS oncogene family                                                    | RAP1A    | 419867    | NO  | YES | YES |
| 1300 | RAP1B, member of RAS oncogene family                                                    | RAP1B    | 417840    | YES | YES | YES |
| 1301 | RAP2A, member of RAS oncogene family                                                    | RAP2A    | 769797    | NO  | YES | NO  |
| 1302 | Ras homolog enriched in brain                                                           | RHEB     | 420434    | NO  | YES | NO  |
| 1303 | Ras homolog family member A                                                             | RHOA     | 395442    | YES | YES | NO  |
| 1304 | RAS like proto-oncogene A                                                               | RALA     | 420765    | YES | YES | YES |
| 1305 | Ras related GTP binding A                                                               | RRAGA    | 422311    | YES | YES | NO  |
| 1306 | Ras suppressor protein 1                                                                | RSU1     | 420524    | YES | YES | NO  |
| 1307 | Ras-related C3 botulinum toxin substrate 1 (rho family, small GTP binding protein Rac1) | RAC1     | 395871    | YES | YES | YES |
| 1308 | RB binding protein 4, chromatin remodeling factor                                       | RBBP4    | 395658    | YES | YES | YES |
| 1309 | RB binding protein 7, chromatin remodeling factor                                       | RBBP7    | 395390    | YES | YES | NO  |
| 1310 | Receptor accessory protein 5                                                            | REEP5    | 770021    | YES | YES | NO  |
| 1311 | Receptor for activated C kinase 1                                                       | RACK1    | 417044    | YES | YES | YES |
| 1312 | Regulation of nuclear pre-mRNA domain containing 1B                                     | RPRD1B   | 419295    | YES | NO  | YES |
| 1313 | Regulator of chromosome condensation 1                                                  | RCC1     | 429810    | YES | NO  | YES |
| 1314 | Regulator of chromosome condensation 2                                                  | RCC2     | 419361    | YES | YES | YES |
| 1315 | Regulator of microtubule dynamics 1                                                     | RMDN1    | 420213    | YES | YES | NO  |
| 1316 | Related RAS viral (r-ras) oncogene homolog                                              | RRAS     | 423062    | YES | YES | NO  |
| 1317 | Replication factor C subunit 4                                                          | RFC4     | 424958    | YES | NO  | NO  |
| 1318 | Replication protein A1                                                                  | RPA1     | 417563    | YES | NO  | YES |
| 1319 | Retention in endoplasmic reticulum sorting receptor 1                                   | RER1     | 419397    | YES | YES | NO  |
| 1320 | Reticulocalbin 1                                                                        | RCN1     | 428602    | NO  | YES | NO  |
| 1321 | Reticulon 4                                                                             | RTN4     | 378790    | YES | YES | NO  |
| 1322 | Retinoid X receptor alpha                                                               | RXRA     | 417143    | YES | NO  | NO  |
| 1323 | Retinol binding protein 4 A, plasma                                                     | RBP4A    | 396166    | YES | YES | YES |
| 1324 | Retinol dehydrogenase 16 (all-trans)                                                    | RDH16    | 776432    | YES | YES | NO  |
| 1325 | Rh family C glycoprotein                                                                | RHCG     | 415490    | NO  | YES | NO  |
| 1326 | Rh-associated glycoprotein                                                              | RHAG     | 395118    | NO  | NO  | YES |
| 1327 | Rho associated coiled-coil containing protein kinase 2                                  | ROCK2    | 374182    | NO  | YES | NO  |
| 1328 | Rho GDP dissociation inhibitor beta                                                     | ARHGDI2  | 417941    | NO  | YES | YES |

|      |                                                         |         |           |     |     |     |
|------|---------------------------------------------------------|---------|-----------|-----|-----|-----|
| 1329 | Rho GTPase activating protein 1                         | ARHGAP1 | 428865    | YES | YES | YES |
| 1330 | Rho-associated, coiled-coil containing protein kinase 1 | ROCK1   | 373970    | NO  | YES | NO  |
| 1331 | Rho-related GTP-binding protein RhoG-like               | RHOGL   | 422207    | YES | YES | NO  |
| 1332 | Riboflavin binding protein                              | RBP     | 396449    | YES | NO  | NO  |
| 1333 | Ribonuclease/angiogenin inhibitor 1                     | RNH1    | 423111    | YES | YES | NO  |
| 1334 | Ribophorin I                                            | RPN1    | 416017    | YES | YES | NO  |
| 1335 | Ribophorin II                                           | RPN2    | 419177    | YES | YES | NO  |
| 1336 | Ribosomal protein L3                                    | RPL3    | 418016    | YES | YES | NO  |
| 1337 | Ribosomal protein L4                                    | RPL4    | 415551    | YES | YES | NO  |
| 1338 | Ribosomal protein L5                                    | RPL5    | 395296    | YES | YES | YES |
| 1339 | Ribosomal protein L6                                    | RPL6    | 373957    | YES | YES | NO  |
| 1340 | Ribosomal protein L7                                    | RPL7    | 420182    | YES | YES | YES |
| 1341 | Ribosomal protein L7a                                   | RPL7A   | 417158    | YES | YES | NO  |
| 1342 | Ribosomal protein L8                                    | RPL8    | 418568    | YES | YES | YES |
| 1343 | Ribosomal protein L9                                    | RPL9    | 425468    | YES | YES | YES |
| 1344 | Ribosomal protein L10a                                  | RPL10A  | 419895    | YES | YES | YES |
| 1345 | Ribosomal protein L10-like                              | RPL10L  | 396411    | YES | NO  | NO  |
| 1346 | Ribosomal protein L11                                   | RPL11   | 419682    | YES | YES | YES |
| 1347 | Ribosomal protein L12                                   | RPL12   | 417264    | YES | YES | YES |
| 1348 | Ribosomal protein L13                                   | RPL13   | 395849    | YES | YES | NO  |
| 1349 | Ribosomal protein L13a                                  | RPL13a  | 560828    | YES | YES | NO  |
| 1350 | Ribosomal protein L14                                   | RPL14   | 374134    | YES | YES | NO  |
| 1351 | Ribosomal protein L15                                   | RPL15   | 428442    | YES | YES | NO  |
| 1352 | Ribosomal protein L17                                   | RPL17   | 426845    | YES | YES | NO  |
| 1353 | Ribosomal protein L18 (Fragment)                        | N/A     | N/A       | YES | YES | NO  |
| 1354 | Ribosomal protein L18a                                  | RPL18A  | 417823    | YES | YES | NO  |
| 1355 | Ribosomal protein L19                                   | RPL19   | 420003    | YES | NO  | NO  |
| 1356 | Ribosomal protein L21                                   | RPL21   | 418933    | YES | YES | NO  |
| 1357 | Ribosomal protein L22                                   | RPL22   | 373937    | YES | YES | YES |
| 1358 | Ribosomal protein L23                                   | RPL23   | 420001    | YES | YES | YES |
| 1359 | Ribosomal protein L23a                                  | RPL23A  | 417574    | YES | YES | NO  |
| 1360 | Ribosomal protein L24                                   | RPL24   | 418401    | YES | YES | YES |
| 1361 | Ribosomal protein L26 like 1                            | RPL26L1 | 396400    | YES | YES | NO  |
| 1362 | Ribosomal protein L27                                   | RPL27   | 396280    | YES | YES | YES |
| 1363 | Ribosomal protein L27a                                  | RPL27A  | 770018    | YES | YES | YES |
| 1364 | Ribosomal protein L28                                   | RPL28   | 107051012 | YES | YES | NO  |
| 1365 | Ribosomal protein L30                                   | RPL30   | 425416    | YES | YES | YES |
| 1366 | Ribosomal protein L31                                   | RPL31   | 418710    | YES | YES | NO  |
| 1367 | Ribosomal protein L35a                                  | RPL35A  | 424924    | NO  | YES | NO  |
| 1368 | Ribosomal protein L36                                   | RPL36   | 373936    | YES | YES | NO  |
| 1369 | Ribosomal protein lateral stalk subunit P0              | RPLP0   | 395835    | YES | YES | YES |
| 1370 | Ribosomal protein lateral stalk subunit P1              | RPLP1   | 396262    | YES | NO  | NO  |
| 1371 | Ribosomal protein lateral stalk subunit P2              | RPLP2   | 426492    | YES | YES | NO  |
| 1372 | Ribosomal protein S2                                    | RPS2    | 416544    | YES | YES | NO  |
| 1373 | Ribosomal protein S3                                    | RPS3    | 419069    | YES | YES | YES |
| 1374 | Ribosomal protein S3A                                   | RPS3A   | 422477    | YES | YES | YES |
| 1375 | Ribosomal protein S4,Y-linked 1                         | RPS4Y1  | 396001    | YES | YES | YES |
| 1376 | Ribosomal protein S6                                    | RPS6    | 396148    | YES | YES | NO  |

|      |                                                   |              |           |     |     |     |
|------|---------------------------------------------------|--------------|-----------|-----|-----|-----|
| 1377 | Ribosomal protein S6 kinase A3                    | RPS6KA3      | 418605    | NO  | YES | NO  |
| 1378 | Ribosomal protein S7                              | RPS7         | 421919    | YES | YES | YES |
| 1379 | Ribosomal protein S8                              | RPS8         | 424584    | YES | YES | YES |
| 1380 | Ribosomal protein S10                             | RPS10        | 419904    | YES | YES | YES |
| 1381 | Ribosomal protein S11                             | RPS11        | 419049    | YES | YES | NO  |
| 1382 | Ribosomal protein S12                             | RPS12        | 421698    | YES | YES | NO  |
| 1383 | Ribosomal protein S13                             | RPS13        | 414782    | YES | YES | YES |
| 1384 | Ribosomal protein S14                             | RPS14        | 416275    | YES | YES | NO  |
| 1385 | Ribosomal protein S15a                            | RPS15A       | 427675    | YES | YES | NO  |
| 1386 | Ribosomal protein S16                             | RPS16        | 417871    | YES | YES | YES |
| 1387 | Ribosomal protein S17                             | RPS17        | 374053    | YES | YES | NO  |
| 1388 | Ribosomal protein S19                             | RPS19        | 107050719 | YES | YES | NO  |
| 1389 | Ribosomal protein S20                             | RPS20        | 430990    | YES | YES | YES |
| 1390 | Ribosomal protein S23                             | RPS23        | 427323    | YES | YES | YES |
| 1391 | Ribosomal protein S24                             | RPS24        | 423726    | YES | NO  | NO  |
| 1392 | Ribosomal protein S25                             | RPS25        | 770722    | YES | YES | YES |
| 1393 | Ribosomal protein S26                             | RPS26        | 100857770 | YES | YES | YES |
| 1394 | Ribosomal protein S27a                            | RPS27A       | 395796    | YES | YES | YES |
| 1395 | Ribosomal protein SA pseudogene 58                | RPSAP58      | 395181    | YES | YES | YES |
| 1396 | Ribosomal RNA processing 12 homolog               | RRP12        | 423845    | YES | NO  | NO  |
| 1397 | Ribosome binding protein 1                        | RRBP1        | 396414    | YES | YES | NO  |
| 1398 | RIMS-binding protein 3A-like                      | RIMSBP3AL    | 101748341 | NO  | NO  | YES |
| 1399 | RNA 2',3'-cyclic phosphate and 5'-OH ligase       | RTCA         | 418064    | YES | YES | YES |
| 1400 | RNA 3'-terminal phosphate cyclase                 | RTCA         | 424468    | YES | YES | YES |
| 1401 | RNA binding motif (RNP1, RRM) protein 3           | RBM3         | 425789    | YES | YES | YES |
| 1402 | RNA binding motif protein 12                      | RBM12        | 404531    | YES | YES | YES |
| 1403 | RNA binding motif protein 15B                     | RBM15B       | 770664    | YES | YES | NO  |
| 1404 | RNA binding motif protein 24                      | RBM24        | 420846    | NO  | NO  | YES |
| 1405 | RNA binding motif protein 25                      | RBM25        | 423250    | YES | YES | NO  |
| 1406 | RNA binding motif protein, X-linked like 1        | RBMXL1       | 422248    | YES | YES | YES |
| 1407 | RNA guanine-7 methyltransferase                   | RNMT         | 421046    | YES | YES | NO  |
| 1408 | RNA polymerase II subunit B                       | POLR2B       | 422621    | NO  | NO  | YES |
| 1409 | RNA polymerase II subunit H                       | POLR2H       | 424954    | YES | YES | NO  |
| 1410 | RNA-binding protein 4B-like                       | LOC100859276 | 100859276 | YES | NO  | YES |
| 1411 | RTN3w                                             | RTN3         | 431037    | YES | YES | NO  |
| 1412 | RuvB like AAA ATPase 1                            | RUVBL1       | 416022    | YES | YES | YES |
| 1413 | RuvB-like 2                                       | LOC107051177 | 107051177 | YES | YES | YES |
| 1414 | S100 calcium binding protein A11                  | S100A11      | 396075    | YES | YES | NO  |
| 1415 | S100 calcium binding protein A12                  | S100A12      | 426356    | YES | YES | NO  |
| 1416 | S100 calcium binding protein A16                  | S100A16      | 100859094 | NO  | YES | NO  |
| 1417 | SAC1 suppressor of actin mutations 1-like (yeast) | SACM1L       | 420700    | YES | YES | YES |
| 1418 | Saccharopine dehydrogenase (putative)             | SCCPDH       | 421485    | YES | YES | NO  |
| 1419 | SAMM50 sorting and assembly machinery component   | SAMM50       | 418234    | YES | YES | NO  |
| 1420 | SAP domain containing ribonucleoprotein           | SARNP        | 425058    | YES | NO  | YES |
| 1421 | Sarcosine dehydrogenase                           | SARDH        | 417146    | YES | NO  | NO  |
| 1422 | Scinderin                                         | SCIN         | 420588    | YES | YES | NO  |
| 1423 | SCO2, cytochrome c oxidase assembly protein       | SCO2         | 429671    | NO  | YES | NO  |
| 1424 | Sec1 family domain containing 1                   | SCFD1        | 423307    | YES | YES | NO  |

|      |                                                                                     |              |           |     |     |     |
|------|-------------------------------------------------------------------------------------|--------------|-----------|-----|-----|-----|
| 1425 | SEC11 homolog C, signal peptidase complex subunit                                   | SEC11C       | 426850    | NO  | YES | NO  |
| 1426 | SEC22 homolog B, vesicle trafficking protein                                        | SEC22B       | 424377    | YES | YES | YES |
| 1427 | SEC23 homolog A, coat complex II component                                          | SEC23A       | 423335    | YES | YES | NO  |
| 1428 | SEC24 homolog C, COPII coat complex component                                       | SEC24C       | 423742    | YES | NO  | NO  |
| 1429 | SEC31 homolog B, COPII coat complex component                                       | SEC31B       | 423764    | NO  | NO  | YES |
| 1430 | SEC61 translocon alpha 1 subunit                                                    | SEC61A1      | 416023    | YES | YES | NO  |
| 1431 | Secreted protein acidic and cysteine rich                                           | SPARC        | 386571    | YES | NO  | NO  |
| 1432 | Secretion associated Ras related GTPase 1A                                          | SAR1A        | 423711    | YES | YES | NO  |
| 1433 | Secretory carrier membrane protein 2                                                | SCAMP2       | 769853    | YES | YES | YES |
| 1434 | SEH1 like nucleoporin                                                               | SEH1L        | 100859886 | YES | YES | NO  |
| 1435 | Selenium binding protein 1                                                          | SELENBP1     | 425664    | YES | YES | YES |
| 1436 | Selenocysteine lyase                                                                | SCLY         | 424739    | YES | NO  | NO  |
| 1437 | Selenophosphate synthetase 1                                                        | SEPHS1       | 426612    | YES | YES | NO  |
| 1438 | Septapterin reductase (7,8-dihydrobiopterin:NADP+ oxidoreductase)                   | SPR          | 425255    | YES | YES | NO  |
| 1439 | Septin 2                                                                            | SEPT2        | 424843    | YES | YES | YES |
| 1440 | Septin 2-like                                                                       | SEPT2L       | 416777    | YES | YES | NO  |
| 1441 | Septin 6                                                                            | SEPT6        | 422369    | YES | YES | NO  |
| 1442 | Septin 7                                                                            | SEPT7        | 420741    | YES | YES | NO  |
| 1443 | Septin 8                                                                            | SEPTIN8      | 416333    | YES | YES | NO  |
| 1444 | Septin 9                                                                            | SEPTIN9      | 417347    | YES | YES | NO  |
| 1445 | Septin 11                                                                           | SEPTIN11     | 422635    | YES | YES | NO  |
| 1446 | Serine and arginine rich splicing factor 1                                          | SRSF1        | 772264    | YES | YES | YES |
| 1447 | Serine and arginine rich splicing factor 2                                          | SRSF2        | 396195    | YES | YES | YES |
| 1448 | Serine and arginine rich splicing factor 3                                          | SRSF3        | 419815    | YES | YES | YES |
| 1449 | Serine and arginine rich splicing factor 6                                          | SRSF6        | 419116    | YES | YES | YES |
| 1450 | Serine and arginine rich splicing factor 7                                          | SRSF7        | 100859609 | YES | YES | YES |
| 1451 | Serine carboxypeptidase 1                                                           | SCPEP1       | 417403    | YES | YES | NO  |
| 1452 | Serine peptidase inhibitor, Kazal type 5                                            | SPINK5       | 416235    | YES | YES | NO  |
| 1453 | Serine peptidase inhibitor, Kazal type 7 (putative)                                 | SPINK7       | 416236    | YES | YES | NO  |
| 1454 | Serine peptidase inhibitor, Kunitz type 4                                           | SPINT4       | 101751715 | NO  | YES | NO  |
| 1455 | Serine/threonine kinase 25                                                          | STK25        | 378801    | NO  | YES | NO  |
| 1456 | Serine/threonine kinase receptor associated protein                                 | STRAP        | 418175    | YES | YES | YES |
| 1457 | Serine/threonine protein kinase 26                                                  | STK26        | 422231    | NO  | NO  | YES |
| 1458 | Serine/threonine-protein phosphatase 2A 65 kDa regulatory subunit A alpha isoform   | LOC107050599 | 107050599 | YES | NO  | NO  |
| 1459 | Serologically defined colon cancer antigen 8                                        | SDCCAG8      | 421498    | YES | NO  | NO  |
| 1460 | Serpin family B member 1                                                            | SERPINB1     | 420894    | NO  | YES | NO  |
| 1461 | Serpin family B member 2                                                            | SERPINB2     | 420896    | NO  | YES | NO  |
| 1462 | Serpin family B member 5                                                            | SERPINB5     | 420900    | NO  | YES | NO  |
| 1463 | Serpin family F member 2                                                            | SERPINF2     | 100857105 | NO  | YES | YES |
| 1464 | Serpin family H member 1                                                            | SERPINH1     | 396228    | YES | YES | NO  |
| 1465 | Serpin peptidase inhibitor, clade A (alpha-1 antiproteinase, antitrypsin), member 1 | SPIA1        | 423434    | NO  | NO  | YES |
| 1466 | Serpin peptidase inhibitor, clade A (alpha-1 antiproteinase, antitrypsin), member 4 | SPIA4        | 423433    | YES | YES | YES |
| 1467 | Serpin peptidase inhibitor, clade B (ovalbumin), member 10 B                        | SERPINB10B   | 395715    | NO  | YES | NO  |
| 1468 | Serpin peptidase inhibitor, clade B (ovalbumin), member 6                           | SERPINB6     | 420895    | YES | YES | NO  |
| 1469 | Serpin peptidase inhibitor, clade C (antithrombin), member 1                        | SERPINC1     | 424440    | NO  | NO  | YES |
| 1470 | Serpin peptidase inhibitor, clade D (heparin cofactor), member 1                    | SERPIND1     | 395877    | NO  | NO  | YES |
| 1471 | SERPINE1 mRNA binding protein 1                                                     | SERBP1       | 424706    | YES | NO  | NO  |
| 1472 | Seryl-tRNA synthetase 1                                                             | SARS1        | 426697    | YES | YES | YES |

|      |                                                                                                                                        |            |        |     |     |     |
|------|----------------------------------------------------------------------------------------------------------------------------------------|------------|--------|-----|-----|-----|
| 1473 | SET nuclear proto-oncogene                                                                                                             | SET        | 417210 | YES | YES | YES |
| 1474 | SH3 domain binding glutamate rich protein like                                                                                         | SH3BGRL    | 422277 | YES | YES | NO  |
| 1475 | SH3 domain containing GRB2 like 1, endophilin A2                                                                                       | SH3GL1     | 395202 | YES | YES | NO  |
| 1476 | SH3 domain containing GRB2 like endophilin B1                                                                                          | SH3GLB1    | 424522 | YES | NO  | NO  |
| 1477 | Shootin 1                                                                                                                              | SHTN1      | 423919 | YES | YES | NO  |
| 1478 | Sideroflexin 2                                                                                                                         | SFXN2      | 423866 | YES | YES | NO  |
| 1479 | Sideroflexin 3                                                                                                                         | SFXN3      | 428972 | YES | YES | NO  |
| 1480 | Signal peptidase complex subunit 3                                                                                                     | SPCS3      | 396234 | YES | YES | NO  |
| 1481 | Signal sequence receptor subunit 1                                                                                                     | SSR1       | 420871 | YES | YES | NO  |
| 1482 | Signal transducer and activator of transcription 3                                                                                     | STAT3      | 420027 | YES | YES | NO  |
| 1483 | Similar to Ciliogenesis and planar polarity effector 1 [ <i>Parabassia ranga</i> (Indian glassy fish) ]                                | CPLANE1    | N/A    | NO  | YES | YES |
| 1484 | Similar to General transcription factor II-I repeat domain-containing protein 2-like [ <i>Xiphophorus hellerii</i> (green swordtail) ] | N/A        | N/A    | NO  | NO  | YES |
| 1485 | Similar to Eukaryotic translation initiation factor 3 subunit K [ <i>Numida meleagris</i> (helmeted guineafowl) ]                      | EIF3K      | N/A    | YES | YES | NO  |
| 1486 | Similar to HEAT repeat protein [ <i>Ancylostoma ceylanicum</i> ]                                                                       | N/A        | N/A    | YES | YES | NO  |
| 1487 | Similar to Host cell factor 1-like [ <i>Apteryx mantelli mantelli</i> ]                                                                | N/A        | N/A    | NO  | NO  | YES |
| 1488 | Similar to Hydroxyacyl-CoA dehydrogenase trifunctional multienzyme complex subunit beta [ <i>Meleagris gallopavo</i> (turkey) ]        | HADHB      | N/A    | YES | YES | YES |
| 1489 | Similar to KRAS proto-oncogene, GTPase [ <i>Pelodiscus sinensis</i> (Chinese soft-shelled turtle) ]                                    | KRAS       | N/A    | NO  | YES | NO  |
| 1490 | Similar to Myeloid-associated differentiation marker homolog [ <i>Phasianus colchicus</i> (Ring-necked pheasant) ]                     | N/A        | N/A    | YES | YES | NO  |
| 1491 | Similar to Plectin a [ <i>Danio rerio</i> (zebrafish) ]                                                                                | PLECA      | N/A    | YES | YES | NO  |
| 1492 | Similar to Protein phosphatase 4, catalytic subunit b [ <i>Danio rerio</i> (zebrafish) ]                                               | PPP4CB     | N/A    | YES | YES | NO  |
| 1493 | Similar to Proteasome 26S subunit, ATPase 4 [ <i>Danio rerio</i> (zebrafish) ]                                                         | PSMC4      | N/A    | YES | NO  | NO  |
| 1494 | Similar to protein S100-A12-like [ <i>Coturnix japonica</i> (Japanese quail) ]                                                         | N/A        | N/A    | YES | YES | NO  |
| 1495 | Similar to RAB29, member RAS oncogene family [ <i>Anas platyrhynchos</i> (mallard) ]                                                   | RAB29      | N/A    | NO  | YES | NO  |
| 1496 | Similar to Rho GDP dissociation inhibitor alpha [ <i>Meleagris gallopavo</i> (turkey) ]                                                | ARHGDI A   | N/A    | YES | YES | YES |
| 1497 | Similar to Ribosomal protein S9 of Zebrafish                                                                                           | RPS9       | N/A    | YES | YES | NO  |
| 1498 | Similar to Ribosomal protein S18 of Zebrafish                                                                                          | RBS18      | N/A    | YES | YES | YES |
| 1499 | Similar to TRAF2 and NCK interacting kinase b of zebrafish                                                                             | TNIKB      | N/A    | NO  | NO  | YES |
| 1500 | Similar to Ubiquitin like modifier activating enzyme 1 [ <i>Corvus moneduloides</i> (New Caledonian crow) ]                            | UBA1       | N/A    | YES | YES | YES |
| 1501 | Similar to Ubiquitin-like modifier activating enzyme 1 [ <i>Danio rerio</i> (zebrafish) ]                                              | UBA1       | N/A    | YES | YES | NO  |
| 1502 | Similar to Ubiquitin protein ligase E3 component n-recogin 4 of human                                                                  | UBR4       | N/A    | NO  | NO  | YES |
| 1503 | Similar to Zinc finger MYM-type protein 1-like [ <i>Rhopalosiphum maidis</i> (corn leaf aphid) ]                                       | N/A        | N/A    | NO  | YES | NO  |
| 1504 | Similar to YKT6 v-SNARE homolog ( <i>S. cerevisiae</i> )                                                                               | YKT6       | N/A    | YES | YES | YES |
| 1505 | Similar to Zgc:153322 [ <i>Danio rerio</i> (zebrafish) ]                                                                               | zgc:153322 | N/A    | YES | YES | YES |
| 1506 | Sin3A associated protein 18                                                                                                            | SAP18      | 374206 | YES | YES | YES |
| 1507 | Single stranded DNA binding protein 1                                                                                                  | SSBP1      | 418122 | NO  | YES | NO  |
| 1508 | Sirtuin 2                                                                                                                              | SIRT2      | 548628 | YES | YES | NO  |
| 1509 | Sirtuin 5                                                                                                                              | SIRT5      | 420834 | YES | YES | NO  |
| 1510 | Sjogren syndrome antigen B                                                                                                             | SSB        | 395268 | YES | YES | YES |
| 1511 | SLC9A3 regulator 1                                                                                                                     | SLC9A3R1   | 422108 | YES | YES | NO  |
| 1512 | SLC9A3 regulator 2                                                                                                                     | SLC9A3R2   | 416550 | NO  | YES | NO  |



|      |                                                                |          |           |     |     |     |
|------|----------------------------------------------------------------|----------|-----------|-----|-----|-----|
| 1513 | Small glutamine rich tetratricopeptide repeat containing alpha | SGTA     | 426396    | YES | NO  | NO  |
| 1514 | Small nuclear ribonucleoprotein D2 polypeptide                 | SNRPD2   | 107049207 | NO  | YES | YES |
| 1515 | Small nuclear ribonucleoprotein D3 polypeptide                 | SNRPD3   | 416947    | YES | YES | YES |
| 1516 | Small nuclear ribonucleoprotein polypeptide A                  | SNRPA1   | 415523    | YES | YES | YES |
| 1517 | Small nuclear ribonucleoprotein polypeptide E                  | SNRPE    | 396180    | NO  | NO  | YES |
| 1518 | Small nuclear ribonucleoprotein polypeptide N                  | SNRPN    | 395298    | YES | NO  | YES |
| 1519 | Small nuclear ribonucleoprotein U5 200kDa subunit              | SNRNP200 | 503574    | YES | YES | YES |
| 1520 | Small ubiquitin-related modifier 1 precursor                   | SUMO1    | 373930    | NO  | YES | NO  |
| 1521 | SNU13 homolog, small nuclear ribonucleoprotein (U4/U6.U5)      | SNU13    | 417986    | YES | NO  | NO  |
| 1522 | Solute carrier family 16 member 1                              | SLC16A1  | 419875    | YES | YES | YES |
| 1523 | Solute carrier family 16 member 7                              | SLC16A7  | 417815    | NO  | YES | NO  |
| 1524 | Solute carrier family 25 member 1                              | SLC25A1  | 416764    | YES | YES | NO  |
| 1525 | Solute carrier family 25 member 3                              | SLC25A3  | 417924    | YES | YES | YES |
| 1526 | Solute carrier family 25 member 4                              | SLC25A4  | 422546    | YES | YES | NO  |
| 1527 | Solute carrier family 25 member 5                              | SLC25A5  | 772225    | YES | YES | YES |
| 1528 | Solute carrier family 25 member 6                              | SLC25A6  | 374072    | YES | YES | NO  |
| 1529 | Solute carrier family 25 member 10                             | SLC25A10 | 769048    | NO  | YES | NO  |
| 1530 | Solute carrier family 25 member 11                             | SLC25A11 | 107049718 | YES | YES | NO  |
| 1531 | Solute carrier family 25 member 13                             | SLC25A13 | 428427    | YES | YES | NO  |
| 1532 | Solute carrier family 25 member 20                             | SLC25A20 | 416062    | YES | YES | NO  |
| 1533 | Solute carrier family 25 member 24                             | SLC25A24 | 424337    | YES | YES | YES |
| 1534 | Solute carrier family 27 member 4                              | SLC27A4  | 417220    | YES | YES | NO  |
| 1535 | Solute carrier family 29 member 1 (Augustine blood group)      | SLC29A1  | 421439    | NO  | NO  | YES |
| 1536 | Solute carrier family 4 member 1 (Diego blood group)           | SLC4A1   | 396532    | YES | YES | YES |
| 1537 | Solute carrier family 43 member 3                              | SLC43A3  | 423133    | YES | YES | YES |
| 1538 | Solute carrier family 44 (choline transporter), member 1       | SLC44A1  | 427301    | YES | NO  | NO  |
| 1539 | Sorcin                                                         | SRI      | 420538    | YES | YES | YES |
| 1540 | Sorting nexin 2                                                | SNX2     | 426797    | YES | YES | YES |
| 1541 | Sorting nexin 3                                                | SNX3     | 421772    | YES | YES | NO  |
| 1542 | Sorting nexin 4                                                | SNX4     | 424260    | YES | YES | NO  |
| 1543 | Sorting nexin 12                                               | SNX12    | 428704    | YES | YES | YES |
| 1544 | Sorting nexin 32                                               | SNX32    | 771038    | YES | YES | NO  |
| 1545 | Spectrin alpha, non-erythrocytic 1                             | SPTAN1   | 374234    | YES | YES | YES |
| 1546 | Spectrin beta, erythrocytic                                    | SPTB     | 769410    | YES | YES | YES |
| 1547 | Spectrin beta, non-erythrocytic 1                              | SPTBN1   | 421216    | YES | YES | YES |
| 1548 | Sperm associated antigen 9                                     | SPAG9    | 422095    | NO  | NO  | YES |
| 1549 | Spermidine synthase                                            | SRM      | 771447    | YES | YES | NO  |
| 1550 | S-phase kinase-associated protein 1                            | SKP1     | 416319    | YES | YES | NO  |
| 1551 | Splicing factor 3a subunit 1                                   | SF3A1    | 427717    | YES | NO  | YES |
| 1552 | Splicing factor 3a subunit 3                                   | SF3A3    | 419608    | YES | NO  | NO  |
| 1553 | Splicing factor 3b subunit 1                                   | SF3B1    | 424056    | YES | NO  | YES |
| 1554 | Splicing factor 3b subunit 3                                   | SF3B3    | 415680    | YES | YES | NO  |
| 1555 | Splicing factor 3b subunit 6                                   | SF3B6    | 421976    | NO  | YES | NO  |
| 1556 | Splicing factor proline and glutamine rich                     | SFPQ     | 395803    | YES | YES | YES |
| 1557 | SPRY domain containing 7                                       | SPRYD7   | 418871    | YES | YES | NO  |
| 1558 | SPT5 homolog, DSIF elongation factor subunit                   | SUPT5H   | 426493    | NO  | NO  | YES |
| 1559 | SRC proto-oncogene, non-receptor tyrosine kinase               | SRC      | 396442    | YES | YES | NO  |
| 1560 | Staphylococcal nuclease and tudor domain containing            | SND1     | 107050735 | YES | YES | NO  |

|      |                                                                                                   |           |           |     |     |     |
|------|---------------------------------------------------------------------------------------------------|-----------|-----------|-----|-----|-----|
| 1561 | Stathmin 1                                                                                        | STMN1     | 396057    | YES | YES | NO  |
| 1562 | STE20 like kinase                                                                                 | SLK       | 423878    | NO  | YES | NO  |
| 1563 | STEAP4 metalloredutcase                                                                           | STEAP4    | 772063    | NO  | YES | NO  |
| 1564 | Sterol carrier protein 2                                                                          | SCP2      | 396550    | NO  | YES | NO  |
| 1565 | Stomatin                                                                                          | STOM      | 417118    | YES | YES | YES |
| 1566 | Stratifin                                                                                         | SFN       | 408037    | YES | YES | NO  |
| 1567 | Stress induced phosphoprotein 1                                                                   | STIP1     | 101748085 | YES | YES | YES |
| 1568 | Stromal antigen 2                                                                                 | STAG2     | 422360    | NO  | NO  | YES |
| 1569 | Structural maintenance of chromosomes 1A                                                          | SMC1A     | 395187    | YES | YES | YES |
| 1570 | Structural maintenance of chromosomes 2                                                           | SMC2      | 396156    | NO  | NO  | YES |
| 1571 | Structural maintenance of chromosomes 3                                                           | SMC3      | 395188    | YES | YES | YES |
| 1572 | Structural maintenance of chromosomes 4                                                           | SMC4      | 395189    | YES | NO  | YES |
| 1573 | STT3A, catalytic subunit of the oligosaccharyltransferase complex                                 | STT3A     | 100857165 | YES | YES | NO  |
| 1574 | Succinate dehydrogenase complex flavoprotein subunit A                                            | SDHA      | 395758    | YES | YES | NO  |
| 1575 | Succinate dehydrogenase complex iron sulfur subunit B                                             | SDHB      | 100859720 | YES | YES | NO  |
| 1576 | Succinate-CoA ligase ADP-forming beta subunit                                                     | SUCLA2    | 418857    | YES | YES | NO  |
| 1577 | Succinate-CoA ligase GDP-forming beta subunit                                                     | SUCLG2    | 416087    | NO  | YES | NO  |
| 1578 | Sulfite oxidase                                                                                   | SUOX      | 107055404 | NO  | NO  | YES |
| 1579 | Sulfotransferase family 1C member 3                                                               | SULT1C3   | 395300    | YES | YES | NO  |
| 1580 | Sulfotransferase family 1E member 1                                                               | SULT1E1   | 422662    | YES | NO  | NO  |
| 1581 | Sulfotransferase family cytosolic 1B member 1                                                     | SULT1B1   | 395227    | YES | YES | NO  |
| 1582 | Sulfotransferase family cytosolic 2B member 1-like                                                | LOC415852 | 415852    | YES | YES | NO  |
| 1583 | SUMO1 activating enzyme subunit 1                                                                 | SAE1      | 101750090 | YES | YES | NO  |
| 1584 | SUN domain containing ossification factor                                                         | SUCO      | 424385    | NO  | YES | NO  |
| 1585 | Superoxide dismutase 1, soluble                                                                   | SOD1      | 395938    | YES | YES | YES |
| 1586 | Superoxide dismutase 2, mitochondrial                                                             | SOD2      | 374042    | YES | YES | YES |
| 1587 | Supervillin                                                                                       | SVIL      | 420475    | YES | NO  | NO  |
| 1588 | Suppression of tumorigenicity 13 (colon carcinoma) (Hsp70 interacting protein) pseudogene 5       | ST13P5    | 418003    | YES | YES | YES |
| 1589 | Surfeit 4                                                                                         | SURF4     | 374273    | YES | YES | NO  |
| 1590 | Survival motor neuron domain containing 1                                                         | SMNDC1    | 423889    | NO  | NO  | YES |
| 1591 | SWI/SNF related, matrix associated, actin dependent regulator of chromatin, subfamily a, member 5 | SMARCA5   | 422457    | YES | NO  | NO  |
| 1592 | SWI/SNF related, matrix associated, actin dependent regulator of chromatin, subfamily e, member 1 | SMARCE1   | 420047    | YES | NO  | NO  |
| 1593 | Switching B cell complex subunit SWAP70                                                           | SWAP70    | 423044    | YES | NO  | NO  |
| 1594 | Synaptogyrin 1                                                                                    | SYNGR1    | 418015    | NO  | YES | NO  |
| 1595 | Synaptogyrin 2                                                                                    | SYNGR2    | 100859110 | YES | YES | NO  |
| 1596 | Synaptosome associated protein 23                                                                 | SNAP23    | 423235    | YES | YES | YES |
| 1597 | Synaptosome associated protein 91                                                                 | SNAP91    | 428635    | YES | NO  | NO  |
| 1598 | Synaptotagmin binding cytoplasmic RNA interacting protein                                         | SYNCRIP   | 421831    | YES | YES | NO  |
| 1599 | Synemin                                                                                           | SYNM      | 395599    | NO  | NO  | YES |
| 1600 | Syntaxin 7                                                                                        | STX7      | 426930    | YES | NO  | NO  |
| 1601 | Syntaxin binding protein 1                                                                        | STXBP1    | 404293    | YES | YES | NO  |
| 1602 | Talin 1                                                                                           | TLN1      | 395194    | YES | YES | YES |
| 1603 | Talin 2                                                                                           | TLN2      | 415374    | NO  | YES | YES |
| 1604 | Tandem PRG2/PRG3 gene pair                                                                        | PGR2/3    | 423134    | YES | YES | NO  |
| 1605 | TBC1 domain family member 2B                                                                      | TBC1D2B   | 415364    | YES | NO  | NO  |

|      |                                                      |              |           |     |     |     |
|------|------------------------------------------------------|--------------|-----------|-----|-----|-----|
| 1606 | t-complex 1                                          | TCP1         | 421586    | YES | YES | YES |
| 1607 | Tenascin XB                                          | LOC427816    | 427816    | NO  | YES | NO  |
| 1608 | Tensin 1                                             | TNS1         | 396439    | NO  | YES | NO  |
| 1609 | Testin LIM domain protein                            | TES          | 395332    | YES | YES | NO  |
| 1610 | Tetraspanin 8                                        | TSPAN8       | 417854    | NO  | YES | NO  |
| 1611 | Tetratricopeptide repeat domain 17                   | TTC17        | 423167    | NO  | NO  | YES |
| 1612 | Tetratricopeptide repeat domain 37                   | TTC37        | 427114    | NO  | YES | YES |
| 1613 | Tetratricopeptide repeat domain 38                   | TTC38        | 426193    | YES | YES | YES |
| 1614 | Thimet oligopeptidase 1                              | THOP1        | 426398    | YES | YES | NO  |
| 1615 | Thiopurine S-methyltransferase                       | TPMT         | 420830    | YES | NO  | YES |
| 1616 | Thioredoxin                                          | TXN          | 396437    | NO  | NO  | YES |
| 1617 | Thioredoxin domain containing 12                     | TXNDC12      | 772208    | YES | NO  | NO  |
| 1618 | Thioredoxin domain containing 17                     | TXNDC17      | 417680    | YES | YES | NO  |
| 1619 | Thioredoxin domain containing 5                      | TXNDC5       | 420867    | YES | YES | NO  |
| 1620 | Thioredoxin like 1                                   | TXNL1        | 426854    | YES | YES | YES |
| 1621 | Thioredoxin related transmembrane protein 3          | TMX3         | 421027    | YES | YES | NO  |
| 1622 | Thioredoxin related transmembrane protein 4          | TMX4         | 416729    | YES | YES | YES |
| 1623 | Thiosulfate sulfurtransferase                        | TST          | 418049    | YES | YES | NO  |
| 1624 | THO complex 7                                        | THOC7        | 416077    | YES | NO  | NO  |
| 1625 | Threonyl-tRNA synthetase                             | TARS         | 427427    | YES | YES | YES |
| 1626 | Thy-1 cell surface antigen                           | THY1         | 378897    | YES | YES | NO  |
| 1627 | Thymocyte nuclear protein 1                          | THYN1        | 374161    | YES | YES | NO  |
| 1628 | Thymopoietin                                         | TMPO         | 417923    | NO  | NO  | YES |
| 1629 | Thyroid hormone receptor associated protein 3        | THRAP3       | 419623    | NO  | NO  | YES |
| 1630 | TIMP metalloproteinase inhibitor 3                   | TIMP3        | 396483    | NO  | YES | NO  |
| 1631 | Tissue specific transplantation antigen P35B         | TSTA3        | 420292    | YES | NO  | NO  |
| 1632 | Titin                                                | TTN          | 424126    | YES | YES | YES |
| 1633 | Topoisomerase (DNA) II beta                          | TOP2B        | 395966    | YES | NO  | YES |
| 1634 | Trafficking protein particle complex 3               | TRAPPC3      | 419625    | YES | YES | NO  |
| 1635 | Trafficking protein particle complex 4               | TRAPPC4      | 419788    | NO  | YES | NO  |
| 1636 | Trafficking protein particle complex 5               | TRAPPC5      | 100858483 | YES | YES | NO  |
| 1637 | Trafficking protein particle complex 11              | TRAPPC11     | 428748    | NO  | YES | NO  |
| 1638 | Transaldolase 1                                      | TALDO1       | 423019    | YES | YES | YES |
| 1639 | Transcription elongation factor A1                   | TCEA1        | 421119    | NO  | NO  | YES |
| 1640 | Transcription elongation regulator 1                 | TCERG1       | 416349    | YES | YES | YES |
| 1641 | Transcription factor A, mitochondrial                | TFAM         | 373888    | YES | YES | NO  |
| 1642 | Transcriptional activator protein Pur-beta-like      | LOC107049543 | 107049543 | NO  | NO  | YES |
| 1643 | Transferrin (ovotransferrin)                         | TF           | 396241    | YES | YES | YES |
| 1644 | Transferrin receptor                                 | TFRC         | 396191    | YES | YES | YES |
| 1645 | Transformer 2 alpha homolog                          | TRA2A        | 420618    | YES | YES | YES |
| 1646 | Transformer 2 beta homolog                           | TRA2B        | 395403    | NO  | NO  | YES |
| 1647 | Transforming growth factor beta induced              | TGFBI        | 395897    | YES | NO  | NO  |
| 1648 | Transgelin                                           | TAGLN        | 396490    | YES | YES | NO  |
| 1649 | Transglutaminase 2                                   | TGM2         | 396432    | YES | YES | YES |
| 1650 | Transglutaminase 4                                   | TGM4         | 420706    | NO  | YES | NO  |
| 1651 | Transketolase like 1                                 | TKTL1        | 415991    | YES | YES | YES |
| 1652 | Translin                                             | TSN          | 395955    | YES | YES | YES |
| 1653 | Translocated promoter region, nuclear basket protein | TPR          | 424457    | YES | NO  | YES |

|      |                                                                                |              |           |     |     |     |
|------|--------------------------------------------------------------------------------|--------------|-----------|-----|-----|-----|
| 1654 | Translocation associated membrane protein 1-like 1                             | TRAM1L1      | 378918    | YES | NO  | NO  |
| 1655 | Translocator protein                                                           | TSPO         | 418226    | NO  | YES | NO  |
| 1656 | Translocator protein 2                                                         | TSPO2        | 419914    | NO  | YES | NO  |
| 1657 | Transmembrane 9 superfamily member 2-like                                      | TM9SF2L      | 422249    | YES | NO  | NO  |
| 1658 | Transmembrane 9 superfamily member 3                                           | TM9SF3       | 395460    | YES | YES | NO  |
| 1659 | Transmembrane and coiled-coil domains 1                                        | TMCO1        | 427100    | YES | YES | NO  |
| 1660 | Transmembrane emp24 domain-containing protein 4-like                           | LOC107049088 | 107049088 | YES | YES | NO  |
| 1661 | Transmembrane p24 trafficking protein 5                                        | TMED5        | 424499    | YES | YES | NO  |
| 1662 | Transmembrane p24 trafficking protein 7                                        | TMED7        | 769360    | YES | YES | NO  |
| 1663 | Transmembrane p24 trafficking protein 10                                       | TMED10       | 423362    | YES | YES | NO  |
| 1664 | Transmembrane protein 11                                                       | TMEM11       | 427663    | YES | YES | NO  |
| 1665 | Transmembrane protein 33                                                       | TMEM33       | 422779    | YES | YES | NO  |
| 1666 | Transmembrane protein 65                                                       | TMEM65       | 428387    | NO  | YES | NO  |
| 1667 | Transmembrane protein 245                                                      | TMEM245      | 420957    | NO  | YES | NO  |
| 1668 | Transportin 1                                                                  | TNPO1        | 427218    | YES | NO  | NO  |
| 1669 | Transthyretin                                                                  | TTR          | 396277    | YES | YES | YES |
| 1670 | Trimethyllysine hydroxylase, epsilon                                           | TMLHE        | 422296    | YES | YES | YES |
| 1671 | Triosephosphate isomerase 1                                                    | TPI1         | 396435    | YES | YES | YES |
| 1672 | Tripeptidyl peptidase 2                                                        | TPP2         | 428020    | YES | YES | YES |
| 1673 | tRNA nucleotidyl transferase 1                                                 | TRNT1        | 416103    | YES | NO  | YES |
| 1674 | Tropomodulin 3                                                                 | TMOD3        | 415421    | YES | YES | NO  |
| 1675 | Tropomyosin 1                                                                  | TPM1         | 396366    | YES | YES | NO  |
| 1676 | Tropomyosin 2                                                                  | TPM2         | 396430    | YES | YES | YES |
| 1677 | Tropomyosin 3                                                                  | TPM3         | 770103    | YES | YES | YES |
| 1678 | Tropomyosin 4                                                                  | TPM4         | 107055375 | YES | YES | NO  |
| 1679 | Tryptophanyl-tRNA synthetase                                                   | WARS         | 423458    | YES | YES | NO  |
| 1680 | Tu translation elongation factor, mitochondrial                                | TUFM         | 430889    | YES | YES | YES |
| 1681 | Tubulin alpha 1a                                                               | TUBA1A       | 429035    | YES | YES | YES |
| 1682 | Tubulin alpha 4a                                                               | TUBA4A       | 100857247 | YES | YES | YES |
| 1683 | Tubulin alpha like 3                                                           | TUBAL3       | 416694    | YES | NO  | NO  |
| 1684 | Tubulin beta 1 class VI                                                        | TUBB1        | 396427    | YES | YES | YES |
| 1685 | Tubulin beta 2B class IIb                                                      | TUBB2B       | 420883    | YES | YES | NO  |
| 1686 | Tubulin beta 3 class III                                                       | TUBB3        | 431043    | NO  | YES | NO  |
| 1687 | Tubulin beta 4B class IVb                                                      | TUBB4B       | 417255    | YES | YES | YES |
| 1688 | Tubulin beta 6 class V                                                         | TUBB6        | 421037    | YES | NO  | NO  |
| 1689 | Tubulin beta class I                                                           | TUBB         | 396254    | YES | YES | YES |
| 1690 | Tubulin folding cofactor C                                                     | TBCC         | 428567    | YES | YES | YES |
| 1691 | Tubulin folding cofactor D                                                     | TBCD         | 417334    | NO  | YES | NO  |
| 1692 | Tubulin tyrosine ligase like 12                                                | TTLL12       | 418227    | YES | YES | NO  |
| 1693 | Tubulin, alpha 3e                                                              | TUBA3E       | 421169    | YES | YES | YES |
| 1694 | Tubulin, alpha 8b                                                              | TUBA8B       | 396426    | YES | NO  | YES |
| 1695 | Tubulin, beta 2A class IIa                                                     | TUBB2A       | 768337    | YES | YES | NO  |
| 1696 | Tumor protein D52                                                              | TPD52        | 770339    | YES | YES | YES |
| 1697 | Tumor protein D52 like 2                                                       | TPD52L2      | 419257    | YES | YES | YES |
| 1698 | Tumor protein, translationally-controlled 1                                    | TPT1         | 396363    | YES | YES | YES |
| 1699 | Tumor suppressing subtransferable candidate 1                                  | TSSC1        | 421916    | YES | YES | NO  |
| 1700 | Tyrosine 3-monooxygenase/tryptophan 5-monooxygenase activation protein beta    | YWHAB        | 419190    | YES | YES | YES |
| 1701 | Tyrosine 3-monooxygenase/tryptophan 5-monooxygenase activation protein epsilon | YWHAE        | 417554    | YES | YES | YES |

|      |                                                                              |           |           |     |     |     |
|------|------------------------------------------------------------------------------|-----------|-----------|-----|-----|-----|
| 1702 | Tyrosine 3-monooxygenase/tryptophan 5-monooxygenase activation protein eta   | YWHAH     | 416955    | YES | YES | NO  |
| 1703 | Tyrosine 3-monooxygenase/tryptophan 5-monooxygenase activation protein gamma | YWHAG     | 427820    | YES | YES | YES |
| 1704 | Tyrosine 3-monooxygenase/tryptophan 5-monooxygenase activation protein theta | YWHAQ     | 421932    | YES | YES | YES |
| 1705 | Tyrosine 3-monooxygenase/tryptophan 5-monooxygenase activation protein zeta  | YWHAZ     | 425619    | YES | YES | YES |
| 1706 | Tyrosyl-tRNA synthetase                                                      | YARS      | 419666    | YES | YES | YES |
| 1707 | U2 small nuclear RNA auxiliary factor 2                                      | U2AF2     | 112531333 | YES | NO  | NO  |
| 1708 | Ubiquinol-cytochrome c reductase core protein I                              | UQCRC1    | 416013    | YES | YES | NO  |
| 1709 | Ubiquinol-cytochrome c reductase core protein II                             | UQCRC2    | 427009    | YES | YES | NO  |
| 1710 | Ubiquinol-cytochrome c reductase, Rieske iron-sulfur polypeptide 1           | UQCRFS1   | 415752    | YES | YES | NO  |
| 1711 | Ubiquitin conjugating enzyme E2 H                                            | UBE2H     | 416678    | NO  | NO  | YES |
| 1712 | Ubiquitin conjugating enzyme E2 I                                            | UBE2I     | 374123    | YES | YES | YES |
| 1713 | Ubiquitin conjugating enzyme E2 K                                            | UBE2K     | 428787    | YES | YES | NO  |
| 1714 | Ubiquitin conjugating enzyme E2 L3                                           | UBE2L3    | 416769    | NO  | YES | YES |
| 1715 | Ubiquitin conjugating enzyme E2 M                                            | UBE2M     | 107049465 | YES | YES | YES |
| 1716 | Ubiquitin conjugating enzyme E2 N                                            | UBE2N     | 417898    | YES | YES | YES |
| 1717 | Ubiquitin conjugating enzyme E2 O                                            | UBE2O     | 417359    | NO  | NO  | YES |
| 1718 | Ubiquitin conjugating enzyme E2 V1                                           | UBE2V1    | 100538349 | YES | YES | YES |
| 1719 | Ubiquitin conjugating enzyme E2 V2                                           | UBE2V2    | 421109    | YES | YES | YES |
| 1720 | Ubiquitin C-terminal hydrolase L1                                            | UCHL1     | 770302    | YES | YES | NO  |
| 1721 | Ubiquitin C-terminal hydrolase L3                                            | UCHL3     | 395626    | YES | YES | YES |
| 1722 | Ubiquitin C-terminal hydrolase L5                                            | UCHL5     | 424359    | YES | YES | YES |
| 1723 | Ubiquitin fusion degradation 1 like (yeast)                                  | UFD1L     | 374186    | NO  | NO  | YES |
| 1724 | Ubiquitin like modifier activating enzyme 2                                  | UBA2      | 415784    | YES | YES | NO  |
| 1725 | Ubiquitin like modifier activating enzyme 3                                  | UBA3      | 426073    | YES | YES | YES |
| 1726 | Ubiquitin specific peptidase 5                                               | USP5      | 418290    | YES | YES | YES |
| 1727 | Ubiquitin specific peptidase 7                                               | USP7      | 395126    | YES | YES | YES |
| 1728 | Ubiquitin specific peptidase 10                                              | USP10     | 415817    | YES | NO  | NO  |
| 1729 | Ubiquitin specific peptidase 14                                              | USP14     | 421063    | YES | YES | YES |
| 1730 | Ubiquitin specific peptidase 24                                              | USP24     | 424665    | NO  | NO  | YES |
| 1731 | Ubiquitin specific peptidase 47                                              | USP47     | 423032    | NO  | NO  | YES |
| 1732 | Ubiquitin specific peptidase 9, Y-linked                                     | USP9Y     | 418569    | YES | YES | YES |
| 1733 | Ubiquitin-like modifier activating enzyme 7                                  | UBA7      | 395178    | YES | YES | NO  |
| 1734 | UDP-galactose-4-epimerase                                                    | GALE      | 419686    | YES | YES | NO  |
| 1735 | UDP-glucose 6-dehydrogenase                                                  | UGDH      | 422792    | YES | YES | YES |
| 1736 | UDP-glucose glycoprotein glucosyltransferase 1                               | UGGT1     | 424757    | YES | YES | YES |
| 1737 | UDP-glucose pyrophosphorylase 2                                              | UGP2      | 373900    | YES | YES | NO  |
| 1738 | UDP-N-acetylglucosamine pyrophosphorylase 1 like 1                           | UAP1L1    | 417295    | YES | YES | NO  |
| 1739 | Ufm1-specific protease 2                                                     | UFSP2     | 422542    | YES | NO  | YES |
| 1740 | Uncharacterized LOC769729                                                    | LOC769729 | 769729    | NO  | YES | NO  |
| 1741 | Uncharacterized oxidoreductase-like                                          | LOC415661 | 415661    | YES | NO  | NO  |
| 1742 | UPF1, RNA helicase and ATPase                                                | UPF1      | 420119    | YES | NO  | YES |
| 1743 | Uracil phosphoribosyltransferase homolog                                     | UPRT      | 422327    | YES | YES | NO  |
| 1744 | Uridine monophosphate synthetase                                             | UMPS      | 424256    | YES | YES | YES |
| 1745 | Uroplakin 1B                                                                 | UPK1B     | 418345    | YES | YES | NO  |
| 1746 | Uroplakin 3A                                                                 | UPK3A     | 418242    | YES | NO  | NO  |
| 1747 | Uroplakin 3B-like                                                            | UPK3LB    | 417514    | YES | YES | NO  |
| 1748 | Uroporphyrinogen decarboxylase                                               | UROD      | 424590    | YES | NO  | YES |
| 1749 | Uroporphyrinogen III synthase                                                | UROS      | 426223    | NO  | YES | YES |

|      |                                                       |           |         |     |     |     |
|------|-------------------------------------------------------|-----------|---------|-----|-----|-----|
| 1750 | USO1 vesicle transport factor                         | USO1      | 422575  | YES | YES | NO  |
| 1751 | Vacuolar protein sorting 13 homolog A                 | VPS13A    | 427050  | NO  | YES | NO  |
| 1752 | Vacuolar protein sorting 13 homolog D                 | VPS13D    | 419481  | NO  | NO  | YES |
| 1753 | Vacuolar protein sorting 25 homolog                   | VPS25     | 420021  | YES | YES | NO  |
| 1754 | Vacuolar protein sorting 4 homolog B                  | VPS4B     | 420901  | YES | YES | NO  |
| 1755 | Valosin containing protein                            | VCP       | 427410  | YES | YES | YES |
| 1756 | VAMP associated protein A                             | VAPA      | 768928  | YES | YES | NO  |
| 1757 | VAMP associated protein B and C                       | VAPB      | 419317  | YES | YES | YES |
| 1758 | Versican                                              | VCAN      | 395565  | NO  | YES | NO  |
| 1759 | Vesicle amine transport 1                             | VAT1      | 420009  | YES | YES | NO  |
| 1760 | Vesicle associated membrane protein 7                 | VAMP7     | 422297  | YES | YES | NO  |
| 1761 | VHL binding protein 1                                 | VBP1      | 422355  | YES | YES | YES |
| 1762 | Villin like                                           | VILL      | 420415  | YES | YES | NO  |
| 1763 | Vimentin                                              | VIM       | 420519  | YES | YES | YES |
| 1764 | Vinculin                                              | VCL       | 396422  | YES | YES | YES |
| 1765 | Vitamin K epoxide reductase complex, subunit 1        | VKORC1    | 404205  | YES | NO  | NO  |
| 1766 | Vitellogenin membrane outer layer 1 homolog           | VMO1      | 418974  | YES | YES | NO  |
| 1767 | Vitellogenin 1                                        | VTG1      | 424547  | YES | NO  | NO  |
| 1768 | Vitellogenin 2                                        | VTG2      | 424533  | YES | NO  | YES |
| 1769 | Vitellogenin 3                                        | VTG3      | 424534  | YES | NO  | NO  |
| 1770 | Vitronectin                                           | VTN       | 395935  | YES | YES | YES |
| 1771 | Voltage dependent anion channel 1                     | VDAC1     | 416320  | YES | YES | NO  |
| 1772 | Voltage dependent anion channel 2                     | VDAC2     | 395498  | YES | YES | YES |
| 1773 | Voltage dependent anion channel 3                     | VDAC3     | 4269793 | YES | YES | YES |
| 1774 | von Willebrand factor                                 | VWF       | 419031  | YES | YES | NO  |
| 1775 | VPS26, retromer complex component A                   | VPS26A    | 423696  | YES | YES | YES |
| 1776 | VPS29, retromer complex component                     | VPS29     | 416867  | YES | YES | NO  |
| 1777 | VPS35, retromer complex component                     | VPS35     | 415750  | YES | YES | YES |
| 1778 | VRK serine/threonine kinase 1                         | VRK1      | 423443  | YES | NO  | YES |
| 1779 | V-type proton ATPase catalytic subunit A-like         | LOC776719 | 776719  | NO  | YES | NO  |
| 1780 | WAPL cohesin release factor                           | WAPL      | 423608  | NO  | NO  | YES |
| 1781 | WAS protein family member 2                           | WASF2     | 426359  | NO  | YES | NO  |
| 1782 | WD repeat domain 1                                    | WDR1      | 422842  | YES | YES | YES |
| 1783 | WD repeat domain 48                                   | WDR48     | 420427  | YES | NO  | NO  |
| 1784 | WD repeat domain 77                                   | WDR77     | 419865  | YES | NO  | YES |
| 1785 | WD repeat domain 82                                   | WDR82     | 415942  | YES | YES | NO  |
| 1786 | WW domain binding protein 4                           | WBP4      | 418829  | NO  | NO  | YES |
| 1787 | X-prolyl aminopeptidase (aminopeptidase P) 1, soluble | XPNPEP1   | 423886  | YES | YES | YES |
| 1788 | Y-box binding protein 1                               | YBX1      | 386575  | YES | YES | YES |
| 1789 | Zinc finger CCCH-type containing 18                   | ZC3H18    | 415838  | YES | NO  | YES |
| 1790 | Zinc finger protein 185-like                          | ZNF185L   | 422301  | YES | YES | NO  |
| 1791 | Zinc finger protein 207                               | ZNF207    | 417413  | NO  | NO  | YES |
| 1792 | Zinc finger protein 518B                              | ZNF518B   | 422841  | NO  | NO  | YES |
| 1793 | Zinc finger RANBP2-type containing 2                  | ZRANB2    | 424717  | NO  | YES | NO  |
| 1794 | Zona pellucida glycoprotein 1                         | ZP1       | 395418  | YES | YES | NO  |
| 1795 | Zona pellucida sperm-binding protein 3                | ZP3       | 378906  | YES | YES | NO  |
| 1796 | Zyxin                                                 | ZYX       | 418300  | YES | NO  | NO  |
