# Supplementary material for: Proteomic Analysis of Chicken Chorioallantoic Membrane (CAM) during Embryonic Development Provides Functional Insight
Source: Hindawi journal article supplement (doi:10.1155/2022/7813921), 2022-01-01
Supplement: f5 [file 7813921.f5.pdf]

# Protein families using uniprot

| Entry      | Cross-reference (GeneID) | Gene names              | Protein names                                                                                                                                                                                                             | Protein families                                | Organism                | Cross-reference (Pfam)                   |
|------------|--------------------------|-------------------------|---------------------------------------------------------------------------------------------------------------------------------------------------------------------------------------------------------------------------|-------------------------------------------------|-------------------------|------------------------------------------|
| R4GF89     | 408037;                  | SFN                     | 14_3_3 domain-containing protein                                                                                                                                                                                          | 14-3-3 family                                   | Gallus gallus (Chicken) | PF00244;                                 |
| Q5ZLQ6     | 419190;                  | YWHAB RCJMB04_5d11      | 14-3-3 protein beta/alpha                                                                                                                                                                                                 | 14-3-3 family                                   | Gallus gallus (Chicken) | PF00244;                                 |
| Q5ZMT0     | 417554;                  | YWHAE RCJMB04_1e8       | 14-3-3 protein epsilon (14-3-3E)                                                                                                                                                                                          | 14-3-3 family                                   | Gallus gallus (Chicken) | PF00244;                                 |
| Q5ZKJ2     | 416955;                  | YWHAH RCJMB04_10g10     | 14_3_3 domain-containing protein                                                                                                                                                                                          | 14-3-3 family                                   | Gallus gallus (Chicken) | PF00244;                                 |
| Q5F3W6     | 427820;                  | YWHAG RCJMB04_5e12      | 14-3-3 protein gamma                                                                                                                                                                                                      | 14-3-3 family                                   | Gallus gallus (Chicken) | PF00244;                                 |
| Q5ZMD1     | 421932;                  | YWHAQ RCJMB04_2i3       | 14-3-3 protein theta                                                                                                                                                                                                      | 14-3-3 family                                   | Gallus gallus (Chicken) | PF00244;                                 |
| Q5ZKC9     | 425619;                  | YWHAZ RCJMB04_11i21     | 14-3-3 protein zeta                                                                                                                                                                                                       | 14-3-3 family                                   | Gallus gallus (Chicken) | PF00244;                                 |
| O57389     | 395921;                  | CNP                     | 2',3'-cyclic-nucleotide 3'-phosphodiesterase (CNP) (CNPase) (EC 3.1.4.37)                                                                                                                                                 | 2H phosphoesterase superfamily, CNPase family   | Gallus gallus (Chicken) | PF05881;                                 |
| Q98UJ6     | 395374;                  |                         | Dihydrolipoamide acetyltransferase component of pyruvate dehydrogenase complex (EC 2.3.1.-)                                                                                                                               | 2-oxoacid dehydrogenase family                  | Gallus gallus (Chicken) | PF00198;PF00364;PF02817;                 |
| E1C6N5     | 419796;                  | DLAT                    | Acetyltransferase component of pyruvate dehydrogenase complex (EC 2.3.1.12)                                                                                                                                               | 2-oxoacid dehydrogenase family                  | Gallus gallus (Chicken) | PF00198;PF00364;PF02817;                 |
| F1NQH8     | 423357;                  | DLST                    | Dihydrolipoalysine-residue succinyltransferase component of 2-oxoglutarate dehydrogenase complex, mitochondrial (EC 2.3.1.61) (E2K)                                                                                       | 2-oxoacid dehydrogenase family                  | Gallus gallus (Chicken) | PF00198;PF00364;                         |
| Q5F326     | 423357;                  | RCJMB04_39i8            | Dihydrolipoalysine-residue succinyltransferase component of 2-oxoglutarate dehydrogenase complex, mitochondrial (EC 2.3.1.61) (E2K)                                                                                       | 2-oxoacid dehydrogenase family                  | Gallus gallus (Chicken) | PF00198;PF00364;                         |
| F1P156     | 418953;                  | CRYL1                   | Uncharacterized protein                                                                                                                                                                                                   | 3-hydroxyacyl-CoA dehydrogenase family          | Gallus gallus (Chicken) | PF00725;PF02737;                         |
| E1BZH9     | 420290;                  | HADH                    | Uncharacterized protein                                                                                                                                                                                                   | 3-hydroxyacyl-CoA dehydrogenase family          | Gallus gallus (Chicken) | PF00725;PF02737;                         |
| Q5F3M8     | 427190;                  | RCJMB04_12o19           | Succinyl-CoA:3-ketoacid-coenzyme A transferase (EC 2.8.3.5)                                                                                                                                                               | 3-oxoacid CoA-transferase family                | Gallus gallus (Chicken) | PF01144;                                 |
| A0A1D5PJ03 | 415895;                  | NT5DC2                  | Uncharacterized protein                                                                                                                                                                                                   | 5'(3')-deoxyribonucleotidase family             | Gallus gallus (Chicken) | PF05761;                                 |
| Q5ZIZ4     | 423871;                  | NT5C2 RCJMB04_22h21     | Cytosolic purine 5'-nucleotidase (EC 3.1.3.5) (Cytosolic 5'-nucleotidase II)                                                                                                                                              | 5'(3')-deoxyribonucleotidase family             | Gallus gallus (Chicken) | PF05761;                                 |
| Q5ZIZ0     | 419450;                  | PGD RCJMB04_22k15       | 6-phosphogluconate dehydrogenase, decarboxylating (EC 1.1.1.44)                                                                                                                                                           | 6-phosphogluconate dehydrogenase family         | Gallus gallus (Chicken) | PF00393;PF03446;                         |
| E1BQU4     | 419972;                  | NSF                     | Vesicle-fusing ATPase (EC 3.6.4.6)                                                                                                                                                                                        | AAA ATPase family                               | Gallus gallus (Chicken) | PF00004;PF17862;PF02933;PF02359;         |
| Q90732     | 395804;                  | PSMC1                   | 26S proteasome regulatory subunit 4 (P26s4) (26S proteasome AAA-ATPase subunit RPT2) (Proteasome 26S subunit ATPase 1)                                                                                                    | AAA ATPase family                               | Gallus gallus (Chicken) | PF00004;PF17862;PF16450;                 |
| Q5ZMB8     | 417716;                  | PSMC2 RCJMB04_2j13      | 26S proteasome AAA-ATPase subunit RPT1 (26S proteasome regulatory subunit 7) (Proteasome 26S subunit ATPase 2)                                                                                                            | AAA ATPase family                               | Gallus gallus (Chicken) | PF00004;PF17862;                         |
| Q5ZIT7     | 423182;                  | PSMC3 RCJMB04_23k2      | AAA domain-containing protein                                                                                                                                                                                             | AAA ATPase family                               | Gallus gallus (Chicken) | PF00004;PF17862;PF16450;                 |
| F1NU79     | 428274;                  | PSMC5                   | AAA domain-containing protein                                                                                                                                                                                             | AAA ATPase family                               | Gallus gallus (Chicken) | PF00004;PF17862;PF16450;                 |
| Q5ZKX2     | 423586;                  | RCJMB04_8n6             | AAA domain-containing protein                                                                                                                                                                                             | AAA ATPase family                               | Gallus gallus (Chicken) | PF00004;PF17862;PF16450;                 |
| Q5ZM9      | 420901;                  | VPS4B RCJMB04_1o9       | Vesicle-fusing ATPase (EC 3.6.4.6)                                                                                                                                                                                        | AAA ATPase family                               | Gallus gallus (Chicken) | PF00004;PF17862;PF04212;PF09336;         |
| Q5ZM9      | 427410;                  | VCP vcp RCJMB04_1c3     | Transitional endoplasmic reticulum ATPase (EC 3.6.4.6) (Valosin-containing protein)                                                                                                                                       | AAA ATPase family                               | Gallus gallus (Chicken) | PF00004;PF17862;PF02933;PF02359;PF09336; |
| E1BR15     | 419685;                  | LYPLA2                  | Abhydrolase_2 domain-containing protein                                                                                                                                                                                   | AB hydrolase superfamily, AB hydrolase 2 family | Gallus gallus (Chicken) | PF02230;                                 |
| P53760     | 396136;                  | LCAT                    | Phosphatidylcholine-sterol acyltransferase (EC 2.3.1.43) (Lecithin-cholesterol acyltransferase) (Phospholipid-cholesterol acyltransferase) (Fragment)                                                                     | AB hydrolase superfamily, Lipase family         | Gallus gallus (Chicken) | PF02450;                                 |
| Q90Z12     | 100857237;               | gcn5                    | Histone acetyltransferase (EC 2.3.1.48)                                                                                                                                                                                   | Acetyltransferase family, GCN5 subfamily        | Gallus gallus (Chicken) | PF00583;PF00439;PF06466;                 |
| E1COV1     | 423588;                  | GNPNAT1                 | Glucosamine 6-phosphate N-acetyltransferase (EC 2.3.1.4)                                                                                                                                                                  | Acetyltransferase family, GNA1 subfamily        | Gallus gallus (Chicken) | PF00583;                                 |
| Q5ZL43     | 421918;                  | ADI1 MTCBP1 RCJMB04_7o8 | 1,2-dihydroxy-3-keto-5-methylthiopentene dioxygenase (EC 1.13.11.54) (Acireductone dioxygenase (Fe(2+)-requiring)) (ARD) (Fe-ARD) (Membrane-type 1 matrix metalloproteinase cytoplasmic tail-binding protein 1) (MTCBP-1) | Acireductone dioxygenase (ARD) family           | Gallus gallus (Chicken) | PF03079;                                 |

|            |         |                          |                                                                                                                                                                                                                                                              |                                                                      |                         |                          |
|------------|---------|--------------------------|--------------------------------------------------------------------------------------------------------------------------------------------------------------------------------------------------------------------------------------------------------------|----------------------------------------------------------------------|-------------------------|--------------------------|
| Q90875     | 373916; | ACO1 IREB1               | Cytoplasmic aconitase hydratase (Aconitase) (EC 4.2.1.3) (Citrate hydro-lyase) (Iron-responsive element-binding protein 1) (IRE-BP 1)                                                                                                                        | Aconitase/IPM isomerase family                                       | Gallus gallus (Chicken) | PF00330;PF00694;         |
| Q8AY13     | 374009; | ACO2                     | Aconitase hydratase, mitochondrial (Aconitase) (EC 4.2.1.-)                                                                                                                                                                                                  | Aconitase/IPM isomerase family                                       | Gallus gallus (Chicken) | PF00330;PF00694;         |
| E1BR36     | 424975; | ACTL6A                   | Uncharacterized protein                                                                                                                                                                                                                                      | Actin family                                                         | Gallus gallus (Chicken) | PF00022;                 |
| P08023     | 423787; | ACTA2                    | Actin, aortic smooth muscle (Alpha-actin) [Cleaved into: Actin, aortic smooth muscle, intermediate form]                                                                                                                                                     | Actin family                                                         | Gallus gallus (Chicken) | PF00022;                 |
| F1P476     | 423787; | ACTA2                    | Actin, aortic smooth muscle                                                                                                                                                                                                                                  | Actin family                                                         | Gallus gallus (Chicken) | PF00022;                 |
| P68034     | 423298; | ACTC1 ACTC               | Actin, alpha cardiac muscle 1 (Alpha-cardiac actin) [Cleaved into: Actin, alpha cardiac muscle 1, intermediate form]                                                                                                                                         | Actin family                                                         | Gallus gallus (Chicken) | PF00022;                 |
| A0A1D5NV17 | 426652; | ACTBL2                   | Uncharacterized protein                                                                                                                                                                                                                                      | Actin family                                                         | Gallus gallus (Chicken) | PF00022;                 |
| P53478     | 415296; |                          | Actin, cytoplasmic type 5                                                                                                                                                                                                                                    | Actin family                                                         | Gallus gallus (Chicken) | PF00022;                 |
| Q5ZM58     | 423862; | ACTR1A RCJMB04_3a24      | Uncharacterized protein                                                                                                                                                                                                                                      | Actin family                                                         | Gallus gallus (Chicken) | PF00022;                 |
| P53488     | 396147; | ACTR2 ARP2               | Actin-related protein 2 (Actin-like protein 2) (Actin-like protein ACTL)                                                                                                                                                                                     | Actin family, ARP2 subfamily                                         | Gallus gallus (Chicken) | PF00022;                 |
| Q90WD0     | 374197; | ACTR3 ARP3               | Actin-related protein 3 (Actin-like protein 3)                                                                                                                                                                                                               | Actin family, ARP3 subfamily                                         | Gallus gallus (Chicken) | PF00022;                 |
| P21566     | 423320; | CFL2                     | Cofilin-2 (Cofilin, muscle isoform)                                                                                                                                                                                                                          | Actin-binding proteins ADF family                                    | Gallus gallus (Chicken) | PF00241;                 |
| P18359     | 396539; | DSTN DSN RCJMB04_5f14    | Destrin (Actin-depolymerizing factor) (ADF)                                                                                                                                                                                                                  | Actin-binding proteins ADF family                                    | Gallus gallus (Chicken) | PF00241;                 |
| Q5ZHL1     | 424958; | RCJMB04_37a17            | AAA domain-containing protein                                                                                                                                                                                                                                | Activator 1 small subunits family                                    | Gallus gallus (Chicken) | PF00004;PF08542;         |
| Q5ZJ68     | 415974; | RCJMB04_20f2             | Uncharacterized protein                                                                                                                                                                                                                                      | Acyl-CoA dehydrogenase family                                        | Gallus gallus (Chicken) | PF00441;PF02770;PF02771; |
| Q5ZL56     | 416969; | ACADS RCJMB04_7j20       | Uncharacterized protein                                                                                                                                                                                                                                      | Acyl-CoA dehydrogenase family                                        | Gallus gallus (Chicken) | PF00441;PF02770;PF02771; |
| Q5ZJ93     | 424005; | RCJMB04_19o8             | Long-chain specific acyl-CoA dehydrogenase, mitochondrial (EC 1.3.8.8)                                                                                                                                                                                       | Acyl-CoA dehydrogenase family                                        | Gallus gallus (Chicken) | PF00441;PF02770;PF02771; |
| Q5ZK70     | 423947; | RCJMB04_12m17            | Uncharacterized protein                                                                                                                                                                                                                                      | Acyl-CoA dehydrogenase family                                        | Gallus gallus (Chicken) | PF00441;PF02770;PF02771; |
| F1NDA9     | 415880; | AP1G1                    | AP-1 complex subunit gamma                                                                                                                                                                                                                                   | Adaptor complexes large subunit family                               | Gallus gallus (Chicken) | PF01602;PF02883;         |
| Q5ZJ83     | 415880; | RCJMB04_20c5             | AP-1 complex subunit gamma                                                                                                                                                                                                                                   | Adaptor complexes large subunit family                               | Gallus gallus (Chicken) | PF01602;PF02883;         |
| A0A1D5NV94 | 423102; | AP2A2                    | AP-2 complex subunit alpha                                                                                                                                                                                                                                   | Adaptor complexes large subunit family                               | Gallus gallus (Chicken) | PF01602;PF02296;PF02883; |
| Q5F3T4     | 423102; | RCJMB04_7j8              | AP-2 complex subunit alpha                                                                                                                                                                                                                                   | Adaptor complexes large subunit family                               | Gallus gallus (Chicken) | PF01602;PF02296;PF02883; |
| Q5ZMG7     | 420149; | AP1M1 RCJMB04_2b13       | AP-1 complex subunit mu-1                                                                                                                                                                                                                                    | Adaptor complexes medium subunit family                              | Gallus gallus (Chicken) | PF00928;PF01217;         |
| Q5ZMP6     | 770246; | AP2M1 RCJMB04_1h23       | AP-2 complex subunit mu (AP-2 mu chain) (Clathrin assembly protein complex 2 mu medium chain) (Clathrin coat assembly protein AP50) (Clathrin coat-associated protein AP50) (HA2 50 kDa subunit) (Mu2-adaptin) (Plasma membrane adaptor AP-2 50 kDa protein) | Adaptor complexes medium subunit family                              | Gallus gallus (Chicken) | PF00928;PF01217;         |
| Q5ZL57     | 770561; | ARCN1 COPD RCJMB04_7j3   | Coatomer subunit delta (Archain) (Delta-coat protein) (Delta-COP)                                                                                                                                                                                            | Adaptor complexes medium subunit family, Delta-COP subfamily         | Gallus gallus (Chicken) | PF00928;PF01217;         |
| A0A1D5PPA8 | 419146; | AHCY                     | AdoHcyase_NAD domain-containing protein                                                                                                                                                                                                                      | Adenosylhomocysteinase family                                        | Gallus gallus (Chicken) | PF05221;PF00670;         |
| Q5F3Q3     | 419803; | RCJMB04_10b17            | AdoHcyase_NAD domain-containing protein                                                                                                                                                                                                                      | Adenosylhomocysteinase family                                        | Gallus gallus (Chicken) | PF05221;PF00670;         |
| P05081     | 396002; | AK1                      | Adenylate kinase isoenzyme 1 (AK 1) (EC 2.7.4.3) (EC 2.7.4.6) (ATP-AMP transphosphorylase 1) (ATP-AMP phosphotransferase) (Adenylate monophosphate kinase) (Myokinase)                                                                                       | Adenylate kinase family, AK1 subfamily                               | Gallus gallus (Chicken) |                          |
| Q5ZKE7     | 429100; | CMPK CMPK1 RCJMB04_11f2  | UMP-CMP kinase (EC 2.7.4.14) (Deoxycytidylate kinase) (CK) (dCMP kinase) (Nucleoside-diphosphate kinase) (EC 2.7.4.6) (Uridine monophosphate/cytidine monophosphate kinase) (UMP/CMP kinase) (UMP/CMPK)                                                      | Adenylate kinase family, UMP-CMP kinase subfamily                    | Gallus gallus (Chicken) |                          |
| F1NJ73     | 428227; | AK2                      | Adenylate kinase 2, mitochondrial (AK 2) (EC 2.7.4.3) (ATP-AMP transphosphorylase 2) (ATP-AMP phosphotransferase) (Adenylate monophosphate kinase)                                                                                                           | Adenylate kinase family; Adenylate kinase family, AK2 subfamily      | Gallus gallus (Chicken) | PF05191;                 |
| F1NVD4     | 776127; | ADSSL1 ADSS1             | Adenylosuccinate synthetase isozyme 1 (AMPSase 1) (AdSS 1) (EC 6.3.4.4) (Adenylosuccinate synthetase, basic isozyme) (Adenylosuccinate synthetase, muscle isozyme) (M-type adenylosuccinate synthetase) (IMP-aspartate ligase 1)                             | Adenylosuccinate synthetase family                                   | Gallus gallus (Chicken) | PF00709;                 |
| Q5ZJL5     | 428579; | ADSS2 ADSS RCJMB04_17e23 | Adenylosuccinate synthetase isozyme 2 (AMPSase 2) (AdSS 2) (EC 6.3.4.4) (Adenylosuccinate synthetase, acidic isozyme) (Adenylosuccinate synthetase, liver isozyme) (L-type adenylosuccinate synthetase) (IMP-aspartate ligase 2)                             | Adenylosuccinate synthetase family                                   | Gallus gallus (Chicken) | PF00709;                 |
| E1C735     | 423628; | MAT1A                    | S-adenosylmethionine synthase (EC 2.5.1.6)                                                                                                                                                                                                                   | AdoMet synthase family                                               | Gallus gallus (Chicken) | PF02773;PF02772;PF00438; |
| A0A1D5PH07 | 396534; | PAICS                    | AIR carboxylase (EC 4.1.1.21) (EC 6.3.2.6) (Multifunctional protein ADE2) (Phosphoribosylaminoimidazole carboxylase) (Phosphoribosylaminoimidazole-succinocarboxamide synthase) (SAICAR synthetase)                                                          | AIR carboxylase family, Class II subfamily; SAICAR synthetase family | Gallus gallus (Chicken) | PF00731;PF01259;         |

|            |            |                               |                                                                                                                                                                                                                            |                                                                             |                         |                                  |
|------------|------------|-------------------------------|----------------------------------------------------------------------------------------------------------------------------------------------------------------------------------------------------------------------------|-----------------------------------------------------------------------------|-------------------------|----------------------------------|
| E1BW4      | 417757;    | AASS                          | Lysine ketoglutarate reductase (EC 1.5.1.8) (EC 1.5.1.9) (Saccharopine dehydrogenase)                                                                                                                                      | AlaDH/PNT family                                                            | Gallus gallus (Chicken) | PF01262;PF05222;PF16653;PF03435; |
| E1C6A1     | 427196;    | NNT                           | Proton-translocating NAD(P)(+) transhydrogenase (EC 7.1.1.1)                                                                                                                                                               | AlaDH/PNT family                                                            | Gallus gallus (Chicken) | PF01262;PF05222;PF02233;PF12769; |
| Q9DD46     | 395389;    | ALDH6 ALDH1A3                 | Aldehyde dehydrogenase                                                                                                                                                                                                     | Aldehyde dehydrogenase family                                               | Gallus gallus (Chicken) | PF00171;                         |
| Q5ZLE2     | 417615;    | RCJMB04_6j4                   | Aldehyde dehydrogenase                                                                                                                                                                                                     | Aldehyde dehydrogenase family                                               | Gallus gallus (Chicken) | PF00171;                         |
| A0A1D5P553 | 428813;    | ALDH3B2                       | Aldehyde dehydrogenase                                                                                                                                                                                                     | Aldehyde dehydrogenase family                                               | Gallus gallus (Chicken) | PF00171;                         |
| A0A1D5PX1  | 419467;    | ALDH4A1                       | Multifunctional fusion protein [Includes: L-glutamate gamma-semialdehyde dehydrogenase (EC 1.2.1.88) (L-glutamate gamma-semialdehyde dehydrogenase); Delta-1-pyrroline-5-carboxylate dehydrogenase (P5C dehydrogenase)]    | Aldehyde dehydrogenase family                                               | Gallus gallus (Chicken) | PF00171;                         |
| A0A1D5PFY7 | 420818;    | ALDH5A1                       | Succinate-semialdehyde dehydrogenase (EC 1.2.1.24)                                                                                                                                                                         | Aldehyde dehydrogenase family                                               | Gallus gallus (Chicken) | PF00171;                         |
| E1C4W4     | 426812;    | ALDH7A1                       | Aldehyde dehydrogenase (NAD(+)) (EC 1.2.1.3)                                                                                                                                                                               | Aldehyde dehydrogenase family                                               | Gallus gallus (Chicken) | PF00171;                         |
| Q5ZK84     | 424599;    | AKR1A1 RCJMB04_12g8           | Aldo-keto reductase family 1 member A1 (EC 1.1.1.2) (Alcohol dehydrogenase [NADP(+)] (Aldehyde reductase)                                                                                                                  | Aldo/keto reductase family                                                  | Gallus gallus (Chicken) | PF00248;                         |
| Q90W83     | 395338;    | akr AKR1B10                   | Aldo-keto reductase (EC 1.1.1.2)                                                                                                                                                                                           | Aldo/keto reductase family                                                  | Gallus gallus (Chicken) | PF00248;                         |
| E1BVD1     | 418170;    | LOC418170                     | Aldo_ket_red domain-containing protein                                                                                                                                                                                     | Aldo/keto reductase family                                                  | Gallus gallus (Chicken) | PF00248;                         |
| Q5ZL03     | 424492;    | BCAR3 RCJMB04_8g18            | GCS light chain (Gamma-ECS regulatory subunit) (Gamma-glutamylcysteine synthetase regulatory subunit) (Glutamate-cysteine ligase modifier subunit)                                                                         | Aldo/keto reductase family, Glutamate-cysteine ligase light chain subfamily | Gallus gallus (Chicken) |                                  |
| F1ND55     | 422882;    | ADD1                          | Aldolase_II domain-containing protein                                                                                                                                                                                      | Aldolase class II family, Adducin subfamily                                 | Gallus gallus (Chicken) | PF00596;                         |
| P05094     | 373918;    | ACTN1                         | Alpha-actinin-1 (Alpha-actinin cytoskeletal isoform) (F-actin cross-linking protein) (Non-muscle alpha-actinin-1)                                                                                                          | Alpha-actinin family                                                        | Gallus gallus (Chicken) | PF00307;PF08726;PF00435;         |
| A0A1D5P9P3 | 373918;    | ACTN1                         | Alpha-actinin-1                                                                                                                                                                                                            | Alpha-actinin family                                                        | Gallus gallus (Chicken) | PF00307;PF13833;PF08726;PF00435; |
| Q90734     | 396024;    | ACTN4                         | Alpha-actinin-4 (Non-muscle alpha-actinin 4)                                                                                                                                                                               | Alpha-actinin family                                                        | Gallus gallus (Chicken) | PF00307;PF08726;PF00435;         |
| P07630     | 396257;    | CA2                           | Carbonic anhydrase 2 (EC 4.2.1.1) (Carbonate dehydratase II) (Carbonic anhydrase II) (CA-II)                                                                                                                               | Alpha-carbonic anhydrase family                                             | Gallus gallus (Chicken) | PF00194;                         |
| A0A1D5NX31 | 100858989; | CA13                          | Carbonic anhydrase (EC 4.2.1.1)                                                                                                                                                                                            | Alpha-carbonic anhydrase family                                             | Gallus gallus (Chicken) | PF00194;                         |
| Q5ZJA7     | 426429;    | LOC107054982<br>RCJMB04_19j12 | Oxoglutarate dehydrogenase (succinyl-transferring) (EC 1.2.4.2)                                                                                                                                                            | Alpha-ketoglutarate dehydrogenase family                                    | Gallus gallus (Chicken) | PF16078;PF00676;PF16870;PF02779; |
| Q6XL41     | 415490;    | RHCG                          | Ammonium transporter Rh type C (Rhesus blood group family type C glycoprotein) (Rh family type C glycoprotein) (Rh type C glycoprotein)                                                                                    | Ammonium transporter (TC 2.A.49) family, Rh subfamily                       | Gallus gallus (Chicken) | PF00909;                         |
| F1NF66     | 395118;    | RHAG                          | Ammonium_transp domain-containing protein                                                                                                                                                                                  | Ammonium transporter (TC 2.A.49) family, Rh subfamily                       | Gallus gallus (Chicken) | PF00909;                         |
| Q7T066     | 395118;    | RHAG                          | Rh blood group-associated glycoprotein                                                                                                                                                                                     | Ammonium transporter (TC 2.A.49) family, Rh subfamily                       | Gallus gallus (Chicken) | PF00909;                         |
| P15575     | 396532;    | SLC4A1                        | Band 3 anion transport protein (Solute carrier family 4 member 1)                                                                                                                                                          | Anion exchanger (TC 2.A.31) family                                          | Gallus gallus (Chicken) | PF07565;PF00955;                 |
| F1N9S7     | 404271;    | ANXA1                         | Annexin                                                                                                                                                                                                                    | Annexin family                                                              | Gallus gallus (Chicken) | PF00191;                         |
| Q6QA29     | 404271;    |                               | Annexin                                                                                                                                                                                                                    | Annexin family                                                              | Gallus gallus (Chicken) | PF00191;                         |
| P17785     | 396297;    | ANXA2 ANX2                    | Annexin A2 (Annexin II) (Annexin-2) (Calpactin I heavy chain) (Calpactin-1 heavy chain) (Chromobindin-8) (Lipocortin II) (Placental anticoagulant protein IV) (PAP-IV) (Protein I) (p36)                                   | Annexin family                                                              | Gallus gallus (Chicken) | PF00191;                         |
| A0A1C9KD18 | 396297;    | ANXA2                         | Annexin                                                                                                                                                                                                                    | Annexin family                                                              | Gallus gallus (Chicken) | PF00191;                         |
| P17153     | 428767;    | ANXA5 ANX5                    | Annexin A5 (Anchorin CII) (Annexin V) (Annexin-5) (Calphobindin I) (CBP-I) (Endonexin II) (Lipocortin V) (Placental anticoagulant protein I) (PAP-I) (Thromboplastin inhibitor) (Vascular anticoagulant-alpha) (VAC-alpha) | Annexin family                                                              | Gallus gallus (Chicken) | PF00191;                         |
| P51901     | 395481;    | ANXA6 ANX6                    | Annexin A6 (67 kDa calelectrin) (Annexin VI) (Annexin-6) (Calphobindin-II) (CPB-II) (Chromobindin-20) (Lipocortin VI) (P68) (P70) (Protein III)                                                                            | Annexin family                                                              | Gallus gallus (Chicken) | PF00191;                         |
| E1C1D1     | 423747;    | ANXA7                         | Annexin                                                                                                                                                                                                                    | Annexin family                                                              | Gallus gallus (Chicken) | PF00191;                         |
| E1C8K3     | 423774;    | ANXA8L1                       | Annexin                                                                                                                                                                                                                    | Annexin family                                                              | Gallus gallus (Chicken) | PF00191;                         |
| A0A1D5PN32 | 423637;    | ANXA11                        | Annexin                                                                                                                                                                                                                    | Annexin family                                                              | Gallus gallus (Chicken) | PF00191;                         |
| Q5ZL66     | 423637;    | RCJMB04_6f1                   | Annexin                                                                                                                                                                                                                    | Annexin family                                                              | Gallus gallus (Chicken) | PF00191;                         |
| Q5ZMN0     | 420087;    | ANP32B RCJMB04_1j7            | Acidic leucine-rich nuclear phosphoprotein 32 family member B                                                                                                                                                              | ANP32 family                                                                | Gallus gallus (Chicken) |                                  |

|            |         |                            |                                                                                                                                                               |                                                     |                         |                                                  |
|------------|---------|----------------------------|---------------------------------------------------------------------------------------------------------------------------------------------------------------|-----------------------------------------------------|-------------------------|--------------------------------------------------|
| Q5F4A3     | 426109; | ANP32E RCJMB04_1i3         | Acidic leucine-rich nuclear phosphoprotein 32 family member E                                                                                                 | ANP32 family                                        | Gallus gallus (Chicken) |                                                  |
| Q5ZMW3     | 423168; | API5 RCJMB04_1a12          | Apoptosis inhibitor 5 (API-5)                                                                                                                                 | API5 family                                         | Gallus gallus (Chicken) | PF05918;                                         |
| P08250     | 396536; | APOA1                      | Apolipoprotein A-I (Apo-AI) (ApoA-I) (Apolipoprotein A1) [Cleaved into: Proapolipoprotein A-I (ProapoA-I)]                                                    | Apolipoprotein A1/A4/E family                       | Gallus gallus (Chicken) | PF01442;                                         |
| O93601     | 395780; | apoAIV                     | Apolipoprotein AIV                                                                                                                                            | Apolipoprotein A1/A4/E family                       | Gallus gallus (Chicken) | PF01442;                                         |
| A0A1D5NXD7 | 418599; | APOO                       | MICOS complex subunit                                                                                                                                         | Apolipoprotein O/MICOS complex subunit Mic27 family | Gallus gallus (Chicken) | PF09769;                                         |
| A0A1D5PXD8 | 428222; | AGO1                       | Uncharacterized protein                                                                                                                                       | Argonaute family                                    | Gallus gallus (Chicken) | PF08699;PF16488;PF16487;PF16486;PF02170;PF02171; |
| Q5ZLG4     | 419628; | AGO3 EIF2C3 RCJMB04_6f12   | Protein argonaute-3 (Argonaute3) (EC 3.1.26.n2) (Argonaute RISC catalytic component 3) (Eukaryotic translation initiation factor 2C 3) (eIF-2C 3)             | Argonaute family, Ago subfamily                     | Gallus gallus (Chicken) | PF08699;PF16488;PF16487;PF16486;PF02170;PF02171; |
| F1P1K3     | 429041; | ARPC2                      | Arp2/3 complex 34 kDa subunit                                                                                                                                 | ARPC2 family                                        | Gallus gallus (Chicken) | PF04045;                                         |
| E1C8Y3     | 416837; | ARPC3                      | Actin-related protein 2/3 complex subunit 3                                                                                                                   | ARPC3 family                                        | Gallus gallus (Chicken) | PF04062;                                         |
| F1P010     | 416051; | ARPC4                      | Actin-related protein 2/3 complex subunit 4                                                                                                                   | ARPC4 family                                        | Gallus gallus (Chicken) | PF05856;                                         |
| Q5ZMV5     | 429075; | ARPC5 RCJMB04_1b5          | Actin-related protein 2/3 complex subunit 5                                                                                                                   | ARPC5 family                                        | Gallus gallus (Chicken) | PF04699;                                         |
| P13914     | 415809; |                            | Arylamine N-acetyltransferase, pineal gland isozyme NAT-3 (Arylamine acetylase) (EC 2.3.1.5)                                                                  | Arylamine N-acetyltransferase family                | Gallus gallus (Chicken) | PF00797;                                         |
| P05122     | 396248; | CKB                        | Creatine kinase B-type (EC 2.7.3.2) (B-CK) (Creatine kinase B chain) (Creatine phosphokinase M-type) (CPK-B)                                                  | ATP:guanido phosphotransferase family               | Gallus gallus (Chicken) | PF00217;PF02807;                                 |
| E1BUZ7     | 416511; | ATPAF2                     | Uncharacterized protein                                                                                                                                       | ATP12 family                                        | Gallus gallus (Chicken) | PF07542;                                         |
| A0A1L1RZJ6 | 431564; | ATP5A1W                    | ATP synthase subunit alpha                                                                                                                                    | ATPase alpha/beta chains family                     | Gallus gallus (Chicken) | PF00006;PF00306;PF02874;                         |
| Q5ZLC5     | 426673; | ATP5F1B ATP5B RCJMB04_6i18 | ATP synthase subunit beta, mitochondrial (EC 7.1.2.2) (ATP synthase F1 subunit beta)                                                                          | ATPase alpha/beta chains family                     | Gallus gallus (Chicken) | PF00006;PF02874;                                 |
| Q90647     | 395821; | ATP6V1A                    | V-type proton ATPase catalytic subunit A (V-ATPase subunit A) (EC 7.1.2.2) (V-ATPase 69 kDa subunit) (Vacuolar proton pump subunit alpha)                     | ATPase alpha/beta chains family                     | Gallus gallus (Chicken) | PF00006;PF02874;PF16886;                         |
| F1NBW2     | 395821; | ATP6V1A                    | H(+)-transporting two-sector ATPase (EC 7.1.2.2)                                                                                                              | ATPase alpha/beta chains family                     | Gallus gallus (Chicken) | PF00006;PF02874;PF16886;                         |
| A0A1D5PP57 | 395497; | ATP6V1B2                   | Vacuolar proton pump subunit B (V-ATPase subunit B) (Vacuolar proton pump subunit B)                                                                          | ATPase alpha/beta chains family                     | Gallus gallus (Chicken) | PF00006;PF02874;                                 |
| Q9I8A2     | 395497; | VATB                       | Vacuolar proton pump subunit B (V-ATPase subunit B) (Vacuolar proton pump subunit B) (Fragment)                                                               | ATPase alpha/beta chains family                     | Gallus gallus (Chicken) | PF00006;PF02874;                                 |
| H9KYP2     | 776719; | LOC776719                  | H(+)-transporting two-sector ATPase (EC 7.1.2.2)                                                                                                              | ATPase alpha/beta chains family                     | Gallus gallus (Chicken) | PF00006;PF02874;PF16886;                         |
| E1C658     | 422115; | ATP5H                      | ATP synthase subunit d, mitochondrial                                                                                                                         | ATPase d subunit family                             | Gallus gallus (Chicken) | PF05873;                                         |
| A0A1D5P810 | 418508; | ATP5O                      | ATP synthase peripheral stalk subunit OSCP (ATP synthase subunit O, mitochondrial) (Oligomycin sensitivity conferral protein)                                 | ATPase delta chain family                           | Gallus gallus (Chicken) | PF00213;                                         |
| A0A1D5P0U8 | 419108; | ATP5C1                     | ATP synthase subunit gamma                                                                                                                                    | ATPase gamma chain family                           | Gallus gallus (Chicken) | PF00231;                                         |
| A0A1L1RYK0 | 419108; | ATP5C1                     | ATP synthase subunit gamma                                                                                                                                    | ATPase gamma chain family                           | Gallus gallus (Chicken) | PF00231;                                         |
| F1NLR1     | 416714; | ACSS1A                     | Acetyl-coenzyme A synthetase (EC 6.2.1.1)                                                                                                                     | ATP-dependent AMP-binding enzyme family             | Gallus gallus (Chicken) | PF16177;PF00501;PF13193;                         |
| A0A1D5PNV7 | 420957; | TMEM245                    | Uncharacterized protein                                                                                                                                       | Autoinducer-2 exporter (AI-2E) (TC 2.A.86) family   | Gallus gallus (Chicken) | PF01594;                                         |
| E1BSU4     | 420957; | TMEM245                    | Uncharacterized protein                                                                                                                                       | Autoinducer-2 exporter (AI-2E) (TC 2.A.86) family   | Gallus gallus (Chicken) | PF01594;                                         |
| Q5ZML0     | 421417; | BABAM2 BRE RCJMB04_1i17    | BRISC and BRCA1-A complex member 2 (BRCA1-A complex subunit BRE) (BRCA1/BRCA2-containing complex subunit 45) (Brain and reproductive organ-expressed protein) | BABAM2 family                                       | Gallus gallus (Chicken) | PF06113;                                         |
| F1NJ94     | 423670; | ERLIN1                     | PHB domain-containing protein                                                                                                                                 | Band 7/mec-2 family                                 | Gallus gallus (Chicken) | PF01145;                                         |
| F1NBD0     | 426769; | ERLIN2                     | PHB domain-containing protein                                                                                                                                 | Band 7/mec-2 family                                 | Gallus gallus (Chicken) | PF01145;                                         |
| E1BTV1     | 417118; | STOM                       | PHB domain-containing protein                                                                                                                                 | Band 7/mec-2 family                                 | Gallus gallus (Chicken) | PF01145;                                         |
| A0A1D5PCD1 | 417579; | FLOT2                      | Flotillin                                                                                                                                                     | Band 7/mec-2 family, Flotillin subfamily            | Gallus gallus (Chicken) | PF01145;PF15975;                                 |
| A0A1L1RV80 | 417579; | FLOT2                      | Flotillin                                                                                                                                                     | Band 7/mec-2 family, Flotillin subfamily            | Gallus gallus (Chicken) | PF01145;PF15975;                                 |

|            |            |                      |                                                                                                                                                                                       |                                                                              |                         |                          |
|------------|------------|----------------------|---------------------------------------------------------------------------------------------------------------------------------------------------------------------------------------|------------------------------------------------------------------------------|-------------------------|--------------------------|
| Q5ZHQ3     | 417579;    | FLOT2 RCJMB04_349    | Flotillin                                                                                                                                                                             | Band 7/mec-2 family, Flotillin subfamily                                     | Gallus gallus (Chicken) | PF01145;PF15975;         |
| P23614     | 373905;    | BASP1                | Brain acid soluble protein 1 homolog (23 kDa cortical cytoskeleton-associated protein) (CAP-23)                                                                                       | BASP1 family                                                                 | Gallus gallus (Chicken) | PF05466;                 |
| E1C310     | 417702;    | BCAP29               | Endoplasmic reticulum transmembrane protein                                                                                                                                           | BCAP29/BCAP31 family                                                         | Gallus gallus (Chicken) | PF05529;PF18035;         |
| Q07816     | 373954;    | BCL2L1 BCL-X BCLX    | Bcl-2-like protein 1 (Bcl2-L-1) (Apoptosis regulator Bcl-X)                                                                                                                           | Bcl-2 family                                                                 | Gallus gallus (Chicken) | PF00452;PF02180;         |
| F1NY54     | 419623;    | THRAP3               | Uncharacterized protein                                                                                                                                                               | BCLAF-1/THRAP3 family                                                        | Gallus gallus (Chicken) | PF15440;                 |
| A0A1D5NVE8 | 395964;    | CTNNB1               | Uncharacterized protein                                                                                                                                                               | Beta-catenin family                                                          | Gallus gallus (Chicken) | PF00514;                 |
| A0A1D5PQN0 | 395964;    | CTNNB1               | Uncharacterized protein                                                                                                                                                               | Beta-catenin family                                                          | Gallus gallus (Chicken) | PF00514;                 |
| O42486     | 395964;    | Bcat                 | Beta catenin                                                                                                                                                                          | Beta-catenin family                                                          | Gallus gallus (Chicken) | PF00514;                 |
| E1C1V3     | 429710;    | JUP                  | Junction plakoglobin                                                                                                                                                                  | Beta-catenin family                                                          | Gallus gallus (Chicken) | PF00514;                 |
| A0A1D5PGF0 | 423621;    | GHITM                | Uncharacterized protein                                                                                                                                                               | BI1 family                                                                   | Gallus gallus (Chicken) | PF01027;                 |
| E1BY06     | 421334;    | BROX                 | BRO1 domain- and CAAX motif-containing protein (BRO1 domain-containing protein BROX)                                                                                                  | BROX family                                                                  | Gallus gallus (Chicken) | PF03097;                 |
| E1BV47     | 416492;    | BUD31                | Protein BUD31 homolog                                                                                                                                                                 | BUD31 (G10) family                                                           | Gallus gallus (Chicken) | PF01125;                 |
| Q5ZLT7     | 424073;    | BZW1 RCJMB04_4o16    | Basic leucine zipper and W2 domain-containing protein 1                                                                                                                               | BZW family                                                                   | Gallus gallus (Chicken) | PF02020;                 |
| Q5ZL42     | 420594;    | BZW2 RCJMB04_7o12    | Basic leucine zipper and W2 domain-containing protein 2                                                                                                                               | BZW family                                                                   | Gallus gallus (Chicken) | PF02020;                 |
| F1NM03     | 420594;    | BZW2                 | Basic leucine zipper and W2 domain-containing protein 2                                                                                                                               | BZW family                                                                   | Gallus gallus (Chicken) | PF02020;                 |
| Q5ZM44     | 423211;    | CHP1 CHP RCJMB04_3d7 | Calcieneurin B homologous protein 1 (Calcieneurin B-like protein) (Calcium-binding protein CHP) (Calcium-binding protein p22) (EF-hand calcium-binding domain-containing protein p22) | Calcieneurin regulatory subunit family, CHP subfamily                        | Gallus gallus (Chicken) | PF13499;                 |
| E1BST5     | 768444;    | CACNA2D1             | VWFA domain-containing protein                                                                                                                                                        | Calcium channel subunit alpha-2/delta family                                 | Gallus gallus (Chicken) | PF08473;PF00092;PF08399; |
| P12957     | 373965;    | CALD1 CAD            | Caldesmon (CDM)                                                                                                                                                                       | Caldesmon family                                                             | Gallus gallus (Chicken) | PF02029;                 |
| P05419     | 396523;    |                      | Neo-calmodulin (NeoCaM) (Fragment)                                                                                                                                                    | Calmodulin family                                                            | Gallus gallus (Chicken) | PF13499;                 |
| P26932     | 396522;    | CNN1                 | Calponin-1 (Calponin, smooth muscle)                                                                                                                                                  | Calponin family                                                              | Gallus gallus (Chicken) | PF00402;PF00307;         |
| Q5ZKU6     | 100216000; | CNN2 RCJMB04_9b22    | Calponin                                                                                                                                                                              | Calponin family                                                              | Gallus gallus (Chicken) | PF00402;PF00307;         |
| P19966     | 396490;    | TAGLN SM22           | Transgelin (Smooth muscle protein 22-alpha) (SM22-alpha)                                                                                                                              | Calponin family                                                              | Gallus gallus (Chicken) | PF00402;PF00307;         |
| A0A1D5PF08 | 416288;    | CANX                 | Uncharacterized protein                                                                                                                                                               | Calreticulin family                                                          | Gallus gallus (Chicken) | PF00262;                 |
| Q5ZMF5     | 416288;    | RCJMB04_2d15         | Uncharacterized protein                                                                                                                                                               | Calreticulin family                                                          | Gallus gallus (Chicken) | PF00262;                 |
| Q6DRR5     | 419557;    | FABP                 | Fatty acid-binding protein                                                                                                                                                            | Calycin superfamily, Fatty-acid binding protein (FABP) family                | Gallus gallus (Chicken) | PF00061;                 |
| Q5ZIR7     | 420197;    | RCJMB04_23p16        | FABP domain-containing protein                                                                                                                                                        | Calycin superfamily, Fatty-acid binding protein (FABP) family                | Gallus gallus (Chicken) | PF00061;                 |
| Q05423     | 396246;    | FABP7                | Fatty acid-binding protein, brain (Brain-type fatty acid-binding protein) (B-FABP) (Fatty acid-binding protein 7) (Fatty acid-binding protein, retina) (R-FABP)                       | Calycin superfamily, Fatty-acid binding protein (FABP) family                | Gallus gallus (Chicken) | PF00061;                 |
| Q5G8Y9     | 424893;    | ApoD APOD            | Apolipoprotein D                                                                                                                                                                      | Calycin superfamily, Lipocalin family                                        | Gallus gallus (Chicken) | PF08212;                 |
| P21760     | 396393;    | EXFABP               | Extracellular fatty acid-binding protein (Ex-FABP) (Protein Ch21) (Quiescence-specific protein) (p20K)                                                                                | Calycin superfamily, Lipocalin family                                        | Gallus gallus (Chicken) | PF00061;                 |
| Q8QFM7     | 374110;    | L-PGDS               | Chondrogenesis associated lipocalin (Lipocalin-type prostaglandin D synthase)                                                                                                         | Calycin superfamily, Lipocalin family                                        | Gallus gallus (Chicken) | PF00061;                 |
| P41263     | 396166;    | RBP4                 | Retinol-binding protein 4 (Plasma retinol-binding protein) (PRBP) (RBP)                                                                                                               | Calycin superfamily, Lipocalin family                                        | Gallus gallus (Chicken) | PF00061;                 |
| Q8JIG5     | 395220;    | ogchi OGCHI ORM1     | Alpha-1-acid glycoprotein                                                                                                                                                             | Calycin superfamily, Lipocalin family; Calycin superfamily, Lipocalin family | Gallus gallus (Chicken) | PF11032;                 |
| Q5ZM91     | 417438;    | PRKAR1A RCJMB04_2n5  | cAMP-dependent protein kinase type I-alpha regulatory subunit                                                                                                                         | CAMP-dependent kinase regulatory chain family                                | Gallus gallus (Chicken) | PF00027;PF02197;         |
| F1NHL2     | 417837;    | CAND1                | TIP120 domain-containing protein                                                                                                                                                      | CAND family                                                                  | Gallus gallus (Chicken) | PF08623;                 |

|            |            |                         |                                                                                                                                                                                                                                                                 |                                                                                                                |                         |                                  |
|------------|------------|-------------------------|-----------------------------------------------------------------------------------------------------------------------------------------------------------------------------------------------------------------------------------------------------------------|----------------------------------------------------------------------------------------------------------------|-------------------------|----------------------------------|
| Q5XNV3     | 426151;    | CAPRIN1                 | Cytoplasmic activation-proliferation-associated protein 1                                                                                                                                                                                                       | Caprin family                                                                                                  | Gallus gallus (Chicken) | PF12287;PF18293;                 |
| A0A1D5NZY6 | 423735;    | ADK                     | Adenosine kinase (EC 2.7.1.20)                                                                                                                                                                                                                                  | Carbohydrate kinase PfkB family; Carbohydrate kinase pfkB family                                               | Gallus gallus (Chicken) | PF00294;                         |
| Q5ZMK9     | 423735;    | ADK RCJMB04_121         | Adenosine kinase (EC 2.7.1.20)                                                                                                                                                                                                                                  | Carbohydrate kinase PfkB family; Carbohydrate kinase pfkB family                                               | Gallus gallus (Chicken) | PF00294;                         |
| Q6B842     | 423118;    | CPT1A                   | Carnitine O-palmitoyltransferase (EC 2.3.1.21)                                                                                                                                                                                                                  | Carnitine/choline acetyltransferase family                                                                     | Gallus gallus (Chicken) | PF00755;PF16484;                 |
| F1P1U3     | 424649;    | CPT2                    | Carn_acyltransf domain-containing protein                                                                                                                                                                                                                       | Carnitine/choline acetyltransferase family                                                                     | Gallus gallus (Chicken) | PF00755;                         |
| Q5ZK83     | 424649;    | RCJMB04_12h19           | Carn_acyltransf domain-containing protein                                                                                                                                                                                                                       | Carnitine/choline acetyltransferase family                                                                     | Gallus gallus (Chicken) | PF00755;                         |
| Q5ZMM4     | 423600;    | RCJMB04_1j22            | Catalase (EC 1.11.1.6)                                                                                                                                                                                                                                          | Catalase family                                                                                                | Gallus gallus (Chicken) | PF00199;PF06628;                 |
| Q2IAL7     | 420407;    | CATHL2 CMAP27           | Cathelicidin-2 (CATH-2) (Fowlicidin-2) (Myeloid antimicrobial peptide 27)                                                                                                                                                                                       | Cathelicidin family                                                                                            | Gallus gallus (Chicken) |                                  |
| C4PFJ8     | 420407;    | CATHL2                  | Fowlicidin-2                                                                                                                                                                                                                                                    | Cathelicidin family                                                                                            | Gallus gallus (Chicken) |                                  |
| Q6QLQ5     | 414337;    | CATHL1 CATH             | Cathelicidin-1 (CATH-1) (Fowlicidin-1)                                                                                                                                                                                                                          | Cathelicidin family                                                                                            | Gallus gallus (Chicken) |                                  |
| C4PFJ7     | 414337;    | CATHL1 CathL1           | Fowlicidin-1                                                                                                                                                                                                                                                    | Cathelicidin family                                                                                            | Gallus gallus (Chicken) |                                  |
| Q03669     | 396446;    | ATP2A2                  | Sarcoplasmic/endoplasmic reticulum calcium ATPase 2 (SERCA2) (SR Ca(2+)-ATPase 2) (EC 7.2.2.10) (Calcium pump 2) (Calcium-transporting ATPase sarcoplasmic reticulum type, slow twitch skeletal muscle isoform) (Endoplasmic reticulum class 1/2 Ca(2+) ATPase) | Cation transport ATPase (P-type) (TC 3.A.3) family, Type IIA subfamily                                         | Gallus gallus (Chicken) | PF00689;PF00690;                 |
| A0A1L1RKB7 | 396446;    | ATP2A2                  | Calcium-transporting ATPase (EC 7.2.2.10)                                                                                                                                                                                                                       | Cation transport ATPase (P-type) (TC 3.A.3) family, Type IIA subfamily                                         | Gallus gallus (Chicken) | PF00689;PF00690;                 |
| A0A1D5PJX0 | 419934;    | ATP2B4                  | Calcium-transporting ATPase (EC 7.2.2.10)                                                                                                                                                                                                                       | Cation transport ATPase (P-type) (TC 3.A.3) family, Type IIB subfamily                                         | Gallus gallus (Chicken) | PF12424;PF00689;PF00690;         |
| A0A1D5PU07 | 419934;    | ATP2B4                  | Calcium-transporting ATPase (EC 7.2.2.10)                                                                                                                                                                                                                       | Cation transport ATPase (P-type) (TC 3.A.3) family, Type IIB subfamily                                         | Gallus gallus (Chicken) | PF12424;PF00689;PF00690;         |
| P09572     | 396530;    | ATP1A1                  | Sodium/potassium-transporting ATPase subunit alpha-1 (Na <sup>+</sup> /K <sup>+</sup> ) ATPase alpha-1 subunit) (EC 7.2.2.13) (Sodium pump subunit alpha-1)                                                                                                     | Cation transport ATPase (P-type) (TC 3.A.3) family, Type IIC subfamily                                         | Gallus gallus (Chicken) | PF00689;PF00690;                 |
| P35431     | 373996;    | CAV1                    | Caveolin-1                                                                                                                                                                                                                                                      | Caveolin family                                                                                                | Gallus gallus (Chicken) | PF01146;                         |
| Q90885     | 396006;    |                         | Leucine zipper protein                                                                                                                                                                                                                                          | CAVIN family                                                                                                   | Gallus gallus (Chicken) | PF15237;                         |
| E1BRQ5     | 422005;    | CCDC25                  | Coiled-coil domain-containing protein 25                                                                                                                                                                                                                        | CCDC25 family                                                                                                  | Gallus gallus (Chicken) | PF05670;                         |
| Q5ZKI4     | 424277;    | CCDC93 RCJMB04_10i21    | Coiled-coil domain-containing protein 93                                                                                                                                                                                                                        | CCDC93 family                                                                                                  | Gallus gallus (Chicken) | PF09762;                         |
| Q57476     | 395430;    | CDC37                   | Hsp90 co-chaperone Cdc37 (Hsp90 chaperone protein kinase-targeting subunit) (p50Cdc37)                                                                                                                                                                          | CDC37 family                                                                                                   | Gallus gallus (Chicken) | PF08564;PF08565;PF03234;         |
| Q5ZL72     | 424059;    | HSPD1 HSP60 RCJMB04_7g5 | 60 kDa heat shock protein, mitochondrial (EC 5.6.1.7) (60 kDa chaperonin) (Chaperonin 60) (CPN60) (Heat shock protein 60) (HSP-60) (Hsp60)                                                                                                                      | Chaperonin (HSP60) family                                                                                      | Gallus gallus (Chicken) | PF00118;                         |
| Q5ZKI1     | 422178;    | CLIC2 RCJMB04_10k5      | Chloride intracellular channel protein                                                                                                                                                                                                                          | Chloride channel CLIC family                                                                                   | Gallus gallus (Chicken) | PF13409;                         |
| A0A1D5PD90 | 417293;    | CLIC3                   | GST N-terminal domain-containing protein                                                                                                                                                                                                                        | Chloride channel CLIC family                                                                                   | Gallus gallus (Chicken) | PF13417;                         |
| F1NYZ7     | 419595;    | CLIC4                   | GST N-terminal domain-containing protein                                                                                                                                                                                                                        | Chloride channel CLIC family                                                                                   | Gallus gallus (Chicken) | PF13417;                         |
| P07341     | 427308;    | ALDOB                   | Fructose-bisphosphate aldolase B (EC 4.1.2.13) (Liver-type aldolase)                                                                                                                                                                                            | Class I fructose-bisphosphate aldolase family                                                                  | Gallus gallus (Chicken) | PF00274;                         |
| R4GM10     | 395492;    | ALDOC                   | Fructose-bisphosphate aldolase (EC 4.1.2.13)                                                                                                                                                                                                                    | Class I fructose-bisphosphate aldolase family                                                                  | Gallus gallus (Chicken) | PF00274;                         |
| Q5ZJZ9     | 101750306; | RCJMB04_14b8            | Protein arginine N-methyltransferase 5 (EC 2.1.1.-)                                                                                                                                                                                                             | Class I-like SAM-binding methyltransferase superfamily                                                         | Gallus gallus (Chicken) | PF05185;PF17286;PF17285;         |
| E1BYM1     | 421046;    | RNMT                    | mRNA cap guanine-N7 methyltransferase (EC 2.1.1.56)                                                                                                                                                                                                             | Class I-like SAM-binding methyltransferase superfamily, mRNA cap 0 methyltransferase family, De/DNA virus mRNA | Gallus gallus (Chicken) | PF03291;                         |
| F1NGW2     | 420830;    | TPMT                    | Thiopurine S-methyltransferase (EC 2.1.1.67)                                                                                                                                                                                                                    | Class I-like SAM-binding methyltransferase superfamily, TPMT family                                            | Gallus gallus (Chicken) | PF05724;                         |
| F1N832     | 418292;    | EMG1                    | Uncharacterized protein                                                                                                                                                                                                                                         | Class IV-like SAM-binding methyltransferase superfamily, RNA methyltransferase NEP1 family                     | Gallus gallus (Chicken) | PF03587;                         |
| Q5ZM11     | 416168;    | RARS1 RARS RCJMB04_3h11 | Arginine-tRNA ligase, cytoplasmic (EC 6.1.1.19) (Arginyl-tRNA synthetase) (ArgRS)                                                                                                                                                                               | Class-I aminoacyl-tRNA synthetase family                                                                       | Gallus gallus (Chicken) | PF03485;PF05746;PF00750;         |
| Q5F408     | 423086;    | CARS1 CARS RCJMB04_3o5  | Cysteine-tRNA ligase, cytoplasmic (EC 6.1.1.16) (Cysteinyl-tRNA synthetase) (CysRS)                                                                                                                                                                             | Class-I aminoacyl-tRNA synthetase family                                                                       | Gallus gallus (Chicken) | PF01406;                         |
| Q5F3C0     | 416057;    | RCJMB04_22h1            | Glutaminyl-tRNA synthetase (EC 6.1.1.18)                                                                                                                                                                                                                        | Class-I aminoacyl-tRNA synthetase family                                                                       | Gallus gallus (Chicken) | PF00749;PF03950;PF04558;PF04557; |

|            |            |                            |                                                                                                                                                                                                                                                                                           |                                                                                                                       |                         |                                  |
|------------|------------|----------------------------|-------------------------------------------------------------------------------------------------------------------------------------------------------------------------------------------------------------------------------------------------------------------------------------------|-----------------------------------------------------------------------------------------------------------------------|-------------------------|----------------------------------|
| A0A1D5P2D5 | 415957;    | IARS                       | Isoleucyl-tRNA synthetase (EC 6.1.1.5)                                                                                                                                                                                                                                                    | Class-I aminoacyl-tRNA synthetase family                                                                              | Gallus gallus (Chicken) | PF08264;PF00133;                 |
| A0A3Q2UG33 | 415957;    | IARS                       | Isoleucyl-tRNA synthetase (EC 6.1.1.5)                                                                                                                                                                                                                                                    | Class-I aminoacyl-tRNA synthetase family                                                                              | Gallus gallus (Chicken) | PF08264;PF00133;                 |
| Q5ZKA2     | 421346;    | IARS2 RCJMB04_12b19        | Isoleucine-tRNA ligase, mitochondrial (EC 6.1.1.5) (Isoleucyl-tRNA synthetase) (IleRS)                                                                                                                                                                                                    | Class-I aminoacyl-tRNA synthetase family                                                                              | Gallus gallus (Chicken) | PF08264;PF00133;                 |
| E1C2I9     | 416347;    | LARS                       | Leucyl-tRNA synthetase (EC 6.1.1.4)                                                                                                                                                                                                                                                       | Class-I aminoacyl-tRNA synthetase family                                                                              | Gallus gallus (Chicken) | PF08264;PF00133;                 |
| E1C2Z5     | 423458;    | WARS                       | T1-TrpRS (EC 6.1.1.2) (T2-TrpRS) (Tryptophan-tRNA ligase, cytoplasmic) (Tryptophanyl-tRNA synthetase)                                                                                                                                                                                     | Class-I aminoacyl-tRNA synthetase family                                                                              | Gallus gallus (Chicken) | PF00579;PF00458;                 |
| Q5ZJ08     | 419666;    | YARS1 YARS RCJMB04_21p3    | Tyrosine-tRNA ligase, cytoplasmic (EC 6.1.1.1) (Tyrosyl-tRNA synthetase) (TyrRS)                                                                                                                                                                                                          | Class-I aminoacyl-tRNA synthetase family                                                                              | Gallus gallus (Chicken) | PF00579;PF01588;                 |
| Q5ZM32     | 417699;    | DLD RCJMB04_3f8            | Dihydropolyl dehydrogenase (EC 1.8.1.4)                                                                                                                                                                                                                                                   | Class-I pyridine nucleotide-disulfide oxidoreductase family                                                           | Gallus gallus (Chicken) | PF07992;PF02852;                 |
| A0A1D5P338 | 771783;    | GSR                        | Glutathione reductase (EC 1.8.1.7)                                                                                                                                                                                                                                                        | Class-I pyridine nucleotide-disulfide oxidoreductase family                                                           | Gallus gallus (Chicken) | PF07992;PF02852;                 |
| P00504     | 396261;    | GOT1                       | Aspartate aminotransferase, cytoplasmic (cAspAT) (EC 2.6.1.1) (EC 2.6.1.3) (Cysteine aminotransferase, cytoplasmic) (Cysteine transaminase, cytoplasmic) (cCAT) (Glutamate oxaloacetate transaminase 1) (Transaminase A)                                                                  | Class-I pyridoxal-phosphate-dependent aminotransferase family                                                         | Gallus gallus (Chicken) | PF00155;                         |
| P00508     | 396533;    | GOT2                       | Aspartate aminotransferase, mitochondrial (mAspAT) (EC 2.6.1.1) (EC 2.6.1.7) (Glutamate oxaloacetate transaminase 2) (Kynurenine aminotransferase 4) (Kynurenine aminotransferase IV) (Kynurenine-oxoglutarate transaminase 4) (Kynurenine-oxoglutarate transaminase IV) (Transaminase A) | Class-I pyridoxal-phosphate-dependent aminotransferase family                                                         | Gallus gallus (Chicken) | PF00155;                         |
| Q5ZK08     | 426856;    | RCJMB04_13p14              | Asparagine-tRNA ligase (EC 6.1.1.22)                                                                                                                                                                                                                                                      | Class-II aminoacyl-tRNA synthetase family                                                                             | Gallus gallus (Chicken) | PF00152;PF01336;                 |
| Q5ZHR4     | 428403;    | GARS RCJMB04_34b10         | Diadenosine tetraphosphate synthetase (EC 6.1.1.14) (Glycine-tRNA ligase)                                                                                                                                                                                                                 | Class-II aminoacyl-tRNA synthetase family                                                                             | Gallus gallus (Chicken) | PF03129;PF00587;PF00458;         |
| Q5ZK86     | 416132;    | RCJMB04_12f15              | Histidine-tRNA ligase (EC 6.1.1.21)                                                                                                                                                                                                                                                       | Class-II aminoacyl-tRNA synthetase family                                                                             | Gallus gallus (Chicken) | PF03129;PF13393;PF00458;         |
| Q5ZKP8     | 415885;    | RCJMB04_9m1                | Lysine-tRNA ligase (EC 6.1.1.6) (Lysyl-tRNA synthetase)                                                                                                                                                                                                                                   | Class-II aminoacyl-tRNA synthetase family                                                                             | Gallus gallus (Chicken) | PF00152;PF01336;                 |
| Q5ZLW1     | 427427;    | RCJMB04_4k14               | Threonyl-tRNA synthetase (EC 6.1.1.3)                                                                                                                                                                                                                                                     | Class-II aminoacyl-tRNA synthetase family                                                                             | Gallus gallus (Chicken) | PF03129;PF02824;PF00587;PF07973; |
| Q5ZJQ2     | 100859604; | FARSA FARSLA RCJMB04_16g22 | Phenylalanine-tRNA ligase alpha subunit (EC 6.1.1.20) (Phenylalanyl-tRNA synthetase alpha subunit) (PheRS)                                                                                                                                                                                | Class-II aminoacyl-tRNA synthetase family, Phe-tRNA synthetase alpha subunit type 2 subfamily                         | Gallus gallus (Chicken) | PF18552;PF18554;PF18553;PF01409; |
| Q5ZJQ5     | 424296;    | RCJMB04_16g5               | Aspartate-tRNA ligase, cytoplasmic (EC 6.1.1.12) (Aspartyl-tRNA synthetase)                                                                                                                                                                                                               | Class-II aminoacyl-tRNA synthetase family, Type 2 subfamily                                                           | Gallus gallus (Chicken) | PF00152;PF01336;                 |
| Q5ZM75     | 426697;    | RCJMB04_2o24               | Seryl-tRNA synthetase (EC 6.1.1.11)                                                                                                                                                                                                                                                       | Class-II aminoacyl-tRNA synthetase family, Type-1 seryl-tRNA synthetase subfamily                                     | Gallus gallus (Chicken) | PF02403;PF00587;                 |
| F1P5J5     | 415668;    | AARS                       | Alanine-tRNA ligase (EC 6.1.1.7)                                                                                                                                                                                                                                                          | Class-II aminoacyl-tRNA synthetase family, Class-II aminoacyl-tRNA synthetase family, AlaX1 subfamily                 | Gallus gallus (Chicken) | PF02272;PF01411;PF07973;         |
| Q5ZKF3     | 415668;    | AARS RCJMB04_11d4          | Alanine-tRNA ligase (EC 6.1.1.7)                                                                                                                                                                                                                                                          | Class-II aminoacyl-tRNA synthetase family, Class-II aminoacyl-tRNA synthetase family, AlaX1 subfamily                 | Gallus gallus (Chicken) | PF01411;PF07973;                 |
| Q5ZLD1     | 420969;    | FH RCJMB04_6k20            | Fumarate hydratase, mitochondrial (EC 4.2.1.2)                                                                                                                                                                                                                                            | Class-II pyridoxal-phosphate-dependent family, Fumarase subfamily                                                     | Gallus gallus (Chicken) | PF10415;PF00206;                 |
| F1NBE3     | 101750333; | GCAT                       | Aminotran_1_2 domain-containing protein                                                                                                                                                                                                                                                   | Class-II pyridoxal-phosphate-dependent aminotransferase family                                                        | Gallus gallus (Chicken) | PF00155;                         |
| E1C8M8     | 416642;    | ABAT                       | (S)-3-amino-2-methylpropionate transaminase (EC 2.6.1.19) (EC 2.6.1.22) (4-aminobutyrate aminotransferase, mitochondrial) (GABA aminotransferase) (Gamma-amino-N-butyrate transaminase) (L-ABAT)                                                                                          | Class-III pyridoxal-phosphate-dependent aminotransferase family                                                       | Gallus gallus (Chicken) | PF00202;                         |
| Q5ZJ29     | 426430;    | OAT RCJMB04_21f9           | Ornithine-oxo-acid aminotransferase (EC 2.6.1.13)                                                                                                                                                                                                                                         | Class-III pyridoxal-phosphate-dependent aminotransferase family                                                       | Gallus gallus (Chicken) | PF00202;                         |
| Q5ZKP5     | 419133;    | RCJMB04_9m12               | Cysteine desulfurase, mitochondrial (EC 2.8.1.7)                                                                                                                                                                                                                                          | Class-V pyridoxal-phosphate-dependent aminotransferase family; Class-V pyridoxal-phosphate-dependent aminotransferase | Gallus gallus (Chicken) | PF00266;                         |
| F1NW23     | 395272;    | CLTC                       | Clathrin heavy chain                                                                                                                                                                                                                                                                      | Clathrin heavy chain family                                                                                           | Gallus gallus (Chicken) | PF00637;PF09268;PF01394;         |
| Q8UUR1     | 395272;    | CHC                        | Clathrin heavy-chain (Fragment)                                                                                                                                                                                                                                                           | Clathrin heavy chain family                                                                                           | Gallus gallus (Chicken) | PF00637;PF09268;PF01394;         |
| A0A1D5P650 | 416765;    | CLTCL1                     | Clathrin heavy chain                                                                                                                                                                                                                                                                      | Clathrin heavy chain family                                                                                           | Gallus gallus (Chicken) | PF00637;PF09268;PF01394;         |
| A0A1D5PAU8 | 416765;    | CLTCL1                     | Clathrin heavy chain                                                                                                                                                                                                                                                                      | Clathrin heavy chain family                                                                                           | Gallus gallus (Chicken) | PF00637;PF09268;PF01394;         |
| A0A1D5PDC1 | 416765;    | CLTCL1                     | Clathrin heavy chain                                                                                                                                                                                                                                                                      | Clathrin heavy chain family                                                                                           | Gallus gallus (Chicken) | PF00637;PF09268;PF01394;         |
| A0A1D5PW75 | 416765;    | CLTCL1                     | Clathrin heavy chain                                                                                                                                                                                                                                                                      | Clathrin heavy chain family                                                                                           | Gallus gallus (Chicken) | PF00637;PF09268;PF01394;         |
| A0A3Q2TVE4 | 427284;    | CLTA                       | Clathrin light chain                                                                                                                                                                                                                                                                      | Clathrin light chain family                                                                                           | Gallus gallus (Chicken) | PF01086;                         |
| A0A3Q2U5N2 | 427284;    | CLTA                       | Clathrin light chain                                                                                                                                                                                                                                                                      | Clathrin light chain family                                                                                           | Gallus gallus (Chicken) | PF01086;                         |
| Q5ZHR7     | 427284;    | CLTA RCJMB04_33p3          | Clathrin light chain                                                                                                                                                                                                                                                                      | Clathrin light chain family                                                                                           | Gallus gallus (Chicken) | PF01086;                         |

|            |         |                      |                                                                                                                                                           |                                       |                         |                          |
|------------|---------|----------------------|-----------------------------------------------------------------------------------------------------------------------------------------------------------|---------------------------------------|-------------------------|--------------------------|
| A0A1D5PJ40 | 416226; | CLTB                 | Clathrin light chain                                                                                                                                      | Clathrin light chain family           | Gallus gallus (Chicken) | PF01086;                 |
| A0A1D5PL88 | 416226; | CLTB                 | Clathrin light chain                                                                                                                                      | Clathrin light chain family           | Gallus gallus (Chicken) | PF01086;                 |
| Q5ZMG2     | 424910; | CLDN1 RCJMB04_2c8    | Claudin                                                                                                                                                   | Claudin family                        | Gallus gallus (Chicken) | PF00822;                 |
| F1N988     | 417675; | CLUH                 | Clustered mitochondria protein homolog                                                                                                                    | CLU family                            | Gallus gallus (Chicken) | PF13236;PF15044;PF12807; |
| Q9YGP0     | 395722; |                      | Clusterin                                                                                                                                                 | Clusterin family                      | Gallus gallus (Chicken) | PF01093;                 |
| Q5F475     | 418275; | RCJMB04_2h1          | Condensin complex subunit 1                                                                                                                               | CND1 (condensin subunit 1) family     | Gallus gallus (Chicken) | PF12717;PF12922;         |
| A0A1D5PE41 | 769492; | NDUFS8               | Complex I-23kD (NADH dehydrogenase [ubiquinone] iron-sulfur protein 8, mitochondrial) (NADH-ubiquinone oxidoreductase 23 kDa subunit)                     | Complex I 23 kDa subunit family       | Gallus gallus (Chicken) | PF12838;                 |
| A0A1D5PI06 | 426488; | NDUFV2               | NADH dehydrogenase [ubiquinone] flavoprotein 2, mitochondrial (NADH-ubiquinone oxidoreductase 24 kDa subunit)                                             | Complex I 24 kDa subunit family       | Gallus gallus (Chicken) |                          |
| F1ND23     | 423179; | NDUFS3               | Complex I-30kD (NADH dehydrogenase [ubiquinone] iron-sulfur protein 3, mitochondrial) (NADH-ubiquinone oxidoreductase 30 kDa subunit)                     | Complex I 30 kDa subunit family       | Gallus gallus (Chicken) | PF00329;                 |
| Q5ZHS2     | 430210; | RCJMB04_33n14        | NADH dehydrogenase [ubiquinone] flavoprotein 1, mitochondrial (EC 7.1.1.2)                                                                                | Complex I 51 kDa subunit family       | Gallus gallus (Chicken) | PF01512;PF10589;PF10531; |
| F1NXN8     | 424102; | NDUFS1               | NADH-ubiquinone oxidoreductase 75 kDa subunit, mitochondrial                                                                                              | Complex I 75 kDa subunit family       | Gallus gallus (Chicken) | PF00384;PF10588;PF09326; |
| Q5ZJ57     | 424102; | RCJMB04_20j17        | NADH-ubiquinone oxidoreductase 75 kDa subunit, mitochondrial                                                                                              | Complex I 75 kDa subunit family       | Gallus gallus (Chicken) | PF00384;PF10588;PF09326; |
| A0A1D5PNM0 | 420337; | NDUFB9               | Complex I-B22 (NADH dehydrogenase [ubiquinone] 1 beta subcomplex subunit 9) (NADH-ubiquinone oxidoreductase B22 subunit)                                  | Complex I L YR family                 | Gallus gallus (Chicken) | PF05347;                 |
| Q5ZIQ5     | 424032; | RCJMB04_24e8         | NADH dehydrogenase [ubiquinone] 1 alpha subcomplex subunit 10, mitochondrial                                                                              | Complex I NDUFA10 subunit family      | Gallus gallus (Chicken) | PF01712;                 |
| D5M8S5     | 417907; | NDUFA12              | NADH dehydrogenase [ubiquinone] 1 alpha subcomplex subunit 12                                                                                             | Complex I NDUFA12 subunit family      | Gallus gallus (Chicken) | PF05071;                 |
| E1BRT9     | 417753; | NDUFA5               | Complex I subunit B13 (Complex I-13kD-B) (NADH dehydrogenase [ubiquinone] 1 alpha subcomplex subunit 5) (NADH-ubiquinone oxidoreductase 13 kDa-B subunit) | Complex I NDUFA5 subunit family       | Gallus gallus (Chicken) | PF04716;                 |
| A0A1D5P3K4 | 417112; | NDUFA8               | NADH dehydrogenase [ubiquinone] 1 alpha subcomplex subunit 8                                                                                              | Complex I NDUFA8 subunit family       | Gallus gallus (Chicken) | PF06747;                 |
| E1C8C9     | 416543; | NDUFB10              | Complex I-PDSW (NADH dehydrogenase [ubiquinone] 1 beta subcomplex subunit 10) (NADH-ubiquinone oxidoreductase PDSW subunit)                               | Complex I NDUFB10 subunit family      | Gallus gallus (Chicken) | PF10249;                 |
| E1BT94     | 416391; | NDUFB6               | Complex I-B17 (NADH dehydrogenase [ubiquinone] 1 beta subcomplex subunit 6) (NADH-ubiquinone oxidoreductase B17 subunit)                                  | Complex I NDUFB6 subunit family       | Gallus gallus (Chicken) | PF09782;                 |
| Q5ZJW2     | 423763; | NDUFB8 RCJMB04_15e3  | NADH dehydrogenase [ubiquinone] 1 beta subcomplex subunit 8, mitochondrial (Complex I-ASHI) (NADH-ubiquinone oxidoreductase ASHI subunit)                 | Complex I NDUFB8 subunit family       | Gallus gallus (Chicken) | PF05821;                 |
| A0A1L1RM23 | 374122; | NDUFS4               | NADH dehydrogenase [ubiquinone] iron-sulfur protein 4, mitochondrial                                                                                      | Complex I NDUFS4 subunit family       | Gallus gallus (Chicken) | PF04800;                 |
| Q5F402     | 416014; | RCJMB04_3p13         | Coatomer subunit gamma                                                                                                                                    | COPG family                           | Gallus gallus (Chicken) | PF01602;PF16381;PF08752; |
| F1NKY6     | 419134; | CPNE1                | Uncharacterized protein                                                                                                                                   | Copine family                         | Gallus gallus (Chicken) | PF00168;PF07002;         |
| R4GH54     | 421493; | COX20                | Cytochrome c oxidase assembly protein COX20, mitochondrial                                                                                                | COX20 family                          | Gallus gallus (Chicken) | PF12597;                 |
| Q5ZLU7     | 417382; | RCJMB04_4m4          | PCI domain-containing protein                                                                                                                             | CSN1 family                           | Gallus gallus (Chicken) | PF01399;PF10602;         |
| Q5Z180     | 430917; | RCJMB04_29h3         | COP9 signalosome complex subunit 2                                                                                                                        | CSN2 family                           | Gallus gallus (Chicken) | PF01399;                 |
| Q5ZJV0     | 422594; | COPS4 RCJMB04_15i11  | COP9 signalosome complex subunit 4                                                                                                                        | CSN4 family                           | Gallus gallus (Chicken) | PF18420;PF01399;         |
| Q5ZJA1     | 418283; | COPS7A RCJMB04_19i10 | PCI domain-containing protein                                                                                                                             | CSN7/EIF3M family, CSN7 subfamily     | Gallus gallus (Chicken) | PF18392;PF01399;         |
| A0A3Q2U280 | 427301; | SLC44A4              | Uncharacterized protein                                                                                                                                   | CTL (choline transporter-like) family | Gallus gallus (Chicken) | PF04515;                 |
| Q5ZKW2     | 419445; | LZIC RCJMB04_8o19    | Protein LZIC (Leucine zipper and CTNNBIP1 domain-containing protein) (Leucine zipper and ICAT homologous domain-containing protein)                       | CTNNBIP1 family                       | Gallus gallus (Chicken) | PF06384;                 |
| A0A1D5PSR2 | 419561; | CTPS1                | CTP synthase (EC 6.3.4.2) (UTP--ammonia ligase)                                                                                                           | CTP synthase family                   | Gallus gallus (Chicken) | PF06418;PF00117;         |
| E1BYQ3     | 424804; | CUL3                 | CULLIN_2 domain-containing protein                                                                                                                        | Cullin family                         | Gallus gallus (Chicken) | PF00888;PF10557;         |
| P80566     | 395938; | SOD1                 | Superoxide dismutase [Cu-Zn] (EC 1.15.1.1)                                                                                                                | Cu-Zn superoxide dismutase family     | Gallus gallus (Chicken) | PF00080;                 |
| D0EKR3     | 776282; | PPIA                 | Peptidyl-prolyl cis-trans isomerase (PPIase) (EC 5.2.1.8)                                                                                                 | Cyclophilin-type PPIase family        | Gallus gallus (Chicken) | PF00160;                 |



|            |            |                                 |                                                                                                                                                                                                                                  |                                                                         |                         |                                          |
|------------|------------|---------------------------------|----------------------------------------------------------------------------------------------------------------------------------------------------------------------------------------------------------------------------------|-------------------------------------------------------------------------|-------------------------|------------------------------------------|
| E1BXG0     | 419507;    | PPIH                            | Peptidyl-prolyl cis-trans isomerase (PPIase) (EC 5.2.1.8)                                                                                                                                                                        | Cyclophilin-type PPIase family                                          | Gallus gallus (Chicken) | PF00160;                                 |
| A0A1D5PW44 | 100859332; | PPIL1                           | Peptidyl-prolyl cis-trans isomerase (PPIase) (EC 5.2.1.8)                                                                                                                                                                        | Cyclophilin-type PPIase family                                          | Gallus gallus (Chicken) | PF00160;                                 |
| P24367     | 396447;    | PPIB                            | Peptidyl-prolyl cis-trans isomerase B (PPIase B) (EC 5.2.1.8) (Cyclophilin B) (Rotamase B) (S-cyclophilin) (SCYLP)                                                                                                               | Cyclophilin-type PPIase family, PPIase B subfamily                      | Gallus gallus (Chicken) | PF00160;                                 |
| Q5Z104     | 421949;    | CYRIA FAM49A RCJMB04_314        | CYFIP-related Rac1 interactor A                                                                                                                                                                                                  | CYRI family                                                             | Gallus gallus (Chicken) | PF07159;                                 |
| A0A1D5PP47 | 421949;    | FAM49A                          | DUF1394 domain-containing protein                                                                                                                                                                                                | CYRI family                                                             | Gallus gallus (Chicken) | PF07159;                                 |
| A0A1D5PZ00 | 420330;    | FAM49B                          | DUF1394 domain-containing protein                                                                                                                                                                                                | CYRI family                                                             | Gallus gallus (Chicken) | PF07159;                                 |
| A0A3Q2TTC4 | 420330;    | FAM49B                          | DUF1394 domain-containing protein                                                                                                                                                                                                | CYRI family                                                             | Gallus gallus (Chicken) | PF07159;                                 |
| F1NHH1     | 418267;    | CSTB                            | Cystatin domain-containing protein                                                                                                                                                                                               | Cystatin family                                                         | Gallus gallus (Chicken) | PF00031;                                 |
| P01038     | 396497;    |                                 | Cystatin (Egg-white cystatin) (Ovocystatin)                                                                                                                                                                                      | Cystatin family                                                         | Gallus gallus (Chicken) | PF00031;                                 |
| A0A3Q2UDX4 | 418545;    | CBSL                            | Cystathionine beta-synthase (EC 4.2.1.22)                                                                                                                                                                                        | Cysteine synthase/cystathionine beta-synthase family                    | Gallus gallus (Chicken) | PF00571;PF00291;                         |
| E1BYG4     | 418545;    | CBSL                            | Cystathionine beta-synthase (EC 4.2.1.22)                                                                                                                                                                                        | Cysteine synthase/cystathionine beta-synthase family                    | Gallus gallus (Chicken) | PF00571;PF00291;                         |
| P00174     | 414798;    | CYB5A CYB5                      | Cytochrome b5                                                                                                                                                                                                                    | Cytochrome b5 family                                                    | Gallus gallus (Chicken) | PF00173;                                 |
| Q5Z185     | 415865;    | RCJMB04_29I20                   | Cytochrome b5 heme-binding domain-containing protein                                                                                                                                                                             | Cytochrome b5 family                                                    | Gallus gallus (Chicken) | PF00173;                                 |
| Q5ZKN2     | 772196;    | PGRMC1 RCJMB04_7g20 RCJMB04_9p4 | Membrane-associated progesterone receptor component 1 (mPR)                                                                                                                                                                      | Cytochrome b5 family, MAPR subfamily                                    | Gallus gallus (Chicken) | PF00173;                                 |
| P67881     | 420624;    | CYC                             | Cytochrome c                                                                                                                                                                                                                     | Cytochrome c family                                                     | Gallus gallus (Chicken) | PF00034;                                 |
| Q5ZJV5     | 415826;    | COX4I1 RCJMB04_15g7             | Cytochrome c oxidase subunit 4                                                                                                                                                                                                   | Cytochrome c oxidase IV family                                          | Gallus gallus (Chicken) | PF02936;                                 |
| Q805F9     | 374050;    | DDB1 RCJMB04_6h2                | DNA damage-binding protein 1 (DDB p127 subunit) (Damage-specific DNA-binding protein 1) (UV-damaged DNA-binding factor)                                                                                                          | DDB1 family                                                             | Gallus gallus (Chicken) | PF03178;PF10433;                         |
| A0A1D5NXX6 | 425541;    | DDI2                            | Uncharacterized protein                                                                                                                                                                                                          | DDI1 family                                                             | Gallus gallus (Chicken) | PF09668;PF00240;                         |
| F1NNS1     | 425542;    | DDOST                           | Dolichyl-diphosphooligosaccharide-protein glycosyltransferase 48 kDa subunit (Oligosaccharyl transferase 48 kDa subunit)                                                                                                         | DDOST 48 kDa subunit family                                             | Gallus gallus (Chicken) | PF03345;                                 |
| Q5F491     | 418567;    | DDX3X RCJMB04_2a4               | RNA helicase (EC 3.6.4.13)                                                                                                                                                                                                       | DEAD box helicase family                                                | Gallus gallus (Chicken) | PF00270;PF00271;                         |
| A0A1D5PD32 | 418024;    | DDX17                           | RNA helicase (EC 3.6.4.13)                                                                                                                                                                                                       | DEAD box helicase family                                                | Gallus gallus (Chicken) | PF00270;PF00271;                         |
| Q90WU3     | 395249;    | DDX1                            | ATP-dependent RNA helicase DDX1 (EC 3.6.4.13) (DEAD box protein 1)                                                                                                                                                               | DEAD box helicase family, DDX1 subfamily                                | Gallus gallus (Chicken) | PF00270;PF00271;PF00622;                 |
| Q5ZKB9     | 419783;    | DDX6 RCJMB04_11n24              | Probable ATP-dependent RNA helicase DDX6 (EC 3.6.4.13) (DEAD box protein 6)                                                                                                                                                      | DEAD box helicase family, DDX6/DHH1 subfamily                           | Gallus gallus (Chicken) | PF00270;PF00271;                         |
| Q8JFP1     | 395232;    | EIF4A2 RCJMB04_14a6             | Eukaryotic initiation factor 4A-II (eIF-4A-II) (eIF4A-II) (EC 3.6.4.13) (ATP-dependent RNA helicase eIF4A-2)                                                                                                                     | DEAD box helicase family, eIF4A subfamily                               | Gallus gallus (Chicken) | PF00270;PF00271;                         |
| Q5ZM36     | 416704;    | EIF4A3 DDX48 RCJMB04_3e17       | Eukaryotic initiation factor 4A-III (eIF-4A-III) (eIF4A-III) (EC 3.6.4.13) (ATP-dependent RNA helicase DDX48) (ATP-dependent RNA helicase eIF4A-3) (DEAD box protein 48) (Eukaryotic translation initiation factor 4A isoform 3) | DEAD box helicase family, eIF4A subfamily                               | Gallus gallus (Chicken) | PF00270;PF00271;                         |
| A0A3S5ZPN3 | 395629;    | DDX5                            | DEAD box protein 5 (EC 3.6.4.13) (Probable ATP-dependent RNA helicase DDX5)                                                                                                                                                      | DEAD box helicase family; DEAD box helicase family, DDX5/DBP2 subfamily | Gallus gallus (Chicken) | PF00270;PF00271;PF08061;                 |
| Q9W744     | 395629;    |                                 | DEAD box protein 5 (EC 3.6.4.13) (Probable ATP-dependent RNA helicase DDX5)                                                                                                                                                      | DEAD box helicase family; DEAD box helicase family, DDX5/DBP2 subfamily | Gallus gallus (Chicken) | PF00270;PF00271;PF08061;                 |
| E1BXS8     | 420928;    | CMBL                            | Carboxymethylenebutenolidase homolog                                                                                                                                                                                             | Dienelactone hydrolase family                                           | Gallus gallus (Chicken) | PF01738;                                 |
| A3RKL3     | 427317;    | DHFR                            | Dihydrofolate reductase (EC 1.5.1.3)                                                                                                                                                                                             | Dihydrofolate reductase family                                          | Gallus gallus (Chicken) | PF00186;                                 |
| Q5ZIZ6     | 422904;    | RCJMB04_22g9                    | Uncharacterized protein                                                                                                                                                                                                          | D-isomer specific 2-hydroxyacid dehydrogenase family                    | Gallus gallus (Chicken) | PF00389;PF02826;                         |
| B3Y932     | 100431102; | chApex1                         | DNA-(apurinic or apyrimidinic site) endonuclease (EC 3.1.-.-)                                                                                                                                                                    | DNA repair enzymes AP/ExoA family                                       | Gallus gallus (Chicken) | PF03372;                                 |
| E1C0J4     | 420119;    | UPF1                            | Uncharacterized protein                                                                                                                                                                                                          | DNA2/NAM7 helicase family                                               | Gallus gallus (Chicken) | PF13086;PF13087;PF18141;PF04851;PF09416; |
| Q5ZKD7     | 419872;    | MOV10 RCJMB04_11i10             | Putative helicase MOV-10 (EC 3.6.4.13)                                                                                                                                                                                           | DNA2/NAM7 helicase family, SDE3 subfamily                               | Gallus gallus (Chicken) | PF13086;PF13087;                         |
| A0A3Q2UE17 | 424803;    | DOCK10                          | Uncharacterized protein                                                                                                                                                                                                          | DOCK family                                                             | Gallus gallus (Chicken) | PF06920;PF14429;PF11878;PF00169;         |

|            |            |                                    |                                                                                                                                                                                                                                                 |                                          |                                   |                                                                                  |
|------------|------------|------------------------------------|-------------------------------------------------------------------------------------------------------------------------------------------------------------------------------------------------------------------------------------------------|------------------------------------------|-----------------------------------|----------------------------------------------------------------------------------|
| A0A3Q2UEP9 | 424803;    | DOCK10                             | Uncharacterized protein                                                                                                                                                                                                                         | DOCK family                              | Gallus gallus (Chicken)           | PF06920;PF14429;PF11878;PF00169;                                                 |
| A0A3Q3AYC4 | 424803;    | DOCK10                             | Uncharacterized protein                                                                                                                                                                                                                         | DOCK family                              | Gallus gallus (Chicken)           | PF06920;PF14429;PF11878;PF00169;                                                 |
| E1BZN6     | 770021;    | REEP5                              | Receptor expression-enhancing protein                                                                                                                                                                                                           | DP1 family                               | Gallus gallus (Chicken)           | PF03134;                                                                         |
| A0A1D5NUH3 | 769000;    | LOC769000                          | Mothers against decapentaplegic homolog (MAD homolog) (Mothers against DPP homolog) (SMAD family member)                                                                                                                                        | Dwarfing/SMAD family                     | Gallus gallus (Chicken)           | PF03165;PF03166;                                                                 |
| P35458     | 426238;    | DCTN1                              | Dynactin subunit 1 (150 kDa dynein-associated polypeptide) (DAP-150) (DP-150) (p150-glued)                                                                                                                                                      | Dynactin 150 kDa subunit family          | Gallus gallus (Chicken)           | PF01302;PF12455;                                                                 |
| A0A1D5PEZ3 | 426238;    | DCTN1                              | Dynactin subunit 1                                                                                                                                                                                                                              | Dynactin 150 kDa subunit family          | Gallus gallus (Chicken)           | PF01302;PF12455;                                                                 |
| A0A1D5PFB8 | 395587;    | DCTN2                              | Dynactin subunit 2                                                                                                                                                                                                                              | Dynactin subunit 2 family                | Gallus gallus (Chicken)           | PF04912;                                                                         |
| F1NKL4     | 423461;    | DYNC1H1                            | Uncharacterized protein                                                                                                                                                                                                                         | Dynein heavy chain family                | Gallus gallus (Chicken)           | PF12774;PF12780;PF12781;PF18198;PF08385;PF08393;PF17852;PF18199;PF03028;PF12777; |
| Q5ZK94     | 424151;    | RCJMB04_12d24                      | WD_REPEATS_REGION domain-containing protein                                                                                                                                                                                                     | Dynein intermediate chain family         | Gallus gallus (Chicken)           | PF11540;PF00400;                                                                 |
| Q90828     | 420668;    | DYNC1L11 DNCL11                    | Cytoplasmic dynein 1 light intermediate chain 1 (Dynein light chain A) (DLC-A) (Dynein light intermediate chain 1, cytosolic) (LIC57/59)                                                                                                        | Dynein light intermediate chain family   | Gallus gallus (Chicken)           | PF05783;                                                                         |
| Q5ZMQ4     | 415793;    | DYNC1L12 RCJMB04_1g23              | Dynein light intermediate chain                                                                                                                                                                                                                 | Dynein light intermediate chain family   | Gallus gallus (Chicken)           | PF05783;                                                                         |
| Q9YQG1     | 395723;    | EEF1B                              | Elongation factor 1-beta (EF-1-beta)                                                                                                                                                                                                            | EF-1-beta/EF-1-delta family              | Gallus gallus (Chicken)           | PF10587;PF00736;                                                                 |
| Q5ZIE2     | 418606;    | EIF1AX RCJMB04_27j6                | Eukaryotic translation initiation factor 4C                                                                                                                                                                                                     | EIF-1A family                            | Gallus gallus (Chicken)           | PF01176;                                                                         |
| Q6K1L7     | 414740;    | ef1ad                              | Probable RNA-binding protein EIF1AD (Eukaryotic translation initiation factor 1A domain-containing protein) (Protein Obelix)                                                                                                                    | EIF1AD family                            | Gallus gallus (Chicken)           | PF01176;                                                                         |
| Q5ZLX2     | 423279;    | EIF2S1 EIF2A RCJMB04_4i21          | Eukaryotic translation initiation factor 2 subunit 1 (Eukaryotic translation initiation factor 2 subunit alpha) (eIF-2-alpha) (eIF-2A) (eIF-2alpha)                                                                                             | EIF-2-alpha family                       | Gallus gallus (Chicken)           | PF07541;PF00575;                                                                 |
| Q9DEQ6     | 395295;    | EIF2B EIF2S2                       | Eukaryote initiation factor 2 beta                                                                                                                                                                                                              | EIF-2-beta/eIF-5 family                  | Gallus gallus (Chicken)           | PF01873;                                                                         |
| Q5ZIE0     | 423479;    | EIF5 RCJMB04_27j21                 | Eukaryotic translation initiation factor 5                                                                                                                                                                                                      | EIF-2-beta/eIF-5 family                  | Gallus gallus (Chicken)           | PF01873;PF02020;                                                                 |
| F1NDA1     | 419845;    | EIF2D                              | Eukaryotic translation initiation factor 2D (Ligatin)                                                                                                                                                                                           | EIF2D family                             | Gallus gallus (Chicken)           | PF17832;PF01253;                                                                 |
| E1BSS3     | 423927;    | EIF3A EIF3S10                      | Eukaryotic translation initiation factor 3 subunit A (eIF3a) (Eukaryotic translation initiation factor 3 subunit 10) (eIF-3-theta)                                                                                                              | EIF-3 subunit A family                   | Gallus gallus (Chicken)           | PF01399;                                                                         |
| F1NCE1     | 771356;    | EIF3D EIF3S7                       | Eukaryotic translation initiation factor 3 subunit D (eIF3d) (Eukaryotic translation initiation factor 3 subunit 7)                                                                                                                             | EIF-3 subunit D family                   | Gallus gallus (Chicken)           | PF05091;                                                                         |
| Q5ZLA5     | 420272;    | EIF3E EIF3S6 RCJMB04_6o19          | Eukaryotic translation initiation factor 3 subunit E (eIF3e) (Eukaryotic translation initiation factor 3 subunit 6)                                                                                                                             | EIF-3 subunit E family                   | Gallus gallus (Chicken)           | PF09440;PF01399;                                                                 |
| Q5ZKA4     | 415573;    | EIF3J EIF3S1 RCJMB04_12b11         | Eukaryotic translation initiation factor 3 subunit J (eIF3j) (Eukaryotic translation initiation factor 3 subunit 1) (eIF-3-alpha) (eIF3 p35)                                                                                                    | EIF-3 subunit J family                   | Gallus gallus (Chicken)           | PF08597;                                                                         |
| Q5F428     | 418033;    | EIF3L EIF3EIP EIF3S6IP RCJMB04_3i6 | Eukaryotic translation initiation factor 3 subunit L (eIF3l)                                                                                                                                                                                    | EIF-3 subunit L family                   | Gallus gallus (Chicken)           | PF10255;                                                                         |
| Q5ZJ64     | 421602;    | EIF3M RCJMB04_20g2                 | Eukaryotic translation initiation factor 3 subunit M (eIF3m)                                                                                                                                                                                    | EIF-3 subunit M family                   | Gallus gallus (Chicken)           | PF18005;PF01399;                                                                 |
| G3UQA9     | 100550619; | EIF6                               | Eukaryotic translation initiation factor 6 (eIF-6)                                                                                                                                                                                              | EIF-6 family                             | Meleagris gallopavo (Wild turkey) | PF01912;                                                                         |
| Q5F345     | 424564;    | ELOVL1 RCJMB04_35f19               | Elongation of very long chain fatty acids protein (EC 2.3.1.199) (Very-long-chain 3-oxoacyl-CoA synthase)                                                                                                                                       | ELO family                               | Gallus gallus (Chicken)           | PF01151;                                                                         |
| E3VVM5     | 424564;    | ELOVL1                             | Elongation of very long chain fatty acids protein 1 (EC 2.3.1.199) (3-keto acyl-CoA synthase ELOVL1) (ELOVL fatty acid elongase 1) (ELOVL FA elongase 1) (Very long chain 3-ketoacyl-CoA synthase 1) (Very long chain 3-oxoacyl-CoA synthase 1) | ELO family; ELO family, ELOVL1 subfamily | Gallus gallus (Chicken)           | PF01151;                                                                         |
| Q5ZL00     | 419470;    | EMC1 RCJMB04_8i12                  | ER membrane protein complex subunit 1                                                                                                                                                                                                           | EMC1 family                              | Gallus gallus (Chicken)           | PF07774;PF13360;                                                                 |
| A0A3Q2UDL9 | 420273;    | EMC2                               | ER membrane protein complex subunit 2                                                                                                                                                                                                           | EMC2 family                              | Gallus gallus (Chicken)           |                                                                                  |
| E1BQV4     | 415936;    | EMC3                               | ER membrane protein complex subunit 3                                                                                                                                                                                                           | EMC3 family                              | Gallus gallus (Chicken)           | PF01956;                                                                         |
| Q5ZMT4     | 424499;    | TMED5 RCJMB04_1d20                 | GOLD domain-containing protein                                                                                                                                                                                                                  | EMP24/GP25L family                       | Gallus gallus (Chicken)           | PF01105;                                                                         |
| Q5ZLF6     | 769360;    | RCJMB04_6g23                       | GOLD domain-containing protein                                                                                                                                                                                                                  | EMP24/GP25L family                       | Gallus gallus (Chicken)           | PF01105;                                                                         |
| Q5ZIR6     | 423362;    | RCJMB04_24a4                       | GOLD domain-containing protein                                                                                                                                                                                                                  | EMP24/GP25L family                       | Gallus gallus (Chicken)           | PF01105;                                                                         |
| O93263     | 374180;    |                                    | Avena                                                                                                                                                                                                                                           | Ena/VASP family                          | Gallus gallus (Chicken)           | PF08776;PF00568;                                                                 |

|            |         |                               |                                                                                                                                                                                                                                     |                                                                            |                         |                          |
|------------|---------|-------------------------------|-------------------------------------------------------------------------------------------------------------------------------------------------------------------------------------------------------------------------------------|----------------------------------------------------------------------------|-------------------------|--------------------------|
| Q90YB5     | 374180; |                               | AvEna neural variant                                                                                                                                                                                                                | Ena/VASP family                                                            | Gallus gallus (Chicken) | PF08776;PF00568;         |
| Q9DEG2     | 374180; | avenall                       | Avenall                                                                                                                                                                                                                             | Ena/VASP family                                                            | Gallus gallus (Chicken) | PF08776;PF00568;         |
| Q8AXV0     | 395202; | SH3GL1 SH3P8                  | Endophilin-A2 (Endophilin-2) (SH3 domain-containing GRB2-like protein 2) (SH3p8)                                                                                                                                                    | Endophilin family                                                          | Gallus gallus (Chicken) | PF03114;PF00018;         |
| Q5ZIR1     | 424522; | SH3GLB1<br>RCJMB04_24b23      | Endophilin-B1 (SH3 domain-containing GRB2-like protein B1)                                                                                                                                                                          | Endophilin family                                                          | Gallus gallus (Chicken) | PF03114;PF14604;         |
| P51913     | 396017; | ENO1                          | Alpha-enolase (EC 4.2.1.11) (2-phospho-D-glycerate hydro-lyase) (Phosphopyruvate hydratase)                                                                                                                                         | Enolase family                                                             | Gallus gallus (Chicken) | PF00113;PF03952;         |
| Q5ZJ60     | 423979; | HIBCH RCJMB04_20j11           | 3-hydroxyisobutyryl-CoA hydrolase, mitochondrial (EC 3.1.2.4) (3-hydroxyisobutyryl-coenzyme A hydrolase) (HIB-CoA hydrolase) (HIBYL-CoA-H)                                                                                          | Enoyl-CoA hydratase/isomerase family                                       | Gallus gallus (Chicken) | PF16113;                 |
| A0A1D5NTK1 | 423979; | HIBCH                         | 3-hydroxyisobutyryl-CoA hydrolase, mitochondrial (EC 3.1.2.4) (3-hydroxyisobutyryl-coenzyme A hydrolase)                                                                                                                            | Enoyl-CoA hydratase/isomerase family                                       | Gallus gallus (Chicken) | PF16113;                 |
| A0A3Q2U419 | 427269; | AUH                           | Uncharacterized protein                                                                                                                                                                                                             | Enoyl-CoA hydratase/isomerase family                                       | Gallus gallus (Chicken) | PF00378;                 |
| E1BTQ9     | 427269; | AUH                           | Uncharacterized protein                                                                                                                                                                                                             | Enoyl-CoA hydratase/isomerase family                                       | Gallus gallus (Chicken) | PF00378;                 |
| F1NSS6     | 424646; | ECHDC2                        | Uncharacterized protein                                                                                                                                                                                                             | Enoyl-CoA hydratase/isomerase family                                       | Gallus gallus (Chicken) | PF00378;                 |
| F1NI29     | 395929; | HADHA                         | Enoyl-CoA hydratase (EC 4.2.1.17)                                                                                                                                                                                                   | Enoyl-CoA hydratase/isomerase family; Enoyl-CoA hydratase/isomerase family | Gallus gallus (Chicken) | PF00725;PF02737;PF00378; |
| Q5F381     | 421292; | EPCAM TACSTD1<br>RCJMB04_29h4 | Epithelial cell adhesion molecule (Ep-CAM) (Tumor-associated calcium signal transducer 1)                                                                                                                                           | EPCAM family                                                               | Gallus gallus (Chicken) | PF00086;                 |
| P23913     | 396285; | LBR                           | Delta(14)-sterol reductase LBR (Delta-14-SR) (EC 1.3.1.70) (3-beta-hydroxysterol Delta (14)-reductase) (C-14 sterol reductase) (C14SR) (Integral nuclear envelope inner membrane protein) (Lamin-B receptor) (Sterol C14-reductase) | ERG4/ERG24 family                                                          | Gallus gallus (Chicken) | PF01222;PF09465;         |
| E1C2I3     | 416205; | ERGIC1                        | Uncharacterized protein                                                                                                                                                                                                             | ERGIC family                                                               | Gallus gallus (Chicken) | PF07970;PF13850;         |
| E1BXC2     | 418856; | ESD                           | S-formylglutathione hydrolase (EC 3.1.2.12)                                                                                                                                                                                         | Esterase D family                                                          | Gallus gallus (Chicken) | PF00756;                 |
| Q5ZJ46     | 418478; | GABPA RCJMB04_20n8            | Uncharacterized protein                                                                                                                                                                                                             | ETS family                                                                 | Gallus gallus (Chicken) | PF00178;PF11620;PF02198; |
| F1NLE4     | 428135; | GSS                           | Glutathione synthetase (GSH-S) (EC 6.3.2.3)                                                                                                                                                                                         | Eukaryotic GSH synthase family                                             | Gallus gallus (Chicken) | PF03917;PF03199;         |
| A0A1D5PPQ7 | 422703; | EIF4E                         | Uncharacterized protein                                                                                                                                                                                                             | Eukaryotic initiation factor 4E family                                     | Gallus gallus (Chicken) | PF01652;                 |
| A0A1D5P490 | 424953; | EIF4G1                        | Uncharacterized protein                                                                                                                                                                                                             | Eukaryotic initiation factor 4G family                                     | Gallus gallus (Chicken) | PF02847;PF02854;PF02020; |
| A0A1D5P6I5 | 424953; | EIF4G1                        | Uncharacterized protein                                                                                                                                                                                                             | Eukaryotic initiation factor 4G family                                     | Gallus gallus (Chicken) | PF02847;PF02854;PF02020; |
| A0A1D5PPZ0 | 424953; | EIF4G1                        | Uncharacterized protein                                                                                                                                                                                                             | Eukaryotic initiation factor 4G family                                     | Gallus gallus (Chicken) | PF02847;PF02854;PF02020; |
| E1BSG5     | 424953; | EIF4G1                        | Uncharacterized protein                                                                                                                                                                                                             | Eukaryotic initiation factor 4G family                                     | Gallus gallus (Chicken) | PF02847;PF02854;PF02020; |
| Q5KTT9     | 395905; | NAT1                          | eIF4G-related protein NAT1                                                                                                                                                                                                          | Eukaryotic initiation factor 4G family                                     | Gallus gallus (Chicken) | PF02847;PF02854;PF02020; |
| E1BYN7     | 416320; | VDAC1                         | Voltage-dependent anion-selective channel protein 1                                                                                                                                                                                 | Eukaryotic mitochondrial porin family                                      | Gallus gallus (Chicken) | PF01459;                 |
| F6T197     | 395498; | VDAC2                         | Voltage-dependent anion-selective channel protein 2                                                                                                                                                                                 | Eukaryotic mitochondrial porin family                                      | Gallus gallus (Chicken) | PF01459;                 |
| Q9I9D1     | 395498; | VDAC2                         | Voltage-dependent anion-selective channel protein 2                                                                                                                                                                                 | Eukaryotic mitochondrial porin family                                      | Gallus gallus (Chicken) | PF01459;                 |
| Q5ZJ50     | 427679; | RCJMB04_20k18                 | Phosphomannomutase (EC 5.4.2.8)                                                                                                                                                                                                     | Eukaryotic PMM family                                                      | Gallus gallus (Chicken) | PF03332;                 |
| A0A1L1RX26 | 416182; | ETF1                          | Eukaryotic peptide chain release factor subunit 1                                                                                                                                                                                   | Eukaryotic release factor 1 family                                         | Gallus gallus (Chicken) | PF03463;PF03464;PF03465; |
| P41125     | 395849; | RPL13 BBC1                    | 60S ribosomal protein L13 (Breast basic conserved protein 1)                                                                                                                                                                        | Eukaryotic ribosomal protein eL13 family                                   | Gallus gallus (Chicken) | PF01294;                 |
| F1NQG5     | 428442; | RPL15                         | Ribosomal protein L15                                                                                                                                                                                                               | Eukaryotic ribosomal protein eL15 family                                   | Gallus gallus (Chicken) | PF00827;                 |
| Q5ZKK8     | 420003; | RPL19 RCJMB04_10e3            | Ribosomal protein L19                                                                                                                                                                                                               | Eukaryotic ribosomal protein eL19 family                                   | Gallus gallus (Chicken) | PF01280;                 |
| R4GIQ2     | 418933; | RPL21                         | 60S ribosomal protein L21                                                                                                                                                                                                           | Eukaryotic ribosomal protein eL21 family                                   | Gallus gallus (Chicken) | PF01157;                 |
| Q98TF8     | 373937; | RPL22                         | 60S ribosomal protein L22                                                                                                                                                                                                           | Eukaryotic ribosomal protein eL22 family                                   | Gallus gallus (Chicken) | PF01776;                 |
| P61355     | 396280; | RPL27                         | 60S ribosomal protein L27                                                                                                                                                                                                           | Eukaryotic ribosomal protein eL27 family                                   | Gallus gallus (Chicken) | PF00467;PF01777;         |

|            |            |                           |                                                                                                                                 |                                                          |                         |                                                  |
|------------|------------|---------------------------|---------------------------------------------------------------------------------------------------------------------------------|----------------------------------------------------------|-------------------------|--------------------------------------------------|
| P67883     | 425416;    | RPL30                     | 60S ribosomal protein L30                                                                                                       | Eukaryotic ribosomal protein eL30 family                 | Gallus gallus (Chicken) | PF01248;                                         |
| F1NQ35     | 424924;    | RPL35A                    | 60S ribosomal protein L35a                                                                                                      | Eukaryotic ribosomal protein eL33 family                 | Gallus gallus (Chicken) | PF01247;                                         |
| Q98TF6     | 373936;    | RPL36                     | 60S ribosomal protein L36                                                                                                       | Eukaryotic ribosomal protein eL36 family                 | Gallus gallus (Chicken) | PF01158;                                         |
| Q8UWG7     | 373957;    | RPL6                      | 60S ribosomal protein L6                                                                                                        | Eukaryotic ribosomal protein eL6 family                  | Gallus gallus (Chicken) | PF01159;PF03868;                                 |
| P32429     | 417158;    | RPL7A SURF-3              | 60S ribosomal protein L7a                                                                                                       | Eukaryotic ribosomal protein eL8 family                  | Gallus gallus (Chicken) | PF01248;                                         |
| F2Z4K7     | 422477;    | RPS3A                     | 40S ribosomal protein S3a                                                                                                       | Eukaryotic ribosomal protein eS1 family                  | Gallus gallus (Chicken) | PF01015;                                         |
| E1C4N0     | 419904;    | RPS10                     | S10_plectin domain-containing protein                                                                                           | Eukaryotic ribosomal protein eS10 family                 | Gallus gallus (Chicken) | PF03501;                                         |
| P84175     | 421698;    | RPS12                     | 40S ribosomal protein S12                                                                                                       | Eukaryotic ribosomal protein eS12 family                 | Gallus gallus (Chicken) | PF01248;                                         |
| A0A1I7Q419 | 421698;    | RPS12                     | 40S ribosomal protein S12                                                                                                       | Eukaryotic ribosomal protein eS12 family                 | Gallus gallus (Chicken) | PF01248;                                         |
| P08636     | 374053;    | RPS17                     | 40S ribosomal protein S17                                                                                                       | Eukaryotic ribosomal protein eS17 family                 | Gallus gallus (Chicken) | PF00833;                                         |
| F1NF89     | 423726;    | RPS24                     | 40S ribosomal protein S24                                                                                                       | Eukaryotic ribosomal protein eS24 family                 | Gallus gallus (Chicken) | PF01282;                                         |
| F1NU56     | 770722;    | RPS25                     | 40S ribosomal protein S25                                                                                                       | Eukaryotic ribosomal protein eS25 family                 | Gallus gallus (Chicken) | PF03297;                                         |
| Q5ZM66     | 100857770; | RPS26 RCJMB04_2p17        | 40S ribosomal protein S26                                                                                                       | Eukaryotic ribosomal protein eS26 family                 | Gallus gallus (Chicken) | PF01283;                                         |
| P47836     | 396001;    | RPS4                      | 40S ribosomal protein S4                                                                                                        | Eukaryotic ribosomal protein eS4 family                  | Gallus gallus (Chicken) | PF16121;PF00467;PF00900;PF08071;PF01479;         |
| P47838     | 396148;    | RPS6                      | 40S ribosomal protein S6                                                                                                        | Eukaryotic ribosomal protein eS6 family                  | Gallus gallus (Chicken) | PF01092;                                         |
| F1NN16     | 421919;    | RPS7                      | 40S ribosomal protein S7                                                                                                        | Eukaryotic ribosomal protein eS7 family                  | Gallus gallus (Chicken) | PF01251;                                         |
| P18660     | 396262;    | RPLP1                     | 60S acidic ribosomal protein P1                                                                                                 | Eukaryotic ribosomal protein P1/P2 family                | Gallus gallus (Chicken) |                                                  |
| A0A1D5PMT8 | 426492;    | RPLP2                     | 60S acidic ribosomal protein P2                                                                                                 | Eukaryotic ribosomal protein P1/P2 family                | Gallus gallus (Chicken) |                                                  |
| A0A1D5PCT2 | 424954;    | POLR2H                    | Uncharacterized protein                                                                                                         | Eukaryotic RPB8 RNA polymerase subunit family            | Gallus gallus (Chicken) | PF03870;                                         |
| A0A1D5PED8 | 424954;    | POLR2H                    | Uncharacterized protein                                                                                                         | Eukaryotic RPB8 RNA polymerase subunit family            | Gallus gallus (Chicken) | PF03870;                                         |
| E1BSD8     | 424954;    | POLR2H                    | DNA-directed RNA polymerases I, II, and III subunit RPABC3                                                                      | Eukaryotic RPB8 RNA polymerase subunit family            | Gallus gallus (Chicken) | PF03870;                                         |
| A0A1D5P8H7 | 421192;    | XPO1                      | Importin N-terminal domain-containing protein                                                                                   | Exportin family                                          | Gallus gallus (Chicken) | PF08767;PF18777;PF18784;PF18787;PF03810;PF08389; |
| Q5ZLT0     | 426925;    | XPO7 RCJMB04_4p4          | Exportin-7                                                                                                                      | Exportin family                                          | Gallus gallus (Chicken) | PF03810;                                         |
| A0A1D5PWR9 | 426925;    | XPO7                      | Exportin-7                                                                                                                      | Exportin family                                          | Gallus gallus (Chicken) | PF03810;                                         |
| P13127     | 396521;    | CAPZA1                    | F-actin-capping protein subunit alpha-1 (Beta-actinin subunit I) (CapZ 36/32)                                                   | F-actin-capping protein alpha subunit family             | Gallus gallus (Chicken) | PF01267;                                         |
| P28497     | 417771;    | CAPZA2                    | F-actin-capping protein subunit alpha-2 (Beta-actinin subunit I) (CapZ 36/32)                                                   | F-actin-capping protein alpha subunit family             | Gallus gallus (Chicken) | PF01267;                                         |
| A0M8U0     | 417771;    | CAPZA2                    | F-actin-capping protein subunit alpha                                                                                           | F-actin-capping protein alpha subunit family             | Gallus gallus (Chicken) | PF01267;                                         |
| P14315     | 396418;    | CAPZB                     | F-actin-capping protein subunit beta isoforms 1 and 2 (Beta-actinin subunit II) (CapZ 36/32) (CapZ B1 and B2)                   | F-actin-capping protein beta subunit family              | Gallus gallus (Chicken) | PF01115;                                         |
| Q9YHT1     | 395758;    | SDHA                      | Succinate dehydrogenase [ubiquinone] flavoprotein subunit, mitochondrial (EC 1.3.5.1) (Flavoprotein subunit of complex II) (Fp) | FAD-dependent oxidoreductase 2 family, FRD/SDH subfamily | Gallus gallus (Chicken) | PF00890;PF02910;                                 |
| F1NPJ4     | 395758;    | SDHA                      | Succinate dehydrogenase [ubiquinone] flavoprotein subunit, mitochondrial (EC 1.3.5.1)                                           | FAD-dependent oxidoreductase 2 family, FRD/SDH subfamily | Gallus gallus (Chicken) | PF00890;PF02910;                                 |
| Q5ZLF0     | 418003;    | ST13 FAM10A1 RCJMB04_6h13 | Hsc70-interacting protein (Hip) (Protein FAM10A1) (Protein ST13 homolog)                                                        | FAM10 family                                             | Gallus gallus (Chicken) | PF18253;PF17830;PF13181;                         |
| D5LPR1     | 416485;    | FSCN1                     | Fascin                                                                                                                          | Fascin family                                            | Gallus gallus (Chicken) | PF06268;                                         |
| P08267     | 395970;    | FTH                       | Ferritin heavy chain (Ferritin H subunit) (EC 1.16.3.1)                                                                         | Ferritin family                                          | Gallus gallus (Chicken) | PF00210;                                         |
| O42479     | 374020;    | FECH                      | Ferrochelatase, mitochondrial (EC 4.99.1.1) (Heme synthase) (Protoheme ferro-lyase)                                             | Ferrochelatase family                                    | Gallus gallus (Chicken) | PF00762;                                         |

|            |         |                     |                                                                                                                                                                                                                                                                                                                                                                                                                                                      |                                                                                              |                         |                                                  |
|------------|---------|---------------------|------------------------------------------------------------------------------------------------------------------------------------------------------------------------------------------------------------------------------------------------------------------------------------------------------------------------------------------------------------------------------------------------------------------------------------------------------|----------------------------------------------------------------------------------------------|-------------------------|--------------------------------------------------|
| O73775     | 373979; | FBLN1               | Fibulin-1 (FIBL-1)                                                                                                                                                                                                                                                                                                                                                                                                                                   | Fibulin family                                                                               | Gallus gallus (Chicken) | PF01821;PF12662;PF07645;                         |
| A0A1L1RU28 | 373979; | FBLN1               | Fibulin-1                                                                                                                                                                                                                                                                                                                                                                                                                                            | Fibulin family                                                                               | Gallus gallus (Chicken) | PF01821;PF12662;PF07645;                         |
| F1NWN4     | 427583; | FBLN2               | Uncharacterized protein                                                                                                                                                                                                                                                                                                                                                                                                                              | Fibulin family                                                                               | Gallus gallus (Chicken) | PF12662;PF07645;                                 |
| Q90WF1     | 395261; |                     | Filamin                                                                                                                                                                                                                                                                                                                                                                                                                                              | Filamin family                                                                               | Gallus gallus (Chicken) | PF00307;PF00630;                                 |
| A0A1D5NYG3 | 378913; | FLNB                | Uncharacterized protein                                                                                                                                                                                                                                                                                                                                                                                                                              | Filamin family                                                                               | Gallus gallus (Chicken) | PF00307;PF00630;                                 |
| A0A1D5PXM1 | 378913; | FLNB                | Uncharacterized protein                                                                                                                                                                                                                                                                                                                                                                                                                              | Filamin family                                                                               | Gallus gallus (Chicken) | PF00307;PF00630;                                 |
| Q90WF0     | 395260; |                     | CgABP260                                                                                                                                                                                                                                                                                                                                                                                                                                             | Filamin family                                                                               | Gallus gallus (Chicken) | PF00307;PF00630;                                 |
| A0A1D5P6W8 | 419571; | KDM1A               | Lysine-specific histone demethylase (EC 1.-.-.-)                                                                                                                                                                                                                                                                                                                                                                                                     | Flavin monoamine oxidase family                                                              | Gallus gallus (Chicken) | PF01593;PF04433;                                 |
| F1NIY7     | 418563; | MAOA                | Amine oxidase (EC 1.4.3.-)                                                                                                                                                                                                                                                                                                                                                                                                                           | Flavin monoamine oxidase family                                                              | Gallus gallus (Chicken) | PF01593;                                         |
| Q5F4B5     | 418563; | RCJMB04_1d13        | Amine oxidase (EC 1.4.3.-)                                                                                                                                                                                                                                                                                                                                                                                                                           | Flavin monoamine oxidase family                                                              | Gallus gallus (Chicken) | PF01593;                                         |
| F1NZY9     | 418220; | CYB5R1              | NADH-cytochrome b5 reductase (EC 1.6.2.2)                                                                                                                                                                                                                                                                                                                                                                                                            | Flavoprotein pyridine nucleotide cytochrome reductase family                                 | Gallus gallus (Chicken) | PF00970;PF00175;                                 |
| Q8QH01     | 395267; | FMO3                | Dimethylaniline monooxygenase [N-oxide-forming] (EC 1.14.13.8)                                                                                                                                                                                                                                                                                                                                                                                       | FMO family                                                                                   | Gallus gallus (Chicken) | PF00743;                                         |
| P02752     | 396449; |                     | Riboflavin-binding protein (RBP) [Cleaved into: Riboflavin-binding protein, plasma form; Riboflavin-binding protein, yolk major form; Riboflavin-binding protein, yolk minor form]                                                                                                                                                                                                                                                                   | Folate receptor family                                                                       | Gallus gallus (Chicken) | PF03024;                                         |
| A0A140T8H8 | 396449; | RBP                 | Folate_rec domain-containing protein                                                                                                                                                                                                                                                                                                                                                                                                                 | Folate receptor family                                                                       | Gallus gallus (Chicken) | PF03024;                                         |
| F1NMC3     | 423508; | MTHFD1              | C-1-tetrahydrofolate synthase, cytoplasmic (EC 1.5.1.5) (EC 3.5.4.9) (EC 6.3.4.3) (Formyltetrahydrofolate synthetase) (Methylenetetrahydrofolate cyclohydrolase) (Methylenetetrahydrofolate dehydrogenase)                                                                                                                                                                                                                                           | Formate-tetrahydrofolate ligase family; Tetrahydrofolate dehydrogenase/cyclohydrolase family | Gallus gallus (Chicken) | PF01268;PF00763;PF02882;                         |
| Q5Z176     | 423508; | RCJMB04_29j22       | C-1-tetrahydrofolate synthase, cytoplasmic (EC 1.5.1.5) (EC 3.5.4.9) (EC 6.3.4.3) (Formyltetrahydrofolate synthetase) (Methylenetetrahydrofolate cyclohydrolase) (Methylenetetrahydrofolate dehydrogenase)                                                                                                                                                                                                                                           | Formate-tetrahydrofolate ligase family; Tetrahydrofolate dehydrogenase/cyclohydrolase family | Gallus gallus (Chicken) | PF01268;PF00763;PF02882;                         |
| R4GMB6     | 425061; | FDPS                | Farnesyl pyrophosphate synthase                                                                                                                                                                                                                                                                                                                                                                                                                      | FPP/GGPP synthase family                                                                     | Gallus gallus (Chicken) | PF00348;                                         |
| A0A1D5NWX3 | 427092; | GGPS1               | Uncharacterized protein                                                                                                                                                                                                                                                                                                                                                                                                                              | FPP/GGPP synthase family                                                                     | Gallus gallus (Chicken) | PF00348;                                         |
| P50147     | 396367; | GNAI2               | Guanine nucleotide-binding protein G(i) subunit alpha-2 (Adenylate cyclase-inhibiting G alpha protein)                                                                                                                                                                                                                                                                                                                                               | G-alpha family, G(i/o/lz) subfamily                                                          | Gallus gallus (Chicken) | PF00503;                                         |
| Q71RI7     | 374077; | GNA11               | Guanine nucleotide-binding protein G11 alpha-subunit                                                                                                                                                                                                                                                                                                                                                                                                 | G-alpha family, G(q) subfamily                                                               | Gallus gallus (Chicken) | PF00503;                                         |
| E1BS74     | 474379; | GNAL                | Uncharacterized protein                                                                                                                                                                                                                                                                                                                                                                                                                              | G-alpha family, G(s) subfamily                                                               | Gallus gallus (Chicken) | PF00503;                                         |
| Q5F4B3     | 422296; | TMLHE RCJMB04_1d18  | Trimethyllysine dioxygenase, mitochondrial (EC 1.14.11.8) (Epsilon-trimethyllysine 2-oxoglutarate dioxygenase) (TML hydroxylase) (TML-alpha-ketoglutarate dioxygenase) (TML dioxygenase) (TMLD)                                                                                                                                                                                                                                                      | Gamma-BBH/TMLD family                                                                        | Gallus gallus (Chicken) | PF06155;PF02668;                                 |
| P21872     | 395315; | GART                | Trifunctional purine biosynthetic protein adenosine-3 [Includes: Phosphoribosylamine-glycine ligase (EC 6.3.4.13) (Glycinamide ribonucleotide synthetase) (GARS) (Phosphoribosylglycinamide synthetase); Phosphoribosylformylglycinamide cyclo-ligase (EC 6.3.3.1) (AIR synthase) (AIRS) (Phosphoribosyl-aminimidazole synthetase); Phosphoribosylglycinamide formyltransferase (EC 2.1.2.2) (5-phosphoribosylglycinamide formyltransferase) (GART)] | GARS family; AIR synthase family; GART family                                                | Gallus gallus (Chicken) | PF00586;PF02769;PF00551;PF01071;PF02843;PF02844; |
| A0A547     | 395315; | GART                | Trifunctional purine biosynthetic protein adenosine-3 [Includes: Phosphoribosylamine-glycine ligase (EC 6.3.4.13) (Glycinamide ribonucleotide synthetase) (GARS) (Phosphoribosylglycinamide synthetase); Phosphoribosylformylglycinamide cyclo-ligase (EC 6.3.3.1) (AIR synthase) (AIRS) (Phosphoribosyl-aminimidazole synthetase); Phosphoribosylglycinamide formyltransferase (EC 2.1.2.2) (5-phosphoribosylglycinamide formyltransferase) (GART)] | GARS family; GARS family; AIR synthase family                                                | Gallus gallus (Chicken) | PF00586;PF02769;PF00551;PF01071;PF02843;PF02844; |
| F1N9W3     | 422480; | GATB PET112 PET112L | Glutamy-tRNA(Gln) amidotransferase subunit B, mitochondrial (Glu-AdT subunit B) (EC 6.3.5.-) (Cytochrome oxidase assembly factor PET112 homolog) (PET112-like)                                                                                                                                                                                                                                                                                       | GatB/GatE family, GatB subfamily                                                             | Gallus gallus (Chicken) | PF02934;PF02637;                                 |
| F1NAK4     | 416982; | GCN1                | TOG domain-containing protein                                                                                                                                                                                                                                                                                                                                                                                                                        | GCN1 family                                                                                  | Gallus gallus (Chicken) |                                                  |
| A0A1D5PBT2 | 423826; | ENTPD1              | Uncharacterized protein                                                                                                                                                                                                                                                                                                                                                                                                                              | GDA1/CD39 NTPase family                                                                      | Gallus gallus (Chicken) | PF01150;                                         |
| F1N851     | 423826; | ENTPD1              | Uncharacterized protein                                                                                                                                                                                                                                                                                                                                                                                                                              | GDA1/CD39 NTPase family                                                                      | Gallus gallus (Chicken) | PF01150;                                         |
| Q5ZMN7     | 415596; | RCJMB04_1f18        | Uncharacterized protein                                                                                                                                                                                                                                                                                                                                                                                                                              | GHMP kinase family, GalK subfamily                                                           | Gallus gallus (Chicken) | PF10509;PF08544;PF00288;                         |
| A0A1D5NUY9 | 395956; | GLI2                | Zinc finger protein GLI2                                                                                                                                                                                                                                                                                                                                                                                                                             | GLI C2H2-type zinc-finger protein family                                                     | Gallus gallus (Chicken) | PF00096;                                         |
| A0A1D5P8Y5 | 395956; | GLI2                | Zinc finger protein GLI2                                                                                                                                                                                                                                                                                                                                                                                                                             | GLI C2H2-type zinc-finger protein family                                                     | Gallus gallus (Chicken) | PF00096;                                         |
| F1P5L2     | 395956; | GLI2                | Zinc finger protein GLI2                                                                                                                                                                                                                                                                                                                                                                                                                             | GLI C2H2-type zinc-finger protein family                                                     | Gallus gallus (Chicken) | PF00096;                                         |
| Q9PSZ4     | 395956; | gli2/gli4           | Zn finger transcription factor (Fragment)                                                                                                                                                                                                                                                                                                                                                                                                            | GLI C2H2-type zinc-finger protein family                                                     | Gallus gallus (Chicken) | PF00096;                                         |
| Q5QRU7     | 427802; | CYGB                | Cytoglobin                                                                                                                                                                                                                                                                                                                                                                                                                                           | Globin family                                                                                | Gallus gallus (Chicken) | PF00042;                                         |

|            |            |                     |                                                                                                                      |                                                                                             |                         |                          |
|------------|------------|---------------------|----------------------------------------------------------------------------------------------------------------------|---------------------------------------------------------------------------------------------|-------------------------|--------------------------|
| P02112     | 396485;    | HBB                 | Hemoglobin subunit beta (Beta-globin) (Hemoglobin beta chain)                                                        | Globin family                                                                               | Gallus gallus (Chicken) | PF00042;                 |
| P02127     | 419079;    |                     | Hemoglobin subunit rho (Hemoglobin rho chain) (Rho-globin)                                                           | Globin family                                                                               | Gallus gallus (Chicken) | PF00042;                 |
| P01994     | 416652;    | HBAA                | Hemoglobin subunit alpha-A (Alpha-A-globin) (Hemoglobin alpha-A chain)                                               | Globin family                                                                               | Gallus gallus (Chicken) | PF00042;                 |
| P02001     | 416651;    | HBAD                | Hemoglobin subunit alpha-D (Alpha-D-globin) (Hemoglobin alpha-D chain)                                               | Globin family                                                                               | Gallus gallus (Chicken) | PF00042;                 |
| P02128     | 107049060; | HBE                 | Hemoglobin subunit epsilon (Epsilon-globin) (Hemoglobin epsilon chain)                                               | Globin family                                                                               | Gallus gallus (Chicken) | PF00042;                 |
| Q90864     | 428114;    | HBE1                | Beta-H globin                                                                                                        | Globin family                                                                               | Gallus gallus (Chicken) | PF00042;                 |
| P02007     | 416650;    |                     | Hemoglobin subunit pi (Hemoglobin pi chain) (Hemoglobin pi' chain) (Pi-globin)                                       | Globin family                                                                               | Gallus gallus (Chicken) | PF00042;                 |
| A0A1D5NT61 | 423612;    | GLUD2               | Glutamate dehydrogenase (NAD(P)(+)) (EC 1.4.1.3)                                                                     | Glu/Leu/Phe/Val dehydrogenases family                                                       | Gallus gallus (Chicken) | PF00208;PF02812;         |
| Q5ZLA0     | 416341;    | GNPDA1 RCJMB04_7a23 | Glucosamine-6-phosphate isomerase (EC 3.5.99.6) (Glucosamine-6-phosphate deaminase)                                  | Glucosamine/galactosamine-6-phosphate isomerase family                                      | Gallus gallus (Chicken) | PF01182;                 |
| E1C878     | 422772;    | GNPDA2              | Glucosamine-6-phosphate isomerase (EC 3.5.99.6) (Glucosamine-6-phosphate deaminase)                                  | Glucosamine/galactosamine-6-phosphate isomerase family                                      | Gallus gallus (Chicken) | PF01182;                 |
| Q5ZJY1     | 430442;    | PGLS RCJMB04_14h20  | 6-phosphogluconolactonase (6PGL) (EC 3.1.1.31)                                                                       | Glucosamine/galactosamine-6-phosphate isomerase family, 6-phosphogluconolactonase subfamily | Gallus gallus (Chicken) | PF01182;                 |
| F1NQ29     | 421894;    | GCLC                | Glutamate--cysteine ligase (EC 6.3.2.2) (Gamma-ECS) (Gamma-glutamylcysteine synthetase)                              | Glutamate--cysteine ligase type 3 family                                                    | Gallus gallus (Chicken) | PF03074;                 |
| F1P0D2     | 417253;    | GSL                 | Glutamine synthetase (EC 6.3.1.2)                                                                                    | Glutamine synthetase family                                                                 | Gallus gallus (Chicken) | PF00120;PF03951;         |
| P79764     | 396069;    | GLRX GRX            | Glutaredoxin-1 (Thioltransferase-1) (TTase-1)                                                                        | Glutaredoxin family                                                                         | Gallus gallus (Chicken) | PF00462;                 |
| Q8QG67     | 374056;    | GPX4                | Glutathione peroxidase                                                                                               | Glutathione peroxidase family                                                               | Gallus gallus (Chicken) | PF00255;                 |
| E1C697     | 424643;    | GPX7                | Glutathione peroxidase                                                                                               | Glutathione peroxidase family                                                               | Gallus gallus (Chicken) | PF00255;                 |
| P00356     | 374193;    | GAPDH GAPD          | Glyceraldehyde-3-phosphate dehydrogenase (GAPDH) (EC 1.2.1.12) (Peptidyl-cysteine S-nitrosylase GAPDH) (EC 2.6.99.-) | Glyceraldehyde-3-phosphate dehydrogenase family                                             | Gallus gallus (Chicken) | PF02800;PF00044;         |
| E1BYP8     | 421311;    | GPCPD1              | Uncharacterized protein                                                                                              | Glycerophosphoryl diester phosphodiesterase family                                          | Gallus gallus (Chicken) | PF00686;PF03009;         |
| S5ZB27     | 421311;    |                     | Glycerophosphocholine phosphodiesterase GDE1-like protein                                                            | Glycerophosphoryl diester phosphodiesterase family                                          | Gallus gallus (Chicken) | PF00686;PF03009;         |
| A0A1D5P5T7 | 422217;    | GDPD2               | GP-PDE domain-containing protein                                                                                     | Glycerophosphoryl diester phosphodiesterase family                                          | Gallus gallus (Chicken) | PF03009;                 |
| Q7ZZK3     | 378909;    |                     | Alpha-1,4 glucan phosphorylase (EC 2.4.1.1)                                                                          | Glycogen phosphorylase family                                                               | Gallus gallus (Chicken) | PF00343;                 |
| Q5ZME4     | 421248;    | RCJMB04_2f16        | Alpha-1,4 glucan phosphorylase (EC 2.4.1.1)                                                                          | Glycogen phosphorylase family                                                               | Gallus gallus (Chicken) | PF00343;                 |
| A0A1D5P6M3 | 427964;    | GBE1                | 1,4-alpha-glucan branching enzyme (EC 2.4.1.18)                                                                      | Glycosyl hydrolase 13 family, GIGB subfamily                                                | Gallus gallus (Chicken) | PF00128;PF02806;PF02922; |
| A0A1D5PHJ9 | 427964;    | GBE1                | 1,4-alpha-glucan branching enzyme (EC 2.4.1.18)                                                                      | Glycosyl hydrolase 13 family, GIGB subfamily                                                | Gallus gallus (Chicken) | PF00128;PF02806;PF02922; |
| A0A3Q2UNP2 | 427964;    | GBE1                | 1,4-alpha-glucan branching enzyme (EC 2.4.1.18)                                                                      | Glycosyl hydrolase 13 family, GIGB subfamily                                                | Gallus gallus (Chicken) | PF00128;PF02806;PF02922; |
| F1NTQ2     | 427204;    | HEXB                | Beta-hexosaminidase (EC 3.2.1.52)                                                                                    | Glycosyl hydrolase 20 family                                                                | Gallus gallus (Chicken) | PF00728;PF14845;         |
| P00698     | 396218;    | LYZ                 | Lysozyme C (EC 3.2.1.17) (1,4-beta-N-acetylmuramidase C) (Allergen Gal d IV) (allergen Gal d 4)                      | Glycosyl hydrolase 22 family                                                                | Gallus gallus (Chicken) | PF00062;                 |
| P27042     | 395708;    |                     | Lysozyme g (EC 3.2.1.17) (1,4-beta-N-acetylmuramidase) (Goose-type lysozyme)                                         | Glycosyl hydrolase 23 family                                                                | Gallus gallus (Chicken) |                          |
| F1P5H6     | 395708;    | LYG2                | Lysozyme g (EC 3.2.1.17)                                                                                             | Glycosyl hydrolase 23 family                                                                | Gallus gallus (Chicken) |                          |
| F1NJF8     | 396547;    | NAGA                | Alpha-galactosidase (EC 3.2.1.-)                                                                                     | Glycosyl hydrolase 27 family                                                                | Gallus gallus (Chicken) | PF16499;PF17450;         |
| E1BT44     | 422188;    | GLA                 | Alpha-galactosidase (EC 3.2.1.-)                                                                                     | Glycosyl hydrolase 27 family                                                                | Gallus gallus (Chicken) | PF16499;PF17450;         |
| E1BS94     | 421668;    | FUCA2               | Alpha-L-fucosidase (EC 3.2.1.51)                                                                                     | Glycosyl hydrolase 29 family                                                                | Gallus gallus (Chicken) | PF01120;PF16757;         |
| A0A1D5PLC0 | 107049056; | NEU2                | Exo-alpha-sialidase (EC 3.2.1.18)                                                                                    | Glycosyl hydrolase 33 family                                                                | Gallus gallus (Chicken) | PF13088;                 |
| Q5ZLM4     | 420720;    | GLB1 RCJMB04_5f4    | Glyco_hydro_35 domain-containing protein                                                                             | Glycosyl hydrolase 35 family                                                                | Gallus gallus (Chicken) | PF01301;                 |

|            |         |                        |                                                                                                                                                                                                                                                                                            |                                                           |                         |                  |
|------------|---------|------------------------|--------------------------------------------------------------------------------------------------------------------------------------------------------------------------------------------------------------------------------------------------------------------------------------------|-----------------------------------------------------------|-------------------------|------------------|
| A0A3Q2U9V6 | 422561; | GALNT7                 | Polypeptide N-acetylgalactosaminyltransferase (EC 2.4.1.-) (Protein-UDP acetylgalactosaminyltransferase)                                                                                                                                                                                   | Glycosyltransferase 2 family, GaNAc-T subfamily           | Gallus gallus (Chicken) | PF00535;PF00652; |
| F1P077     | 417733; | ALG12                  | Mannosyltransferase (EC 2.4.1.-)                                                                                                                                                                                                                                                           | Glycosyltransferase 22 family                             | Gallus gallus (Chicken) | PF03901;         |
| Q8AWB4     | 395070; | POFUT1 RCJMB04_15p12   | GDP-fucose protein O-fucosyltransferase 1 (EC 2.4.1.221) (Peptide-O-fucosyltransferase 1)                                                                                                                                                                                                  | Glycosyltransferase 65 family                             | Gallus gallus (Chicken) | PF10250;         |
| A0A1L1RZK1 | 421428; | GLO1                   | Lactoylglutathione lyase (EC 4.4.1.5) (Glyoxalase I)                                                                                                                                                                                                                                       | Glyoxalase I family                                       | Gallus gallus (Chicken) | PF00903;         |
| A0A1D5PKI8 | 422234; | GPC4                   | Uncharacterized protein                                                                                                                                                                                                                                                                    | Glypican family                                           | Gallus gallus (Chicken) | PF01153;         |
| E1C3N9     | 427462; | GOLM1                  | Uncharacterized protein                                                                                                                                                                                                                                                                    | GOLM family                                               | Gallus gallus (Chicken) |                  |
| Q5ZMU3     | 415783; | RCJMB04_1c14           | Glucose-6-phosphate isomerase (EC 5.3.1.9)                                                                                                                                                                                                                                                 | GPI family                                                | Gallus gallus (Chicken) | PF00342;         |
| Q07883     | 386572; | GRB2                   | Growth factor receptor-bound protein 2 (Adapter protein GRB2) (SH2/SH3 adapter GRB2)                                                                                                                                                                                                       | GRB2/sem-5/DRK family                                     | Gallus gallus (Chicken) | PF00017;PF00018; |
| Q42283     | 395948; | HSPE1                  | 10 kDa heat shock protein, mitochondrial (Chaperonin 10)                                                                                                                                                                                                                                   | GroES chaperonin family                                   | Gallus gallus (Chicken) | PF00166;         |
| Q5ZHV6     | 422865; | RCJMB04_32n8           | GrpE protein homolog                                                                                                                                                                                                                                                                       | GrpE family                                               | Gallus gallus (Chicken) | PF01025;         |
| Q08393     | 414895; |                        | Glutathione S-transferase (EC 2.5.1.18) (Class-alpha)                                                                                                                                                                                                                                      | GST superfamily, Alpha family                             | Gallus gallus (Chicken) | PF14497;PF02798; |
| Q08392     | 414896; |                        | Glutathione S-transferase (EC 2.5.1.18) (GST class-alpha)                                                                                                                                                                                                                                  | GST superfamily, Alpha family                             | Gallus gallus (Chicken) | PF14497;PF02798; |
| Q9W6J2     | 395612; | GSTA4                  | Glutathione transferase (EC 2.5.1.18)                                                                                                                                                                                                                                                      | GST superfamily, Alpha family                             | Gallus gallus (Chicken) | PF14497;PF02798; |
| A0A1D5NT70 | 395611; | LOC395611              | Glutathione transferase (EC 2.5.1.18)                                                                                                                                                                                                                                                      | GST superfamily, Alpha family                             | Gallus gallus (Chicken) | PF14497;PF02798; |
| P26697     | 396380; |                        | Glutathione S-transferase 3 (EC 2.5.1.18) (GST class-alpha) (GST-CL3)                                                                                                                                                                                                                      | GST superfamily, Alpha family                             | Gallus gallus (Chicken) | PF14497;PF02798; |
| F1NQ52     | 396380; | LOC396380              | Glutathione transferase (EC 2.5.1.18)                                                                                                                                                                                                                                                      | GST superfamily, Alpha family                             | Gallus gallus (Chicken) | PF14497;PF02798; |
| F1N9G6     | 418302; | GSTK1                  | Glutathione S-transferase kappa (EC 2.5.1.18)                                                                                                                                                                                                                                              | GST superfamily, Kappa family                             | Gallus gallus (Chicken) | PF01323;         |
| P20136     | 395976; | GSTM2                  | Glutathione S-transferase 2 (EC 2.5.1.18) (GST class-mu) (GST-CL2) (GSTM1-1)                                                                                                                                                                                                               | GST superfamily, Mu family                                | Gallus gallus (Chicken) | PF00043;PF02798; |
| O73888     | 395863; | HPGDS GSTS PGDS PTGDS2 | Hematopoietic prostaglandin D synthase (H-PGDS) (EC 5.3.99.2) (GST class-sigma) (Glutathione S-transferase) (EC 2.5.1.18) (Glutathione-dependent PGD synthase) (Glutathione-requiring prostaglandin D synthase) (Prostaglandin-H2 D-isomerase)                                             | GST superfamily, Sigma family                             | Gallus gallus (Chicken) | PF14497;PF02798; |
| A0A1D5PFS2 | 422311; | RRAGA                  | Ras-related GTP-binding protein                                                                                                                                                                                                                                                            | GTR/RAG GTP-binding protein family                        | Gallus gallus (Chicken) | PF04670;         |
| A0A1D5P856 | 416385; | HDHD2                  | STAS domain-containing protein                                                                                                                                                                                                                                                             | HAD-like hydrolase superfamily                            | Gallus gallus (Chicken) | PF13344;         |
| F1NC58     | 771207; | PDXP                   | Uncharacterized protein                                                                                                                                                                                                                                                                    | HAD-like hydrolase superfamily                            | Gallus gallus (Chicken) | PF13344;         |
| Q5F4B1     | 416559; | PGP RCJMB04_1e2        | Glycerol-3-phosphate phosphatase (G3PP) (EC 3.1.3.21) (Aspartate-based ubiquitous Mg(2+)-dependent phosphatase) (AUM) (EC 3.1.3.48) (Phosphoglycolate phosphatase) (PGP)                                                                                                                   | HAD-like hydrolase superfamily, CbbY/CbbZ/GphY/IEH family | Gallus gallus (Chicken) | PF13344;         |
| F1NLH9     | 424390; | ITPA                   | Inosine triphosphate pyrophosphatase (ITPase) (Inosine triphosphatase) (EC 3.6.1.9) (Non-canonical purine NTP pyrophosphatase) (Non-standard purine NTP pyrophosphatase) (Nucleoside-triphosphate diphosphatase) (Nucleoside-triphosphate pyrophosphatase) (NTPase)                        | HAM1 NTPase family                                        | Gallus gallus (Chicken) | PF01725;         |
| Q5XXA9     | 431605; | PSIP1 LEDGF            | Lens epithelium-derived growth factor                                                                                                                                                                                                                                                      | HDGF family                                               | Gallus gallus (Chicken) | PF11467;PF00855; |
| F1NXS9     | 431605; | PSIP1                  | Lens epithelium-derived growth factor                                                                                                                                                                                                                                                      | HDGF family                                               | Gallus gallus (Chicken) | PF11467;PF00855; |
| P08106     | 423504; |                        | Heat shock 70 kDa protein (HSP70)                                                                                                                                                                                                                                                          | Heat shock protein 70 family                              | Gallus gallus (Chicken) | PF00012;         |
| A0A346RQZ3 | 423504; | HSP70                  | Heat shock protein 70                                                                                                                                                                                                                                                                      | Heat shock protein 70 family                              | Gallus gallus (Chicken) | PF00012;         |
| Q90593     | 396487; | HSPA5 GRP78            | Endoplasmic reticulum chaperone BIP (EC 3.6.4.10) (78 kDa glucose-regulated protein) (GRP-78) (Binding-immunoglobulin protein) (BIP) (Heat shock protein 70 family protein 5) (HSP70 family protein 5) (Heat shock protein family A member 5) (Immunoglobulin heavy chain-binding protein) | Heat shock protein 70 family                              | Gallus gallus (Chicken) | PF00012;         |
| O73885     | 395853; | HSPA8 HSC70            | Heat shock cognate 71 kDa protein (Heat shock 70 kDa protein 8)                                                                                                                                                                                                                            | Heat shock protein 70 family                              | Gallus gallus (Chicken) | PF00012;         |
| A0A1D5PPF8 | 416339; | HSPA4                  | Heat shock 70 kDa protein 4                                                                                                                                                                                                                                                                | Heat shock protein 70 family                              | Gallus gallus (Chicken) | PF00012;         |
| Q5F3J8     | 422496; | RCJMB04_15d24          | Uncharacterized protein                                                                                                                                                                                                                                                                    | Heat shock protein 70 family                              | Gallus gallus (Chicken) | PF00012;         |
| Q5ZM98     | 416183; | HSPA9 RCJMB04_2m8      | Stress-70 protein, mitochondrial (75 kDa glucose-regulated protein) (GRP-75) (Heat shock 70 kDa protein 9)                                                                                                                                                                                 | Heat shock protein 70 family                              | Gallus gallus (Chicken) | PF00012;         |
| Q5ZLK7     | 428251; | HYOU1 RCJMB04_5I9      | Hypoxia up-regulated protein 1                                                                                                                                                                                                                                                             | Heat shock protein 70 family                              | Gallus gallus (Chicken) | PF00012;         |

|            |                                                               |                                                          |                                                                                                                                     |                                                                                            |                         |                                          |
|------------|---------------------------------------------------------------|----------------------------------------------------------|-------------------------------------------------------------------------------------------------------------------------------------|--------------------------------------------------------------------------------------------|-------------------------|------------------------------------------|
| P11501     | 423463;                                                       | HSP90AA1 HSPCA                                           | Heat shock protein HSP 90-alpha                                                                                                     | Heat shock protein 90 family                                                               | Gallus gallus (Chicken) | PF02518;PF00183;                         |
| Q04619     | 396188;                                                       | HSP90AB1 HSPCB                                           | Heat shock cognate protein HSP 90-beta                                                                                              | Heat shock protein 90 family                                                               | Gallus gallus (Chicken) | PF02518;PF00183;                         |
| F1NC33     | 396188;                                                       | HSP90AB1                                                 | Heat shock cognate protein HSP 90-beta                                                                                              | Heat shock protein 90 family                                                               | Gallus gallus (Chicken) | PF02518;PF00183;                         |
| P08110     | 374163;                                                       | HSP90B1 TRA1                                             | Endoplasmic (Heat shock 108 kDa protein) (HSP 108) (HSP108) (Heat shock protein 90 kDa beta member 1) (Transferrin-binding protein) | Heat shock protein 90 family                                                               | Gallus gallus (Chicken) | PF02518;PF00183;                         |
| Q5ZMB2     | 417961;                                                       | HEBP1 RCJMB04_2k3                                        | Heme-binding protein 1                                                                                                              | HEBP family                                                                                | Gallus gallus (Chicken) | PF04832;                                 |
| E1C7J0     | 416663;                                                       | HMOX2                                                    | Heme oxygenase (EC 1.14.14.18)                                                                                                      | Heme oxygenase family                                                                      | Gallus gallus (Chicken) | PF01126;                                 |
| Q8AYP8     | 373889;                                                       | HK1                                                      | Hexokinase (EC 2.7.1.1)                                                                                                             | Hexokinase family                                                                          | Gallus gallus (Chicken) | PF00349;PF03727;                         |
| Q8AYP7     | 374044;                                                       | HK2                                                      | Hexokinase (EC 2.7.1.1)                                                                                                             | Hexokinase family                                                                          | Gallus gallus (Chicken) | PF00349;PF03727;                         |
| Q5ZL9      | 420632;                                                       | HIBADH RCJMB04_5p10                                      | 3-hydroxyisobutyrate dehydrogenase (HIBADH) (EC 1.1.1.31)                                                                           | HIBADH-related family; HIBADH-related family, 3-hydroxyisobutyrate dehydrogenase subfamily | Gallus gallus (Chicken) | PF14833;PF03446;                         |
| P56517     | 373961;                                                       | HDAC1 HDAC1A                                             | Histone deacetylase 1 (HD1) (EC 3.5.1.98)                                                                                           | Histone deacetylase family, HD type 1 subfamily                                            | Gallus gallus (Chicken) | PF00850;                                 |
| P02259     | 693250;                                                       |                                                          | Histone H5                                                                                                                          | Histone H1/H5 family                                                                       | Gallus gallus (Chicken) | PF00538;                                 |
| P08285     | 100858354;                                                    |                                                          | Histone H1.03                                                                                                                       | Histone H1/H5 family                                                                       | Gallus gallus (Chicken) | PF00538;                                 |
| P08287     | 427892;                                                       |                                                          | Histone H1.11L                                                                                                                      | Histone H1/H5 family                                                                       | Gallus gallus (Chicken) | PF00538;                                 |
| P08288     | 427896;                                                       |                                                          | Histone H1.11R                                                                                                                      | Histone H1/H5 family                                                                       | Gallus gallus (Chicken) | PF00538;                                 |
| P02272     | 426617;                                                       | H2AZ2 H2AF                                               | Histone H2A.V (H2A.F/Z)                                                                                                             | Histone H2A family                                                                         | Gallus gallus (Chicken) | PF00125;PF16211;                         |
| P02263     | 100858459;101749238<br>404299;417955;42788<br>1427881;427895; |                                                          | Histone H2A-IV                                                                                                                      | Histone H2A family                                                                         | Gallus gallus (Chicken) | PF00125;PF16211;                         |
| Q92069     | 100858459;101749238<br>404299;417955;42788<br>1427881;427895; | H2A-VII H2A-VI H2A-VIII                                  | Histone H2A                                                                                                                         | Histone H2A family                                                                         | Gallus gallus (Chicken) | PF00125;PF16211;                         |
| P0C1H3     | 100858607;417956;76<br>9973;770188;770267;                    | H2B-I; H2B-II; H2B-III; H2B-IV; H2B-VI                   | Histone H2B 1/2/3/4/6 (H2B I) (H2B II) (H2B III) (H2B IV) (H2B VI)                                                                  | Histone H2B family                                                                         | Gallus gallus (Chicken) | PF00125;                                 |
| Q9PSW9     | 427886;                                                       | H2B-VIII                                                 | Histone H2B 8 (H2B VIII)                                                                                                            | Histone H2B family                                                                         | Gallus gallus (Chicken) | PF00125;                                 |
| P84229     | 100857439;100858681<br>417953;768333;76980<br>976985;770002;  | H3-I; H3-II; H3-III; H3-IV; H3-V; H3-VI; H3-VII; H3-VIII | Histone H3.2 (Histone H3 class I)                                                                                                   | Histone H3 family                                                                          | Gallus gallus (Chicken) | PF00125;                                 |
| P62801     | 100858049;100858319<br>417946;417950;42788<br>4770005;770142- | H4-I; H4-II; H4-III; H4-IV; H4-V; H4-VI; H4-VII          | Histone H4                                                                                                                          | Histone H4 family                                                                          | Gallus gallus (Chicken) | PF15511;                                 |
| A0A1D5NZ54 | 419701;                                                       | HMBS                                                     | Hydroxymethylbilane synthase (EC 2.5.1.61)                                                                                          | HMBS family                                                                                | Gallus gallus (Chicken) | PF01379;PF03900;                         |
| Q9YH06     | 395724;                                                       | HMGB1 HMG1 RCJMB04_15a21                                 | High mobility group protein B1 (High mobility group protein 1) (HMG-1)                                                              | HMGB family                                                                                | Gallus gallus (Chicken) | PF00505;PF09011;                         |
| P26584     | 396482;                                                       | HMGB2 HMG2                                               | High mobility group protein B2 (High mobility group protein 2) (HMG-2)                                                              | HMGB family                                                                                | Gallus gallus (Chicken) | PF00505;PF09011;                         |
| P40618     | 396232;                                                       | HMGB3 HMG2A HMG4                                         | High mobility group protein B3 (High mobility group protein 2a) (HMG-2a) (High mobility group protein 4) (HMG-4)                    | HMGB family                                                                                | Gallus gallus (Chicken) | PF00505;PF09011;                         |
| E1C5K0     | 420115;                                                       | HOMER3                                                   | WH1 domain-containing protein                                                                                                       | Homer family                                                                               | Gallus gallus (Chicken) | PF00568;                                 |
| Q5F4A4     | 416058;                                                       | IMPDH2 IMPDH RCJMB04_1j11                                | Inosine-5'-monophosphate dehydrogenase (IMP dehydrogenase) (IMPD) (IMPDH) (EC 1.1.1.205)                                            | IMPDH/GMPR family                                                                          | Gallus gallus (Chicken) | PF00571;PF00478;                         |
| Q5ZJA6     | 420842;                                                       | GMPR RCJMB04_19j20                                       | GMP reductase (GMPR) (EC 1.7.1.7) (Guanosine 5'-monophosphate oxidoreductase) (Guanosine monophosphate reductase)                   | IMPDH/GMPR family, GuaC type 1 subfamily                                                   | Gallus gallus (Chicken) | PF00478;                                 |
| C6KIB2     | 418870;                                                       | KPNA3                                                    | Importin alpha 4 (Fragment)                                                                                                         | Importin alpha family                                                                      | Gallus gallus (Chicken) | PF00514;PF16186;PF01749;                 |
| F1NV68     | 418870;                                                       | KPNA3                                                    | Importin subunit alpha                                                                                                              | Importin alpha family                                                                      | Gallus gallus (Chicken) | PF00514;PF16186;PF01749;                 |
| Q5ZLF7     | 425012;                                                       | KPNA4 RCJMB04_6g17                                       | Importin subunit alpha                                                                                                              | Importin alpha family                                                                      | Gallus gallus (Chicken) | PF00514;PF16186;PF01749;                 |
| A0A1D5P1W7 | 426499;                                                       | KPNB1                                                    | Importin N-terminal domain-containing protein                                                                                       | Importin beta family, Importin beta-1 subfamily                                            | Gallus gallus (Chicken) | PF03810;                                 |
| A0A1D5PHE2 | 420199;                                                       | IMPA1                                                    | Inositol-1-monophosphatase (EC 3.1.3.25)                                                                                            | Inositol monophosphatase superfamily                                                       | Gallus gallus (Chicken) | PF00459;                                 |
| A0A1D5P2S9 | 418212;                                                       | ITPR2                                                    | Uncharacterized protein                                                                                                             | InsP3 receptor family                                                                      | Gallus gallus (Chicken) | PF08709;PF00520;PF02815;PF08454;PF01365; |



|            |           |               |                                                                                                                                  |                                                      |                         |                                                  |
|------------|-----------|---------------|----------------------------------------------------------------------------------------------------------------------------------|------------------------------------------------------|-------------------------|--------------------------------------------------|
| A0A3Q3ATV6 | 418212;   | ITPR2         | Uncharacterized protein                                                                                                          | InsP3 receptor family                                | Gallus gallus (Chicken) | PF08709;PF00520;PF02815;PF08454;PF01365;         |
| F1P1X4     | 418212;   | ITPR2         | Uncharacterized protein                                                                                                          | InsP3 receptor family                                | Gallus gallus (Chicken) | PF08709;PF00520;PF02815;PF08454;PF01365;         |
| O42094     | 395951;   |               | Alpha1 integrin                                                                                                                  | Integrin alpha chain family                          | Gallus gallus (Chicken) | PF01839;PF08441;PF00092;                         |
| Q98TT7     | 373946;   |               | Integrin alpha 3A subunit cytoplasmic domain variant                                                                             | Integrin alpha chain family                          | Gallus gallus (Chicken) | PF01839;PF08441;                                 |
| P26007     | 396226;   | ITGA6         | Integrin alpha-6 (VLA-6) [Cleaved into: Integrin alpha-6 heavy chain; Integrin alpha-6 light chain]                              | Integrin alpha chain family                          | Gallus gallus (Chicken) | PF00357;PF08441;PF13517;                         |
| P26009     | 396225;   | ITGA8         | Integrin alpha-8 [Cleaved into: Integrin alpha-8 heavy chain; Integrin alpha-8 light chain]                                      | Integrin alpha chain family                          | Gallus gallus (Chicken) | PF01839;PF00357;PF08441;                         |
| A0A1D5PM20 | 396225;   | ITGA8         | Integrin alpha-8                                                                                                                 | Integrin alpha chain family                          | Gallus gallus (Chicken) | PF01839;PF00357;PF08441;                         |
| Q5ZM22     | 420757;   | RCJMB04_3g3   | Integrin_alpha2 domain-containing protein                                                                                        | Integrin alpha chain family                          | Gallus gallus (Chicken) | PF01839;PF08441;                                 |
| P26008     | 396420;   | ITGAV         | Integrin alpha-V (Vitronectin receptor subunit alpha) [Cleaved into: Integrin alpha-V heavy chain; Integrin alpha-V light chain] | Integrin alpha chain family                          | Gallus gallus (Chicken) | PF01839;PF00357;PF08441;                         |
| F1N8N7     | 374058;   | ITGB1         | Integrin beta                                                                                                                    | Integrin beta chain family                           | Gallus gallus (Chicken) | PF07974;PF18372;PF08725;PF07965;PF00362;PF17205; |
| Q92071     | 374209;   | ITGB3         | Integrin beta                                                                                                                    | Integrin beta chain family                           | Gallus gallus (Chicken) | PF07974;PF18372;PF08725;PF07965;PF00362;PF17205; |
| Q6PVZ5     | 407779;   | KRT5          | Type II alpha-keratin IIA                                                                                                        | Intermediate filament family                         | Gallus gallus (Chicken) | PF00038;PF16208;                                 |
| A0A1D5PXP0 | 408041;   | KRT6A         | IF rod domain-containing protein                                                                                                 | Intermediate filament family                         | Gallus gallus (Chicken) | PF00038;PF16208;                                 |
| O93532     | 395772;   |               | Keratin, type II cytoskeletal cochlear (Cytokeratin otokeratin)                                                                  | Intermediate filament family                         | Gallus gallus (Chicken) | PF00038;PF16208;                                 |
| Q6PVZ1     | 408039;   | KRT14         | Keratin, type I cytoskeletal 14 (Cytokeratin-14) (K14) (Keratin-14) (K14)                                                        | Intermediate filament family                         | Gallus gallus (Chicken) | PF00038;                                         |
| A0A1D5PZ89 | 408039;   | KRT14         | Keratin, type I cytoskeletal 14                                                                                                  | Intermediate filament family                         | Gallus gallus (Chicken) | PF00038;                                         |
| O93256     | 395861;   | KRT19         | Keratin, type I cytoskeletal 19 (Cytokeratin-19) (CK-19) (GK-19) (Keratin-19) (K19)                                              | Intermediate filament family                         | Gallus gallus (Chicken) | PF00038;                                         |
| A0A1L1RWG9 | 395861;   | KRT24         | IF rod domain-containing protein                                                                                                 | Intermediate filament family                         | Gallus gallus (Chicken) | PF00038;                                         |
| A0A1D5PQ92 | 11252929; | LOC11252929   | IF rod domain-containing protein                                                                                                 | Intermediate filament family                         | Gallus gallus (Chicken) | PF00038;PF16208;                                 |
| P13648     | 396224;   | LMNA          | Lamin-A                                                                                                                          | Intermediate filament family                         | Gallus gallus (Chicken) | PF00038;PF00932;                                 |
| P14731     | 396223;   | LMNB1         | Lamin-B1                                                                                                                         | Intermediate filament family                         | Gallus gallus (Chicken) | PF00038;PF00932;                                 |
| P14732     | 396222;   | LMNB2         | Lamin-B2                                                                                                                         | Intermediate filament family                         | Gallus gallus (Chicken) | PF00038;PF00932;                                 |
| O57613     | 395890;   |               | Paranemin                                                                                                                        | Intermediate filament family                         | Gallus gallus (Chicken) | PF00038;                                         |
| F1NJM8     | 395599;   | SYNM          | IF rod domain-containing protein                                                                                                 | Intermediate filament family                         | Gallus gallus (Chicken) | PF00038;                                         |
| Q90662     | 395599;   |               | Synemin                                                                                                                          | Intermediate filament family                         | Gallus gallus (Chicken) | PF00038;                                         |
| F1NJ08     | 420519;   | VIM           | Vimentin                                                                                                                         | Intermediate filament family                         | Gallus gallus (Chicken) | PF00038;PF04732;                                 |
| A0A1D5NX91 | 429422;   | C5H14orf4     | IRF-2BP1_2 domain-containing protein                                                                                             | IRF2BP family                                        | Gallus gallus (Chicken) | PF11261;                                         |
| Q9DDJ1     | 374042;   | MNSOD         | Superoxide dismutase (EC 1.15.1.1)                                                                                               | Iron/manganese superoxide dismutase family           | Gallus gallus (Chicken) | PF02777;PF00081;                                 |
| F1NS88     | 415601;   | ISOC1         | Isochorismatase domain-containing protein                                                                                        | Isochorismatase family                               | Gallus gallus (Chicken) | PF00857;                                         |
| F1NPG2     | 424112;   | IDH1          | Isocitrate dehydrogenase [NADP] (EC 1.1.1.42)                                                                                    | Isocitrate and isopropylmalate dehydrogenases family | Gallus gallus (Chicken) | PF00180;                                         |
| Q5ZL82     | 431056;   | RCJMB04_7e11  | Isocitrate dehydrogenase [NADP] (EC 1.1.1.42)                                                                                    | Isocitrate and isopropylmalate dehydrogenases family | Gallus gallus (Chicken) | PF00180;                                         |
| A0A1L1RX65 | 415362;   | IDH3A         | Isocitrate dehydrogenase [NAD] subunit, mitochondrial                                                                            | Isocitrate and isopropylmalate dehydrogenases family | Gallus gallus (Chicken) | PF00180;                                         |
| Q5Z129     | 415362;   | RCJMB04_31a13 | Isocitrate dehydrogenase [NAD] subunit, mitochondrial                                                                            | Isocitrate and isopropylmalate dehydrogenases family | Gallus gallus (Chicken) | PF00180;                                         |
| B3VE14     | 419110;   | ITIH2         | Inter-alpha inhibitor heavy chain 2                                                                                              | ITIH family                                          | Gallus gallus (Chicken) | PF06668;PF08487;PF00092;                         |

|            |         |                     |                                                                                                                                                              |                                                                            |                         |                                          |
|------------|---------|---------------------|--------------------------------------------------------------------------------------------------------------------------------------------------------------|----------------------------------------------------------------------------|-------------------------|------------------------------------------|
| A0A1D5PET9 | 422095; | SPAG9               | Uncharacterized protein                                                                                                                                      | JIP scaffold family                                                        | Gallus gallus (Chicken) | PF16471;PF09744;                         |
| A0A3S5ZP73 | 416763; |                     | HN1-like protein                                                                                                                                             | JUPITER family                                                             | Gallus gallus (Chicken) | PF17054;                                 |
| E1BSM9     | 418766; | KDELC1              | CAP10 domain-containing protein                                                                                                                              | KDELC family                                                               | Gallus gallus (Chicken) | PF00630;PF05686;                         |
| Q8UVD9     | 374140; | KHSRP FUBP2 ZPB2    | Far upstream element-binding protein 2 (FUSE-binding protein 2) (KH type-splicing regulatory protein) (KSRP) (Zipcode-binding protein 2)                     | KHSRP family                                                               | Gallus gallus (Chicken) | PF09005;PF00013;                         |
| A0A1D5PU09 | 423589; | FERMT2              | PH domain-containing protein                                                                                                                                 | Kindlin family                                                             | Gallus gallus (Chicken) | PF00373;PF18124;PF00169;                 |
| Q90631     | 396335; | KTN1                | Kinectin                                                                                                                                                     | Kinectin family                                                            | Gallus gallus (Chicken) | PF05104;                                 |
| A0A1D5PNZ4 | 423484; | KLC1                | Kinesin light chain                                                                                                                                          | Kinesin light chain family                                                 | Gallus gallus (Chicken) | PF13176;                                 |
| A0A1L1RR51 | 423484; | KLC1                | Kinesin light chain                                                                                                                                          | Kinesin light chain family                                                 | Gallus gallus (Chicken) | PF13176;                                 |
| A0A3Q3AI12 | 769965; | KLC2                | Kinesin light chain                                                                                                                                          | Kinesin light chain family                                                 | Gallus gallus (Chicken) |                                          |
| A0A1D5PYA4 | 424006; | LANCL1              | Uncharacterized protein                                                                                                                                      | LanC-like protein family                                                   | Gallus gallus (Chicken) | PF05147;                                 |
| P00340     | 396221; | LDHA                | L-lactate dehydrogenase A chain (LDH-A) (EC 1.1.1.27)                                                                                                        | LDH/MDH superfamily, LDH family                                            | Gallus gallus (Chicken) | PF02866;PF00056;                         |
| P00337     | 373997; | LDHB                | L-lactate dehydrogenase B chain (LDH-B) (EC 1.1.1.27)                                                                                                        | LDH/MDH superfamily, LDH family                                            | Gallus gallus (Chicken) | PF02866;PF00056;                         |
| Q5ZME2     | 421281; | MDH1 RCJMB04_2g5    | Malate dehydrogenase, cytoplasmic (EC 1.1.1.37) (Cytosolic malate dehydrogenase)                                                                             | LDH/MDH superfamily, MDH type 2 family                                     | Gallus gallus (Chicken) | PF02866;PF00056;                         |
| E1BTT8     | 396221; | LDHA                | L-lactate dehydrogenase (EC 1.1.1.27)                                                                                                                        | LDH/MDH superfamily; LDH/MDH superfamily, LDH family                       | Gallus gallus (Chicken) | PF02866;PF00056;                         |
| A0A1L1RX46 | 417923; | TMPO                | Uncharacterized protein                                                                                                                                      | LEM family                                                                 | Gallus gallus (Chicken) | PF03020;PF08198;                         |
| A0A3Q2UJ35 | 417923; | TMPO                | Uncharacterized protein                                                                                                                                      | LEM family                                                                 | Gallus gallus (Chicken) | PF03020;PF08198;                         |
| Q5ZMN6     | 417923; | RCJMB04_1i19        | Uncharacterized protein                                                                                                                                      | LEM family                                                                 | Gallus gallus (Chicken) | PF03020;PF08198;                         |
| Q90830     | 395992; | CRTAP CASP          | Cartilage-associated protein (Dualin)                                                                                                                        | Leprecan family                                                            | Gallus gallus (Chicken) |                                          |
| Q6JHU8     | 414142; | P3H1 LEPRE1         | Prolyl 3-hydroxylase 1 (EC 1.14.11.7) (Leucine- and proline-enriched proteoglycan 1 homolog) (Leprecan-1 homolog)                                            | Leprecan family                                                            | Gallus gallus (Chicken) | PF13640;                                 |
| F1NGG8     | 418289; | P3H3                | Procollagen-proline 3-dioxygenase (EC 1.14.11.7)                                                                                                             | Leprecan family                                                            | Gallus gallus (Chicken) | PF13640;                                 |
| Q5F425     | 421608; | LIN7C RCJMB04_3i24  | Protein lin-7 homolog C (Lin-7C)                                                                                                                             | Lin-7 family                                                               | Gallus gallus (Chicken) | PF02828;PF00595;                         |
| Q5ZK29     | 429380; | LMF2 RCJMB04_8i13   | Lipase maturation factor 2                                                                                                                                   | Lipase maturation factor family                                            | Gallus gallus (Chicken) | PF06762;                                 |
| A0A1D5P8M7 | 429380; | LMF2                | Lipase maturation factor                                                                                                                                     | Lipase maturation factor family                                            | Gallus gallus (Chicken) | PF06762;                                 |
| A0A3Q2U4S7 | 418219; | PPFIBP1             | Uncharacterized protein                                                                                                                                      | Liprin family, Liprin-beta subfamily                                       | Gallus gallus (Chicken) | PF00536;PF07647;                         |
| Q5F3X7     | 418219; | RCJMB04_4k2         | Uncharacterized protein                                                                                                                                      | Liprin family, Liprin-beta subfamily                                       | Gallus gallus (Chicken) | PF00536;PF07647;                         |
| Q5ZKG5     | 421909; | ACP1 RCJMB04_11a4   | Low molecular weight phosphotyrosine protein phosphatase (LMW-PTP) (LMW-PTPase) (EC 3.1.3.48) (Low molecular weight cytosolic acid phosphatase) (EC 3.1.3.2) | Low molecular weight phosphotyrosine protein phosphatase family            | Gallus gallus (Chicken) | PF01451;                                 |
| A0A1D5P9Z1 | 421909; | ACP1                | Low molecular weight cytosolic acid phosphatase (EC 3.1.3.2) (EC 3.1.3.48) (Low molecular weight phosphotyrosine protein phosphatase)                        | Low molecular weight phosphotyrosine protein phosphatase family            | Gallus gallus (Chicken) | PF01451;                                 |
| P21265     | 396540; | ADSL                | Adenylosuccinate lyase (ADSL) (ASL) (EC 4.3.2.2) (Adenylosuccinase) (ASase)                                                                                  | Lyase 1 family, Adenylosuccinate lyase subfamily                           | Gallus gallus (Chicken) | PF10397;PF00206;                         |
| P05083     | 417545; | ASL2                | Argininosuccinate lyase (ASAL) (EC 4.3.2.1) (Argininosuccinase) (Delta crystallin II) (Delta-2 crystallin)                                                   | Lyase 1 family, Argininosuccinate lyase subfamily                          | Gallus gallus (Chicken) | PF14698;PF00206;                         |
| A0A1L1RT49 | 374226; | MAGOH               | Protein mago nashi homolog                                                                                                                                   | Mago nashi family                                                          | Gallus gallus (Chicken) | PF02792;                                 |
| A0A1D5PB73 | 418565; | CASK                | Uncharacterized protein                                                                                                                                      | MAGUK family                                                               | Gallus gallus (Chicken) | PF00625;PF02828;PF00595;PF00069;PF00018; |
| A0A3Q2ULY1 | 418565; | CASK                | Uncharacterized protein                                                                                                                                      | MAGUK family                                                               | Gallus gallus (Chicken) | PF00625;PF02828;PF00595;PF00069;PF00018; |
| Q5ZLZ6     | 419875; | SLC16A1 RCJMB04_4e8 | Monocarboxylate transporter 1 (Solute carrier family 16 member 1)                                                                                            | Major facilitator superfamily, Monocarboxylate porter (TC 2.A.1.13) family | Gallus gallus (Chicken) | PF07690;                                 |
| F1NVU4     | 417815; | SLC16A7             | Monocarboxylate transporter 2 (Solute carrier family 16 member 7)                                                                                            | Major facilitator superfamily, Monocarboxylate porter (TC 2.A.1.13) family | Gallus gallus (Chicken) | PF07690;                                 |

|            |            |                       |                                                                                                                                                                                                                                 |                                                                                          |                         |                                          |
|------------|------------|-----------------------|---------------------------------------------------------------------------------------------------------------------------------------------------------------------------------------------------------------------------------|------------------------------------------------------------------------------------------|-------------------------|------------------------------------------|
| A0A1D5Q008 | 769765;    | MPI                   | Mannose-6-phosphate isomerase (EC 5.3.1.8)                                                                                                                                                                                      | Mannose-6-phosphate isomerase type 1 family                                              | Gallus gallus (Chicken) | PF01238;                                 |
| B4X9P5     | 418178;    | MGST1                 | Glutathione transferase (EC 2.5.1.18)                                                                                                                                                                                           | MAPEG family                                                                             | Gallus gallus (Chicken) | PF01124;                                 |
| F1NT14     | 418178;    | MGST1                 | Glutathione transferase (EC 2.5.1.18)                                                                                                                                                                                           | MAPEG family                                                                             | Gallus gallus (Chicken) | PF01124;                                 |
| Q5ZLC7     | 419288;    | MAPRE1 RCJMB04_616    | Microtubule-associated protein RP/EB family member 1                                                                                                                                                                            | MAPRE family                                                                             | Gallus gallus (Chicken) | PF00307;PF03271;                         |
| Q5ZKS0     | 770764;    | MARCKSL1 RCJMB04_9h20 | Uncharacterized protein                                                                                                                                                                                                         | MARCKS family                                                                            | Gallus gallus (Chicken) | PF02063;                                 |
| P16527     | 396473;    | MARCKS                | Myristoylated alanine-rich C-kinase substrate (MARCKS)                                                                                                                                                                          | MARCKS family                                                                            | Gallus gallus (Chicken) | PF02063;                                 |
| A0A1D5PDE6 | 396473;    | MARCKS                | Myristoylated alanine-rich C-kinase substrate                                                                                                                                                                                   | MARCKS family                                                                            | Gallus gallus (Chicken) | PF02063;                                 |
| E1C2U4     | 426764;    | MCM4                  | DNA helicase (EC 3.6.4.12)                                                                                                                                                                                                      | MCM family                                                                               | Gallus gallus (Chicken) | PF00493;PF17855;PF14551;PF17207;         |
| Q5ZKR8     | 424295;    | MCM6 RCJMB04_918      | DNA helicase (EC 3.6.4.12)                                                                                                                                                                                                      | MCM family                                                                               | Gallus gallus (Chicken) | PF00493;PF18263;PF17855;PF14551;PF17207; |
| F1NEL0     | 422698;    | MCUB                  | Calcium uniporter regulatory subunit MCUB                                                                                                                                                                                       | MCU (TC 1.A.77) family                                                                   | Gallus gallus (Chicken) | PF04678;                                 |
| R4G140     | 415475;    | MESDC2                | LDLR chaperone MESD (LRP chaperone MESD) (Mesoderm development candidate 2) (Mesoderm development protein)                                                                                                                      | MESD family                                                                              | Gallus gallus (Chicken) | PF10185;                                 |
| F1NS60     | 423842;    | MMS19                 | MMS19 nucleotide excision repair protein                                                                                                                                                                                        | MET18/MMS19 family                                                                       | Gallus gallus (Chicken) | PF12460;PF14500;                         |
| Q5Z123     | 416537;    | HAGH RCJMB04_31d24    | Hydroxyacylglutathione hydrolase, mitochondrial (EC 3.1.2.6) (Glyoxalase II) (Glx II)                                                                                                                                           | Metallo-beta-lactamase superfamily, Glyoxalase II family                                 | Gallus gallus (Chicken) | PF16123;PF00753;                         |
| A0A3Q2U554 | 416537;    | HAGH                  | Hydroxyacylglutathione hydrolase, mitochondrial                                                                                                                                                                                 | Metallo-beta-lactamase superfamily, Glyoxalase II family                                 | Gallus gallus (Chicken) | PF16123;PF00753;                         |
| Q5ZKP6     | 419194;    | ADA RCJMB04_9m8       | Adenosine deaminase (EC 3.5.4.4) (Adenosine aminohydrolase)                                                                                                                                                                     | Metallo-dependent hydrolases superfamily, Adenosine and AMP deaminases family            | Gallus gallus (Chicken) | PF00962;                                 |
| F1NG97     | 423041;    | AMPD3                 | AMP deaminase (EC 3.5.4.6)                                                                                                                                                                                                      | Metallo-dependent hydrolases superfamily, Adenosine and AMP deaminases family            | Gallus gallus (Chicken) | PF00962;                                 |
| Q90635     | 395155;    | DPYSL2                | Dihydropyrimidinase-related protein 2 (DRP-2) (Collapsin response mediator protein CRMP-62)                                                                                                                                     | Metallo-dependent hydrolases superfamily, Hydantoinase/dihydropyrimidinase family        | Gallus gallus (Chicken) | PF01979;                                 |
| Q71SG2     | 395155;    | CRMP2A DPYSL2         | Dihydropyrimidinase-related protein 2                                                                                                                                                                                           | Metallo-dependent hydrolases superfamily, Hydantoinase/dihydropyrimidinase family        | Gallus gallus (Chicken) | PF01979;                                 |
| A0A1D5PZ51 | 395154;    | DPYSL3                | Amidohydro-rel domain-containing protein                                                                                                                                                                                        | Metallo-dependent hydrolases superfamily, Hydantoinase/dihydropyrimidinase family        | Gallus gallus (Chicken) | PF01979;                                 |
| Q71SF8     | 395154;    | CRMP4B                | Collapsin response mediator protein-4B                                                                                                                                                                                          | Metallo-dependent hydrolases superfamily, Hydantoinase/dihydropyrimidinase family        | Gallus gallus (Chicken) | PF01979;                                 |
| E1BWG7     | 420525;    | PTER                  | Parathion hydrolase-related protein (Phosphotriesterase-related protein)                                                                                                                                                        | Metallo-dependent hydrolases superfamily, Phosphotriesterase family                      | Gallus gallus (Chicken) | PF02126;                                 |
| E1BY22     | 422049;    | MUT                   | Methylmalonyl-CoA isomerase (EC 5.4.99.2) (Methylmalonyl-CoA mutase, mitochondrial)                                                                                                                                             | Methylmalonyl-CoA mutase family                                                          | Gallus gallus (Chicken) | PF02310;PF01642;                         |
| Q5F3N1     | 428607;    | PCMT1 RCJMB04_11o11   | Protein-L-isoaspartate(D-aspartate) O-methyltransferase (PIMT) (EC 2.1.1.77) (L-isoaspartyl protein carboxyl methyltransferase) (Protein L-isoaspartyl/D-aspartyl methyltransferase) (Protein-beta-aspartate methyltransferase) | Methyltransferase superfamily, L-isoaspartyl/D-aspartyl protein methyltransferase family | Gallus gallus (Chicken) |                                          |
| A0A3Q3AHD7 | 422912;    | IMMT                  | MICOS complex subunit MIC60 (Mitofilin)                                                                                                                                                                                         | MICOS complex subunit Mic60 family                                                       | Gallus gallus (Chicken) | PF09731;                                 |
| Q5ZM2      | 422912;    | RCJMB04_1p19          | MICOS complex subunit MIC60 (Mitofilin)                                                                                                                                                                                         | MICOS complex subunit Mic60 family                                                       | Gallus gallus (Chicken) | PF09731;                                 |
| Q02960     | 100857237; | MIF                   | Macrophage migration inhibitory factor (MIF) (EC 5.3.2.1) (L-dopachrome isomerase) (L-dopachrome tautomerase) (EC 5.3.3.12) (Phenylpyruvate tautomerase)                                                                        | MIF family                                                                               | Gallus gallus (Chicken) | PF01187;                                 |
| A0A1L1RPT9 | 420526;    | FAM188A               | Ubiquitin carboxyl-terminal hydrolase MINDY (EC 3.4.19.12)                                                                                                                                                                      | MINDY deubiquitinase family, FAM188 subfamily                                            | Gallus gallus (Chicken) | PF13898;                                 |
| F1NWH5     | 426894;    | AQP3                  | Aquaglyceroporin-3 (Aquaporin-3)                                                                                                                                                                                                | MIP/aquaporin (TC 1.A.8) family                                                          | Gallus gallus (Chicken) | PF00230;                                 |
| Q5ZJP2     | 415571;    | RCJMB04_16m9          | FeS_assembly_P domain-containing protein                                                                                                                                                                                        | MIP18 family                                                                             | Gallus gallus (Chicken) | PF01883;                                 |
| Q9PVL6     | 395597;    | Mtch2                 | Mitochondrial carrier homolog 2                                                                                                                                                                                                 | Mitochondrial carrier (TC 2.A.29) family                                                 | Gallus gallus (Chicken) | PF00153;                                 |
| A0A1D5PX68 | 416764;    | SLC25A1               | Uncharacterized protein                                                                                                                                                                                                         | Mitochondrial carrier (TC 2.A.29) family                                                 | Gallus gallus (Chicken) | PF00153;                                 |
| A0A3S5ZPB7 | 417924;    | SLC25A3               | Phosphate carrier protein, mitochondrial (Phosphate transport protein) (Solute carrier family 25 member 3)                                                                                                                      | Mitochondrial carrier (TC 2.A.29) family                                                 | Gallus gallus (Chicken) | PF00153;                                 |
| Q5ZLZ0     | 417924;    | RCJMB04_4e21          | Phosphate carrier protein, mitochondrial (Phosphate transport protein) (Solute carrier family 25 member 3)                                                                                                                      | Mitochondrial carrier (TC 2.A.29) family                                                 | Gallus gallus (Chicken) | PF00153;                                 |
| Q5ZMJ6     | 422546;    | SLC25A4 RCJMB04_1n4   | ADP/ATP translocase (ADP,ATP carrier protein)                                                                                                                                                                                   | Mitochondrial carrier (TC 2.A.29) family                                                 | Gallus gallus (Chicken) | PF00153;                                 |

|            |         |                        |                                                                                                                                                                                                                            |                                                                                                                         |                         |                                  |
|------------|---------|------------------------|----------------------------------------------------------------------------------------------------------------------------------------------------------------------------------------------------------------------------|-------------------------------------------------------------------------------------------------------------------------|-------------------------|----------------------------------|
| A0A1D5PCU1 | 772225; | SLC25A5                | ADP/ATP translocase (ADP,ATP carrier protein)                                                                                                                                                                              | Mitochondrial carrier (TC 2.A.29) family                                                                                | Gallus gallus (Chicken) | PF00153;                         |
| Q5ZLG7     | 374072; | SLC25A6 RCJMB04_6e4    | ADP/ATP translocase (ADP,ATP carrier protein)                                                                                                                                                                              | Mitochondrial carrier (TC 2.A.29) family                                                                                | Gallus gallus (Chicken) | PF00153;                         |
| Q5ZIF4     | 428427; | SLC25A13 RCJMB04_27c17 | Uncharacterized protein                                                                                                                                                                                                    | Mitochondrial carrier (TC 2.A.29) family                                                                                | Gallus gallus (Chicken) | PF00153;                         |
| R4GLG2     | 416062; | SLC25A20               | Uncharacterized protein                                                                                                                                                                                                    | Mitochondrial carrier (TC 2.A.29) family                                                                                | Gallus gallus (Chicken) | PF00153;                         |
| A0A3Q2TTG3 | 424337; | SLC25A24               | Uncharacterized protein                                                                                                                                                                                                    | Mitochondrial carrier (TC 2.A.29) family                                                                                | Gallus gallus (Chicken) | PF13499;PF00153;                 |
| R4GI86     | 424830; | CAB39                  | Uncharacterized protein                                                                                                                                                                                                    | Mo25 family                                                                                                             | Gallus gallus (Chicken) | PF08569;                         |
| F1NWD1     | 419686; | GALE                   | UDP-glucose 4-epimerase (EC 5.1.3.2)                                                                                                                                                                                       | NAD(P)-dependent epimerase/dehydratase family                                                                           | Gallus gallus (Chicken) | PF16363;                         |
| A0A1D5PUF7 | 420292; | TSTA3                  | GDP-4-keto-6-deoxy-D-mannose-3,5-epimerase-4-reductase (EC 1.1.1.271)                                                                                                                                                      | NAD(P)-dependent epimerase/dehydratase family, Fucose synthase subfamily                                                | Gallus gallus (Chicken) | PF01370;                         |
| R4GLI9     | 420886; | NQO2                   | Flavodoxin_2 domain-containing protein                                                                                                                                                                                     | NAD(P)H dehydrogenase (quinone) family                                                                                  | Gallus gallus (Chicken) | PF02525;                         |
| F1P0W8     | 420664; | GPD1L                  | Glycerol-3-phosphate dehydrogenase [NAD(+)] (EC 1.1.1.8)                                                                                                                                                                   | NAD-dependent glycerol-3-phosphate dehydrogenase family                                                                 | Gallus gallus (Chicken) | PF07479;PF01210;                 |
| Q5ZIL4     | 427337; | RCJMB04_25o1           | 15-oxoprostaglandin 13-reductase (EC 1.3.1.48) (EC 1.3.1.74) (Dithiolethione-inducible gene 1 protein) (Leukotriene B4 12-hydroxydehydrogenase) (NAD(P)H-dependent alkenal/one oxidoreductase) (Prostaglandin reductase 1) | NADP-dependent oxidoreductase L4BD family                                                                               | Gallus gallus (Chicken) | PF16884;PF00107;                 |
| F1P2T2     | 417520; | POR                    | NADPH-cytochrome P450 reductase (CPR) (P450R) (EC 1.6.2.4)                                                                                                                                                                 | NADPH-cytochrome P450 reductase family; Flavoprotein pyridine nucleotide cytochrome reductase family; Flavodoxin family | Gallus gallus (Chicken) | PF00667;PF00258;PF00175;         |
| Q58I02     | 417707; | PBEF1 NAMPT1           | Nicotinamide phosphoribosyltransferase (NAMPTase) (EC 2.4.2.12)                                                                                                                                                            | NAPRTase family                                                                                                         | Gallus gallus (Chicken) | PF18127;PF04095;                 |
| O57535     | 395916; |                        | Nucleoside diphosphate kinase (NDK) (NDP kinase) (EC 2.7.4.6)                                                                                                                                                              | NDK family                                                                                                              | Gallus gallus (Chicken) | PF00334;                         |
| P79795     | 395560; | NRP1 NRP               | Neuropilin-1 (A5 protein)                                                                                                                                                                                                  | Neuropilin family                                                                                                       | Gallus gallus (Chicken) | PF00431;PF11980;PF00754;PF00629; |
| F1NZE1     | 771307; | FAM129B                | PH domain-containing protein                                                                                                                                                                                               | Niban family                                                                                                            | Gallus gallus (Chicken) |                                  |
| H9L023     | 426048; | NCLN                   | Nicalin                                                                                                                                                                                                                    | Nicastrin family                                                                                                        | Gallus gallus (Chicken) | PF04389;                         |
| Q5ZJ12     | 417539; | RCJMB04_21m21          | NIPSNAP domain-containing protein                                                                                                                                                                                          | NipSnap family                                                                                                          | Gallus gallus (Chicken) | PF07978;                         |
| Q5ZID0     | 416672; | NMRAL1 RCJMB04_27o15   | NmrA-like family domain-containing protein 1                                                                                                                                                                               | NmrA-type oxidoreductase family                                                                                         | Gallus gallus (Chicken) | PF05368;                         |
| A0A1L1RKT0 | 419966; | NMT1                   | Glycylpeptide N-tetradecanoyltransferase (EC 2.3.1.97)                                                                                                                                                                     | NMT family                                                                                                              | Gallus gallus (Chicken) | PF01233;PF02799;                 |
| A0A3Q2TUU0 | 418755; | NAXD                   | ATP-dependent (S)-NAD(P)H-hydrate dehydratase (EC 4.2.1.93) (ATP-dependent NAD(P)HX dehydratase)                                                                                                                           | NnrD/CARKD family                                                                                                       | Gallus gallus (Chicken) | PF01256;                         |
| F1P2P4     | 418755; | NAXD                   | ATP-dependent (S)-NAD(P)H-hydrate dehydratase (EC 4.2.1.93) (ATP-dependent NAD(P)HX dehydratase)                                                                                                                           | NnrD/CARKD family                                                                                                       | Gallus gallus (Chicken) | PF01256;                         |
| Q5ZLM5     | 422249; | TM9SF2L RCJMB04_5h24   | Transmembrane 9 superfamily member                                                                                                                                                                                         | Nonaspanin (TM9SF) (TC 9.A.2) family                                                                                    | Gallus gallus (Chicken) | PF02990;                         |
| F1NRG5     | 395460; | TM9SF3                 | Transmembrane 9 superfamily member                                                                                                                                                                                         | Nonaspanin (TM9SF) (TC 9.A.2) family                                                                                    | Gallus gallus (Chicken) | PF02990;                         |
| F1NPS0     | 427443; | NUP155                 | Uncharacterized protein                                                                                                                                                                                                    | Non-repetitive/WGA-negative nucleoporin family                                                                          | Gallus gallus (Chicken) | PF03177;PF08801;                 |
| Q5ZMD0     | 426574; | RCJMB04_2i9            | Nop domain-containing protein                                                                                                                                                                                              | NOP5/NOP56 family                                                                                                       | Gallus gallus (Chicken) | PF01798;PF08156;                 |
| E1BUS2     | 424087; | NOP58                  | Nop domain-containing protein                                                                                                                                                                                              | NOP5/NOP56 family                                                                                                       | Gallus gallus (Chicken) | PF01798;PF08156;                 |
| A0A1L1RME9 | 417456; | NPLOC4                 | Uncharacterized protein                                                                                                                                                                                                    | NPL4 family                                                                                                             | Gallus gallus (Chicken) | PF05021;PF11543;PF05020;         |
| Q5ZK10     | 419268; | NSFL1C RCJMB04_13o20   | NSFL1 cofactor p47 (p97 cofactor p47)                                                                                                                                                                                      | NSFL1C family                                                                                                           | Gallus gallus (Chicken) | PF08059;PF00789;                 |
| A0A1D5P2B5 | 417143; | RXRA                   | Uncharacterized protein                                                                                                                                                                                                    | Nuclear hormone receptor family                                                                                         | Gallus gallus (Chicken) | PF00104;PF11825;PF00105;         |
| Q5ZHR1     | 423071; | RCJMB04_34c21          | Uncharacterized protein                                                                                                                                                                                                    | Nucleobindin family                                                                                                     | Gallus gallus (Chicken) | PF13499;                         |
| P16039     | 396203; | NPM1                   | Nucleophosmin (NPM) (Nucleolar phosphoprotein B23) (Nucleolar protein NO38) (Numatrin)                                                                                                                                     | Nucleoplasmin family                                                                                                    | Gallus gallus (Chicken) | PF16276;PF03066;                 |
| A0A1D5PLH4 | 770430; | NPM3                   | Nucleoplasmin domain-containing protein                                                                                                                                                                                    | Nucleoplasmin family                                                                                                    | Gallus gallus (Chicken) | PF03066;                         |
| A0A1D5PFL9 | 415693; | NUP93                  | Nuclear pore complex protein Nup93                                                                                                                                                                                         | Nucleoporin interacting component (NIC) family                                                                          | Gallus gallus (Chicken) | PF04097;                         |

|            |            |                         |                                                                                                                                                                                             |                                                                              |                         |                          |
|------------|------------|-------------------------|---------------------------------------------------------------------------------------------------------------------------------------------------------------------------------------------|------------------------------------------------------------------------------|-------------------------|--------------------------|
| Q5F386     | 415693;    | RCJMB04_28g18           | Nuclear pore complex protein Nup93                                                                                                                                                          | Nucleoporin interacting component (NIC) family                               | Gallus gallus (Chicken) | PF04097;                 |
| Q5ZIU6     | 422120;    | RCJMB04_23h18           | Nuclear pore complex protein Nup85                                                                                                                                                          | Nucleoporin Nup85 family                                                     | Gallus gallus (Chicken) | PF07575;                 |
| E1BZS2     | 417864;    | NAP1L1                  | Uncharacterized protein                                                                                                                                                                     | Nucleosome assembly protein (NAP) family                                     | Gallus gallus (Chicken) | PF00956;                 |
| Q5Zi86     | 423087;    | RCJMB04_29e19           | Uncharacterized protein                                                                                                                                                                     | Nucleosome assembly protein (NAP) family                                     | Gallus gallus (Chicken) | PF00956;                 |
| F2Z4L4     | 417210;    | SET                     | Uncharacterized protein                                                                                                                                                                     | Nucleosome assembly protein (NAP) family                                     | Gallus gallus (Chicken) | PF00956;                 |
| Q5ZIN1     | 419578;    | NUDC RCJMB04_24m10      | Nuclear migration protein nudC (Nuclear distribution protein C homolog)                                                                                                                     | NudC family                                                                  | Gallus gallus (Chicken) | PF04969;PF16273;PF14050; |
| F7BGT1     | 416467;    | NUDT1                   | Nudix hydrolase domain-containing protein                                                                                                                                                   | Nudix hydrolase family                                                       | Gallus gallus (Chicken) | PF00293;                 |
| Q9IAY5     | 395557;    | NUDT16L1 SDOS TIRR      | Tudor-interacting repair regulator protein (NUDT16-like protein 1) (Protein syndesmos)                                                                                                      | Nudix hydrolase family, TIRR subfamily                                       | Gallus gallus (Chicken) |                          |
| E1BV83     | 417935;    | NUP205                  | Uncharacterized protein                                                                                                                                                                     | NUP186/NUP192/NUP205 family                                                  | Gallus gallus (Chicken) | PF11894;                 |
| Q5ZMR2     | 424256;    | RCJMB04_1g10            | OMPdecase (EC 2.4.2.10) (EC 4.1.1.23) (Orotate phosphoribosyltransferase) (Orotidine 5'-phosphate decarboxylase) (Uridine 5'-monophosphate synthase)                                        | OMP decarboxylase family, Purine/pyrimidine phosphoribosyltransferase family | Gallus gallus (Chicken) | PF00215;PF00156;         |
| Q5ZK09     | 427034;    | HIKESHI RCJMB04_13p7    | Protein Hikeshi                                                                                                                                                                             | OPI10 family                                                                 | Gallus gallus (Chicken) | PF05603;                 |
| A0A1D5PGC8 | 417866;    | OSBPL8                  | Oxysterol-binding protein                                                                                                                                                                   | OSBP family                                                                  | Gallus gallus (Chicken) | PF01237;PF00169;         |
| A0A3Q3AQG0 | 417866;    | OSBPL8                  | Oxysterol-binding protein                                                                                                                                                                   | OSBP family                                                                  | Gallus gallus (Chicken) | PF01237;PF00169;         |
| Q90955     | 100859133; | PTGES3 TEBP             | Prostaglandin E synthase 3 (EC 5.3.99.3) (Cytosolic prostaglandin E2 synthase) (cPGES) (Hsp90 co-chaperone) (Progesterone receptor complex p23) (Telomerase-binding protein p23) (Fragment) | P23/wos2 family                                                              | Gallus gallus (Chicken) | PF04969;                 |
| A0A1D5P4R2 | 423704;    | P4HA1                   | Procollagen-proline 4-dioxygenase (EC 1.14.11.2)                                                                                                                                            | P4HA family                                                                  | Gallus gallus (Chicken) | PF13640;PF08336;         |
| E1BY52     | 423704;    | P4HA1                   | Procollagen-proline 4-dioxygenase (EC 1.14.11.2)                                                                                                                                            | P4HA family                                                                  | Gallus gallus (Chicken) | PF13640;PF08336;         |
| O13154     | 395975;    | PACSIN2                 | Protein kinase C and casein kinase substrate in neurons protein 2 (Focal adhesion protein of 52 kDa) (FAP52)                                                                                | PACSIN family                                                                | Gallus gallus (Chicken) | PF00611;PF14604;         |
| Q8JHZ8     | 373898;    | PALD1 PALD RCJMB04_11g7 | Paladin                                                                                                                                                                                     | Paladin family                                                               | Gallus gallus (Chicken) |                          |
| Q5ZJT3     | 419681;    | RCJMB04_15c4            | Palmitoyl-protein hydrolase 1 (EC 3.1.2.22) (Palmitoyl-protein thioesterase 1)                                                                                                              | Palmitoyl-protein thioesterase family                                        | Gallus gallus (Chicken) |                          |
| P30374     | 423668;    |                         | Ribonuclease homolog (EC 3.1.27.-) (RSFR)                                                                                                                                                   | Pancreatic ribonuclease family                                               | Gallus gallus (Chicken) | PF00074;                 |
| Q27J90     | 423668;    |                         | Leukocyte ribonuclease A-2                                                                                                                                                                  | Pancreatic ribonuclease family                                               | Gallus gallus (Chicken) | PF00074;                 |
| F1NCU9     | 395830;    | PON1                    | Paraoxonase (EC 3.1.1.2)                                                                                                                                                                    | Paraoxonase family                                                           | Gallus gallus (Chicken) | PF01731;                 |
| Q9DEA3     | 373984;    | PCNA                    | Proliferating cell nuclear antigen (PCNA)                                                                                                                                                   | PCNA family                                                                  | Gallus gallus (Chicken) | PF02747;PF00705;         |
| Q98TX3     | 374191;    | PDCD4                   | Programmed cell death protein 4 (Protein I11/6)                                                                                                                                             | PDCD4 family                                                                 | Gallus gallus (Chicken) | PF02847;                 |
| F1NIY3     | 374191;    | PDCD4                   | Programmed cell death protein 4                                                                                                                                                             | PDCD4 family                                                                 | Gallus gallus (Chicken) | PF02847;                 |
| A0A1D5P2A3 | 424932;    | PDE6D                   | Retinal rod rhodopsin-sensitive cGMP 3',5'-cyclic phosphodiesterase subunit delta                                                                                                           | PDE6D/unc-119 family                                                         | Gallus gallus (Chicken) | PF05351;                 |
| Q05744     | 396090;    | CTSD                    | Cathepsin D (EC 3.4.23.5) [Cleaved into: Cathepsin D light chain; Cathepsin D heavy chain]                                                                                                  | Peptidase A1 family                                                          | Gallus gallus (Chicken) | PF00026;                 |
| E1C897     | 417848;    | CTSEAL                  | CathepsinE-A-like protein                                                                                                                                                                   | Peptidase A1 family                                                          | Gallus gallus (Chicken) | PF07966;PF00026;         |
| P87362     | 395996;    | BLMH                    | Bleomycin hydrolase (BH) (BLM hydrolase) (BMH) (EC 3.4.22.40) (Aminopeptidase H)                                                                                                            | Peptidase C1 family                                                          | Gallus gallus (Chicken) | PF03051;                 |
| E1C4M3     | 419311;    | CTSZ                    | Cathepsin X (EC 3.4.18.1)                                                                                                                                                                   | Peptidase C1 family                                                          | Gallus gallus (Chicken) | PF00112;                 |
| A1IMF0     | 770302;    | UCH-L1 UCHL1            | Ubiquitin carboxyl-terminal hydrolase (EC 3.4.19.12)                                                                                                                                        | Peptidase C12 family                                                         | Gallus gallus (Chicken) | PF01088;                 |
| Q9PW67     | 395626;    | UCH-6                   | Ubiquitin carboxyl-terminal hydrolase (EC 3.4.19.12)                                                                                                                                        | Peptidase C12 family                                                         | Gallus gallus (Chicken) | PF01088;                 |
| Q5ZKF1     | 424359;    | RCJMB04_11d7            | Ubiquitin carboxyl-terminal hydrolase (EC 3.4.19.12)                                                                                                                                        | Peptidase C12 family                                                         | Gallus gallus (Chicken) | PF01088;PF18031;         |
| E1C958     | 423418;    | LGMN                    | Asparaginyl endopeptidase (EC 3.4.22.34) (Legumain) (Protease, cysteine 1)                                                                                                                  | Peptidase C13 family                                                         | Gallus gallus (Chicken) | PF01650;                 |

|            |           |                      |                                                                                                                                                                                                                 |                                                                                                                           |                         |                                  |
|------------|-----------|----------------------|-----------------------------------------------------------------------------------------------------------------------------------------------------------------------------------------------------------------|---------------------------------------------------------------------------------------------------------------------------|-------------------------|----------------------------------|
| O93417     | 395476;   | CASP3                | Caspase-3                                                                                                                                                                                                       | Peptidase C14A family                                                                                                     | Gallus gallus (Chicken) |                                  |
| E1C8W4     | 418290;   | USP5                 | Ubiquitin carboxyl-terminal hydrolase (EC 3.4.19.12)                                                                                                                                                            | Peptidase C19 family                                                                                                      | Gallus gallus (Chicken) | PF00627;PF00443;PF02148;PF17807; |
| Q6U711     | 395126;   | USP7                 | Ubiquitin carboxyl-terminal hydrolase 7 (EC 3.4.19.12) (Deubiquitinating enzyme 7) (Ubiquitin thioesterase 7) (Ubiquitin-specific-processing protease 7)                                                        | Peptidase C19 family                                                                                                      | Gallus gallus (Chicken) | PF00917;PF00443;PF14533;PF12436; |
| A0A1D5PPD3 | 395126;   | USP7                 | Ubiquitin carboxyl-terminal hydrolase 7 (EC 3.4.19.12) (Ubiquitin thioesterase 7) (Ubiquitin-specific-processing protease 7)                                                                                    | Peptidase C19 family                                                                                                      | Gallus gallus (Chicken) | PF00917;PF00443;PF14533;PF12436; |
| E1BWJ5     | 418569;   | USP9Y                | Ubiquitinyl hydrolase 1 (EC 3.4.19.12)                                                                                                                                                                          | Peptidase C19 family                                                                                                      | Gallus gallus (Chicken) | PF12030;PF00443;                 |
| Q5ZJN4     | 415817;   | USP10 RCJMB04_16o18  | Ubiquitin carboxyl-terminal hydrolase 10 (EC 3.4.19.12) (Deubiquitinating enzyme 10) (Ubiquitin thioesterase 10) (Ubiquitin-specific-processing protease 10)                                                    | Peptidase C19 family, USP10 subfamily                                                                                     | Gallus gallus (Chicken) | PF07145;PF00443;                 |
| O42133     | 693249;   |                      | Calcium-activated neutral proteinase 1 (EC 3.4.22.52) (Calpain mu-type) (Calpain-1 catalytic subunit) (Calpain-1 large subunit) (Micromolar-calpain)                                                            | Peptidase C2 family                                                                                                       | Gallus gallus (Chicken) | PF01067;PF13833;PF00648;         |
| P00789     | 396240;   |                      | Calpain-1 catalytic subunit (EC 3.4.22.52) (Calcium-activated neutral proteinase) (CANP) (Calpain-1 large subunit) (Mu/M-type)                                                                                  | Peptidase C2 family                                                                                                       | Gallus gallus (Chicken) | PF01067;PF00648;                 |
| Q8UW59     | 395277;   | PARK7                | Protein/nucleic acid deglycase DJ-1 (EC 3.1.2.-) (EC 3.5.1.-) (EC 3.5.1.124) (Maillard deglycase) (Parkinson disease protein 7 homolog) (Parkinsonism-associated deglycase) (Protein DJ-1) (DJ-1)               | Peptidase C56 family                                                                                                      | Gallus gallus (Chicken) | PF01965;                         |
| D5M8S2     | 395277;   | DJ-1 PARK7           | Maillard deglycase (EC 3.5.1.124) (Parkinsonism-associated deglycase) (Protein/nucleic acid deglycase DJ-1)                                                                                                     | Peptidase C56 family                                                                                                      | Gallus gallus (Chicken) | PF01965;                         |
| A0A1D5NTA0 | 777320;   | OTUB1                | Ubiquitin thioesterase (EC 3.4.19.12)                                                                                                                                                                           | Peptidase C65 family                                                                                                      | Gallus gallus (Chicken) | PF10275;                         |
| Q5ZIF3     | 422542;   | UFSP2 RCJMB04_27c22  | Ufm1-specific protease 2 (UFSP2) (EC 3.4.22.-)                                                                                                                                                                  | Peptidase C78 family                                                                                                      | Gallus gallus (Chicken) | PF07910;                         |
| O57579     | 395667;   | ANPEP APDE           | Aminopeptidase Ey (EC 3.4.11.20) (Aminopeptidase N)                                                                                                                                                             | Peptidase M1 family                                                                                                       | Gallus gallus (Chicken) | PF11838;PF01433;                 |
| A0A1L1RVF4 | 427122;   | ERAP1                | Aminopeptidase (EC 3.4.11.-)                                                                                                                                                                                    | Peptidase M1 family                                                                                                       | Gallus gallus (Chicken) | PF11838;PF01433;                 |
| Q5ZJ6      | 417918;   | RCJMB04_17k12        | Leukotriene A(4) hydrolase (LTA-4 hydrolase) (EC 3.3.2.6)                                                                                                                                                       | Peptidase M1 family                                                                                                       | Gallus gallus (Chicken) | PF09127;PF01433;                 |
| Q90611     | 386583;   | MMP2                 | 72 kDa type IV collagenase (EC 3.4.24.24) (72 kDa gelatinase) (Gelatinase A) (Matrix metalloproteinase-2) (MMP-2)                                                                                               | Peptidase M10A family                                                                                                     | Gallus gallus (Chicken) | PF00040;PF00045;PF00413;PF01471; |
| E1BYS4     | 417590;   | CPD                  | Carboxypeptidase D (EC 3.4.17.22) (Metallo-carboxypeptidase D)                                                                                                                                                  | Peptidase M14 family                                                                                                      | Gallus gallus (Chicken) | PF00246;                         |
| E1C041     | 417843;   | CPM                  | Peptidase_M14 domain-containing protein                                                                                                                                                                         | Peptidase M14 family                                                                                                      | Gallus gallus (Chicken) | PF00246;                         |
| Q5ZJ49     | 417134;   | PMPCA RCJMB04_20I2   | Alpha-MPP (inactive zinc metalloprotease alpha) (Mitochondrial-processing peptidase subunit alpha)                                                                                                              | Peptidase M16 family                                                                                                      | Gallus gallus (Chicken) | PF00675;PF05193;                 |
| E1C9F5     | 420462;   | PITRM1               | Pitriysin metalloproteinase 1 (Presequence protease, mitochondrial)                                                                                                                                             | Peptidase M16 family, PreP subfamily                                                                                      | Gallus gallus (Chicken) | PF08367;PF05193;                 |
| F1NSZ4     | 419314;   | NPEPL1               | CYTOSOL_AP domain-containing protein                                                                                                                                                                            | Peptidase M17 family                                                                                                      | Gallus gallus (Chicken) | PF18295;PF00883;                 |
| Q5ZJU9     | 425306;   | RCJMB04_15I13        | Cysteinyglycine-S-conjugate dipeptidase (EC 3.4.11.1) (EC 3.4.11.5) (EC 3.4.13.23) (Cytosol aminopeptidase) (Leucine aminopeptidase 3) (Leucyl aminopeptidase) (Proline aminopeptidase) (Prolyl aminopeptidase) | Peptidase M17 family                                                                                                      | Gallus gallus (Chicken) | PF00883;PF02789;                 |
| Q5ZJ47     | 424200;   | RCJMB04_20m7         | Aspartyl aminopeptidase (EC 3.4.11.21)                                                                                                                                                                          | Peptidase M18 family                                                                                                      | Gallus gallus (Chicken) | PF02127;                         |
| A0A1D5PAU7 | 10085836; | ACY1                 | N-acyl-L-amino-acid amidohydrolase (EC 3.5.1.14)                                                                                                                                                                | Peptidase M20A family                                                                                                     | Gallus gallus (Chicken) | PF07687;PF01546;                 |
| Q5ZLV5     | 421013;   | RCJMB04_4I9          | M20_dimer domain-containing protein                                                                                                                                                                             | Peptidase M20A family                                                                                                     | Gallus gallus (Chicken) | PF07687;PF01546;                 |
| Q5ZL18     | 419838;   | PM20D1 RCJMB04_8d17  | N-fatty-acyl-amino acid synthase/hydrolase PM20D1 (EC 3.5.1.114) (EC 3.5.1.14) (Peptidase M20 domain-containing protein 1)                                                                                      | Peptidase M20A family                                                                                                     | Gallus gallus (Chicken) | PF07687;PF01546;                 |
| A0A1D5P7C6 | 425279;   | PA2G4                | Peptidase_M24 domain-containing protein                                                                                                                                                                         | Peptidase M24 family                                                                                                      | Gallus gallus (Chicken) | PF00557;                         |
| Q5ZIL5     | 417912;   | METAP2 RCJMB04_25d21 | Methionine aminopeptidase 2 (MAP 2) (MetAP 2) (EC 3.4.11.18) (Initiation factor 2-associated 67 kDa glycoprotein) (Peptidase M) (p67) (p67eF2)                                                                  | Peptidase M24 family; Peptidase M24A family; Peptidase M24A family, Methionine aminopeptidase eukaryotic type 2 subfamily | Gallus gallus (Chicken) | PF00557;                         |
| Q5ZKL3     | 415776;   | RCJMB04_10d1         | AMP_N domain-containing protein                                                                                                                                                                                 | Peptidase M24B family                                                                                                     | Gallus gallus (Chicken) | PF05195;PF00557;                 |
| F1POA1     | 423886;   | XPNPEP1              | Uncharacterized protein                                                                                                                                                                                         | Peptidase M24B family                                                                                                     | Gallus gallus (Chicken) | PF01321;PF00557;PF16188;         |
| Q90997     | 396191;   | TFRC                 | Transferrin receptor protein 1 (TR) (TfR) (TfR1) (TfR)                                                                                                                                                          | Peptidase M28 family, M28B subfamily                                                                                      | Gallus gallus (Chicken) | PF02225;PF04389;PF04253;         |
| E1C0D8     | 427167;   | NLN                  | Peptidase_M3 domain-containing protein                                                                                                                                                                          | Peptidase M3 family                                                                                                       | Gallus gallus (Chicken) | PF01432;                         |
| A0A1D5PIZ1 | 426398;   | THOP1                | Peptidase_M3 domain-containing protein                                                                                                                                                                          | Peptidase M3 family                                                                                                       | Gallus gallus (Chicken) | PF01432;                         |
| F1NR71     | 415869;   | PSMD7                | MPN domain-containing protein                                                                                                                                                                                   | Peptidase M67A family                                                                                                     | Gallus gallus (Chicken) | PF01398;PF13012;                 |

|            |            |                                   |                                                                                                                                                                                                                                                                                                                                                  |                                                                    |                         |                                  |
|------------|------------|-----------------------------------|--------------------------------------------------------------------------------------------------------------------------------------------------------------------------------------------------------------------------------------------------------------------------------------------------------------------------------------------------|--------------------------------------------------------------------|-------------------------|----------------------------------|
| E1C8A6     | 422201;    | BRCC3                             | Lys-63-specific deubiquitinase (EC 3.4.19.-)                                                                                                                                                                                                                                                                                                     | Peptidase M67A family, BRCC36 subfamily                            | Gallus gallus (Chicken) | PF18110;PF01398;                 |
| Q5ZLC3     | 426579;    | RCJMB04_6i21                      | MPN domain-containing protein                                                                                                                                                                                                                                                                                                                    | Peptidase M67A family, CSN5 subfamily                              | Gallus gallus (Chicken) | PF18323;PF01398;                 |
| Q90865     | 396135;    | HGF1 MSP                          | Hepatocyte growth factor-like/macrophage stimulating protein                                                                                                                                                                                                                                                                                     | Peptidase S1 family, Plasminogen subfamily                         | Gallus gallus (Chicken) | PF00051;PF00024;PF00089;         |
| F1NWX6     | 421580;    | PLG                               | Plasminogen (EC 3.4.21.7)                                                                                                                                                                                                                                                                                                                        | Peptidase S1 family, Plasminogen subfamily                         | Gallus gallus (Chicken) | PF00051;PF00024;PF00089;         |
| A0A1L1RKJ5 | 428163;    | CTSA                              | Carboxypeptidase (EC 3.4.16.-)                                                                                                                                                                                                                                                                                                                   | Peptidase S10 family                                               | Gallus gallus (Chicken) | PF00450;                         |
| Q5ZJ5      | 428163;    | RCJMB04_25i7                      | Carboxypeptidase (EC 3.4.16.-)                                                                                                                                                                                                                                                                                                                   | Peptidase S10 family                                               | Gallus gallus (Chicken) | PF00450;                         |
| Q5F3W4     | 417403;    | SCPEP1 RCJMB04_5g1                | Carboxypeptidase (EC 3.4.16.-)                                                                                                                                                                                                                                                                                                                   | Peptidase S10 family                                               | Gallus gallus (Chicken) | PF00450;                         |
| A0A1D5NYJ2 | 768942;    | LONP1                             | Lon protease homolog, mitochondrial (EC 3.4.21.53)                                                                                                                                                                                                                                                                                               | Peptidase S16 family                                               | Gallus gallus (Chicken) | PF00004;PF05362;PF02190;         |
| A0A1D5PRA3 | 426850;    | SEC11C                            | Signal peptidase complex catalytic subunit SEC11 (EC 3.4.21.89)                                                                                                                                                                                                                                                                                  | Peptidase S26B family                                              | Gallus gallus (Chicken) | PF00717;                         |
| A0A1D5PVG8 | 428096;    | PRCP                              | Uncharacterized protein                                                                                                                                                                                                                                                                                                                          | Peptidase S28 family                                               | Gallus gallus (Chicken) | PF05577;                         |
| E1C7F4     | 421447;    | EPHX1L                            | Epoxide hydratase (EC 3.3.2.9) (Epoxide hydrolase 1) (Microsomal epoxide hydrolase)                                                                                                                                                                                                                                                              | Peptidase S33 family                                               | Gallus gallus (Chicken) | PF06441;                         |
| Q5ZM7      | 421785;    | RCJMB04_1o16                      | Prolyl endopeptidase (EC 3.4.21.-)                                                                                                                                                                                                                                                                                                               | Peptidase S9A family                                               | Gallus gallus (Chicken) | PF00326;PF02897;                 |
| A0A1D5PJA5 | 424187;    | DPP4                              | Dipeptidyl peptidase 4 (EC 3.4.14.5) (Dipeptidyl peptidase 4 membrane form) (Dipeptidyl peptidase 4 soluble form) (Dipeptidyl peptidase IV) (Dipeptidyl peptidase IV membrane form) (Dipeptidyl peptidase IV soluble form) (T-cell activation antigen CD26)                                                                                      | Peptidase S9B family, DPPIV subfamily                              | Gallus gallus (Chicken) | PF00930;PF18811;PF00326;         |
| O42265     | 395874;    | PSMA1                             | Proteasome subunit alpha type-1 (Macropain subunit C2) (Multicatalytic endopeptidase complex subunit C2) (Proteasome component C2)                                                                                                                                                                                                               | Peptidase T1A family                                               | Gallus gallus (Chicken) | PF00227;PF10584;                 |
| A0A1D5PHL0 | 420772;    | PSMA2                             | Proteasome subunit alpha type                                                                                                                                                                                                                                                                                                                    | Peptidase T1A family                                               | Gallus gallus (Chicken) | PF00227;PF10584;                 |
| Q5ZLI2     | 423542;    | PSMA3 RCJMB04_6b22                | Proteasome subunit alpha type                                                                                                                                                                                                                                                                                                                    | Peptidase T1A family                                               | Gallus gallus (Chicken) | PF00227;PF10584;                 |
| F1NC02     | 415357;    | PSMA4                             | Proteasome subunit alpha type                                                                                                                                                                                                                                                                                                                    | Peptidase T1A family                                               | Gallus gallus (Chicken) | PF00227;PF10584;                 |
| Q5ZJX9     | 426937;    | PSMA5 RCJMB04_14i9                | Proteasome subunit alpha type                                                                                                                                                                                                                                                                                                                    | Peptidase T1A family                                               | Gallus gallus (Chicken) | PF00227;PF10584;                 |
| F1NEQ6     | 423326;    | PSMA6                             | Proteasome subunit alpha type                                                                                                                                                                                                                                                                                                                    | Peptidase T1A family                                               | Gallus gallus (Chicken) | PF00227;PF10584;                 |
| O13268     | 395318;    | PSMA7                             | Proteasome subunit alpha type-7 (GPRO-28)                                                                                                                                                                                                                                                                                                        | Peptidase T1A family                                               | Gallus gallus (Chicken) | PF00227;PF10584;                 |
| Q6JLB2     | 421551;    | PSMB1                             | Proteasome subunit beta                                                                                                                                                                                                                                                                                                                          | Peptidase T1B family                                               | Gallus gallus (Chicken) | PF00227;                         |
| R4GLB3     | 419630;    | PSMB2                             | Proteasome subunit beta                                                                                                                                                                                                                                                                                                                          | Peptidase T1B family                                               | Gallus gallus (Chicken) | PF00227;                         |
| E1BYW9     | 419997;    | PSMB3                             | Proteasome subunit beta                                                                                                                                                                                                                                                                                                                          | Peptidase T1B family                                               | Gallus gallus (Chicken) | PF00227;                         |
| H9LOU6     | 429986;    | PSMB4                             | Proteasome subunit beta                                                                                                                                                                                                                                                                                                                          | Peptidase T1B family                                               | Gallus gallus (Chicken) | PF00227;                         |
| P34065     | 396003;    | PSMB5                             | Proteasome subunit beta type-5 (EC 3.4.25.1) (Macropain chain 1) (Multicatalytic endopeptidase complex chain 1) (Proteasome chain 1) (Proteasome subunit C1) (Fragment)                                                                                                                                                                          | Peptidase T1B family                                               | Gallus gallus (Chicken) | PF00227;                         |
| Q7ZT63     | 378915;    | psmb7 PSMB7                       | Proteasome subunit beta                                                                                                                                                                                                                                                                                                                          | Peptidase T1B family                                               | Gallus gallus (Chicken) | PF12465;PF00227;                 |
| E1BW27     | 422779;    | TMEM33                            | Uncharacterized protein                                                                                                                                                                                                                                                                                                                          | PER33/POM33 family                                                 | Gallus gallus (Chicken) | PF03661;                         |
| A0A1D5P6V5 | 100857433; | PLIN4                             | Perilipin                                                                                                                                                                                                                                                                                                                                        | Perilipin family                                                   | Gallus gallus (Chicken) | PF03036;                         |
| P0CB50     | 424598;    | PRDX1                             | Peroxiredoxin-1 (EC 1.11.1.24) (Thioredoxin-dependent peroxiredoxin 1)                                                                                                                                                                                                                                                                           | Peroxiredoxin family, AhpC/Prx1 subfamily                          | Gallus gallus (Chicken) | PF10417;PF00578;                 |
| Q5ZJF4     | 429062;    | PRDX6 RCJMB04_18k11               | Peroxiredoxin-6 (EC 1.11.1.27) (1-Cys peroxiredoxin) (1-Cys PRX) (Acidic calcium-independent phospholipase A2) (aiPLA2) (EC 3.1.1.4) (Glutathione-dependent peroxiredoxin) (Lysophosphatidylcholine acyltransferase 5) (LPC acyltransferase 5) (LPCAT-5) (Lyso-PC acyltransferase 5) (EC 2.3.1.23) (Non-selenium glutathione peroxidase) (NSGPx) | Peroxiredoxin family, Prx6 subfamily                               | Gallus gallus (Chicken) | PF10417;PF00578;                 |
| Q5Z134     | 423625;    | PRXL2A FAM213A PAMM RCJMB04_30m16 | Peroxiredoxin-like 2A (Peroxiredoxin-like 2 activated in M-CSF stimulated monocytes) (Protein PAMM) (Redox-regulatory protein FAM213A)                                                                                                                                                                                                           | Peroxiredoxin-like PRXL2 family, PRXL2A subfamily                  | Gallus gallus (Chicken) | PF13911;                         |
| A0A0F6YFH3 | 423625;    |                                   | Peroxiredoxin-like 2 activated in M-CSF stimulated monocytes (Peroxiredoxin-like 2A) (Redox-regulatory protein FAM213A)                                                                                                                                                                                                                          | Peroxiredoxin-like PRXL2 family, PRXL2A subfamily                  | Gallus gallus (Chicken) | PF13911;                         |
| Q5ZJ61     | 424812;    | FARSB RCJMB04_20i16               | Phenylalanyl-tRNA synthetase beta subunit (EC 6.1.1.20)                                                                                                                                                                                                                                                                                          | Phenylalanyl-tRNA synthetase beta subunit family, Type 2 subfamily | Gallus gallus (Chicken) | PF03483;PF03484;PF18262;PF17759; |
| F1NBJ2     | 419523;    | PPP2R2A                           | Serine/threonine-protein phosphatase 2A 55 kDa regulatory subunit B                                                                                                                                                                                                                                                                              | Phosphatase 2A regulatory subunit B family                         | Gallus gallus (Chicken) |                                  |

|            |         |                        |                                                                                                                                      |                                                                              |                         |                                                  |
|------------|---------|------------------------|--------------------------------------------------------------------------------------------------------------------------------------|------------------------------------------------------------------------------|-------------------------|--------------------------------------------------|
| Q5ZLP4     | 419523; | PPP2R2A RCJMB04_5f2    | Serine/threonine-protein phosphatase 2A 55 kDa regulatory subunit B                                                                  | Phosphatase 2A regulatory subunit B family                                   | Gallus gallus (Chicken) |                                                  |
| P51903     | 395833; | PGK                    | Phosphoglycerate kinase (EC 2.7.2.3)                                                                                                 | Phosphoglycerate kinase family                                               | Gallus gallus (Chicken) | PF00162;                                         |
| Q5ZHV4     | 418172; | BPGM RCJMB04_32o10     | Phosphoglycerate mutase (EC 5.4.2.11) (EC 5.4.2.4)                                                                                   | Phosphoglycerate mutase family, BPG-dependent PGAM subfamily                 | Gallus gallus (Chicken) | PF00300;                                         |
| Q5ZLN1     | 428969; | PGAM1 RCJMB04_5g20     | Phosphoglycerate mutase 1 (EC 5.4.2.11) (EC 5.4.2.4) (BPG-dependent PGAM 1)                                                          | Phosphoglycerate mutase family, BPG-dependent PGAM subfamily                 | Gallus gallus (Chicken) | PF00300;                                         |
| F1NN63     | 424691; | PGM1                   | Uncharacterized protein                                                                                                              | Phosphohexose mutase family                                                  | Gallus gallus (Chicken) | PF02878;PF02879;PF02880;PF00408;                 |
| Q2UZR2     | 424691; |                        | Phosphoglucomutase 1                                                                                                                 | Phosphohexose mutase family                                                  | Gallus gallus (Chicken) | PF02878;PF02879;PF02880;PF00408;                 |
| Q5ZHU2     | 426435; | RCJMB04_33e1           | Uncharacterized protein                                                                                                              | Phosphohexose mutase family                                                  | Gallus gallus (Chicken) | PF02878;PF02879;PF02880;PF00408;                 |
| F1NAA5     | 419052; | PGM2L1                 | Uncharacterized protein                                                                                                              | Phosphohexose mutase family                                                  | Gallus gallus (Chicken) | PF02878;PF02879;PF02880;PF00408;                 |
| E1BQU2     | 421841; | PGM3                   | Phosphoacetylglucosamine mutase (PAGM) (EC 5.4.2.3) (Acetylglucosamine phosphomutase) (N-acetylglucosamine-phosphate mutase)         | Phosphohexose mutase family                                                  | Gallus gallus (Chicken) | PF02878;PF00408;                                 |
| F1NM36     | 427215; | PGM5                   | Uncharacterized protein                                                                                                              | Phosphohexose mutase family                                                  | Gallus gallus (Chicken) | PF02878;PF02879;PF02880;                         |
| A0A1D5P8X9 | 428635; | SNAP91                 | ENTH domain-containing protein                                                                                                       | PICALM/SNAP91 family                                                         | Gallus gallus (Chicken) | PF07651;                                         |
| Q5ZLX6     | 428635; | RCJMB04_4i4            | ENTH domain-containing protein                                                                                                       | PICALM/SNAP91 family                                                         | Gallus gallus (Chicken) | PF07651;                                         |
| F1N804     | 416030; | PLXNA1                 | Sema domain-containing protein                                                                                                       | Plexin family                                                                | Gallus gallus (Chicken) | PF08337;PF01437;PF01403;PF01833;PF18020;PF17960; |
| F1NCV7     | 431261; | MTAP                   | S-methyl-5'-thioadenosine phosphorylase (EC 2.4.2.28) (5'-methylthioadenosine phosphorylase) (MTA phosphorylase) (MTAP) (MTAPase)    | PNP/MTAP phosphorylase family; PNP/MTAP phosphorylase family, MTAP subfamily | Gallus gallus (Chicken) | PF01048;                                         |
| Q5ZHQ7     | 431261; | MTAP RCJMB04_34g8      | S-methyl-5'-thioadenosine phosphorylase (EC 2.4.2.28) (5'-methylthioadenosine phosphorylase) (MTA phosphorylase) (MTAP) (MTAPase)    | PNP/MTAP phosphorylase family; PNP/MTAP phosphorylase family, MTAP subfamily | Gallus gallus (Chicken) | PF01048;                                         |
| Q57604     | 395755; | PODXL MEP21 PCLP PCLP1 | Podocalyxin (Podocalyxin-like protein 1) (PC) (PCLP-1) (Thrombospondin)                                                              | Podocalyxin family                                                           | Gallus gallus (Chicken) | PF06365;                                         |
| A0A3Q2UBE7 | 395755; | PODXL                  | Podocalyxin (Podocalyxin-like protein 1)                                                                                             | Podocalyxin family                                                           | Gallus gallus (Chicken) | PF06365;                                         |
| F1NXC1     | 395755; | PODXL                  | Podocalyxin (Podocalyxin-like protein 1)                                                                                             | Podocalyxin family                                                           | Gallus gallus (Chicken) | PF06365;                                         |
| Q5ZL53     | 430997; | RCJMB04_7i20           | Polyadenylate-binding protein (PABP)                                                                                                 | Polyadenylate-binding protein type-1 family                                  | Gallus gallus (Chicken) | PF00658;PF00076;                                 |
| A0A1D5PF07 | 421404; | PPM1B RCJMB04_26p17    | Protein-serine/threonine phosphatase (EC 3.1.3.16)                                                                                   | PP2C family                                                                  | Gallus gallus (Chicken) | PF00481;PF07830;                                 |
| F1NCD7     | 422134; | PIN4                   | Peptidyl-prolyl cis-trans isomerase (EC 5.2.1.8)                                                                                     | PpiC/parvulin rotamase family, PIN4 subfamily                                | Gallus gallus (Chicken) |                                                  |
| Q5ZIV0     | 772354; | RCJMB04_23h2           | Serine/threonine-protein phosphatase (EC 3.1.3.16)                                                                                   | PPP phosphatase family                                                       | Gallus gallus (Chicken) | PF00149;                                         |
| P62207     | 396019; | PPP1CB                 | Serine/threonine-protein phosphatase PP1-beta catalytic subunit (PP-1B) (EC 3.1.3.16) (EC 3.1.3.53)                                  | PPP phosphatase family, PP-1 subfamily                                       | Gallus gallus (Chicken) | PF00149;PF16891;                                 |
| P48463     | 396021; | PPP2CA                 | Serine/threonine-protein phosphatase 2A catalytic subunit alpha isoform (PP2A-alpha) (EC 3.1.3.16)                                   | PPP phosphatase family, PP-1 subfamily                                       | Gallus gallus (Chicken) | PF00149;                                         |
| A0A3Q2U159 | 395113; | PPP3CA                 | Serine/threonine-protein phosphatase (EC 3.1.3.16)                                                                                   | PPP phosphatase family, PPP phosphatase family, PP-2B subfamily              | Gallus gallus (Chicken) | PF00149;                                         |
| F1NP43     | 419337; | PFDN4                  | Prefoldin subunit 4                                                                                                                  | Prefoldin subunit beta family                                                | Gallus gallus (Chicken) | PF01920;                                         |
| F1NYT7     | 426297; | PCYOX1                 | Prenylcys_lyase domain-containing protein                                                                                            | Prenylcysteine oxidase family                                                | Gallus gallus (Chicken) | PF07156;                                         |
| Q90YH9     | 395332; | TES                    | Testin                                                                                                                               | Prickle / espinas / testin family                                            | Gallus gallus (Chicken) | PF00412;PF06297;                                 |
| Q5ZL50     | 771904; | PFN2 RCJMB04_7m18      | Profilin                                                                                                                             | Profilin family                                                              | Gallus gallus (Chicken) | PF00235;                                         |
| D5M8S3     | 419980; | PHB                    | Prohibitin                                                                                                                           | Prohibitin family                                                            | Gallus gallus (Chicken) | PF01145;                                         |
| Q5ZMN3     | 771124; | PHB2 RCJMB04_1i23      | Prohibitin-2                                                                                                                         | Prohibitin family                                                            | Gallus gallus (Chicken) | PF01145;                                         |
| A0A1D5PM03 | 427752; | PTGS1                  | Cyclooxygenase-1 (EC 1.14.99.1) (Prostaglandin G/H synthase 1) (Prostaglandin H2 synthase 1) (Prostaglandin-endoperoxide synthase 1) | Prostaglandin G/H synthase family                                            | Gallus gallus (Chicken) | PF03098;PF00008;                                 |
| B6V30      | 427121; | CAST                   | Calpain inhibitor (Calpastatin)                                                                                                      | Protease inhibitor I27 (calpastatin) family                                  | Gallus gallus (Chicken) | PF00748;                                         |
| P26652     | 396483; | TIMP3 IMP-3            | Metalloproteinase inhibitor 3 (21 kDa protein of extracellular matrix) (Tissue inhibitor of metalloproteinases 3) (TIMP-3)           | Protease inhibitor I35 (TIMP) family                                         | Gallus gallus (Chicken) | PF00965;                                         |



|            |            |                      |                                                                                                                                                                                  |                                                                                |                         |                                                          |
|------------|------------|----------------------|----------------------------------------------------------------------------------------------------------------------------------------------------------------------------------|--------------------------------------------------------------------------------|-------------------------|----------------------------------------------------------|
| F1NK40     | 100858010; | A2ML4                | Uncharacterized protein                                                                                                                                                          | Protease inhibitor I39 (alpha-2-macroglobulin) family                          | Gallus gallus (Chicken) | PF00207;PF07703;PF07677;PF01835;PF17791;PF17789;PF07678; |
| F1NX21     | 421862;    | CD109                | Uncharacterized protein                                                                                                                                                          | Protease inhibitor I39 (alpha-2-macroglobulin) family                          | Gallus gallus (Chicken) | PF00207;PF07703;PF07677;PF01835;PF17791;PF07678;         |
| Q5ZJL3     | 430115;    | PSMF1 RCJMB04_17f8   | Proteasome inhibitor PI31 subunit                                                                                                                                                | Proteasome inhibitor PI31 family                                               | Gallus gallus (Chicken) | PF08577;PF11566;                                         |
| Q5ZJS1     | 416853;    | RCJMB04_16d3         | PDZ domain-containing protein                                                                                                                                                    | Proteasome subunit p27 family                                                  | Gallus gallus (Chicken) | PF18265;PF13180;                                         |
| Q5ZI37     | 417425;    | RCJMB04_30k11        | PCI domain-containing protein                                                                                                                                                    | Proteasome subunit p55 family                                                  | Gallus gallus (Chicken) | PF01399;PF18098;                                         |
| Q5F418     | 424926;    | PSMD1 RCJMB04_3m24   | 26S proteasome non-ATPase regulatory subunit 1 (26S proteasome regulatory subunit RPN2) (26S proteasome regulatory subunit S1)                                                   | Proteasome subunit S1 family                                                   | Gallus gallus (Chicken) | PF01851;PF18004;                                         |
| A0A1D5PI39 | 424926;    | PSMD1                | 26S proteasome non-ATPase regulatory subunit 1                                                                                                                                   | Proteasome subunit S1 family                                                   | Gallus gallus (Chicken) | PF01851;PF18004;                                         |
| F1N903     | 416079;    | PSMD6                | 26S proteasome non-ATPase regulatory subunit 6 (26S proteasome regulatory subunit RPN7)                                                                                          | Proteasome subunit S10 family                                                  | Gallus gallus (Chicken) | PF01399;PF10602;                                         |
| Q5ZLU4     | 425294;    | RCJMB04_4n15         | 26S proteasome non-ATPase regulatory subunit 2                                                                                                                                   | Proteasome subunit S2 family                                                   | Gallus gallus (Chicken) | PF01851;PF18051;PF17781;                                 |
| Q5ZMD9     | 426133;    | RCJMB04_2h4          | PCI domain-containing protein                                                                                                                                                    | Proteasome subunit S3 family                                                   | Gallus gallus (Chicken) | PF01399;PF08375;                                         |
| Q5Z14      | 100216364; | RCJMB04_31h10        | 26S proteasome non-ATPase regulatory subunit 4                                                                                                                                   | Proteasome subunit S5A family                                                  | Gallus gallus (Chicken) | PF02809;PF13519;                                         |
| R4GLK3     | 100216364; | PSMD4                | 26S proteasome non-ATPase regulatory subunit 4                                                                                                                                   | Proteasome subunit S5A family                                                  | Gallus gallus (Chicken) | PF02809;PF13519;                                         |
| F1NPA2     | 430878;    | PSMD11               | PCI domain-containing protein                                                                                                                                                    | Proteasome subunit S9 family                                                   | Gallus gallus (Chicken) | PF01399;PF18503;PF18055;                                 |
| A0A1D5PV06 | 374091;    | P4HB                 | Protein disulfide-isomerase (EC 5.3.4.1)                                                                                                                                         | Protein disulfide isomerase family                                             | Gallus gallus (Chicken) | PF00085;                                                 |
| Q8JG64     | 373899;    | PDIA3 ERP57 GRP58    | Protein disulfide-isomerase A3 (EC 5.3.4.1) (Endoplasmic reticulum resident protein 57) (ER protein 57) (ERp57) (Glucose-regulated thiol oxidoreductase 58 kDa protein)          | Protein disulfide isomerase family                                             | Gallus gallus (Chicken) | PF00085;                                                 |
| Q5ZK20     | 420785;    | RCJMB04_13i7         | Protein disulfide-isomerase A4 (EC 5.3.4.1)                                                                                                                                      | Protein disulfide isomerase family                                             | Gallus gallus (Chicken) | PF00085;                                                 |
| F1NK96     | 421940;    | PDIA6                | Protein disulfide-isomerase A6 (EC 5.3.4.1)                                                                                                                                      | Protein disulfide isomerase family                                             | Gallus gallus (Chicken) | PF00085;                                                 |
| Q5ZIM7     | 420867;    | RCJMB04_24o2         | Uncharacterized protein                                                                                                                                                          | Protein disulfide isomerase family                                             | Gallus gallus (Chicken) | PF00085;                                                 |
|            |            |                      |                                                                                                                                                                                  |                                                                                |                         |                                                          |
| F1NBD7     | 396252;    | CDK1                 | Cyclin-dependent kinase 1                                                                                                                                                        | Protein kinase superfamily                                                     | Gallus gallus (Chicken) | PF00069;                                                 |
| B6E1W1     | 100190948; | Cdk5                 | Cyclin-dependent kinase 5                                                                                                                                                        | Protein kinase superfamily                                                     | Gallus gallus (Chicken) | PF00069;                                                 |
| F1NGM2     | 416745;    | COQ8A                | Atypical kinase COQ8A, mitochondrial (Chaperone activity of bc1 complex-like) (Coenzyme Q protein 8A) (aarF domain-containing protein kinase 3)                                  | Protein kinase superfamily, ADCK protein kinase family                         | Gallus gallus (Chicken) | PF03109;                                                 |
| A0A1D5NWB8 | 374182;    | ROCK2                | Rho-associated protein kinase 2 (EC 2.7.11.1) (Rho-associated, coiled-coil-containing protein kinase 2) (Rho-associated, coiled-coil-containing protein kinase II) (p164 ROCK-2) | Protein kinase superfamily, AGC Ser/Thr protein kinase family                  | Gallus gallus (Chicken) | PF00069;PF08912;                                         |
| A0A3Q2TTH6 | 374182;    | ROCK2                | Rho-associated protein kinase 2 (EC 2.7.11.1) (Rho-associated, coiled-coil-containing protein kinase 2) (Rho-associated, coiled-coil-containing protein kinase II) (p164 ROCK-2) | Protein kinase superfamily, AGC Ser/Thr protein kinase family                  | Gallus gallus (Chicken) | PF00069;PF08912;                                         |
| F1NK88     | 374182;    | ROCK2                | Rho-associated protein kinase 2 (EC 2.7.11.1) (Rho-associated, coiled-coil-containing protein kinase 2) (Rho-associated, coiled-coil-containing protein kinase II) (p164 ROCK-2) | Protein kinase superfamily, AGC Ser/Thr protein kinase family                  | Gallus gallus (Chicken) | PF00069;PF08912;                                         |
| A0A1D5PK41 | 373970;    | ROCK1                | Rho-associated protein kinase (EC 2.7.11.1)                                                                                                                                      | Protein kinase superfamily, AGC Ser/Thr protein kinase family                  | Gallus gallus (Chicken) | PF00069;PF08912;                                         |
| F1NRH6     | 373970;    | ROCK1                | Rho-associated protein kinase (EC 2.7.11.1)                                                                                                                                      | Protein kinase superfamily, AGC Ser/Thr protein kinase family                  | Gallus gallus (Chicken) | PF00069;PF08912;                                         |
| Q5F3U4     | 416588;    | PDPK1 RCJMB04_6p10   | 3-phosphoinositide-dependent protein kinase 1 (EC 2.7.11.1)                                                                                                                      | Protein kinase superfamily, AGC Ser/Thr protein kinase family, PDPK1 subfamily | Gallus gallus (Chicken) | PF14593;PF00069;                                         |
| A0A1D5PXN4 | 415905;    | PRKCD                | Protein kinase C delta type (EC 2.7.11.13) (nPKC-delta)                                                                                                                          | Protein kinase superfamily, AGC Ser/Thr protein kinase family, PKC subfamily   | Gallus gallus (Chicken) | PF00130;PF00069;PF00433;                                 |
| Q5ZKE2     | 415905;    | RCJMB04_11g12        | Protein kinase C delta type (EC 2.7.11.13) (nPKC-delta)                                                                                                                          | Protein kinase superfamily, AGC Ser/Thr protein kinase family, PKC subfamily   | Gallus gallus (Chicken) | PF00130;PF00069;PF00433;                                 |
| A0A1L1RRF3 | 396445;    | MYLK                 | Myosin light chain kinase, smooth muscle (EC 2.7.11.18) (Myosin light chain kinase, smooth muscle, deglutamylated form) (Telokin)                                                | Protein kinase superfamily, CAMK Ser/Thr protein kinase family                 | Gallus gallus (Chicken) | PF00041;PF07679;PF00069;                                 |
| E1C906     | 396445;    | MYLK                 | Myosin light chain kinase, smooth muscle (EC 2.7.11.18) (Myosin light chain kinase, smooth muscle, deglutamylated form) (Telokin)                                                | Protein kinase superfamily, CAMK Ser/Thr protein kinase family                 | Gallus gallus (Chicken) | PF00041;PF07679;PF00069;                                 |
| A2NBE2     | 396356;    |                      | Myosin light chain kinase 2, skeletal/cardiac muscle (EC 2.7.11.18)                                                                                                              | Protein kinase superfamily, CAMK Ser/Thr protein kinase family                 | Gallus gallus (Chicken) | PF00069;                                                 |
| Q5ZK10     | 422688;    | CAMK2D RCJMB04_10k21 | Calcium/calmodulin-dependent protein kinase type II delta chain (CaM kinase II subunit delta) (CaM-kinase II delta chain) (CaMK-II subunit delta) (EC 2.7.11.17)                 | Protein kinase superfamily, CAMK Ser/Thr protein kinase family, CaMK subfamily | Gallus gallus (Chicken) | PF08332;PF00069;                                         |

|            |            |                         |                                                                                                                                                                                                                                                                                                                                                                                     |                                                                                                                                  |                         |                                  |
|------------|------------|-------------------------|-------------------------------------------------------------------------------------------------------------------------------------------------------------------------------------------------------------------------------------------------------------------------------------------------------------------------------------------------------------------------------------|----------------------------------------------------------------------------------------------------------------------------------|-------------------------|----------------------------------|
| P13863     | 396252;    | CDK1 CDC2               | Cyclin-dependent kinase 1 (CDK1) (EC 2.7.11.22) (EC 2.7.11.23) (Cell division control protein 2 homolog) (Cell division protein kinase 1) (p34 protein kinase)                                                                                                                                                                                                                      | Protein kinase superfamily, CMGC Ser/Thr protein kinase family, CDC2/CDKX subfamily                                              | Gallus gallus (Chicken) | PF00069;                         |
| A0A1D5PIQ5 | 421183;    | MAPK14                  | Mitogen-activated protein kinase (EC 2.7.11.24)                                                                                                                                                                                                                                                                                                                                     | Protein kinase superfamily, CMGC Ser/Thr protein kinase family, MAP kinase subfamily                                             | Gallus gallus (Chicken) | PF00069;                         |
| A0A3Q2U670 | 421183;    | MAPK14                  | Mitogen-activated protein kinase (EC 2.7.11.24)                                                                                                                                                                                                                                                                                                                                     | Protein kinase superfamily, CMGC Ser/Thr protein kinase family, MAP kinase subfamily                                             | Gallus gallus (Chicken) | PF00069;                         |
| P21868     | 432370;    | CSNK2A1                 | Casein kinase II subunit alpha (CK II) (EC 2.7.11.1)                                                                                                                                                                                                                                                                                                                                | Protein kinase superfamily, Ser/Thr protein kinase family, CK2 subfamily                                                         | Gallus gallus (Chicken) | PF00069;                         |
| Q90891     | 396349;    | MAP2K2 MEK2 MKK2 PRKMK2 | Dual specificity mitogen-activated protein kinase kinase 2 (MAP kinase kinase 2) (MAPKK 2) (EC 2.7.12.2) (ERK activator kinase 2) (MAPK/ERK kinase 2) (MEK2)                                                                                                                                                                                                                        | Protein kinase superfamily, STE Ser/Thr protein kinase family, MAP kinase kinase subfamily                                       | Gallus gallus (Chicken) | PF00069;                         |
| Q9DF58     | 374018;    | ILK ILK1 ILK2           | Integrin-linked protein kinase (EC 2.7.11.1) (59 kDa serine/threonine-protein kinase) (Beta-integrin-linked kinase) (ILK-1) (ILK-2) (p59ILK)                                                                                                                                                                                                                                        | Protein kinase superfamily, TKL Ser/Thr protein kinase family                                                                    | Gallus gallus (Chicken) | PF12796;PF07714;                 |
| A0A1D5PXS9 | 396396;    | CSK                     | Tyrosine-protein kinase (EC 2.7.10.2)                                                                                                                                                                                                                                                                                                                                               | Protein kinase superfamily, Tyr protein kinase family                                                                            | Gallus gallus (Chicken) | PF07714;PF00017;PF00018;         |
| P41239     | 396396;    | CSK                     | Tyrosine-protein kinase CSK (EC 2.7.10.2) (C-Src kinase)                                                                                                                                                                                                                                                                                                                            | Protein kinase superfamily, Tyr protein kinase family, CSK subfamily                                                             | Gallus gallus (Chicken) | PF07714;PF00017;PF00018;         |
| P00523     | 396442;    | SRC                     | Proto-oncogene tyrosine-protein kinase Src (EC 2.7.10.2) (Proto-oncogene c-Src) (pp60c-src) (p60-Src)                                                                                                                                                                                                                                                                               | Protein kinase superfamily, Tyr protein kinase family, SRC subfamily                                                             | Gallus gallus (Chicken) | PF07714;PF00017;PF00018;         |
| A0A1D5NW04 | 424542;    | PRKACB                  | cAMP-dependent protein kinase (EC 2.7.11.11)                                                                                                                                                                                                                                                                                                                                        | Protein kinase superfamily; Protein kinase superfamily, AGC Ser/Thr protein kinase family, cAMP subfamily                        | Gallus gallus (Chicken) | PF00069;                         |
| A0A1D5P0J5 | 424542;    | PRKACB                  | cAMP-dependent protein kinase (EC 2.7.11.11)                                                                                                                                                                                                                                                                                                                                        | Protein kinase superfamily; Protein kinase superfamily, AGC Ser/Thr protein kinase family, cAMP subfamily                        | Gallus gallus (Chicken) | PF00069;                         |
| A0A1D5PLV3 | 424542;    | PRKACB                  | cAMP-dependent protein kinase (EC 2.7.11.11)                                                                                                                                                                                                                                                                                                                                        | Protein kinase superfamily; Protein kinase superfamily, AGC Ser/Thr protein kinase family, cAMP subfamily                        | Gallus gallus (Chicken) | PF00069;                         |
| O57513     | 395928;    | akt1                    | RAC-PK-alpha (EC 2.7.11.1) (RAC-alpha serine/threonine-protein kinase)                                                                                                                                                                                                                                                                                                              | Protein kinase superfamily; Protein kinase superfamily, AGC Ser/Thr protein kinase family, RAC subfamily                         | Gallus gallus (Chicken) | PF00169;PF00069;PF00433;         |
| A0A3Q2TVV5 | 418335;    | GSK3A                   | Glycogen synthase kinase-3 beta (EC 2.7.11.26)                                                                                                                                                                                                                                                                                                                                      | Protein kinase superfamily; Protein kinase superfamily, CMGC Ser/Thr protein kinase family, GSK-3 subfamily                      | Gallus gallus (Chicken) | PF00069;                         |
| Q8UWG6     | 373953;    |                         | Mitogen-activated protein kinase (EC 2.7.11.24)                                                                                                                                                                                                                                                                                                                                     | Protein kinase superfamily; Protein kinase superfamily, CMGC Ser/Thr protein kinase family, MAP kinase subfamily, Protein kinase | Gallus gallus (Chicken) | PF00069;                         |
| Q90687     | 395815;    | PTPN11                  | Tyrosine-protein phosphatase non-receptor type 11 (EC 3.1.3.48) (SH-PTP2) (cSH-PTP2)                                                                                                                                                                                                                                                                                                | Protein-tyrosine phosphatase family, Non-receptor class 2 subfamily                                                              | Gallus gallus (Chicken) | PF00017;PF00102;                 |
| A0A1D5PFX7 | 431602;    | PTPRD                   | Protein-tyrosine-phosphatase (EC 3.1.3.48)                                                                                                                                                                                                                                                                                                                                          | Protein-tyrosine phosphatase family, Receptor class 2A subfamily                                                                 | Gallus gallus (Chicken) | PF00041;PF07679;PF00102;         |
| Q5F310     | 427127;    | PRRC1 RCJMB04_16h2      | Protein PRRC1 (Proline-rich and coiled-coil-containing protein 1)                                                                                                                                                                                                                                                                                                                   | PRRC1 family                                                                                                                     | Gallus gallus (Chicken) | PF01931;                         |
| Q5ZJH9     | 422196;    | DKC1 RCJMB04_17p9       | H/ACA ribonucleoprotein complex subunit DKC1 (EC 5.4.99.-) (Dyskerin)                                                                                                                                                                                                                                                                                                               | Pseudouridine synthase TruB family                                                                                               | Gallus gallus (Chicken) | PF08068;PF01472;PF16198;PF01509; |
| Q5F3H4     | 418520;    | PSMG1 RCJMB04_16p8      | Proteasome assembly chaperone 1                                                                                                                                                                                                                                                                                                                                                     | PSMG1 family                                                                                                                     | Gallus gallus (Chicken) | PF16094;                         |
| E1BZ56     | 421040;    | PSMG2                   | Proteasome assembly chaperone 2                                                                                                                                                                                                                                                                                                                                                     | PSMG2 family                                                                                                                     | Gallus gallus (Chicken) | PF09754;                         |
| Q5ZK88     | 418955;    | PSPC1 RCJMB04_12f9      | Paraspeckle component 1                                                                                                                                                                                                                                                                                                                                                             | PSPC family                                                                                                                      | Gallus gallus (Chicken) | PF08075;PF00076;                 |
| Q04205     | 396439;    | TNS                     | Tensin                                                                                                                                                                                                                                                                                                                                                                              | PTEN phosphatase protein family                                                                                                  | Gallus gallus (Chicken) | PF08416;PF10409;PF00017;         |
| Q5ZM56     | 426329;    | PTPA RCJMB04_3b8        | Serine/threonine-protein phosphatase 2A activator (EC 5.2.1.8) (Phosphotyrosyl phosphatase activator)                                                                                                                                                                                                                                                                               | PTPA-type PPlase family                                                                                                          | Gallus gallus (Chicken) | PF03095;                         |
| P31335     | 396091;    | ATIC PURH               | Bifunctional purine biosynthesis protein ATIC (AICAR transformylase/inosine monophosphate cyclohydrolase) (ATIC) [Includes: Phosphoribosylaminoimidazolecarboxamide formyltransferase (EC 2.1.2.3) (5-aminoimidazole-4-carboxamide ribonucleotide formyltransferase) (AICAR formyltransferase) (AICAR transformylase); IMP cyclohydrolase (EC 3.5.4.10) (IMP synthase) (inosinase)] | PurH family                                                                                                                      | Gallus gallus (Chicken) | PF01808;PF02142;                 |
| A0A1D5NUK5 | 100857155; | APRT                    | Adenine phosphoribosyltransferase (EC 2.4.2.7)                                                                                                                                                                                                                                                                                                                                      | Purine/pyrimidine phosphoribosyltransferase family                                                                               | Gallus gallus (Chicken) | PF00156;                         |
| Q9W719     | 395653;    | HPRT1 HPRT              | Hypoxanthine-guanine phosphoribosyltransferase (HGPRT) (HGPRTase) (EC 2.4.2.8)                                                                                                                                                                                                                                                                                                      | Purine/pyrimidine phosphoribosyltransferase family                                                                               | Gallus gallus (Chicken) | PF00156;                         |
| A0A1D5PKK0 | 769203;    | PYCR1                   | Pyroline-5-carboxylate reductase (EC 1.5.1.2)                                                                                                                                                                                                                                                                                                                                       | Pyroline-5-carboxylate reductase family                                                                                          | Gallus gallus (Chicken) | PF03807;PF14748;                 |
| A0A1D5NV93 | 420293;    | PYCR1                   | Pyroline-5-carboxylate reductase (EC 1.5.1.2)                                                                                                                                                                                                                                                                                                                                       | Pyroline-5-carboxylate reductase family                                                                                          | Gallus gallus (Chicken) | PF03807;PF14748;                 |
| P00548     | 396456;    | PKM                     | Pyruvate kinase PKM (EC 2.7.1.40)                                                                                                                                                                                                                                                                                                                                                   | Pyruvate kinase family                                                                                                           | Gallus gallus (Chicken) | PF00224;PF02887;                 |
| A0A1D5P9V0 | 396456;    | PKLR                    | Pyruvate kinase (EC 2.7.1.40)                                                                                                                                                                                                                                                                                                                                                       | Pyruvate kinase family                                                                                                           | Gallus gallus (Chicken) | PF00224;PF02887;                 |
| F1NW43     | 396456;    | PKLR                    | Pyruvate kinase (EC 2.7.1.40)                                                                                                                                                                                                                                                                                                                                                       | Pyruvate kinase family                                                                                                           | Gallus gallus (Chicken) | PF00224;PF02887;                 |
| O93382     | 395854;    |                         | Rab GDP dissociation inhibitor                                                                                                                                                                                                                                                                                                                                                      | Rab GDI family                                                                                                                   | Gallus gallus (Chicken) | PF00996;                         |
| Q7SZ16     | 395109;    | RFTN1                   | Raftlin (Raft-linking protein)                                                                                                                                                                                                                                                                                                                                                      | Raftlin family                                                                                                                   | Gallus gallus (Chicken) | PF15250;                         |

|            |         |                             |                                                                                                                                                                                                                                                                                                                                                                                                         |                                                                      |                         |                                                          |
|------------|---------|-----------------------------|---------------------------------------------------------------------------------------------------------------------------------------------------------------------------------------------------------------------------------------------------------------------------------------------------------------------------------------------------------------------------------------------------------|----------------------------------------------------------------------|-------------------------|----------------------------------------------------------|
| Q5ZJJ2     | 417563; | RPA1 RCJMB04_1716           | Replication protein A 70 kDa DNA-binding subunit (RP-A p70) (Replication factor A protein 1) (RF-A protein 1)                                                                                                                                                                                                                                                                                           | Replication factor A protein 1 family                                | Gallus gallus (Chicken) | PF04057;PF08646;PF16900;PF01336;                         |
| Q5ZHM5     | 419397; | RER1 RCJMB04_35f13          | Protein RER1                                                                                                                                                                                                                                                                                                                                                                                            | RER1 family                                                          | Gallus gallus (Chicken) | PF03248;                                                 |
| F1NLT8     | 417941; | ARHGDB                      | Uncharacterized protein                                                                                                                                                                                                                                                                                                                                                                                 | Rho GDI family                                                       | Gallus gallus (Chicken) | PF02115;                                                 |
| F1NIP5     | 422185; | PRPS1L1                     | Ribose-phosphate diphosphokinase (EC 2.7.6.1)                                                                                                                                                                                                                                                                                                                                                           | Ribose-phosphate pyrophosphokinase family                            | Gallus gallus (Chicken) | PF14572;PF13793;                                         |
| Q5ZL26     | 416521; | PRPSAP2 RCJMB04_8b17        | Phosphoribosyl pyrophosphate synthase-associated protein 2 (PRPP synthase-associated protein 2)                                                                                                                                                                                                                                                                                                         | Ribose-phosphate pyrophosphokinase family                            | Gallus gallus (Chicken) | PF14572;PF13793;                                         |
| F1NZC6     | 416521; | PRPSAP2                     | Phosphoribosyl pyrophosphate synthase-associated protein 2                                                                                                                                                                                                                                                                                                                                              | Ribose-phosphate pyrophosphokinase family                            | Gallus gallus (Chicken) | PF14572;PF13793;                                         |
| Q5ZLR5     | 415752; | UQCRFS1 RCJMB04_5b19        | Cytochrome b-c1 complex subunit Rieske, mitochondrial (EC 7.1.1.8) (Complex III subunit 5) (Cytochrome b-c1 complex subunit 5) (Rieske iron-sulfur protein) (RISP) (Rieske protein UQCRFS1) (Ubiquinol-cytochrome c reductase iron-sulfur subunit) [Cleaved into: Cytochrome b-c1 complex subunit 9 (Su9)/Subunit 9] (Complex III subunit IX) (UQCRFS1 mitochondrial targeting sequence) (UQCRFS1 MTS)I | Rieske iron-sulfur protein family                                    | Gallus gallus (Chicken) | PF00355;PF09165;PF02921;                                 |
| E1C1Y0     | 424468; | RTCA                        | RNA 3'-terminal phosphate cyclase (EC 6.5.1.4) (RNA terminal phosphate cyclase domain-containing protein 1)                                                                                                                                                                                                                                                                                             | RNA 3'-terminal cyclase family, Type 1 subfamily                     | Gallus gallus (Chicken) | PF01137;PF05189;                                         |
| Q5ZMN9     | 422621; | RCJMB04_1114                | DNA-directed RNA polymerase subunit beta (EC 2.7.7.6)                                                                                                                                                                                                                                                                                                                                                   | RNA polymerase beta chain family                                     | Gallus gallus (Chicken) | PF04563;PF04561;PF04565;PF04566;PF04567;PF00562;PF04560; |
| Q5ZL34     | 417844; | CPSF6 RCJMB04_7p13          | Cleavage and polyadenylation specificity factor subunit 6                                                                                                                                                                                                                                                                                                                                               | RRM CPSF6/7 family                                                   | Gallus gallus (Chicken) | PF00076;                                                 |
| A0A1D5P9A5 | 417844; | CPSF6                       | Cleavage and polyadenylation specificity factor subunit 6                                                                                                                                                                                                                                                                                                                                               | RRM CPSF6/7 family                                                   | Gallus gallus (Chicken) | PF00076;                                                 |
| F1NGU9     | 417844; | CPSF6                       | Cleavage and polyadenylation specificity factor subunit 6                                                                                                                                                                                                                                                                                                                                               | RRM CPSF6/7 family                                                   | Gallus gallus (Chicken) | PF00076;                                                 |
| Q9PW24     | 395637; | HuA                         | ELAV-like protein                                                                                                                                                                                                                                                                                                                                                                                       | RRM elav family                                                      | Gallus gallus (Chicken) | PF00076;                                                 |
| A0A1D5PSH2 | 419148; | RALY                        | RRM domain-containing protein                                                                                                                                                                                                                                                                                                                                                                           | RRM HNRPC family, RALY subfamily                                     | Gallus gallus (Chicken) | PF00076;                                                 |
| A0A3Q2U2Y0 | 419148; | RALY                        | RRM domain-containing protein                                                                                                                                                                                                                                                                                                                                                                           | RRM HNRPC family, RALY subfamily                                     | Gallus gallus (Chicken) | PF00076;                                                 |
| O42254     | 395953; | IGF2BP1 VICKZ1 ZBP1         | Insulin-like growth factor 2 mRNA-binding protein 1 (IGF2 mRNA-binding protein 1) (IMP-1) (IGF-II mRNA-binding protein 1) (VICKZ family member 1) (Zip-code binding polypeptide) (Zipcode-binding protein 1) (ZBP-1)                                                                                                                                                                                    | RRM IMP/VICKZ family                                                 | Gallus gallus (Chicken) | PF00013;PF00076;                                         |
| Q5ZLP8     | 420617; | IGF2BP3 VICKZ3 RCJMB04_5e15 | Insulin-like growth factor 2 mRNA-binding protein 3 (IGF2 mRNA-binding protein 3) (IMP-3) (IGF-II mRNA-binding protein 3) (VICKZ family member 3)                                                                                                                                                                                                                                                       | RRM IMP/VICKZ family                                                 | Gallus gallus (Chicken) | PF00013;PF00076;                                         |
| Q6J4Y8     | 414144; |                             | FUS/TLS                                                                                                                                                                                                                                                                                                                                                                                                 | RRM TET family                                                       | Gallus gallus (Chicken) | PF00076;PF00641;                                         |
| Q5ZKD5     | 423845; | RRP12 RCJMB04_11j1          | RRP12-like protein                                                                                                                                                                                                                                                                                                                                                                                      | RRP12 family                                                         | Gallus gallus (Chicken) | PF08161;                                                 |
| F1NY13     | 418064; | RTCB                        | RNA-splicing ligase RtcB homolog (EC 6.5.1.8) (3'-phosphate/5'-hydroxy nucleic acid ligase)                                                                                                                                                                                                                                                                                                             | RtcB family                                                          | Gallus gallus (Chicken) | PF01139;                                                 |
| Q90706     | 396326; | CLE7                        | RNA transcription, translation and transport factor protein                                                                                                                                                                                                                                                                                                                                             | RTRAF family                                                         | Gallus gallus (Chicken) | PF10036;                                                 |
| Q5ZIC4     | 416022; | RCJMB04_28a17               | RuvB-like helicase (EC 3.6.4.12)                                                                                                                                                                                                                                                                                                                                                                        | RuvB family                                                          | Gallus gallus (Chicken) | PF06068;PF17856;                                         |
| P24479     | 396075; | S100A11                     | Protein S100-A11 (Calgizzarin) (S100 calcium-binding protein A11)                                                                                                                                                                                                                                                                                                                                       | S-100 family                                                         | Gallus gallus (Chicken) | PF00036;PF01023;                                         |
| P28318     | 426356; |                             | Protein MRP-126                                                                                                                                                                                                                                                                                                                                                                                         | S-100 family                                                         | Gallus gallus (Chicken) | PF01023;                                                 |
| P38024     | 396534; | AIRC                        | Multifunctional protein ADE2 [Includes: Phosphoribosylaminoimidazole-succinocarboxamide synthase (EC 6.3.2.6) (SAICAR synthetase); Phosphoribosylaminoimidazole carboxylase (EC 4.1.1.21) (AIR carboxylase) (AIRC)]                                                                                                                                                                                     | SAICAR synthetase family; AIR carboxylase family, Class II subfamily | Gallus gallus (Chicken) | PF00731;PF01259;                                         |
| E1C8A2     | 418234; | SAMM50                      | POTRA domain-containing protein                                                                                                                                                                                                                                                                                                                                                                         | SAM50/omp85 family                                                   | Gallus gallus (Chicken) | PF01103;                                                 |
| Q90ZH5     | 374206; | chSAP18                     | Histone deacetylase complex subunit SAP18                                                                                                                                                                                                                                                                                                                                                               | SAP18 family                                                         | Gallus gallus (Chicken) | PF06487;                                                 |
| F1NV32     | 769853; | SCAMP2                      | Secretory carrier-associated membrane protein (Secretory carrier membrane protein)                                                                                                                                                                                                                                                                                                                      | SCAMP family                                                         | Gallus gallus (Chicken) | PF04144;                                                 |
| H9L0D7     | 426359; | WASF2                       | Wiskott-Aldrich syndrome protein family member (WASP family protein member)                                                                                                                                                                                                                                                                                                                             | SCAR/WAVE family                                                     | Gallus gallus (Chicken) | PF02205;                                                 |
| A0A1D5PY29 | 422360; | STAG2                       | SCD domain-containing protein                                                                                                                                                                                                                                                                                                                                                                           | SCC3 family                                                          | Gallus gallus (Chicken) | PF08514;                                                 |
| E1BSU3     | 422360; | STAG2                       | SCD domain-containing protein                                                                                                                                                                                                                                                                                                                                                                           | SCC3 family                                                          | Gallus gallus (Chicken) | PF08514;                                                 |
| A0A3Q2U072 | 429671; | SCO2                        | Uncharacterized protein                                                                                                                                                                                                                                                                                                                                                                                 | SCO1/2 family                                                        | Gallus gallus (Chicken) | PF02630;                                                 |
| A0A1D5P0E2 | 423335; | SEC23A                      | Protein transport protein SEC23                                                                                                                                                                                                                                                                                                                                                                         | SEC23/SEC24 family, SEC23 subfamily                                  | Gallus gallus (Chicken) | PF00626;PF08033;PF04815;PF04811;PF04810;                 |
| A0A3Q2UGR5 | 423742; | SEC24C                      | Uncharacterized protein                                                                                                                                                                                                                                                                                                                                                                                 | SEC23/SEC24 family, SEC24 subfamily                                  | Gallus gallus (Chicken) | PF00626;PF08033;PF04815;PF04811;PF04810;                 |

|            |         |                      |                                                                                                                                                                                                                                                                                                                                             |                                                    |                         |                                          |
|------------|---------|----------------------|---------------------------------------------------------------------------------------------------------------------------------------------------------------------------------------------------------------------------------------------------------------------------------------------------------------------------------------------|----------------------------------------------------|-------------------------|------------------------------------------|
| E1BUD8     | 423742; | SEC24C               | Uncharacterized protein                                                                                                                                                                                                                                                                                                                     | SEC23/SEC24 family, SEC24 subfamily                | Gallus gallus (Chicken) | PF00626;PF08033;PF04815;PF04811;PF04810; |
| F1NBN1     | 416023; | SEC61A1              | Plug_translocon domain-containing protein                                                                                                                                                                                                                                                                                                   | SecY/SEC61-alpha family                            | Gallus gallus (Chicken) | PF10559;PF00344;                         |
| H9KYX6     | 425664; | SELENBP1             | Methanethiol oxidase (EC 1.8.3.4)                                                                                                                                                                                                                                                                                                           | Selenium-binding protein family                    | Gallus gallus (Chicken) | PF05694;                                 |
| F1NBU4     | 420115; | HOMER3               | Sema domain-containing protein                                                                                                                                                                                                                                                                                                              | Semaphorin family                                  | Gallus gallus (Chicken) | PF01437;PF01403;                         |
| E1C4L3     | 425255; | SPR                  | Sepiapterin reductase (EC 1.1.1.153)                                                                                                                                                                                                                                                                                                        | Sepiapterin reductase family                       | Gallus gallus (Chicken) | PF00106;                                 |
| F1NDH2     | 421543; | AGT                  | Angiotensin 1-10 (Angiotensin 1-4) (Angiotensin 1-5) (Angiotensin 1-7) (Angiotensin 1-8) (Angiotensin 1-9) (Angiotensin 2-8) (Angiotensin 3-8) (Angiotensin I) (Angiotensin II) (Angiotensin III) (Angiotensin IV) (Angiotensin-1) (Angiotensin-2) (Angiotensin-3) (Angiotensin-4) (Angiotensinogen) (Des-Asp11-angiotensin II) (Serpin A8) | Serpin family                                      | Gallus gallus (Chicken) | PF00079;                                 |
| A0A411G5W6 | 396058; |                      | Ovalbumin                                                                                                                                                                                                                                                                                                                                   | Serpin family                                      | Gallus gallus (Chicken) | PF00079;                                 |
| A0A1D5PI58 | 420898; | OVALX                | SERPIN domain-containing protein                                                                                                                                                                                                                                                                                                            | Serpin family                                      | Gallus gallus (Chicken) | PF00079;                                 |
| E1BTF4     | 420897; | OVALY                | SERPIN domain-containing protein                                                                                                                                                                                                                                                                                                            | Serpin family                                      | Gallus gallus (Chicken) | PF00079;                                 |
| I0J178     | 420897; | oval-Y               | Ovalbumin-related Y                                                                                                                                                                                                                                                                                                                         | Serpin family                                      | Gallus gallus (Chicken) | PF00079;                                 |
| E1BTH3     | 420896; | SERPINB2             | SERPIN domain-containing protein                                                                                                                                                                                                                                                                                                            | Serpin family                                      | Gallus gallus (Chicken) | PF00079;                                 |
| P13731     | 396228; | SERPINH1 HSP47       | Serpin H1 (47 kDa heat shock protein) (Collagen-binding protein) (Colligin)                                                                                                                                                                                                                                                                 | Serpin family                                      | Gallus gallus (Chicken) | PF00079;                                 |
| E1C7T1     | 423434; | SPIA1                | SERPIN domain-containing protein                                                                                                                                                                                                                                                                                                            | Serpin family                                      | Gallus gallus (Chicken) | PF00079;                                 |
| E1BS56     | 423433; | SPIA4                | SERPIN domain-containing protein                                                                                                                                                                                                                                                                                                            | Serpin family                                      | Gallus gallus (Chicken) | PF00079;                                 |
| A0A1D5PLZ2 | 395877; | SERPIND1             | SERPIN domain-containing protein                                                                                                                                                                                                                                                                                                            | Serpin family                                      | Gallus gallus (Chicken) | PF00079;                                 |
| P01012     | 396058; | SERPINB14            | Ovalbumin (Allergen Gal d II) (Egg albumin) (Plakalbumin) (allergen Gal d 2)                                                                                                                                                                                                                                                                | Serpin family, Ov-serpin subfamily                 | Gallus gallus (Chicken) | PF00079;                                 |
| P01014     | 420897; | SERPINB14B Y         | Ovalbumin-related protein Y (Gene Y protein)                                                                                                                                                                                                                                                                                                | Serpin family, Ov-serpin subfamily                 | Gallus gallus (Chicken) | PF00079;                                 |
| O73790     | 395715; | SERPINB10 MENT       | Heterochromatin-associated protein MENT (Myeloid and erythroid nuclear termination stage-specific protein) (Serpin B10)                                                                                                                                                                                                                     | Serpin family, Ov-serpin subfamily                 | Gallus gallus (Chicken) | PF00079;                                 |
| A0A3Q2TTT6 | 420894; | SERPINB1             | SERPIN domain-containing protein                                                                                                                                                                                                                                                                                                            | Serpin family; Serpin family, Ov-serpin subfamily  | Gallus gallus (Chicken) | PF00079;                                 |
| E1BTE2     | 420900; | SERPINB5             | SERPIN domain-containing protein                                                                                                                                                                                                                                                                                                            | Serpin family; Serpin family, Ov-serpin subfamily  | Gallus gallus (Chicken) | PF00079;                                 |
| F1P1L8     | 420895; | SERPINB6             | SERPIN domain-containing protein                                                                                                                                                                                                                                                                                                            | Serpin family; Serpin family, Ov-serpin subfamily  | Gallus gallus (Chicken) | PF00079;                                 |
| Q5ZLB6     | 420895; | RCJMB04_6n9          | SERPIN domain-containing protein                                                                                                                                                                                                                                                                                                            | Serpin family; Serpin family, Ov-serpin subfamily  | Gallus gallus (Chicken) | PF00079;                                 |
| Q5F387     | 419608; | SF3A3 RCJMB04_28g11  | Matrin-type domain-containing protein                                                                                                                                                                                                                                                                                                       | SF3A3 family                                       | Gallus gallus (Chicken) | PF11931;PF16837;PF12108;                 |
| E1C2C3     | 424056; | SF3B1                | SF3b1 domain-containing protein                                                                                                                                                                                                                                                                                                             | SF3B1 family                                       | Gallus gallus (Chicken) | PF08920;                                 |
| A0A1D5PBJ5 | 426396; | SGTA                 | TPR_REGION domain-containing protein                                                                                                                                                                                                                                                                                                        | SGT family                                         | Gallus gallus (Chicken) | PF16546;PF00515;PF13181;                 |
| Q5ZHW6     | 426396; | RCJMB04_32j5         | TPR_REGION domain-containing protein                                                                                                                                                                                                                                                                                                        | SGT family                                         | Gallus gallus (Chicken) | PF16546;PF00515;PF13181;                 |
| Q5F3C9     | 422277; | SH3BGR RCJMB04_21c16 | SH3 domain-binding glutamic acid-rich-like protein                                                                                                                                                                                                                                                                                          | SH3BGR family                                      | Gallus gallus (Chicken) | PF04908;                                 |
| A0A3Q3AY90 | 423919; | SHTN1                | Shootin-1                                                                                                                                                                                                                                                                                                                                   | Shootin family                                     | Gallus gallus (Chicken) |                                          |
| F1NHH9     | 424891; | BDH1A                | Uncharacterized protein                                                                                                                                                                                                                                                                                                                     | Short-chain dehydrogenases/reductases (SDR) family | Gallus gallus (Chicken) | PF00106;                                 |
| F1N8Y3     | 418512; | CBR3                 | Uncharacterized protein                                                                                                                                                                                                                                                                                                                     | Short-chain dehydrogenases/reductases (SDR) family | Gallus gallus (Chicken) | PF00106;                                 |
| Q4JK63     | 418512; |                      | 20-hydroxysteroid dehydrogenase                                                                                                                                                                                                                                                                                                             | Short-chain dehydrogenases/reductases (SDR) family | Gallus gallus (Chicken) | PF00106;                                 |
| A0A1D5PSE2 | 415662; | LOC107049164         | Uncharacterized protein                                                                                                                                                                                                                                                                                                                     | Short-chain dehydrogenases/reductases (SDR) family | Gallus gallus (Chicken) | PF00106;                                 |
| E1BV75     | 423527; | DHRS7                | Uncharacterized protein                                                                                                                                                                                                                                                                                                                     | Short-chain dehydrogenases/reductases (SDR) family | Gallus gallus (Chicken) | PF00106;                                 |
| Q8JIS3     | 374066; | DER                  | D-erythrulose reductase (EC 1.1.1.162) (Probable L-xylulose reductase) (XR) (EC 1.1.1.10)                                                                                                                                                                                                                                                   | Short-chain dehydrogenases/reductases (SDR) family | Gallus gallus (Chicken) |                                          |

|            |            |                                 |                                                                                                                                      |                                                    |                         |                  |
|------------|------------|---------------------------------|--------------------------------------------------------------------------------------------------------------------------------------|----------------------------------------------------|-------------------------|------------------|
| E1C688     | 422567;    | HPGD                            | Uncharacterized protein                                                                                                              | Short-chain dehydrogenases/reductases (SDR) family | Gallus gallus (Chicken) | PF00106;         |
| A0A1D5PM72 | 769787;    | HSD17B12                        | Uncharacterized protein                                                                                                              | Short-chain dehydrogenases/reductases (SDR) family | Gallus gallus (Chicken) | PF00106;         |
| A0A1D5P648 | 776432;    | RDH16                           | Uncharacterized protein                                                                                                              | Short-chain dehydrogenases/reductases (SDR) family | Gallus gallus (Chicken) | PF00106;         |
| F1N9C1     | 415661;    | LOC415661 NADB-LER3             | NADB-LER3                                                                                                                            | Short-chain dehydrogenases/reductases (SDR) family | Gallus gallus (Chicken) | PF00106;         |
| F1NDD1     | 423866;    | SFXN2                           | Sidoreflexin                                                                                                                         | Sidoreflexin family                                | Gallus gallus (Chicken) | PF03820;         |
| A0A3Q2U0F7 | 428972;    | SFXN3                           | Sidoreflexin                                                                                                                         | Sidoreflexin family                                | Gallus gallus (Chicken) | PF03820;         |
| E1BRE2     | 420834;    | SIRT5                           | NAD-dependent protein deacetylase sirtuin-5, mitochondrial (EC 2.3.1.-) (Regulatory protein SIR2 homolog 5)                          | Sirtuin family, Class III subfamily                | Gallus gallus (Chicken) | PF02146;         |
| R9PXP3     | 420834;    | SIRT5                           | NAD-dependent protein deacetylase sirtuin-5, mitochondrial (EC 2.3.1.-) (Regulatory protein SIR2 homolog 5) (SIR2-like protein 5)    | Sirtuin family, Class III subfamily                | Gallus gallus (Chicken) | PF02146;         |
| Q5ZKF5     | 416319;    | SKP1 SKP1A RCJMB04_11c19        | S-phase kinase-associated protein 1 (Cyclin-A/CDK2-associated protein p19) (S-phase kinase-associated protein 1A) (p19A) (p19skp1)   | SKP1 family                                        | Gallus gallus (Chicken) | PF01466;PF03931; |
| Q5ZKR9     | 769725;    | ARF4 RCJMB04_9i5                | Uncharacterized protein                                                                                                              | Small GTPase superfamily, Arf family               | Gallus gallus (Chicken) | PF00025;         |
| E1BVB0     | 417934;    | ARL1                            | Uncharacterized protein                                                                                                              | Small GTPase superfamily, Arf family               | Gallus gallus (Chicken) | PF00025;         |
| F1P0Z7     | 416109;    | ARL8B                           | Uncharacterized protein                                                                                                              | Small GTPase superfamily, Arf family               | Gallus gallus (Chicken) | PF00025;         |
| P26990     | 428927;    | ARF6 CPS1                       | ADP-ribosylation factor 6                                                                                                            | Small GTPase superfamily, Arf family               | Gallus gallus (Chicken) | PF00025;         |
| Q90965     | 396153;    | RAB2A RAB2                      | Ras-related protein Rab-2A                                                                                                           | Small GTPase superfamily, Rab family               | Gallus gallus (Chicken) | PF00071;         |
| A0A3Q2UFY8 | 424636;    | RAB3B                           | Ras-related protein Rab-3                                                                                                            | Small GTPase superfamily, Rab family               | Gallus gallus (Chicken) | PF00071;         |
| E1C8J9     | 424636;    | RAB3B                           | Ras-related protein Rab-3                                                                                                            | Small GTPase superfamily, Rab family               | Gallus gallus (Chicken) | PF00071;         |
| A0A1D5NWR3 | 421532;    | RAB4A                           | Ras-related protein Rab-4                                                                                                            | Small GTPase superfamily, Rab family               | Gallus gallus (Chicken) | PF00071;         |
| A0A3Q2TYP7 | 421532;    | RAB4A                           | Ras-related protein Rab-4                                                                                                            | Small GTPase superfamily, Rab family               | Gallus gallus (Chicken) | PF00071;         |
| Q5ZHW4     | 100529061; | RAB5B RCJMB04_32j11             | Ras-related protein Rab-5B (EC 3.6.5.2)                                                                                              | Small GTPase superfamily, Rab family               | Gallus gallus (Chicken) | PF00071;         |
| Q98932     | 395197;    | RAB5C                           | Ras-related protein Rab-5C (EC 3.6.5.2) (Rab5C-like protein)                                                                         | Small GTPase superfamily, Rab family               | Gallus gallus (Chicken) | PF00071;         |
| Q1KME6     | 419063;    | RAB6A                           | Ras-related protein Rab-6A                                                                                                           | Small GTPase superfamily, Rab family               | Gallus gallus (Chicken) | PF00071;         |
| Q5F470     | 428352;    | RAB8A RCJMB04_2k8               | Ras-related protein Rab-8A                                                                                                           | Small GTPase superfamily, Rab family               | Gallus gallus (Chicken) | PF00071;         |
| Q5ZM5      | 418635;    | RAB9A RCJMB04_1p1               | Uncharacterized protein                                                                                                              | Small GTPase superfamily, Rab family               | Gallus gallus (Chicken) | PF00071;         |
| Q5ZIT5     | 421994;    | RAB10 RCJMB04_23k10             | Ras-related protein Rab-10 (EC 3.6.5.2)                                                                                              | Small GTPase superfamily, Rab family               | Gallus gallus (Chicken) | PF00071;         |
| Q5ZKU5     | 417119;    | RAB14 RCJMB04_9b24              | Ras-related protein Rab-14                                                                                                           | Small GTPase superfamily, Rab family               | Gallus gallus (Chicken) | PF00071;         |
| Q5ZLG1     | 420483;    | RAB18 RCJMB04_6g4               | Ras-related protein Rab-18                                                                                                           | Small GTPase superfamily, Rab family               | Gallus gallus (Chicken) | PF00071;         |
| D2D3P4     | 415410;    | Rab27a RAB27A                   | Small monomeric GTPase (EC 3.6.5.2)                                                                                                  | Small GTPase superfamily, Rab family               | Gallus gallus (Chicken) | PF00071;         |
| F1NBL3     | 421616;    | RAB32                           | Ras-related protein Rab                                                                                                              | Small GTPase superfamily, Rab family               | Gallus gallus (Chicken) | PF00071;         |
| Q5ZHV1     | 422441;    | RAB33B RCJMB04_32p6             | Ras-related protein Rab-33B                                                                                                          | Small GTPase superfamily, Rab family               | Gallus gallus (Chicken) | PF00071;         |
| P42558     | 396193;    | RAN                             | GTP-binding nuclear protein Ran (GTPase Ran) (Ras-like protein TC4) (Ras-related nuclear protein)                                    | Small GTPase superfamily, Ran family               | Gallus gallus (Chicken) | PF00071;         |
| P08642     | 396229;    | HRAS HRAS1                      | GTPase HRas (EC 3.6.5.2) (H-Ras-1) (Transforming protein p21) (c-H-ras) (p21ras) [Cleaved into: GTPase HRas, N-terminally processed] | Small GTPase superfamily, Ras family               | Gallus gallus (Chicken) | PF00071;         |
| F1NSA8     | 419867;    | RAP1A                           | Uncharacterized protein                                                                                                              | Small GTPase superfamily, Ras family               | Gallus gallus (Chicken) | PF00071;         |
| Q5ZHX1     | 417840;    | RAP1B RCJMB04_32g9 RCJMB04_4h13 | Ras-related protein Rap-1b (EC 3.6.5.2)                                                                                              | Small GTPase superfamily, Ras family               | Gallus gallus (Chicken) | PF00071;         |
| E1BQI2     | 769797;    | RAP2A                           | Uncharacterized protein                                                                                                              | Small GTPase superfamily, Ras family               | Gallus gallus (Chicken) | PF00071;         |

|            |         |                         |                                                                                                                                                              |                                                                         |                         |                                          |
|------------|---------|-------------------------|--------------------------------------------------------------------------------------------------------------------------------------------------------------|-------------------------------------------------------------------------|-------------------------|------------------------------------------|
| A0A1D5P1T0 | 420765; | RALA                    | Small monomeric GTPase (EC 3.6.5.2)                                                                                                                          | Small GTPase superfamily, Ras family                                    | Gallus gallus (Chicken) | PF00071;                                 |
| Q90694     | 395917; | CDC42                   | Cell division control protein 42 homolog (EC 3.6.5.2) (G25K GTP-binding protein)                                                                             | Small GTPase superfamily, Rho family, CDC42 subfamily                   | Gallus gallus (Chicken) | PF00071;                                 |
| A0A1D5PD33 | 395917; | CDC42                   | Cell division control protein 42 homolog (EC 3.6.5.2)                                                                                                        | Small GTPase superfamily, Rho family, CDC42 subfamily                   | Gallus gallus (Chicken) | PF00071;                                 |
| F1NT40     | 423711; | SAR1A                   | Uncharacterized protein                                                                                                                                      | Small GTPase superfamily, SAR1 family                                   | Gallus gallus (Chicken) | PF00025;                                 |
| Q00649     | 396227; | HSPB1                   | Heat shock protein beta-1 (HspB1) (25 kDa IAP) (Actin polymerization inhibitor) (Heat shock 25 kDa protein) (HSP 25) (Heat shock 27 kDa protein) (HSP 27)    | Small heat shock protein (HSP20) family                                 | Gallus gallus (Chicken) | PF00011;                                 |
| P28675     | 417892; | DCN                     | Decorin (Bone proteoglycan II) (PG-S2)                                                                                                                       | Small leucine-rich proteoglycan (SLRP) family, SLRP class I subfamily   | Gallus gallus (Chicken) | PF13855;PF01462;                         |
| P51890     | 417891; | LUM LDC                 | Lumican (Keratan sulfate proteoglycan lumican) (KSPG lumican)                                                                                                | Small leucine-rich proteoglycan (SLRP) family, SLRP class II subfamily  | Gallus gallus (Chicken) | PF13516;PF13855;PF01462;                 |
| Q9W6H0     | 374039; | OGN                     | Mimecan (Osteoglycin)                                                                                                                                        | Small leucine-rich proteoglycan (SLRP) family, SLRP class III subfamily | Gallus gallus (Chicken) | PF13306;PF13855;                         |
| Q90988     | 396156; | SMC2 SCII SMC2L1        | Structural maintenance of chromosomes protein 2 (SMC protein 2) (SMC-2) (Chromosome scaffold protein ScII)                                                   | SMC family, SMC2 subfamily                                              | Gallus gallus (Chicken) | PF06470;PF02463;                         |
| Q8AWB7     | 395187; | SMC1                    | Structural maintenance of chromosomes protein                                                                                                                | SMC family, SMC family, SMC1 subfamily                                  | Gallus gallus (Chicken) | PF06470;PF02463;                         |
| Q8AWB8     | 395188; | SMC3                    | Structural maintenance of chromosomes protein                                                                                                                | SMC family, SMC family, SMC3 subfamily                                  | Gallus gallus (Chicken) | PF06470;PF02463;                         |
| F1NDN4     | 395189; | SMC4                    | Structural maintenance of chromosomes protein                                                                                                                | SMC family, SMC family, SMC4 subfamily                                  | Gallus gallus (Chicken) | PF06470;PF02463;                         |
| E1BWS2     | 421051; | NAPG                    | Uncharacterized protein                                                                                                                                      | SNAP family                                                             | Gallus gallus (Chicken) |                                          |
| E1BRL4     | 423235; | SNAP23                  | Synaptosomal-associated protein                                                                                                                              | SNAP-25 family                                                          | Gallus gallus (Chicken) | PF00835;                                 |
| A0A3S5ZP89 | 422457; | SMARCA5                 | Uncharacterized protein                                                                                                                                      | SNF2/RAD54 helicase family, ISWI subfamily                              | Gallus gallus (Chicken) | PF13892;PF09110;PF00271;PF09111;PF00176; |
| Q5ZL55     | 428673; | CHMP6 RCJMB04_7k13      | Charged multivesicular body protein 6 (Chromatin-modifying protein 6)                                                                                        | SNF7 family                                                             | Gallus gallus (Chicken) | PF03357;                                 |
| Q5ZL58     | 416947; | SNRPD3 RCJMB04_7j2      | Small nuclear ribonucleoprotein Sm D3 (Sm-D3) (snRNP core protein D3)                                                                                        | SnRNP core protein family                                               | Gallus gallus (Chicken) | PF01423;                                 |
| P62303     | 396180; | SNRPE                   | Small nuclear ribonucleoprotein E (snRNP-E) (Sm protein E) (Sm-E) (SmE)                                                                                      | SnRNP Sm proteins family                                                | Gallus gallus (Chicken) | PF01423;                                 |
| E1C8T5     | 422466; | LSM6                    | Sm domain-containing protein                                                                                                                                 | SnRNP Sm proteins family, SmF/LSm6 subfamily                            | Gallus gallus (Chicken) | PF01423;                                 |
| Q9PV94     | 395298; | SNRPB                   | Small nuclear ribonucleoprotein-associated protein B' (snRNP-B') (snRNP-B') (Sm protein B') (Sm-B') (SmB')                                                   | SnRNP SmB/SmN family                                                    | Gallus gallus (Chicken) | PF01423;                                 |
| Q5F406     | 426797; | RCJMB04_3o14            | Sorting nexin-2                                                                                                                                              | Sorting nexin family                                                    | Gallus gallus (Chicken) | PF00787;PF03700;PF09325;                 |
| Q5ZK22     | 771038; | SNX32 RCJMB04_13i2      | Sorting nexin                                                                                                                                                | Sorting nexin family                                                    | Gallus gallus (Chicken) | PF00787;PF09325;                         |
| P36377     | 386571; | SPARC                   | SPARC (Basement-membrane protein 40) (BM-40) (Osteonectin) (ON) (Secreted protein acidic and rich in cysteine)                                               | SPARC family                                                            | Gallus gallus (Chicken) | PF09289;PF00050;PF10591;                 |
| P28687     | 396234; | SPC22                   | Signal peptidase complex subunit 3 (EC 3.4.--.) (Microsomal signal peptidase 22/23 kDa subunit) (SPase 22/23 kDa subunit) (gp23)                             | SPCS3 family                                                            | Gallus gallus (Chicken) | PF04573;                                 |
| P07751     | 374234; | SPTAN1 SPTA2            | Spectrin alpha chain, non-erythrocytic 1 (Alpha-II spectrin) (Fodrin alpha chain)                                                                            | Spectrin family                                                         | Gallus gallus (Chicken) | PF13499;PF08726;PF00018;PF00435;         |
| A0A1D5P797 | 421216; | SPTBN1                  | Spectrin beta chain                                                                                                                                          | Spectrin family                                                         | Gallus gallus (Chicken) | PF00307;PF15410;PF00435;                 |
| A0A1D5PJY1 | 421216; | SPTBN1                  | Spectrin beta chain                                                                                                                                          | Spectrin family                                                         | Gallus gallus (Chicken) | PF00307;PF15410;PF00435;                 |
| A0A1D5NY06 | 771447; | SRM                     | PABS domain-containing protein                                                                                                                               | Spermidine/spermine synthase family                                     | Gallus gallus (Chicken) | PF17284;                                 |
| E1BTS4     | 419884; | BCAS2                   | Pre-mRNA-splicing factor SPF27                                                                                                                               | SPF27 family                                                            | Gallus gallus (Chicken) | PF05700;                                 |
| Q5ZML3     | 772264; | SRSF1 SFRS1 RCJMB04_1i5 | Serine/arginine-rich splicing factor 1 (Splicing factor, arginine/serine-rich 1)                                                                             | Splicing factor SR family                                               | Gallus gallus (Chicken) | PF00076;                                 |
| F1NQW8     | 772264; | SRSF1                   | Splicing factor, arginine/serine-rich 1                                                                                                                      | Splicing factor SR family                                               | Gallus gallus (Chicken) | PF00076;                                 |
| P30352     | 396195; | SRSF2 SFRS2             | Serine/arginine-rich splicing factor 2 (Protein PR264) (Splicing component, 35 kDa) (Splicing factor SC35) (SC-35) (Splicing factor, arginine/serine-rich 2) | Splicing factor SR family                                               | Gallus gallus (Chicken) | PF00076;                                 |
| Q5Zi08     | 426493; | SUPT5H RCJMB04_3j117    | Transcription elongation factor SPT5 (DRB sensitivity-inducing factor large subunit) (DSIF large subunit)                                                    | SPT5 family                                                             | Gallus gallus (Chicken) | PF00467;PF03439;PF11942;                 |
| P31395     | 396057; | STMN1 LAP18             | Stathmin                                                                                                                                                     | Stathmin family                                                         | Gallus gallus (Chicken) | PF00836;                                 |

|            |            |                          |                                                                                                                                                                                                     |                                                                                                                              |                         |                                  |
|------------|------------|--------------------------|-----------------------------------------------------------------------------------------------------------------------------------------------------------------------------------------------------|------------------------------------------------------------------------------------------------------------------------------|-------------------------|----------------------------------|
| E1BUG3     | 772063;    | STEAP4                   | Uncharacterized protein                                                                                                                                                                             | STEAP family                                                                                                                 | Gallus gallus (Chicken) | PF03807;PF01794;                 |
| Q5ZLA7     | 100857165; | STT3A RCJMB04_6o16       | Dolchyl-diphosphooligosaccharide-protein glycotransferase (EC 2.4.99.18)                                                                                                                            | STT3 family                                                                                                                  | Gallus gallus (Chicken) | PF02516;                         |
| F1NH65     | 423307;    | SCFD1                    | Uncharacterized protein                                                                                                                                                                             | STXBP/unc-18/SEC1 family                                                                                                     | Gallus gallus (Chicken) | PF00995;                         |
| A0A1D5PHU2 | 404293;    | STXBP1                   | Syntaxin-binding protein 1                                                                                                                                                                          | STXBP/unc-18/SEC1 family                                                                                                     | Gallus gallus (Chicken) | PF00995;                         |
| A0A1D5PK28 | 404293;    | STXBP1                   | Syntaxin-binding protein 1                                                                                                                                                                          | STXBP/unc-18/SEC1 family                                                                                                     | Gallus gallus (Chicken) | PF00995;                         |
| A0A1D5PIF0 | 100859720; | SDHB                     | Succinate dehydrogenase [ubiquinone] iron-sulfur subunit, mitochondrial (EC 1.3.5.1)                                                                                                                | Succinate dehydrogenase/fumarate reductase iron-sulfur protein family                                                        | Gallus gallus (Chicken) | PF13085;                         |
| A0A1D5PSE5 | 395373;    | ACLY                     | ATP-citrate synthase (EC 2.3.3.8) (ATP-citrate (pro-S)-lyase) (Citrate cleavage enzyme)                                                                                                             | Succinate/malate CoA ligase alpha subunit family; Succinate/malate CoA ligase beta subunit family                            | Gallus gallus (Chicken) | PF16114;PF00285;PF02629;PF00549; |
| Q5F3V2     | 395373;    | RCJMB04_6f14             | ATP-citrate synthase (EC 2.3.3.8) (ATP-citrate (pro-S)-lyase) (Citrate cleavage enzyme)                                                                                                             | Succinate/malate CoA ligase alpha subunit family; Succinate/malate CoA ligase beta subunit family                            | Gallus gallus (Chicken) | PF16114;PF00285;PF02629;PF00549; |
| Q5F3B9     | 418857;    | SUCLA2 RCJMB04_22i13     | Succinate-CoA ligase [ADP-forming] subunit beta, mitochondrial (EC 6.2.1.5) (ATP-specific succinyl-CoA synthetase subunit beta) (A-SCS) (Succinyl-CoA synthetase beta-A chain) (SCS-betaA)          | Succinate/malate CoA ligase alpha subunit family; Succinate/malate CoA ligase beta subunit family                            | Gallus gallus (Chicken) | PF08442;PF00549;                 |
| Q5ZL37     | 416087;    | SUCLG2 RCJMB04_7p8       | Succinate-CoA ligase [GDP-forming] subunit beta, mitochondrial (EC 6.2.1.4) (GTP-specific succinyl-CoA synthetase subunit beta) (G-SCS) (GTPSCS) (Succinyl-CoA synthetase beta-G chain) (SCS-betaG) | Succinate/malate CoA ligase alpha subunit family; Succinate/malate CoA ligase beta subunit family; GTP-specific subunit beta | Gallus gallus (Chicken) | PF08442;PF00549;                 |
| Q90WR6     | 395300;    | SULT1C SULT1C3           | Sulfotransferase (EC 2.8.2.-)                                                                                                                                                                       | Sulfotransferase 1 family                                                                                                    | Gallus gallus (Chicken) | PF00685;                         |
| Q8JG30     | 395227;    | SULT1B1 SULT1B           | Sulfotransferase family cytosolic 1B member 1 (ST1B1) (Sulfotransferase 1B1) (EC 2.8.2.-)                                                                                                           | Sulfotransferase 1 family                                                                                                    | Gallus gallus (Chicken) | PF00685;                         |
| E1BYE0     | 415852;    | LOC415852                | Sulfotransferase (EC 2.8.2.-)                                                                                                                                                                       | Sulfotransferase 1 family                                                                                                    | Gallus gallus (Chicken) | PF00685;                         |
| Q800K9     | 374273;    | SURF4 SURF-4             | Surfeit locus protein 4                                                                                                                                                                             | SURF4 family                                                                                                                 | Gallus gallus (Chicken) | PF02077;                         |
| Q5ZM80     | 419177;    | RCJMB04_2o15             | Dolchyl-diphosphooligosaccharide-protein glycosyltransferase subunit 2 (Ribophorin-2)                                                                                                               | SWP1 family                                                                                                                  | Gallus gallus (Chicken) | PF05817;                         |
| Q5ZJW4     | 424377;    | SEC22B RCJMB04_15c3      | Vesicle-trafficking protein SEC22b (SEC22 vesicle-trafficking protein homolog B)                                                                                                                    | Synaptobrevin family                                                                                                         | Gallus gallus (Chicken) | PF13774;PF00957;                 |
| Q5ZL74     | 422297;    | VAMP7 SYBL1 RCJMB04_7f19 | Vesicle-associated membrane protein 7 (Synaptobrevin-like protein 1)                                                                                                                                | Synaptobrevin family                                                                                                         | Gallus gallus (Chicken) | PF13774;PF00957;                 |
| Q5ZM48     | 100859110; | SYNGR2 RCJMB04_3c18      | Synaptogyrin                                                                                                                                                                                        | Synaptogyrin family                                                                                                          | Gallus gallus (Chicken) | PF01284;                         |
| Q5ZMP2     | 426930;    | STX7 RCJMB04_1i11        | t-SNARE coiled-coil homology domain-containing protein                                                                                                                                              | Syntaxin family                                                                                                              | Gallus gallus (Chicken) | PF05739;PF14523;                 |
| Q5Zi87     | 417334;    | TBCD RCJMB04_29e8        | Tubulin-specific chaperone D (Beta-tubulin cofactor D) (Tubulin-folding cofactor D)                                                                                                                 | TBCD family                                                                                                                  | Gallus gallus (Chicken) | PF12612;                         |
| A0A1D5NTW7 | 417334;    | TBCD                     | Tubulin-specific chaperone D                                                                                                                                                                        | TBCD family                                                                                                                  | Gallus gallus (Chicken) | PF12612;                         |
| E1BU18     | 417334;    | TBCD                     | Tubulin-specific chaperone D                                                                                                                                                                        | TBCD family                                                                                                                  | Gallus gallus (Chicken) | PF12612;                         |
| Q5F424     | 417846;    | CCT2 RCJMB04_3m3         | CCT-beta (T-complex protein 1 subunit beta)                                                                                                                                                         | TCP-1 chaperonin family                                                                                                      | Gallus gallus (Chicken) | PF00118;                         |
| Q9IBD6     | 395414;    | tcp-1 delta CCT4         | T-complex protein 1 subunit delta                                                                                                                                                                   | TCP-1 chaperonin family                                                                                                      | Gallus gallus (Chicken) | PF00118;                         |
| Q5F411     | 420930;    | CCT5 RCJMB04_3n20        | CCT-epsilon (T-complex protein 1 subunit epsilon)                                                                                                                                                   | TCP-1 chaperonin family                                                                                                      | Gallus gallus (Chicken) | PF00118;                         |
| Q5ZJ54     | 417541;    | CCT6 RCJMB04_20k5        | T-complex protein 1 subunit zeta (TCP-1-zeta) (CCT-zeta)                                                                                                                                            | TCP-1 chaperonin family                                                                                                      | Gallus gallus (Chicken) | PF00118;                         |
| F1NK38     | 428806;    | CCT7                     | T-complex protein 1 subunit eta (TCP-1-eta) (CCT-eta)                                                                                                                                               | TCP-1 chaperonin family                                                                                                      | Gallus gallus (Chicken) | PF00118;                         |
| Q6EE31     | 418486;    | CCT8                     | T-complex protein 1 subunit theta (TCP-1-theta) (CCT-theta)                                                                                                                                         | TCP-1 chaperonin family                                                                                                      | Gallus gallus (Chicken) | PF00118;                         |
| A0A1D5PZJ4 | 418486;    | CCT8                     | CCT-theta (T-complex protein 1 subunit theta)                                                                                                                                                       | TCP-1 chaperonin family                                                                                                      | Gallus gallus (Chicken) | PF00118;                         |
| Q5ZMG9     | 421586;    | TCP1 RCJMB04_2b5         | CCT-alpha (T-complex protein 1 subunit alpha)                                                                                                                                                       | TCP-1 chaperonin family                                                                                                      | Gallus gallus (Chicken) | PF00118;                         |
| P43347     | 396363;    | TPT1                     | Translationaly-controlled tumor protein homolog (TCTP) (p23) (pCHK23)                                                                                                                               | TCTP family                                                                                                                  | Gallus gallus (Chicken) | PF00838;                         |
| A0A1D5PDR0 | 424037;    | LSS                      | Terpene cyclase/mutase family member (EC 5.4.99.-)                                                                                                                                                  | Terpene cyclase/mutase family                                                                                                | Gallus gallus (Chicken) | PF13243;PF13249;                 |
| Q9IBC9     | 395527;    | CD9                      | Tetraspanin                                                                                                                                                                                         | Tetraspanin (TM4SF) family                                                                                                   | Gallus gallus (Chicken) | PF00335;                         |
| Q5F3G3     | 374256;    | RCJMB04_17m6             | Tetraspanin                                                                                                                                                                                         | Tetraspanin (TM4SF) family                                                                                                   | Gallus gallus (Chicken) | PF00335;                         |

|            |         |                       |                                                                                                                                                                                                                                                                                                               |                                                                       |                         |                                  |
|------------|---------|-----------------------|---------------------------------------------------------------------------------------------------------------------------------------------------------------------------------------------------------------------------------------------------------------------------------------------------------------|-----------------------------------------------------------------------|-------------------------|----------------------------------|
| Q5Z1I8     | 423105; | CD151 RCJMB04_25m21   | Tetraspanin                                                                                                                                                                                                                                                                                                   | Tetraspanin (TM4SF) family                                            | Gallus gallus (Chicken) | PF00335;                         |
| E1C3Y3     | 417854; | TSPAN8                | Tetraspanin                                                                                                                                                                                                                                                                                                   | Tetraspanin (TM4SF) family                                            | Gallus gallus (Chicken) | PF00335;                         |
| A0A3Q2UIT0 | 418345; | UPK1B                 | Tetraspanin                                                                                                                                                                                                                                                                                                   | Tetraspanin (TM4SF) family                                            | Gallus gallus (Chicken) | PF00335;                         |
| Q5ZHQ8     | 421119; | TCEA1 RCJMB04_34f23   | Uncharacterized protein                                                                                                                                                                                                                                                                                       | TFS-II family                                                         | Gallus gallus (Chicken) | PF08711;PF01096;PF07500;         |
| A0A1L1RWX6 | 421006; | ACOT13                | 4HBT domain-containing protein                                                                                                                                                                                                                                                                                | Thioesterase Paal family                                              | Gallus gallus (Chicken) | PF03061;                         |
| E1C0Q5     | 418968; | ACAT1                 | Uncharacterized protein                                                                                                                                                                                                                                                                                       | Thiolase-like superfamily, Thiolase family                            | Gallus gallus (Chicken) | PF02803;PF00108;                 |
| F1NT20     | 421587; | ACAT2                 | Uncharacterized protein                                                                                                                                                                                                                                                                                       | Thiolase-like superfamily, Thiolase family                            | Gallus gallus (Chicken) | PF02803;PF00108;                 |
| F1NB64     | 770094; | ACAA1                 | Uncharacterized protein                                                                                                                                                                                                                                                                                       | Thiolase-like superfamily, Thiolase family                            | Gallus gallus (Chicken) | PF02803;PF00108;                 |
| Q5ZLW8     | 426847; | RCJMB04_4j7           | Uncharacterized protein                                                                                                                                                                                                                                                                                       | Thiolase-like superfamily, Thiolase family                            | Gallus gallus (Chicken) | PF02803;PF00108;                 |
| Q07598     | 396550; | SCP2                  | Sterol carrier protein 2 (SCP-2) (Acetyl-CoA C-methyltransferase) (EC 2.3.1.155) (Non-specific lipid-transfer protein) (NSL-TP) (Propanoyl-CoA C-acyltransferase) (EC 2.3.1.176) (SCP-2/3-oxoacyl-CoA thiolase) (SCP-2/thiolase) (EC 2.3.1.16) (SCP-chi) (SCPX) (Sterol carrier protein X) (SCP-X) (Fragment) | Thiolase-like superfamily, Thiolase family                            | Gallus gallus (Chicken) | PF02036;PF02803;PF00108;         |
| P08629     | 396437; | TXN                   | Thioredoxin (Trx)                                                                                                                                                                                                                                                                                             | Thioredoxin family                                                    | Gallus gallus (Chicken) | PF00085;                         |
| F1N915     | 416077; | THOC7                 | THO complex subunit 7 homolog                                                                                                                                                                                                                                                                                 | THOC7 family                                                          | Gallus gallus (Chicken) | PF05615;                         |
| A0A1L1RIN1 | 427100; | TMCO1                 | Calcium load-activated calcium channel (CLAC channel)                                                                                                                                                                                                                                                         | TMCO1 family                                                          | Gallus gallus (Chicken) | PF01956;                         |
| Q5ZLD4     | 427663; | TMEM11 RCJMB04_6k9    | Transmembrane protein 11, mitochondrial                                                                                                                                                                                                                                                                       | TMEM11 family                                                         | Gallus gallus (Chicken) | PF14972;                         |
| Q5ZHP4     | 770339; | TPD52 RCJMB04_34n23   | Uncharacterized protein                                                                                                                                                                                                                                                                                       | TPD52 family                                                          | Gallus gallus (Chicken) | PF04201;                         |
| Q5Z193     | 419257; | TPD52L2 RCJMB04_29b18 | Uncharacterized protein                                                                                                                                                                                                                                                                                       | TPD52 family                                                          | Gallus gallus (Chicken) | PF04201;                         |
| A0A3Q2U7G4 | 417217; | DNM1                  | Dynamin GTPase (EC 3.6.5.5)                                                                                                                                                                                                                                                                                   | TRAFAC class dynamin-like GTPase superfamily, Dynamin/Fzo/YdjA family | Gallus gallus (Chicken) | PF01031;PF00350;PF02212;PF00169; |
| E1BXY4     | 417217; | DNM1                  | Dynamin GTPase (EC 3.6.5.5)                                                                                                                                                                                                                                                                                   | TRAFAC class dynamin-like GTPase superfamily, Dynamin/Fzo/YdjA family | Gallus gallus (Chicken) | PF01031;PF00350;PF02212;PF00169; |
| A0A3Q2UHM4 | 418132; | DNM1L                 | Dynamin-1-like protein (EC 3.6.5.5)                                                                                                                                                                                                                                                                           | TRAFAC class dynamin-like GTPase superfamily, Dynamin/Fzo/YdjA family | Gallus gallus (Chicken) | PF01031;PF00350;PF02212;         |
| A0A3Q3ACH0 | 418132; | DNM1L                 | Dynamin-1-like protein (EC 3.6.5.5)                                                                                                                                                                                                                                                                           | TRAFAC class dynamin-like GTPase superfamily, Dynamin/Fzo/YdjA family | Gallus gallus (Chicken) | PF01031;PF00350;PF02212;         |
| Q5F469     | 418132; | RCJMB04_2k14          | Dynamin-1-like protein (EC 3.6.5.5)                                                                                                                                                                                                                                                                           | TRAFAC class dynamin-like GTPase superfamily, Dynamin/Fzo/YdjA family | Gallus gallus (Chicken) | PF01031;PF00350;PF02212;         |
| A0A1L1RN15 | 423577; | ATL1                  | GB1/RHD3-type G domain-containing protein                                                                                                                                                                                                                                                                     | TRAFAC class dynamin-like GTPase superfamily, GB1/RHD3 GTPase family  | Gallus gallus (Chicken) | PF02263;                         |
| F1NAM6     | 423577; | ATL1                  | GB1/RHD3-type G domain-containing protein                                                                                                                                                                                                                                                                     | TRAFAC class dynamin-like GTPase superfamily, GB1/RHD3 GTPase family  | Gallus gallus (Chicken) | PF02263;                         |
| E1C3A1     | 420472; | KIF5B                 | Kinesin-like protein                                                                                                                                                                                                                                                                                          | TRAFAC class myosin-kinesin ATPase superfamily, Kinesin family        | Gallus gallus (Chicken) | PF00225;                         |
| Q5ZLA6     | 417555; | MYO1C RCJMB04_6o17    | Unconventional myosin-1c (Myosin I beta) (MMI-beta) (MMIb)                                                                                                                                                                                                                                                    | TRAFAC class myosin-kinesin ATPase superfamily, Myosin family         | Gallus gallus (Chicken) | PF00063;PF06017;                 |
| A0A1D5NWX3 | 417555; | MYO1C                 | Unconventional myosin-1c                                                                                                                                                                                                                                                                                      | TRAFAC class myosin-kinesin ATPase superfamily, Myosin family         | Gallus gallus (Chicken) | PF00063;PF06017;                 |
| F1NG39     | 417555; | MYO1C                 | Unconventional myosin-1c                                                                                                                                                                                                                                                                                      | TRAFAC class myosin-kinesin ATPase superfamily, Myosin family         | Gallus gallus (Chicken) | PF00063;PF06017;                 |
| A0A3Q2TZ02 | 419963; | MYO1D                 | Uncharacterized protein                                                                                                                                                                                                                                                                                       | TRAFAC class myosin-kinesin ATPase superfamily, Myosin family         | Gallus gallus (Chicken) | PF00063;PF06017;                 |
| A0A3Q2TZW8 | 419963; | MYO1D                 | Uncharacterized protein                                                                                                                                                                                                                                                                                       | TRAFAC class myosin-kinesin ATPase superfamily, Myosin family         | Gallus gallus (Chicken) | PF00063;PF06017;                 |
| E1C459     | 419963; | MYO1D                 | Uncharacterized protein                                                                                                                                                                                                                                                                                       | TRAFAC class myosin-kinesin ATPase superfamily, Myosin family         | Gallus gallus (Chicken) | PF00063;PF06017;                 |
| Q918D1     | 395487; | MYO6 CMY6             | Unconventional myosin-VI (Unconventional myosin-6)                                                                                                                                                                                                                                                            | TRAFAC class myosin-kinesin ATPase superfamily, Myosin family         | Gallus gallus (Chicken) | PF16521;PF00063;                 |
| A0A3Q2UDG5 | 417581; | MYO18A                | Uncharacterized protein                                                                                                                                                                                                                                                                                       | TRAFAC class myosin-kinesin ATPase superfamily, Myosin family         | Gallus gallus (Chicken) | PF00612;PF00063;PF01576;PF00595; |
| P14105     | 396469; | MYH9                  | Myosin-9 (Cellular myosin heavy chain, type A) (Myosin heavy chain 9) (Myosin heavy chain, non-muscle IIa) (Non-muscle myosin heavy chain A) (NMMHC-A) (Non-muscle myosin heavy chain IIa) (NMMHC II-a) (NMMHC-IIA)                                                                                           | TRAFAC class myosin-kinesin ATPase superfamily, Myosin family         | Gallus gallus (Chicken) | PF00063;PF02736;PF01576;         |
| Q02015     | 396465; |                       | Nonmuscle myosin heavy chain                                                                                                                                                                                                                                                                                  | TRAFAC class myosin-kinesin ATPase superfamily, Myosin family         | Gallus gallus (Chicken) | PF00612;PF00063;PF02736;PF01576; |



|            |            |                             |                                                                                                                                                                                                                                                                                                                                                                                                                                          |                                                                                                                     |                         |                                                 |
|------------|------------|-----------------------------|------------------------------------------------------------------------------------------------------------------------------------------------------------------------------------------------------------------------------------------------------------------------------------------------------------------------------------------------------------------------------------------------------------------------------------------|---------------------------------------------------------------------------------------------------------------------|-------------------------|-------------------------------------------------|
| Q789A4     | 396465;    | MYH10                       | Nonmuscle myosin heavy chain                                                                                                                                                                                                                                                                                                                                                                                                             | TRAFAC class myosin-kinesin ATPase superfamily, Myosin family                                                       | Gallus gallus (Chicken) | PF00612;PF00063;PF02736;PF01576;                |
| Q789A5     | 396465;    |                             | Nonmuscle myosin heavy chain                                                                                                                                                                                                                                                                                                                                                                                                             | TRAFAC class myosin-kinesin ATPase superfamily, Myosin family                                                       | Gallus gallus (Chicken) | PF00612;PF00063;PF02736;PF01576;                |
| Q789A6     | 396465;    | MYH10                       | Nonmuscle myosin heavy chain                                                                                                                                                                                                                                                                                                                                                                                                             | TRAFAC class myosin-kinesin ATPase superfamily, Myosin family                                                       | Gallus gallus (Chicken) | PF00612;PF00063;PF02736;PF01576;                |
| R4GIG1     | 417306;    | MYH1D                       | Uncharacterized protein                                                                                                                                                                                                                                                                                                                                                                                                                  | TRAFAC class myosin-kinesin ATPase superfamily, Myosin family                                                       | Gallus gallus (Chicken) | PF00063;PF02736;PF01576;                        |
| A0A1D5P603 | 768566;    | MYH1F                       | Uncharacterized protein                                                                                                                                                                                                                                                                                                                                                                                                                  | TRAFAC class myosin-kinesin ATPase superfamily, Myosin family                                                       | Gallus gallus (Chicken) | PF00063;PF02736;PF01576;                        |
| Q9PTY2     | 768566;    |                             | Skeletal myosin heavy chain                                                                                                                                                                                                                                                                                                                                                                                                              | TRAFAC class myosin-kinesin ATPase superfamily, Myosin family                                                       | Gallus gallus (Chicken) | PF00063;PF02736;PF01576;                        |
| Q5ZM25     | 424144;    | OLA1 RCJMB04_3f20           | Obg-like ATPase 1                                                                                                                                                                                                                                                                                                                                                                                                                        | TRAFAC class OBG-HiX-like GTPase superfamily, OBG GTPase family, YchF/OLA1 subfamily                                | Gallus gallus (Chicken) | PF01926;PF06071;                                |
| Q5F3X4     | 428281;    | EFTUD2 SNRP116 RCJMB04_4m11 | 116 kDa U5 small nuclear ribonucleoprotein component (Elongation factor Tu GTP-binding domain protein 2) (U5 snRNP-specific protein, 116 kDa)                                                                                                                                                                                                                                                                                            | TRAFAC class translation factor GTPase superfamily, Classic translation factor GTPase family, EF-G/EF-2 subfamily   | Gallus gallus (Chicken) | PF00679;PF14492;PF03764;PF16004;PF0009;PF03144; |
| Q90705     | 396325;    | EEF2                        | Elongation factor 2 (EF-2)                                                                                                                                                                                                                                                                                                                                                                                                               | TRAFAC class translation factor GTPase superfamily, Classic translation factor GTPase family, EF-G/EF-2 subfamily   | Gallus gallus (Chicken) | PF00679;PF14492;PF03764;PF00009;PF03144;        |
| Q90835     | 373963;    | EEF1A                       | Elongation factor 1-alpha 1 (EF-1-alpha-1) (Elongation factor Tu) (EF-Tu)                                                                                                                                                                                                                                                                                                                                                                | TRAFAC class translation factor GTPase superfamily, Classic translation factor GTPase family, EF-Tu/EF-1A subfamily | Gallus gallus (Chicken) | PF00009;PF03144;PF03143;                        |
| Q5ZMS3     | 418597;    | EIF2S3 RCJMB04_1f8          | Eukaryotic translation initiation factor 2 subunit 3 (EC 3.6.5.3) (Eukaryotic translation initiation factor 2 subunit gamma) (eIF-2-gamma)                                                                                                                                                                                                                                                                                               | TRAFAC class translation factor GTPase superfamily, Classic translation factor GTPase family, EIF2G subfamily       | Gallus gallus (Chicken) | PF09173;PF00009;PF03144;                        |
| E1C3D2     | 424843;    | SEPT2                       | Septin                                                                                                                                                                                                                                                                                                                                                                                                                                   | TRAFAC class TrmE-Era-EngA-EngB-Septin-like GTPase superfamily, Septin GTPase family                                | Gallus gallus (Chicken) | PF00735;                                        |
| Q5ZMH1     | 416777;    | SEPTIN2 SEPT2 RCJMB04_2a21  | Septin-2                                                                                                                                                                                                                                                                                                                                                                                                                                 | TRAFAC class TrmE-Era-EngA-EngB-Septin-like GTPase superfamily, Septin GTPase family                                | Gallus gallus (Chicken) | PF00735;                                        |
| Q5ZM42     | 422369;    | RCJMB04_3d14                | Septin                                                                                                                                                                                                                                                                                                                                                                                                                                   | TRAFAC class TrmE-Era-EngA-EngB-Septin-like GTPase superfamily, Septin GTPase family                                | Gallus gallus (Chicken) | PF00735;                                        |
| Q5F3T3     | 420741;    | RCJMB04_7k16                | Septin                                                                                                                                                                                                                                                                                                                                                                                                                                   | TRAFAC class TrmE-Era-EngA-EngB-Septin-like GTPase superfamily, Septin GTPase family                                | Gallus gallus (Chicken) | PF00735;                                        |
| A0A3Q2U387 | 416333;    | SEPTIN8                     | Septin                                                                                                                                                                                                                                                                                                                                                                                                                                   | TRAFAC class TrmE-Era-EngA-EngB-Septin-like GTPase superfamily, Septin GTPase family                                | Gallus gallus (Chicken) | PF00735;                                        |
| Q5F3T2     | 417347;    | SEPTIN9 RCJMB04_7k22        | Septin-type G domain-containing protein                                                                                                                                                                                                                                                                                                                                                                                                  | TRAFAC class TrmE-Era-EngA-EngB-Septin-like GTPase superfamily, Septin GTPase family                                | Gallus gallus (Chicken) | PF00735;                                        |
| A0A1D5PJ5  | 422635;    | SEPTIN11                    | Septin                                                                                                                                                                                                                                                                                                                                                                                                                                   | TRAFAC class TrmE-Era-EngA-EngB-Septin-like GTPase superfamily, Septin GTPase family                                | Gallus gallus (Chicken) | PF00735;                                        |
| F1P0X3     | 422635;    | SEPTIN11                    | Septin                                                                                                                                                                                                                                                                                                                                                                                                                                   | TRAFAC class TrmE-Era-EngA-EngB-Septin-like GTPase superfamily, Septin GTPase family                                | Gallus gallus (Chicken) | PF00735;                                        |
| Q8AXQ0     | 378918;    | TRAM                        | Translocating chain-associated membrane protein                                                                                                                                                                                                                                                                                                                                                                                          | TRAM family                                                                                                         | Gallus gallus (Chicken) | PF08390;PF03798;                                |
| Q5ZKN8     | 423019;    | RCJMB04_9n21                | Transaldolase (EC 2.2.1.2)                                                                                                                                                                                                                                                                                                                                                                                                               | Transaldolase family, Type 1 subfamily                                                                              | Gallus gallus (Chicken) | PF00923;                                        |
| Q6DV79     | 420027;    | STAT3 RCJMB04_38f20         | Signal transducer and activator of transcription 3                                                                                                                                                                                                                                                                                                                                                                                       | Transcription factor STAT family                                                                                    | Gallus gallus (Chicken) | PF00017;PF01017;PF02864;PF02865;                |
| A0A1D5P521 | 107055444; | LOC107055444                | Activated RNA polymerase II transcriptional coactivator p15 (SUB1 homolog)                                                                                                                                                                                                                                                                                                                                                               | Transcriptional coactivator PC4 family                                                                              | Gallus gallus (Chicken) | PF02229;                                        |
| F1NYN9     | 769292;    | GMPPA                       | NTP_transferase domain-containing protein                                                                                                                                                                                                                                                                                                                                                                                                | Transferase hexapeptide repeat family                                                                               | Gallus gallus (Chicken) | PF00132;PF00483;                                |
| F1P574     | 415924;    | GMPPB                       | NTP_transferase domain-containing protein                                                                                                                                                                                                                                                                                                                                                                                                | Transferase hexapeptide repeat family                                                                               | Gallus gallus (Chicken) | PF00132;PF00483;                                |
| P02789     | 396241;    |                             | Ovotransferrin (Allergen Gal d III) (Conalbumin) (Serum transferrin) (allergen Gal d 3)                                                                                                                                                                                                                                                                                                                                                  | Transferrin family                                                                                                  | Gallus gallus (Chicken) | PF00405;                                        |
| Q9DER6     | 395420;    |                             | Coagulation factor XIIIa                                                                                                                                                                                                                                                                                                                                                                                                                 | Transglutaminase superfamily, Transglutaminase family                                                               | Gallus gallus (Chicken) | PF00927;PF01841;PF00868;                        |
| E1BQZ4     | 419216;    | EPB42                       | TGc domain-containing protein                                                                                                                                                                                                                                                                                                                                                                                                            | Transglutaminase superfamily, Transglutaminase family                                                               | Gallus gallus (Chicken) | PF00927;PF01841;PF00868;                        |
| Q01841     | 396432;    | TGM2                        | Protein-glutamine gamma-glutamyltransferase 2 (EC 2.3.2.13) (Erythrocyte transglutaminase) (Isopeptidase TGM2) (EC 3.4.-.-) (Protein-glutamine deamidase TGM2) (EC 3.5.1.44) (Protein-glutamine dopaminyltransferase TGM2) (EC 2.3.1.-) (Protein-glutamine histaminyltransferase TGM2) (EC 2.3.1.-) (Protein-glutamine noradrenalinyltransferase TGM2) (EC 2.3.1.-) (Protein-glutamine serotoninyltransferase TGM2) (EC 2.3.1.-) (Tissue | Transglutaminase superfamily, Transglutaminase family                                                               | Gallus gallus (Chicken) | PF00927;PF01841;PF00868;                        |
| Q5ZK99     | 420706;    | RCJMB04_12c19               | TGc domain-containing protein                                                                                                                                                                                                                                                                                                                                                                                                            | Transglutaminase superfamily, Transglutaminase family                                                               | Gallus gallus (Chicken) | PF00927;PF01841;PF00868;                        |
| P79769     | 395955;    | TSN                         | Translin (EC 3.1.-.-) (Component 3 of promoter of RISC) (C3PO)                                                                                                                                                                                                                                                                                                                                                                           | Translin family                                                                                                     | Gallus gallus (Chicken) | PF01997;                                        |
| E1BYF1     | 424716;    | CTH                         | Cystathionine gamma-lyase (EC 4.4.1.1) (Cysteine-protein sulfhydryase) (Gamma-cystathionase)                                                                                                                                                                                                                                                                                                                                             | Trans-sulfuration enzymes family                                                                                    | Gallus gallus (Chicken) | PF01053;                                        |
| P27731     | 396277;    | TTR                         | Transthyretin (Prealbumin) (TBPA)                                                                                                                                                                                                                                                                                                                                                                                                        | Transthyretin family                                                                                                | Gallus gallus (Chicken) | PF00576;                                        |
| A0A1I7Q422 | 396277;    | TTR                         | Transthyretin                                                                                                                                                                                                                                                                                                                                                                                                                            | Transthyretin family                                                                                                | Gallus gallus (Chicken) | PF00576;                                        |

|            |            |                          |                                                                                                                 |                                                       |                         |                                                  |
|------------|------------|--------------------------|-----------------------------------------------------------------------------------------------------------------|-------------------------------------------------------|-------------------------|--------------------------------------------------|
| Q5ZM63     | 420871;    | RCJMB04_2p21             | Signal sequence receptor subunit alpha (Translocon-associated protein subunit alpha)                            | TRAP-alpha family                                     | Gallus gallus (Chicken) | PF03896;                                         |
| Q5ZHS6     | 419788;    | RCJMB04_33k2             | Trafficking protein particle complex subunit                                                                    | TRAPP small subunits family                           | Gallus gallus (Chicken) | PF04099;                                         |
| Q5Zi57     | 419625;    | TRAPPC3<br>RCJMB04_30c23 | Trafficking protein particle complex subunit 3                                                                  | TRAPP small subunits family, BET3 subfamily           | Gallus gallus (Chicken) | PF04051;                                         |
| Q5F359     | 100858483; | TRAPPC5<br>RCJMB04_33f11 | Trafficking protein particle complex subunit 5                                                                  | TRAPP small subunits family, BET3 subfamily           | Gallus gallus (Chicken) | PF04051;                                         |
| Q5Zi89     | 428748;    | TRAPPC11<br>RCJMB04_29e4 | Trafficking protein particle complex subunit 11                                                                 | TRAPPC11 family                                       | Gallus gallus (Chicken) | PF11817;PF12742;                                 |
| P00940     | 396435;    | TP11                     | Triosephosphate isomerase (TIM) (EC 5.3.1.1) (Methylglyoxal synthase) (EC 4.2.3.3) (Triose-phosphate isomerase) | Triosephosphate isomerase family                      | Gallus gallus (Chicken) | PF00121;                                         |
| A0A1D5P668 | 416103;    | TRNT1                    | Uncharacterized protein                                                                                         | TRNA nucleotidyltransferase/poly(A) polymerase family | Gallus gallus (Chicken) | PF01743;PF12627;                                 |
| P04268     | 396366;    | TPM1                     | Tropomyosin alpha-1 chain (Alpha-tropomyosin) (Tropomyosin-1)                                                   | Tropomyosin family                                    | Gallus gallus (Chicken) | PF00261;                                         |
| A0A1D5P342 | 396366;    | TPM1                     | Tropomyosin alpha-1 chain                                                                                       | Tropomyosin family                                    | Gallus gallus (Chicken) | PF00261;                                         |
| A0A1L1RU52 | 396366;    | TPM1                     | Tropomyosin alpha-1 chain                                                                                       | Tropomyosin family                                    | Gallus gallus (Chicken) | PF00261;                                         |
| A0A452J839 | 396366;    | TPM1                     | Tropomyosin alpha-1 chain                                                                                       | Tropomyosin family                                    | Gallus gallus (Chicken) | PF00261;                                         |
| Q8AWI4     | 396366;    |                          | Alpha-tropomyosin 2                                                                                             | Tropomyosin family                                    | Gallus gallus (Chicken) | PF00261;                                         |
| Q91005     | 396366;    | alpha-FTM                | Alpha tropomyosin of brain                                                                                      | Tropomyosin family                                    | Gallus gallus (Chicken) | PF00261;                                         |
| P19352     | 396430;    | TPM2                     | Tropomyosin beta chain (Beta-tropomyosin) (Tropomyosin-2)                                                       | Tropomyosin family                                    | Gallus gallus (Chicken) | PF00261;                                         |
| Q05705     | 396430;    | BRT-2                    | Beta-tropomyosin                                                                                                | Tropomyosin family                                    | Gallus gallus (Chicken) | PF00261;                                         |
| Q05706     | 396430;    | BRT-1 TPM2               | Beta-tropomyosin (Tropomyosin beta chain)                                                                       | Tropomyosin family                                    | Gallus gallus (Chicken) | PF00261;                                         |
| H9L074     | 770103;    | TPM3                     | Uncharacterized protein                                                                                         | Tropomyosin family                                    | Gallus gallus (Chicken) | PF00261;                                         |
| H9L3K0     | 770103;    | TPM3                     | Tropomyosin 3 alpha isoform                                                                                     | Tropomyosin family                                    | Gallus gallus (Chicken) | PF00261;                                         |
| Q5ZLJ7     | 770103;    | TPM3 RCJMB04_5n23        | Uncharacterized protein                                                                                         | Tropomyosin family                                    | Gallus gallus (Chicken) | PF00261;                                         |
| F1NK75     | 107055375; | TPM4                     | Uncharacterized protein                                                                                         | Tropomyosin family                                    | Gallus gallus (Chicken) | PF00261;                                         |
| F1NZA2     | 418226;    | TSPO                     | Uncharacterized protein                                                                                         | TspO/BZRP family                                      | Gallus gallus (Chicken) | PF03073;                                         |
| F1NNL8     | 419914;    | TSPO2                    | Uncharacterized protein                                                                                         | TspO/BZRP family                                      | Gallus gallus (Chicken) | PF03073;                                         |
| F1P5B0     | 416694;    | TUBAL3                   | Tubulin alpha chain                                                                                             | Tubulin family                                        | Gallus gallus (Chicken) | PF00091;PF03953;                                 |
| P09207     | 396427;    |                          | Tubulin beta-6 chain (Beta-tubulin class-VI)                                                                    | Tubulin family                                        | Gallus gallus (Chicken) | PF00091;PF03953;                                 |
| P32882     | 420883;    |                          | Tubulin beta-2 chain (Beta-tubulin class-II)                                                                    | Tubulin family                                        | Gallus gallus (Chicken) | PF00091;PF03953;                                 |
| P09652     | 431043;    |                          | Tubulin beta-4 chain (Beta-tubulin class-III)                                                                   | Tubulin family                                        | Gallus gallus (Chicken) | PF00091;PF03953;                                 |
| F1NYB1     | 417255;    | TUBB4B                   | Tubulin beta chain                                                                                              | Tubulin family                                        | Gallus gallus (Chicken) | PF00091;PF03953;                                 |
| P09653     | 421037;    |                          | Tubulin beta-5 chain (Beta-tubulin class-V)                                                                     | Tubulin family                                        | Gallus gallus (Chicken) | PF00091;PF03953;                                 |
| P09244     | 396254;    |                          | Tubulin beta-7 chain (Tubulin beta 4')                                                                          | Tubulin family                                        | Gallus gallus (Chicken) | PF00091;PF03953;                                 |
| A0A1D5PAR5 | 421169;    | TUBA3E                   | Tubulin alpha chain                                                                                             | Tubulin family                                        | Gallus gallus (Chicken) | PF00091;PF03953;                                 |
| P08070     | 396426;    |                          | Tubulin alpha-2 chain (Testis-specific)                                                                         | Tubulin family                                        | Gallus gallus (Chicken) | PF00091;PF03953;                                 |
| P79994     | 396004;    |                          | DNA topoisomerase I (EC 5.6.2.1) (DNA topoisomerase 1)                                                          | Type IB topoisomerase family                          | Gallus gallus (Chicken) | PF14370;PF01028;PF02919;                         |
| Q42131     | 395966;    | TOP2B                    | DNA topoisomerase 2-beta (EC 5.6.2.2) (DNA topoisomerase II, beta isozyme)                                      | Type II topoisomerase family                          | Gallus gallus (Chicken) | PF00204;PF00521;PF08070;PF02518;PF01751;PF16898; |
| A0A3Q2U225 | 395966;    | TOP2B                    | DNA topoisomerase 2 (EC 5.6.2.2)                                                                                | Type II topoisomerase family                          | Gallus gallus (Chicken) | PF00204;PF00521;PF08070;PF02518;PF01751;PF16898; |

|            |                   |                     |                                                                                                                                                                                                                                   |                                                            |                                             |                                                  |
|------------|-------------------|---------------------|-----------------------------------------------------------------------------------------------------------------------------------------------------------------------------------------------------------------------------------|------------------------------------------------------------|---------------------------------------------|--------------------------------------------------|
| E1BZ19     | 395966;           | TOP2B               | DNA topoisomerase 2 (EC 5.6.2.2)                                                                                                                                                                                                  | Type II topoisomerase family                               | Gallus gallus (Chicken)                     | PF00204;PF00521;PF08070;PF02518;PF01751;PF16898; |
| P20785     | 396000;           | COL6A1              | Collagen alpha-1(VI) chain                                                                                                                                                                                                        | Type VI collagen family                                    | Gallus gallus (Chicken)                     | PF01391;PF00092;                                 |
| P15988     | 396292;           | COL6A2              | Collagen alpha-2(VI) chain                                                                                                                                                                                                        | Type VI collagen family                                    | Gallus gallus (Chicken)                     | PF01391;PF00092;                                 |
| Q5ZKP1     | 415523;           | RCJMB04_9n8         | LRRcap domain-containing protein                                                                                                                                                                                                  | U2 small nuclear ribonucleoprotein A family                | Gallus gallus (Chicken)                     |                                                  |
| Q8QGH2     | 373930;           | SUMO1 RCJMB04_2j18  | Small ubiquitin-related modifier 1 (SUMO-1)                                                                                                                                                                                       | Ubiquitin family, SUMO subfamily                           | Gallus gallus (Chicken)                     | PF11976;                                         |
| P79781     | 395796;           | RPS27A UBA80        | Ubiquitin-40S ribosomal protein S27a (Ubiquitin carboxyl extension protein 80) [Cleaved into: Ubiquitin; 40S ribosomal protein S27a]                                                                                              | Ubiquitin family; Eukaryotic ribosomal protein eS31 family | Gallus gallus (Chicken)                     | PF01599;PF00240;                                 |
| A0A3Q2U7Y4 | 101750090;        | SAE1                | ThiF domain-containing protein                                                                                                                                                                                                    | Ubiquitin-activating E1 family                             | Gallus gallus (Chicken)                     | PF00899;                                         |
| F1P226     | 415784;           | UBA2                | SUMO-activating enzyme subunit 2 (EC 2.3.2.-)                                                                                                                                                                                     | Ubiquitin-activating E1 family                             | Gallus gallus (Chicken)                     | PF00899;PF14732;PF16195;                         |
| Q5ZKH7     | 415784;           | RCJMB04_10i24       | ThiF domain-containing protein                                                                                                                                                                                                    | Ubiquitin-activating E1 family                             | Gallus gallus (Chicken)                     | PF00899;                                         |
| E1BT61     | 426073;           | UBA3                | NEDD8-activating enzyme E1 catalytic subunit (EC 6.2.1.64)                                                                                                                                                                        | Ubiquitin-activating E1 family, UBA3 subfamily             | Gallus gallus (Chicken)                     | PF08825;PF00899;                                 |
| Q5ZL17     | 416678;           | UBE2H RCJMB04_5p24  | UBC core domain-containing protein                                                                                                                                                                                                | Ubiquitin-conjugating enzyme family                        | Gallus gallus (Chicken)                     | PF00179;                                         |
| P63283     | 374123;           | UBE2I UBC9 UBC9     | SUMO-conjugating enzyme UBC9 (EC 2.3.2.-) (RING-type E3 SUMO transferase UBC9) (SUMO-protein ligase) (Ubiquitin carrier protein 9) (Ubiquitin carrier protein I) (Ubiquitin-conjugating enzyme E2 I) (Ubiquitin-protein ligase I) | Ubiquitin-conjugating enzyme family                        | Gallus gallus (Chicken)                     | PF00179;                                         |
| Q5ZIL3     | 428787;           | UBE2K RCJMB04_25e17 | E2 ubiquitin-conjugating enzyme (EC 2.3.2.23)                                                                                                                                                                                     | Ubiquitin-conjugating enzyme family                        | Gallus gallus (Chicken)                     | PF00627;PF00179;                                 |
| Q5ZKN7     | 416769;           | RCJMB04_9n22        | UBC core domain-containing protein                                                                                                                                                                                                | Ubiquitin-conjugating enzyme family                        | Gallus gallus (Chicken)                     | PF00179;                                         |
| Q5F405     | 417898;           | RCJMB04_3o20        | UBC core domain-containing protein                                                                                                                                                                                                | Ubiquitin-conjugating enzyme family                        | Gallus gallus (Chicken)                     | PF00179;                                         |
| Q90879     | 100538349;        | UBE2V1              | Ubiquitin-conjugating enzyme E2 variant 1 (UEV-1) (CROC-1B)                                                                                                                                                                       | Ubiquitin-conjugating enzyme family                        | Gallus gallus (Chicken)                     | PF00179;                                         |
| Q5F3Z3     | 421109;           | UBE2V2 RCJMB04_4b12 | Ubiquitin-conjugating enzyme E2 variant 2                                                                                                                                                                                         | Ubiquitin-conjugating enzyme family                        | Gallus gallus (Chicken)                     | PF00179;                                         |
| Q5F3T9     | 422792;           | UGDH RCJMB04_7d7    | UDP-glucose 6-dehydrogenase (UDP-Glc dehydrogenase) (UDP-GlcDH) (UDPGDH) (EC 1.1.1.22)                                                                                                                                            | UDP-glucose/GDP-mannose dehydrogenase family               | Gallus gallus (Chicken)                     | PF00984;PF03720;PF03721;                         |
| A0A1D5P0A1 | 373900;           | UGP2                | UTP-glucose-1-phosphate uridylyltransferase (EC 2.7.7.9)                                                                                                                                                                          | UDPGP type 1 family                                        | Gallus gallus (Chicken)                     | PF01704;                                         |
| A0A1L1RP39 | 373900;           | UGP2                | UTP-glucose-1-phosphate uridylyltransferase (EC 2.7.7.9)                                                                                                                                                                          | UDPGP type 1 family                                        | Gallus gallus (Chicken)                     | PF01704;                                         |
| Q5ZKW4     | 373900;           | RCJMB04_8o6         | UTP-glucose-1-phosphate uridylyltransferase (EC 2.7.7.9)                                                                                                                                                                          | UDPGP type 1 family                                        | Gallus gallus (Chicken)                     | PF01704;                                         |
| Q98UC3     | 374186;           | Ufd1l UFD1L         | Ubiquitin fusion-degradation 1-like protein                                                                                                                                                                                       | UFD1 family                                                | Gallus gallus (Chicken)                     | PF03152;                                         |
| F6SU35     | 419895;           | RPL10A              | Ribosomal protein                                                                                                                                                                                                                 | Universal ribosomal protein uL1 family                     | Gallus gallus (Chicken)                     | PF00687;                                         |
| P47826     | 395835;           | RPLP0               | 60S acidic ribosomal protein P0 (60S ribosomal protein L10E)                                                                                                                                                                      | Universal ribosomal protein uL10 family                    | Gallus gallus (Chicken)                     | PF00466;PF17777;                                 |
| E1BTG1     | 417264;           | RPL12               | 60S ribosomal protein L12                                                                                                                                                                                                         | Universal ribosomal protein uL11 family                    | Gallus gallus (Chicken)                     | PF00298;PF03946;                                 |
| Q7ZUR9     | 560828;           | rpl13a              | 60S ribosomal protein L13a                                                                                                                                                                                                        | Universal ribosomal protein uL13 family                    | Danio rerio (Zebrafish) (Brachydanio rerio) | PF00572;                                         |
| E1BY89     | 420001;           | RPL23               | 60S ribosomal protein L23                                                                                                                                                                                                         | Universal ribosomal protein uL14 family                    | Gallus gallus (Chicken)                     | PF00238;                                         |
| F1NBX4     | 770018;           | RPL27A              | 60S ribosomal protein L27a                                                                                                                                                                                                        | Universal ribosomal protein uL15 family                    | Gallus gallus (Chicken)                     | PF00828;                                         |
| A0A1D5PR40 | 107049046;426845; | LOC107049046 RPL17  | 60S ribosomal protein L17                                                                                                                                                                                                         | Universal ribosomal protein uL22 family                    | Gallus gallus (Chicken)                     | PF00237;                                         |
| E1BS06     | 417574;           | RPL23A              | Ribosomal_L23eN domain-containing protein                                                                                                                                                                                         | Universal ribosomal protein uL23 family                    | Gallus gallus (Chicken)                     | PF00276;PF03939;                                 |
| F224K6     | 396400;           | RPL26L1             | KOW domain-containing protein                                                                                                                                                                                                     | Universal ribosomal protein uL24 family                    | Gallus gallus (Chicken)                     | PF00467;PF16906;                                 |
| Q5ZJZ2     | 418016;           | RPL3 RCJMB04_14e22  | Uncharacterized protein                                                                                                                                                                                                           | Universal ribosomal protein uL3 family                     | Gallus gallus (Chicken)                     | PF00297;                                         |
| Q5ZJ56     | 420182;           | RPL7 RCJMB04_20k1   | 60S ribosomal protein L7                                                                                                                                                                                                          | Universal ribosomal protein uL30 family                    | Gallus gallus (Chicken)                     | PF00327;PF08079;                                 |
| Q5ZII1     | 415551;           | RCJMB04_25p23       | Ribos_L4_asso_C domain-containing protein                                                                                                                                                                                         | Universal ribosomal protein uL4 family                     | Gallus gallus (Chicken)                     | PF14374;PF00573;                                 |

|            |         |                              |                                                                                                                                                                                                                           |                                                     |                         |                          |
|------------|---------|------------------------------|---------------------------------------------------------------------------------------------------------------------------------------------------------------------------------------------------------------------------|-----------------------------------------------------|-------------------------|--------------------------|
| A0A1D5P3B1 | 419682; | RPL11                        | 60S ribosomal protein L11                                                                                                                                                                                                 | Universal ribosomal protein uL5 family              | Gallus gallus (Chicken) | PF00281;PF00673;         |
| A0A1D5NV11 | 425468; | RPL9                         | 60S ribosomal protein L9                                                                                                                                                                                                  | Universal ribosomal protein uL6 family              | Gallus gallus (Chicken) | PF00347;                 |
| F1NH93     | 430990; | RPS20                        | 40S ribosomal protein S20                                                                                                                                                                                                 | Universal ribosomal protein uS10 family             | Gallus gallus (Chicken) | PF00338;                 |
| Q5ZHW8     | 416275; | RPS14 RCJMB04_32i2           | Uncharacterized protein                                                                                                                                                                                                   | Universal ribosomal protein uS11 family             | Gallus gallus (Chicken) | PF00411;                 |
| F1NDC2     | 427323; | RPS23                        | 40S ribosomal protein S23                                                                                                                                                                                                 | Universal ribosomal protein uS12 family             | Gallus gallus (Chicken) | PF00164;                 |
| Q6ITC7     | 414782; | RPS13                        | 40S ribosomal protein S13                                                                                                                                                                                                 | Universal ribosomal protein uS15 family             | Gallus gallus (Chicken) | PF08069;PF00312;         |
| Q98TH5     | 419049; | cRPS11 RPS11                 | 40S ribosomal protein S11                                                                                                                                                                                                 | Universal ribosomal protein uS17 family             | Gallus gallus (Chicken) | PF00366;PF16205;         |
| P50890     | 395181; | RPSA LAMR1                   | 40S ribosomal protein SA (37 kDa laminin receptor precursor) (37LRP) (37/67 kDa laminin receptor) (LRP/LR) (67 kDa laminin receptor) (67LR) (Laminin receptor 1) (LamR) (Laminin-binding protein precursor p40) (LBP/p40) | Universal ribosomal protein uS2 family              | Gallus gallus (Chicken) | PF16122;PF00318;         |
| Q5ZJC1     | 419069; | RCJMB04_19g1                 | DNA-(apurinic or pyrimidinic site) lyase (EC 4.2.99.18)                                                                                                                                                                   | Universal ribosomal protein uS3 family              | Gallus gallus (Chicken) | PF07650;PF00189;         |
| E1C4M0     | 416544; | RPS2                         | 40S ribosomal protein S2                                                                                                                                                                                                  | Universal ribosomal protein uS5 family              | Gallus gallus (Chicken) | PF00333;PF03719;         |
| A0A3Q3A7P6 | 427675; | RPS15A                       | 40S ribosomal protein S15a                                                                                                                                                                                                | Universal ribosomal protein uS8 family              | Gallus gallus (Chicken) | PF00410;                 |
| R4GGJ0     | 417871; | RPS16                        | Uncharacterized protein                                                                                                                                                                                                   | Universal ribosomal protein uS9 family              | Gallus gallus (Chicken) | PF00380;                 |
| Q5ZJ8      | 422327; | UPRT RCJMB04_25k2            | Uracil phosphoribosyltransferase homolog                                                                                                                                                                                  | UPRTase family                                      | Gallus gallus (Chicken) |                          |
| E1BUH1     | 426223; | UROS                         | Hydroxymethylbilane hydrolyase [cyclizing] (EC 4.2.1.75) (Uroporphyrinogen-III cosynthase)                                                                                                                                | Uroporphyrinogen-III synthase family                | Gallus gallus (Chicken) | PF02602;                 |
| A0A1D5PCU0 | 418104; | ATP6V0A4                     | V-type proton ATPase subunit a                                                                                                                                                                                            | V-ATPase 116 kDa subunit family                     | Gallus gallus (Chicken) | PF01496;                 |
| A0A1D5PAJ8 | 421939; | ATP6V1C2                     | V-type proton ATPase subunit C                                                                                                                                                                                            | V-ATPase C subunit family                           | Gallus gallus (Chicken) | PF03223;                 |
| A0A1L1S0D5 | 423280; | ATP6V1D                      | V-type proton ATPase subunit D (V-type proton ATPase subunit d) (Vacuolar proton pump subunit D)                                                                                                                          | V-ATPase D subunit family                           | Gallus gallus (Chicken) | PF01813;                 |
| Q5ZKJ9     | 418162; | ATP6V1E1<br>RCJMB04_10e23    | Uncharacterized protein                                                                                                                                                                                                   | V-ATPase E subunit family                           | Gallus gallus (Chicken) | PF01991;                 |
| E1C3C6     | 417249; | ATP6V1G1                     | V-type proton ATPase subunit G                                                                                                                                                                                            | V-ATPase G subunit family                           | Gallus gallus (Chicken) | PF03179;                 |
| F1NW50     | 426199; | ATP6V1H                      | V-type proton ATPase subunit H                                                                                                                                                                                            | V-ATPase H subunit family                           | Gallus gallus (Chicken) | PF11698;PF03224;         |
| E1BVF8     | 415674; | ATP6V0D1                     | V-type proton ATPase subunit                                                                                                                                                                                              | V-ATPase V0D/AC39 subunit family                    | Gallus gallus (Chicken) | PF01992;                 |
| A0A1D5PRZ7 | 422575; | USO1                         | General vesicular transport factor p115                                                                                                                                                                                   | VDP/USO1/EDE1 family                                | Gallus gallus (Chicken) | PF18770;PF04871;PF04869; |
| Q5ZMS9     | 422575; | RCJMB04_1e12                 | General vesicular transport factor p115                                                                                                                                                                                   | VDP/USO1/EDE1 family                                | Gallus gallus (Chicken) | PF18770;PF04871;PF04869; |
| Q5ZM57     | 415539; | HACD3 PTPLAD1<br>RCJMB04_3b6 | Very-long-chain (3R)-3-hydroxyacyl-CoA dehydratase (EC 4.2.1.134) (3-hydroxyacyl-CoA dehydratase) (HACD) (Protein-tyrosine phosphatase-like A domain-containing protein 1)                                                | Very long-chain fatty acids dehydratase HACD family | Gallus gallus (Chicken) | PF04387;                 |
| O93510     | 395774; | GSN                          | Gelsolin (Actin-depolymerizing factor) (ADF) (Brevin) (Homogenin)                                                                                                                                                         | Villin/gelsolin family                              | Gallus gallus (Chicken) | PF00626;                 |
| A0A1D5PH32 | 395774; | GSN                          | Actin-depolymerizing factor (Brevin) (Gelsolin)                                                                                                                                                                           | Villin/gelsolin family                              | Gallus gallus (Chicken) | PF00626;                 |
| A0A1L1RYW9 | 395774; | GSN                          | Actin-depolymerizing factor (Brevin) (Gelsolin)                                                                                                                                                                           | Villin/gelsolin family                              | Gallus gallus (Chicken) | PF00626;                 |
| Q5ZIV9     | 420588; | SCIN RCJMB04_23d8            | Adseverin (Scinderin)                                                                                                                                                                                                     | Villin/gelsolin family                              | Gallus gallus (Chicken) | PF00626;                 |
| A0A3Q2U6D7 | 420475; | SVIL                         | HP domain-containing protein                                                                                                                                                                                              | Villin/gelsolin family                              | Gallus gallus (Chicken) | PF00626;PF02209;         |
| A0A3Q3AIZ0 | 420475; | SVIL                         | HP domain-containing protein                                                                                                                                                                                              | Villin/gelsolin family                              | Gallus gallus (Chicken) | PF00626;PF02209;         |
| E1C5U6     | 420415; | VILL                         | Villin-1                                                                                                                                                                                                                  | Villin/gelsolin family                              | Gallus gallus (Chicken) | PF00626;PF02209;         |
| E1C7M7     | 416184; | CTNNA1                       | Uncharacterized protein                                                                                                                                                                                                   | Vinculin/alpha-catenin family                       | Gallus gallus (Chicken) | PF01044;                 |
| P12003     | 396422; | VCL VINC1                    | Vinculin (Metavinculin)                                                                                                                                                                                                   | Vinculin/alpha-catenin family                       | Gallus gallus (Chicken) | PF01044;                 |
| P41366     | 418974; | VMO1                         | Vitelline membrane outer layer protein 1 (VMO-1) (VMO-I) (VMOI)                                                                                                                                                           | VMO1 family                                         | Gallus gallus (Chicken) | PF03762;                 |

|            |            |                          |                                                                                                                                                                                                                                                                      |                                                                    |                         |                                                  |
|------------|------------|--------------------------|----------------------------------------------------------------------------------------------------------------------------------------------------------------------------------------------------------------------------------------------------------------------|--------------------------------------------------------------------|-------------------------|--------------------------------------------------|
| A0A1D5PJ9  | 427050;    | VPS13A                   | Uncharacterized protein                                                                                                                                                                                                                                              | VPS13 family                                                       | Gallus gallus (Chicken) | PF09333;PF12624;PF06650;PF16908;PF16909;PF16910; |
| A0A1D5NW43 | 420021;    | VPS25                    | ESCRT-II complex subunit VPS25 (Vacuolar protein-sorting-associated protein 25)                                                                                                                                                                                      | VPS25 family                                                       | Gallus gallus (Chicken) | PF05871;                                         |
| A0A1L1RM52 | 423696;    | VPS26A                   | Uncharacterized protein                                                                                                                                                                                                                                              | VPS26 family                                                       | Gallus gallus (Chicken) | PF03643;                                         |
| Q5ZIL2     | 416867;    | VPS29 RCJMB04_25e21      | Vacuolar protein sorting-associated protein 29 (Vesicle protein sorting 29)                                                                                                                                                                                          | VPS29 family                                                       | Gallus gallus (Chicken) | PF12850;                                         |
| A0A1L1RIQ6 | 416867;    | VPS29                    | Vacuolar protein sorting-associated protein 29 (Vesicle protein sorting 29)                                                                                                                                                                                          | VPS29 family                                                       | Gallus gallus (Chicken) | PF12850;                                         |
| Q5ZL51     | 415750;    | RCJMB04_7m14             | Vacuolar protein sorting-associated protein 35                                                                                                                                                                                                                       | VPS35 family                                                       | Gallus gallus (Chicken) |                                                  |
| F1NF28     | 423608;    | WAPL                     | WAPL domain-containing protein                                                                                                                                                                                                                                       | WAPL family                                                        | Gallus gallus (Chicken) | PF07814;                                         |
| O93277     | 422842;    | WDR1                     | WD repeat-containing protein 1 (Actin-interacting protein 1) (AIP1)                                                                                                                                                                                                  | WD repeat AIP1 family                                              | Gallus gallus (Chicken) | PF12894;PF00400;                                 |
| Q5ZJ17     | 770269;    | ARPC1A RCJMB04_17n4      | Actin-related protein 2/3 complex subunit                                                                                                                                                                                                                            | WD repeat ARPC1 family                                             | Gallus gallus (Chicken) | PF00400;                                         |
| Q5Z199     | 416490;    | ARPC1B RCJMB04_28o6      | Actin-related protein 2/3 complex subunit                                                                                                                                                                                                                            | WD repeat ARPC1 family                                             | Gallus gallus (Chicken) | PF00400;                                         |
| A0A1L1RUT1 | 424823;    | COPB2                    | Coatomer subunit beta'                                                                                                                                                                                                                                               | WD repeat COPB2 family                                             | Gallus gallus (Chicken) | PF04053;PF00400;                                 |
| Q5Z160     | 416893;    | CORO1C RCJMB04_30b2      | Coronin                                                                                                                                                                                                                                                              | WD repeat coronin family                                           | Gallus gallus (Chicken) | PF08953;PF00400;                                 |
| Q5ZIB3     | 421916;    | RCJMB04_284              | WD_REPEATS_REGION domain-containing protein                                                                                                                                                                                                                          | WD repeat EIPR1 family                                             | Gallus gallus (Chicken) | PF00400;                                         |
| A0A1D5NU87 | 771345;    | EML4                     | Uncharacterized protein                                                                                                                                                                                                                                              | WD repeat EMAP family                                              | Gallus gallus (Chicken) | PF03451;PF00400;                                 |
| F1NH66     | 771345;    | EML4                     | Uncharacterized protein                                                                                                                                                                                                                                              | WD repeat EMAP family                                              | Gallus gallus (Chicken) | PF03451;PF00400;                                 |
| F1NLV4     | 419402;    | GNB1                     | WD_REPEATS_REGION domain-containing protein                                                                                                                                                                                                                          | WD repeat G protein beta family                                    | Gallus gallus (Chicken) | PF00400;                                         |
| Q5ZLB5     | 419402;    | RCJMB04_6n13             | WD_REPEATS_REGION domain-containing protein                                                                                                                                                                                                                          | WD repeat G protein beta family                                    | Gallus gallus (Chicken) | PF00400;                                         |
| E1BW98     | 424974;    | GNB4                     | WD_REPEATS_REGION domain-containing protein                                                                                                                                                                                                                          | WD repeat G protein beta family                                    | Gallus gallus (Chicken) | PF00400;                                         |
| A0A1D5P7Z5 | 418289;    | P3H3                     | WD_REPEATS_REGION domain-containing protein                                                                                                                                                                                                                          | WD repeat G protein beta family                                    | Gallus gallus (Chicken) | PF00400;                                         |
| P63247     | 417044;    | RACK1 GNB2L1             | Receptor of activated protein C kinase 1 (Guanine nucleotide-binding protein subunit beta-like protein 12.3) (Receptor for activated C kinase) (Receptor of activated protein kinase C 1) (RACK1)                                                                    | WD repeat G protein beta family, Ribosomal protein RACK1 subfamily | Gallus gallus (Chicken) | PF00400;                                         |
| Q9PTR5     | 374224;    | PAFAH1B1 LIS1            | Lissencephaly-1 homolog                                                                                                                                                                                                                                              | WD repeat LIS1/nudF family                                         | Gallus gallus (Chicken) | PF08513;PF00400;                                 |
| Q5ZMA2     | 430767;    | PRPF19 RCJMB04_2m2       | Pre-mRNA-processing factor 19 (EC 2.3.2.27) (PRP19/PSO4 homolog) (RING-type E3 ubiquitin transferase PRP19)                                                                                                                                                          | WD repeat PRP19 family                                             | Gallus gallus (Chicken) | PF08606;PF04564;PF00400;                         |
| Q9W715     | 395658;    | RBBP4 RBAP48             | Histone-binding protein RBBP4 (Chromatin assembly factor 1 subunit C) (CAF-1 subunit C) (Chromatin assembly factor I p48 subunit) (CAF-1 48 kDa subunit) (CAF-1 p48) (chtCAF-1 p48) (Retinoblastoma-binding protein 4) (RBBP-4) (Retinoblastoma-binding protein p48) | WD repeat RBAP46/RBAP48/MSI1 family                                | Gallus gallus (Chicken) | PF12265;PF00400;                                 |
| Q918G9     | 395390;    | RBBP7 RBAP46             | Histone-binding protein RBBP7 (Retinoblastoma-binding protein 7) (RBBP-7) (Retinoblastoma-binding protein p46)                                                                                                                                                       | WD repeat RBAP46/RBAP48/MSI1 family                                | Gallus gallus (Chicken) | PF12265;PF00400;                                 |
| A0A1D5NZU0 | 100859886; | SEH1L                    | Uncharacterized protein                                                                                                                                                                                                                                              | WD repeat SEC13 family                                             | Gallus gallus (Chicken) | PF00400;                                         |
| A0A1L1RK12 | 100859886; | SEH1L                    | Uncharacterized protein                                                                                                                                                                                                                                              | WD repeat SEC13 family                                             | Gallus gallus (Chicken) | PF00400;                                         |
| A0A3Q2TX69 | 423764;    | SEC31B                   | WD_REPEATS_REGION domain-containing protein                                                                                                                                                                                                                          | WD repeat SEC31 family                                             | Gallus gallus (Chicken) |                                                  |
| A0A3Q2TZ13 | 423764;    | SEC31B                   | WD_REPEATS_REGION domain-containing protein                                                                                                                                                                                                                          | WD repeat SEC31 family                                             | Gallus gallus (Chicken) |                                                  |
| Q5ZME8     | 427377;    | SMU1 RCJMB04_2e22        | WD40 repeat-containing protein SMU1 (Smu-1 suppressor of mec-8 and unc-52 protein homolog)                                                                                                                                                                           | WD repeat SMU1 family                                              | Gallus gallus (Chicken) | PF00400;                                         |
| Q5ZL33     | 418175;    | STRAP RCJMB04_7p19       | Serine-threonine kinase receptor-associated protein                                                                                                                                                                                                                  | WD repeat STRAP family                                             | Gallus gallus (Chicken) | PF00400;                                         |
| Q5ZMV7     | 415942;    | WDR82 RCJMB04_1b3        | WD repeat-containing protein 82                                                                                                                                                                                                                                      | WD repeat SWD2 family                                              | Gallus gallus (Chicken) | PF12894;PF00400;                                 |
| Q5F3K4     | 420427;    | WDR48 UAF1 RCJMB04_14o15 | WD repeat-containing protein 48 (USP1-associated factor 1)                                                                                                                                                                                                           | WD repeat WDR48 family                                             | Gallus gallus (Chicken) | PF11816;PF00400;                                 |
| P08251     | 396529;    | ATP1B1                   | Sodium/potassium-transporting ATPase subunit beta-1 (Sodium/potassium-dependent ATPase subunit beta-1)                                                                                                                                                               | X(+)/potassium ATPases subunit beta family                         | Gallus gallus (Chicken) | PF00287;                                         |
| P33879     | 396549;    | ATP1B3                   | Sodium/potassium-transporting ATPase subunit beta-3 (Sodium/potassium-dependent ATPase subunit beta-3)                                                                                                                                                               | X(+)/potassium ATPases subunit beta family                         | Gallus gallus (Chicken) | PF00287;                                         |

|            |            |                    |                                                                                                                                                                                            |                                                                                |                         |                                                          |
|------------|------------|--------------------|--------------------------------------------------------------------------------------------------------------------------------------------------------------------------------------------|--------------------------------------------------------------------------------|-------------------------|----------------------------------------------------------|
| Q5ZLN4     | 769677;    | FEN1 RCJMB04_5g12  | Flap endonuclease 1 (FEN-1) (EC 3.1.-.-) (Flap structure-specific endonuclease 1)                                                                                                          | XPG/RAD2 endonuclease family, FEN1 subfamily                                   | Gallus gallus (Chicken) | PF00867;PF00752;                                         |
| E1BV44     | 419212;    | CSE1L              | Chromosome segregation 1-like protein (Exportin-2) (Importin-alpha re-exporter)                                                                                                            | XPO2/CSE1 family                                                               | Gallus gallus (Chicken) | PF03378;PF08506;PF03810;                                 |
| P23991     | 771920;    | ADH1               | Alcohol dehydrogenase 1 (ADH-1) (EC 1.1.1.1) (Alcohol dehydrogenase I)                                                                                                                     | Zinc-containing alcohol dehydrogenase family, Class-I subfamily                | Gallus gallus (Chicken) | PF08240;PF00107;                                         |
| Q5ZK81     | 422705;    | RCJMB04_12119      | S-(hydroxymethyl)glutathione dehydrogenase (EC 1.1.1.284)                                                                                                                                  | Zinc-containing alcohol dehydrogenase family, Class-III subfamily              | Gallus gallus (Chicken) | PF08240;PF00107;                                         |
| F1P4I0     | 772289;    | CRYZ               | PKS_ER domain-containing protein                                                                                                                                                           | Zinc-containing alcohol dehydrogenase family, Quinone oxidoreductase subfamily | Gallus gallus (Chicken) | PF08240;PF00107;                                         |
| Q5ZHT3     | 772289;    | RCJMB04_33h20      | PKS_ER domain-containing protein                                                                                                                                                           | Zinc-containing alcohol dehydrogenase family, Quinone oxidoreductase subfamily | Gallus gallus (Chicken) | PF08240;PF00107;                                         |
| P79762     | 378906;    | ZP3 ZPC            | Zona pellucida sperm-binding protein 3 (Sperm receptor) (Zona pellucida C protein) (Zona pellucida glycoprotein 3) (Zp-3) [Cleaved into: Processed zona pellucida sperm-binding protein 3] | ZP domain family, ZPC subfamily                                                | Gallus gallus (Chicken) | PF00100;                                                 |
| Q5ZLX5     | 424717;    | ZRANB2 RCJMB04_46  | Zinc finger Ran-binding domain-containing protein 2                                                                                                                                        | ZRANB2 family                                                                  | Gallus gallus (Chicken) | PF00641;                                                 |
| Q5F464     | 429148;    | LPP RCJMB04_2120   | Lipoma-preferred partner homolog                                                                                                                                                           | Zyxin/ajuba family                                                             | Gallus gallus (Chicken) | PF00412;                                                 |
| Q04584     | 418300;    | ZYX                | Zyxin                                                                                                                                                                                      | Zyxin/ajuba family                                                             | Gallus gallus (Chicken) | PF00412;                                                 |
| A0A1D5PD86 | 420218;    | DECR1              | Uncharacterized protein                                                                                                                                                                    |                                                                                | Gallus gallus (Chicken) |                                                          |
| F1NG68     | 100858408; | DECR2              | Uncharacterized protein                                                                                                                                                                    |                                                                                | Gallus gallus (Chicken) |                                                          |
| F1NAM7     | 422715;    | BDH2               | Uncharacterized protein                                                                                                                                                                    |                                                                                | Gallus gallus (Chicken) |                                                          |
| F1NV37     | 421954;    | NT5C1B             | Uncharacterized protein                                                                                                                                                                    |                                                                                | Gallus gallus (Chicken) | PF06189;                                                 |
| Q5ZHQ4     | 421587;    | RCJMB04_34I5       | Thiolase_N domain-containing protein                                                                                                                                                       |                                                                                | Gallus gallus (Chicken) | PF00108;                                                 |
| A0A1D5P3M1 | 415562;    | ANP32A             | LRRcap domain-containing protein                                                                                                                                                           |                                                                                | Gallus gallus (Chicken) |                                                          |
| P42292     | 396092;    | ALCAM              | CD166 antigen (Activated leukocyte cell adhesion molecule) (BEN glycoprotein) (Protein DM-GRASP) (Protein JC7) (SC1 glycoprotein) (CD antigen CD166)                                       |                                                                                | Gallus gallus (Chicken) | PF08205;PF13895;                                         |
| Q5ZJB6     | 415926;    | RCJMB04_19g24      | Acyl-peptide hydrolase (Acylamino-acid-releasing enzyme) (Acylaminoacyl-peptidase)                                                                                                         |                                                                                | Gallus gallus (Chicken) | PF00326;                                                 |
| Q5ZJ14     | 421317;    | RCJMB04_21m6       | Uncharacterized protein                                                                                                                                                                    |                                                                                | Gallus gallus (Chicken) | PF00887;PF13897;                                         |
| Q5F420     | 422547;    | ACSL1 RCJMB04_3m22 | AMP-binding domain-containing protein                                                                                                                                                      |                                                                                | Gallus gallus (Chicken) | PF00501;                                                 |
| F1P451     | 424810;    | ACSL3              | AMP-binding domain-containing protein                                                                                                                                                      |                                                                                | Gallus gallus (Chicken) | PF00501;                                                 |
| A0A3Q2UMG1 | 418600;    | ACOT9              | Uncharacterized protein                                                                                                                                                                    |                                                                                | Gallus gallus (Chicken) |                                                          |
| F1NNU7     | 418600;    | ACOT9              | Uncharacterized protein                                                                                                                                                                    |                                                                                | Gallus gallus (Chicken) |                                                          |
| Q5F3B4     | 418600;    | RCJMB04_23c19      | Uncharacterized protein                                                                                                                                                                    |                                                                                | Gallus gallus (Chicken) |                                                          |
| Q5F434     | 415391;    | RCJMB04_3k8        | A_deaminase domain-containing protein                                                                                                                                                      |                                                                                | Gallus gallus (Chicken) | PF00962;                                                 |
| F1NRD4     | 404536;    | ADIPOQ             | C1q domain-containing protein                                                                                                                                                              |                                                                                | Gallus gallus (Chicken) | PF00386;PF01391;                                         |
| Q6QWE7     | 404536;    | ADIPOQ             | Adiponectin                                                                                                                                                                                |                                                                                | Gallus gallus (Chicken) | PF00386;PF01391;                                         |
| F1NGR5     | 415317;    | ADPGK              | Uncharacterized protein                                                                                                                                                                    |                                                                                | Gallus gallus (Chicken) | PF04587;                                                 |
| A0A1D5PV58 | 418224;    | ARFGAP3            | Arf-GAP domain-containing protein                                                                                                                                                          |                                                                                | Gallus gallus (Chicken) | PF01412;                                                 |
| F1NZX4     | 418224;    | ARFGAP3            | Uncharacterized protein                                                                                                                                                                    |                                                                                | Gallus gallus (Chicken) |                                                          |
| Q5F391     | 418224;    | RCJMB04_27o21      | Uncharacterized protein                                                                                                                                                                    |                                                                                | Gallus gallus (Chicken) |                                                          |
| A0A1D5PHC7 | 396538;    | AGRN               | Agtrin                                                                                                                                                                                     |                                                                                | Gallus gallus (Chicken) | PF00008;PF00050;PF07648;PF00053;PF00054;PF03146;PF01390; |
| A0A1L1RLW7 | 396538;    | AGRN               | Agtrin                                                                                                                                                                                     |                                                                                | Gallus gallus (Chicken) | PF00008;PF00050;PF07648;PF00053;PF00054;PF03146;PF01390; |
| A0A1D5PLE4 | 421634;    | AKAP12             | Uncharacterized protein                                                                                                                                                                    |                                                                                | Gallus gallus (Chicken) | PF03832;                                                 |

|            |         |                            |                                                                                                                                                                                                            |  |                         |                                          |
|------------|---------|----------------------------|------------------------------------------------------------------------------------------------------------------------------------------------------------------------------------------------------------|--|-------------------------|------------------------------------------|
| F1P331     | 419471; | AKR7A2                     | Aldo_ket_red domain-containing protein                                                                                                                                                                     |  | Gallus gallus (Chicken) | PF00248;                                 |
| E1BZE1     | 424956; | AHSG                       | Uncharacterized protein                                                                                                                                                                                    |  | Gallus gallus (Chicken) | PF00031;                                 |
| E1C2L5     | 769169; | ALYREF                     | RRM domain-containing protein                                                                                                                                                                              |  | Gallus gallus (Chicken) | PF13865;PF00076;                         |
| A0A1D5P0D3 | 422533; | AIMP1                      | tRNA-binding domain-containing protein                                                                                                                                                                     |  | Gallus gallus (Chicken) | PF01588;                                 |
| F1NLE7     | 422533; | AIMP1                      | tRNA-binding domain-containing protein                                                                                                                                                                     |  | Gallus gallus (Chicken) | PF01588;                                 |
| A0A1D5PF87 | 424474; | AGL                        | 4-alpha-glucanotransferase (EC 2.4.1.25) (EC 3.2.1.33) (Amylo-alpha-1,6-glucosidase) (Dextrin 6-alpha-D-glucosidase) (Glycogen debrancher) (Glycogen debranching enzyme) (Oligo-1,4-1,4-glucantransferase) |  | Gallus gallus (Chicken) | PF06202;PF14701;PF14702;PF14699;         |
| F1NX83     | 424474; | AGL                        | 4-alpha-glucanotransferase (EC 2.4.1.25) (EC 3.2.1.33) (Amylo-alpha-1,6-glucosidase) (Dextrin 6-alpha-D-glucosidase) (Glycogen debrancher) (Glycogen debranching enzyme) (Oligo-1,4-1,4-glucantransferase) |  | Gallus gallus (Chicken) | PF06202;PF14701;PF14702;PF14699;         |
| A0A3Q2U1V0 | 396311; | ANK1                       | Uncharacterized protein                                                                                                                                                                                    |  | Gallus gallus (Chicken) | PF00023;PF12796;PF00531;PF17809;PF00791; |
| A0A3Q2UAG0 | 396311; | ANK1                       | Uncharacterized protein                                                                                                                                                                                    |  | Gallus gallus (Chicken) | PF12796;PF00531;PF17809;PF00791;         |
| A0A3Q2UDZ7 | 396311; | ANK1                       | Uncharacterized protein                                                                                                                                                                                    |  | Gallus gallus (Chicken) | PF00023;PF12796;PF00531;PF17809;PF00791; |
| A0A3Q3AKQ1 | 396311; | ANK1                       | Uncharacterized protein                                                                                                                                                                                    |  | Gallus gallus (Chicken) | PF00023;PF12796;PF00531;PF17809;PF00791; |
| E1C937     | 420596; | AGR2                       | Uncharacterized protein                                                                                                                                                                                    |  | Gallus gallus (Chicken) |                                          |
| Q197X2     | 396535; | APOB                       | Apolipoprotein B                                                                                                                                                                                           |  | Gallus gallus (Chicken) | PF12491;PF06448;PF09172;PF01347;         |
| F1P1P3     | 417926; | APAF1                      | Apoptotic protease-activating factor 1 (APAF-1)                                                                                                                                                            |  | Gallus gallus (Chicken) | PF17908;PF00619;PF00931;PF00400;         |
| Q5ZK62     | 424895; | ACAP2 CENTB2 RCJMB04_12p24 | Arf-GAP with coiled-coil, ANK repeat and PH domain-containing protein 2 (Centaurin-beta-2) (Cnt-b2)                                                                                                        |  | Gallus gallus (Chicken) | PF12796;PF01412;PF00169;                 |
| A0A3Q2U396 | 424895; | ACAP2                      | Arf-GAP with coiled-coil, ANK repeat and PH domain-containing protein 2                                                                                                                                    |  | Gallus gallus (Chicken) | PF12796;PF01412;PF00169;                 |
| A0A3Q2UML5 | 424895; | ACAP2                      | Arf-GAP with coiled-coil, ANK repeat and PH domain-containing protein 2                                                                                                                                    |  | Gallus gallus (Chicken) | PF12796;PF01412;PF00169;                 |
| Q5ZJU3     | 420574; | ASNS RCJMB04_15i3          | Asparagine synthetase [glutamine-hydrolyzing] (EC 6.3.5.4) (Glutamine-dependent asparagine synthetase)                                                                                                     |  | Gallus gallus (Chicken) | PF00733;PF13537;                         |
| F1NWF6     | 420574; | ASNS                       | Asparagine synthetase [glutamine-hydrolyzing] (EC 6.3.5.4)                                                                                                                                                 |  | Gallus gallus (Chicken) | PF00733;PF13537;                         |
| P0DJJ2     | 423176; | ASTL                       | Astacin-like metalloendopeptidase (EC 3.4.-.-)                                                                                                                                                             |  | Gallus gallus (Chicken) | PF01400;PF00431;                         |
| Q5ZJX6     | 422462; | ABCE1 RCJMB04_14j19        | Uncharacterized protein                                                                                                                                                                                    |  | Gallus gallus (Chicken) | PF00005;PF00037;PF04068;                 |
| Q5ZM38     | 427269; | AUH RCJMB04_3e14           | Uncharacterized protein                                                                                                                                                                                    |  | Gallus gallus (Chicken) | PF00378;                                 |
| E1C502     | 418369; | ATG3                       | Autophagy_act_C domain-containing protein                                                                                                                                                                  |  | Gallus gallus (Chicken) | PF03987;                                 |
| P17790     | 770363; | BSG                        | Basigin (5A11 antigen) (Blood-brain barrier HT7 antigen) (Neurothelin)                                                                                                                                     |  | Gallus gallus (Chicken) |                                          |
| R4GL30     | 421880; | BAG2                       | BAG domain-containing protein                                                                                                                                                                              |  | Gallus gallus (Chicken) |                                          |
| F1NC47     | 416207; | BNIP1                      | Uncharacterized protein                                                                                                                                                                                    |  | Gallus gallus (Chicken) | PF03908;                                 |
| A0A3Q2TYT7 | 772088; | BCL2L15                    | Uncharacterized protein                                                                                                                                                                                    |  | Gallus gallus (Chicken) |                                          |
| Q8JGM8     | 395236; | BID RCJMB04_7d15           | BH3-interacting domain death agonist                                                                                                                                                                       |  | Gallus gallus (Chicken) | PF06393;                                 |
| A0A140T8G9 | 395236; | BID                        | BH3-interacting domain death agonist                                                                                                                                                                       |  | Gallus gallus (Chicken) | PF06393;                                 |
| A0A3Q2U873 | 395236; | BID                        | BH3-interacting domain death agonist                                                                                                                                                                       |  | Gallus gallus (Chicken) | PF06393;                                 |
| O42273     | 395882; | TENP                       | Protein TENP                                                                                                                                                                                               |  | Gallus gallus (Chicken) | PF02886;                                 |
| Q5ZHW3     | 423949; | BUB3 RCJMB04_32k7          | WD_REPEATS_REGION domain-containing protein                                                                                                                                                                |  | Gallus gallus (Chicken) | PF00400;                                 |
| P08641     | 415860; | CDH1                       | Cadherin-1 (Epithelial cadherin) (E-cadherin) (Liver cell adhesion molecule) (L-CAM)                                                                                                                       |  | Gallus gallus (Chicken) | PF00028;PF01049;PF08758;                 |
| E1C6M9     | 415860; | CDH1                       | Cadherin-1 (Epithelial cadherin)                                                                                                                                                                           |  | Gallus gallus (Chicken) | PF00028;PF01049;PF08758;                 |

|            |            |                             |                                                                                                 |  |                         |                                  |
|------------|------------|-----------------------------|-------------------------------------------------------------------------------------------------|--|-------------------------|----------------------------------|
| P33150     | 414849;    | CDH13                       | Cadherin-13 (Truncated cadherin) (T-cad) (T-cadherin)                                           |  | Gallus gallus (Chicken) | PF00028;PF08758;                 |
| A0A3Q2UIH0 | 416640;    | CARHSP1                     | CSD domain-containing protein                                                                   |  | Gallus gallus (Chicken) | PF00313;                         |
| Q90940     | 396352;    | P22                         | Calcium-binding protein                                                                         |  | Gallus gallus (Chicken) | PF13460;                         |
| F1P596     | 416692;    | CALML3                      | Uncharacterized protein                                                                         |  | Gallus gallus (Chicken) | PF13499;                         |
| A5AA28     | 395956;    | GLI2                        | GLI-Kruppel family member (Fragment)                                                            |  | Gallus gallus (Chicken) |                                  |
| O42184     | 395784;    | CLIP1 RSN                   | CAP-Gly domain-containing linker protein 1 (Cytoplasmic linker protein 170) (CLIP-170) (Restin) |  | Gallus gallus (Chicken) | PF01302;PF16641;                 |
| D3KCC4     | 100359387; | CARNS1 ATPGD1               | Carnosine synthase 1 (EC 6.3.2.11) (ATP-grasp domain-containing protein 1)                      |  | Gallus gallus (Chicken) | PF18130;                         |
| A0A1D5P2L6 | 395992;    | CRTAP                       | Cartilage-associated protein                                                                    |  | Gallus gallus (Chicken) |                                  |
| O42395     | 395731;    | CNBP ZNF9                   | Cellular nucleic acid-binding protein (CNBP) (Zinc finger protein 9)                            |  | Gallus gallus (Chicken) | PF00098;                         |
| A0A1D6UPT3 | 395731;    | CNBP                        | Cellular nucleic acid-binding protein                                                           |  | Gallus gallus (Chicken) | PF00098;                         |
| O57348     | 395731;    |                             | Cellular nucleic acid binding protein                                                           |  | Gallus gallus (Chicken) | PF00098;                         |
| A0A3Q2ULT8 | 419852;    | CD55                        | Uncharacterized protein                                                                         |  | Gallus gallus (Chicken) | PF00084;                         |
| A0A1L1RR39 | 415315;    | CD276                       | Uncharacterized protein                                                                         |  | Gallus gallus (Chicken) | PF08205;PF07686;                 |
| A0A1D5P2L5 | 422763;    | CWH43                       | Uncharacterized protein                                                                         |  | Gallus gallus (Chicken) |                                  |
| A0A3Q2TXL1 | 422763;    | CWH43                       | Uncharacterized protein                                                                         |  | Gallus gallus (Chicken) |                                  |
| A0A1D5PIH8 | 419138;    | CEP250                      | Uncharacterized protein                                                                         |  | Gallus gallus (Chicken) |                                  |
| A0A1D5PEX8 | 395355;    | CBX3                        | Uncharacterized protein                                                                         |  | Gallus gallus (Chicken) | PF00385;PF01393;                 |
| O93481     | 395355;    | CBX3                        | Chromobox protein (CHCB2)                                                                       |  | Gallus gallus (Chicken) | PF00385;PF01393;                 |
| F1NY09     | 419001;    | C1H11ORF54                  | DUF1907 domain-containing protein                                                               |  | Gallus gallus (Chicken) | PF08925;                         |
| A0A1D5NV95 | 416531;    | CHTF18                      | AAA domain-containing protein                                                                   |  | Gallus gallus (Chicken) | PF00004;                         |
| Q5ZHX0     | 416531;    | RCJMB04_32h3                | AAA domain-containing protein (Fragment)                                                        |  | Gallus gallus (Chicken) | PF00004;                         |
| Q5ZM53     | 416240;    | RCJMB04_3c5                 | ENTH domain-containing protein                                                                  |  | Gallus gallus (Chicken) | PF01417;                         |
| Q5F4A0     | 421595;    | CSTF3 RCJMB04_1m7           | Suf domain-containing protein                                                                   |  | Gallus gallus (Chicken) | PF05843;                         |
| Q5F354     | 426906;    | RCJMB04_34d13               | Coatomer subunit alpha                                                                          |  | Gallus gallus (Chicken) | PF12894;PF04053;PF06957;PF00400; |
| Q5ZIA5     | 423063;    | COPB1 COPB<br>RCJMB04_28i17 | Coatomer subunit beta (Beta-coat protein) (Beta-COP)                                            |  | Gallus gallus (Chicken) | PF01602;PF07718;PF14806;         |
| A0A1L1RNV8 | 418435;    | CHCHD3                      | Uncharacterized protein                                                                         |  | Gallus gallus (Chicken) |                                  |
| E1BUJ8     | 416037;    | CHCHD4                      | CHCH domain-containing protein                                                                  |  | Gallus gallus (Chicken) | PF06747;                         |
| Q5F3I2     | 419886;    | RCJMB04_16d21               | Uncharacterized protein                                                                         |  | Gallus gallus (Chicken) | PF00313;PF12901;                 |
| A0A5H1ZRJ7 | 396243;    | COL1A2                      | Collagen alpha-2(I) chain                                                                       |  | Gallus gallus (Chicken) | PF01410;PF01391;                 |
| A0A1D5PE57 | 396340;    | COL3A1                      | Collagen alpha-1(III) chain                                                                     |  | Gallus gallus (Chicken) | PF01410;PF01391;PF00093;         |
| A0A1D5P8P3 | 395530;    | COL4A1                      | Collagen IV NC1 domain-containing protein                                                       |  | Gallus gallus (Chicken) | PF01413;PF01391;                 |
| F1P2Q3     | 418752;    | COL4A2                      | Collagen IV NC1 domain-containing protein                                                       |  | Gallus gallus (Chicken) | PF01413;PF01391;                 |
| A0A3Q2UBM2 | 423986;    | COL5A2                      | Uncharacterized protein                                                                         |  | Gallus gallus (Chicken) | PF01410;PF01391;PF00093;         |
| A0A3Q2UD12 | 396548;    | COL6A3                      | Collagen alpha-3(VI) chain                                                                      |  | Gallus gallus (Chicken) | PF01391;PF00014;PF00092;         |



|            |         |                           |                                                                                                              |  |                         |                                                                                  |
|------------|---------|---------------------------|--------------------------------------------------------------------------------------------------------------|--|-------------------------|----------------------------------------------------------------------------------|
| A0A3Q2UMJ2 | 396548; | COL6A3                    | Collagen alpha-3(VI) chain                                                                                   |  | Gallus gallus (Chicken) | PF01391;PF00014;PF00092;                                                         |
| A0A3Q3AR07 | 396548; | COL6A3                    | Collagen alpha-3(VI) chain                                                                                   |  | Gallus gallus (Chicken) | PF01391;PF00014;PF00092;                                                         |
| F1P2F0     | 396548; | COL6A3                    | Collagen alpha-3(VI) chain                                                                                   |  | Gallus gallus (Chicken) | PF01391;PF00014;PF00092;                                                         |
| A0A1D5P8I8 | 395875; | COL12A1                   | Collagen alpha-1(XII) chain                                                                                  |  | Gallus gallus (Chicken) | PF01391;PF00041;PF00092;                                                         |
| A0A1L1RPW4 | 395875; | COL12A1                   | Collagen alpha-1(XII) chain                                                                                  |  | Gallus gallus (Chicken) | PF01391;PF00041;PF00092;                                                         |
| F1NX22     | 395875; | COL12A1                   | Collagen alpha-1(XII) chain                                                                                  |  | Gallus gallus (Chicken) | PF01391;PF00041;PF00092;                                                         |
| O93419     | 373978; |                           | Collagen XVIII                                                                                               |  | Gallus gallus (Chicken) | PF01391;PF06482;                                                                 |
| Q2LK54     | 421061; | COLEC12 CL3               | Collectin-12 (Collectin-3) (CL-3) (cCL-3)                                                                    |  | Gallus gallus (Chicken) | PF01391;PF00059;                                                                 |
| A0A1D5NWU4 | 770048; | COMMD4                    | COMM domain-containing protein                                                                               |  | Gallus gallus (Chicken) | PF07258;                                                                         |
| F1NNT4     | 770048; | COMMD4                    | COMM domain-containing protein                                                                               |  | Gallus gallus (Chicken) | PF07258;                                                                         |
| Q5ZM89     | 422376; | COMMD5 RCJMB04_2n13       | COMM domain-containing protein 5                                                                             |  | Gallus gallus (Chicken) | PF07258;                                                                         |
| F1NY50     | 769778; | COMMD6                    | COMM domain-containing protein                                                                               |  | Gallus gallus (Chicken) | PF07258;                                                                         |
| E1BU89     | 419286; | COMMD7                    | COMM domain-containing protein                                                                               |  | Gallus gallus (Chicken) | PF07258;                                                                         |
| Q90633     | 396370; |                           | Complement C3                                                                                                |  | Gallus gallus (Chicken) | PF00207;PF07703;PF07677;PF01821;PF17790;PF01835;PF17791;PF17789;PF01759;PF07678; |
| Q9DEG0     | 395384; | Cremp                     | Complement regulatory membrane protein                                                                       |  | Gallus gallus (Chicken) | PF00084;                                                                         |
| A0A3Q2TRY3 | 429057; | CFH                       | Uncharacterized protein                                                                                      |  | Gallus gallus (Chicken) | PF00084;                                                                         |
| A0A1D5NW58 | 769006; | COMMD1                    | COMM domain-containing protein 1                                                                             |  | Gallus gallus (Chicken) | PF07258;PF17221;                                                                 |
| A0A1D5PHX9 | 769006; | COMMD1                    | COMM domain-containing protein 1                                                                             |  | Gallus gallus (Chicken) | PF07258;PF17221;                                                                 |
| Q8QGE8     | 395257; |                           | Core-binding factor beta                                                                                     |  | Gallus gallus (Chicken) | PF02312;                                                                         |
| Q01406     | 396455; | CTTN1 EMS1 P85.25         | Src substrate protein p85 (Cortactin) (p80)                                                                  |  | Gallus gallus (Chicken) | PF02218;PF14604;                                                                 |
| A0A3Q2UHE4 | 396455; | CTTN                      | SH3 domain-containing protein                                                                                |  | Gallus gallus (Chicken) | PF02218;PF14604;                                                                 |
| F1NU55     | 396455; | CTTN                      | SH3 domain-containing protein                                                                                |  | Gallus gallus (Chicken) | PF02218;PF14604;                                                                 |
| A0A1D5PW77 | 776376; | LOC776376                 | Ig-like domain-containing protein                                                                            |  | Gallus gallus (Chicken) | PF13895;PF00354;                                                                 |
| E1BYI2     | 416716; | CST7                      | Cystatin domain-containing protein                                                                           |  | Gallus gallus (Chicken) | PF00031;                                                                         |
| P67966     | 396176; | CSRP1 CSRP                | Cysteine and glycine-rich protein 1 (Cysteine-rich protein 1) (CRP) (CRP1)                                   |  | Gallus gallus (Chicken) | PF00412;                                                                         |
| P50460     | 396128; | CSRP2                     | Cysteine and glycine-rich protein 2 (Beta-cysteine-rich protein) (Beta-CRP) (Cysteine-rich protein 2) (CRP2) |  | Gallus gallus (Chicken) | PF00412;                                                                         |
| C4P6P8     | 396128; | CSRP2                     | Cysteine and glycine-rich protein 2                                                                          |  | Gallus gallus (Chicken) | PF00412;                                                                         |
| A0A3Q2UF90 | 423086; | CARS                      | CysteinyI-tRNA synthetase (EC 6.1.1.16)                                                                      |  | Gallus gallus (Chicken) | PF01406;                                                                         |
| F1P360     | 418073; | CKAP4                     | Uncharacterized protein                                                                                      |  | Gallus gallus (Chicken) |                                                                                  |
| Q5ZM92     | 427266; | DAZAP1 RCJMB04_2n4        | Uncharacterized protein                                                                                      |  | Gallus gallus (Chicken) | PF00076;                                                                         |
| Q5F3A9     | 422813; | RCJMB04_24b10             | RNA helicase (EC 3.6.4.13)                                                                                   |  | Gallus gallus (Chicken) | PF00270;PF04408;PF00271;PF07717;                                                 |
| Q5ZMC1     | 426504; | RP11-529K1.3 RCJMB04_24d4 | RNA helicase (EC 3.6.4.13)                                                                                   |  | Gallus gallus (Chicken) | PF00270;PF00271;                                                                 |
| A0A1D5PE45 | 426247; | DHRS4                     | Uncharacterized protein                                                                                      |  | Gallus gallus (Chicken) |                                                                                  |
| Q5F422     | 420828; | DEK RCJMB04_3m16          | SAP domain-containing protein                                                                                |  | Gallus gallus (Chicken) | PF08766;                                                                         |

|            |            |                      |                                                                                  |  |                         |                                  |
|------------|------------|----------------------|----------------------------------------------------------------------------------|--|-------------------------|----------------------------------|
| A0A1D5P2N1 | 419967;    | DCAKD                | Uncharacterized protein                                                          |  | Gallus gallus (Chicken) | PF01121;                         |
| F1NJD5     | 428529;    | DSG2                 | Uncharacterized protein                                                          |  | Gallus gallus (Chicken) | PF00028;                         |
| E1BW10     | 420869;    | DSP                  | SH3 domain-containing protein                                                    |  | Gallus gallus (Chicken) | PF00681;PF17902;PF18373;         |
| F1NX13     | 416962;    | DRG1                 | Uncharacterized protein                                                          |  | Gallus gallus (Chicken) | PF01926;PF16897;PF02824;         |
| F1NT58     | 416860;    | DIABLO               | Diablo homolog, mitochondrial                                                    |  | Gallus gallus (Chicken) | PF09057;                         |
| F1NKV0     | 424550;    | DNAJB4               | J domain-containing protein                                                      |  | Gallus gallus (Chicken) | PF00226;PF01556;                 |
| Q5Z113     | 418787;    | DNAJC3 RCJMB04_31h14 | DnaJ homolog subfamily C member 3                                                |  | Gallus gallus (Chicken) | PF00226;PF13181;                 |
| F1P053     | 418787;    | DNAJC3               | DnaJ homolog subfamily C member 3                                                |  | Gallus gallus (Chicken) | PF00226;PF00515;PF13181;         |
| E1C8S9     | 423640;    | DNAJC9               | J domain-containing protein                                                      |  | Gallus gallus (Chicken) | PF00226;                         |
| A0A1D5NZ71 | 420688;    | DNAJC13              | J domain-containing protein                                                      |  | Gallus gallus (Chicken) | PF00226;PF14237;                 |
| Q5ZK19     | 427404;    | DCTN3 RCJMB04_13i14  | Uncharacterized protein                                                          |  | Gallus gallus (Chicken) | PF07426;                         |
| A0A1D5PBA6 | 416269;    | DCTN4                | Uncharacterized protein                                                          |  | Gallus gallus (Chicken) | PF05502;                         |
| E1BQQ5     | 416269;    | DCTN4                | Uncharacterized protein                                                          |  | Gallus gallus (Chicken) | PF05502;                         |
| A0A1D5PHV9 | 417896;    | EEA1                 | Uncharacterized protein                                                          |  | Gallus gallus (Chicken) | PF01363;                         |
| E1BRE5     | 417896;    | EEA1                 | FYVE-type domain-containing protein                                              |  | Gallus gallus (Chicken) | PF01363;                         |
| E1BQW4     | 427445;    | EGFLAM               | Uncharacterized protein                                                          |  | Gallus gallus (Chicken) | PF00008;PF00041;PF00054;PF02210; |
| Q5ZM17     | 421306;    | RCJMB04_3g13         | Uncharacterized protein                                                          |  | Gallus gallus (Chicken) | PF18150;PF00350;PF12763;PF16880; |
| A0A3Q2UHT9 | 100859860; | EHD4                 | Uncharacterized protein                                                          |  | Gallus gallus (Chicken) | PF18150;PF12763;                 |
| Q5F3D8     | 428724;    | RCJMB04_20k15        | Electron transfer flavoprotein-ubiquinone oxidoreductase (ETF-QO) (EC 1.5.5.1)   |  | Gallus gallus (Chicken) | PF07992;                         |
| Q5F430     | 415467;    | RCJMB04_3k21         | EFG_C domain-containing protein                                                  |  | Gallus gallus (Chicken) | PF00679;PF14492;PF03144;         |
| Q6B0K7     | 771557;    |                      | Endoglin                                                                         |  | Gallus gallus (Chicken) | PF00100;                         |
| E1C8W3     | 428090;    | ENDOD1               | Uncharacterized protein                                                          |  | Gallus gallus (Chicken) | PF01223;                         |
| P81628     | 416882;    | ERP29 RCJMB04_24f23  | Endoplasmic reticulum resident protein 29 (ERp29) (Fragment)                     |  | Gallus gallus (Chicken) | PF07749;PF07912;                 |
| F1NRM8     | 416882;    | ERP29                | Endoplasmic reticulum resident protein 29                                        |  | Gallus gallus (Chicken) | PF07749;PF07912;                 |
| E1BSL7     | 420994;    | ERP44                | Thioredoxin domain-containing protein                                            |  | Gallus gallus (Chicken) | PF00085;                         |
| Q45QT1     | 421999;    |                      | Soluble epoxide hydrolase                                                        |  | Gallus gallus (Chicken) | PF00561;PF13419;                 |
| Q6EE30     | 100526660; |                      | Eukaryotic translation elongation factor 1                                       |  | Gallus gallus (Chicken) | PF00647;PF00043;PF02798;         |
| Q5ZMF0     | 419845;    | RCJMB04_2e17         | PUA domain-containing protein                                                    |  | Gallus gallus (Chicken) | PF17832;                         |
| A0A1L1S0V6 | 417490;    | EIF4H                | Eukaryotic translation initiation factor 4H                                      |  | Gallus gallus (Chicken) | PF00076;                         |
| F1NYA2     | 417490;    | EIF4H                | Eukaryotic translation initiation factor 4H                                      |  | Gallus gallus (Chicken) | PF00076;                         |
| Q5ZMR0     | 417490;    | RCJMB04_1g12         | Eukaryotic translation initiation factor 4H                                      |  | Gallus gallus (Chicken) | PF00076;                         |
| E1BVP1     | 395514;    | EIF5B                | Eukaryotic translation initiation factor 5B (Translation initiation factor IF-2) |  | Gallus gallus (Chicken) | PF00009;PF03144;PF11987;         |
| Q9W6Q4     | 395514;    | cIF2                 | Initiation of translation factor 2 (Osteoblast translation factor 3F) (Fragment) |  | Gallus gallus (Chicken) |                                  |
| Q5ZIV8     | 421192;    | RCJMB04_23d16        | Importin N-terminal domain-containing protein                                    |  | Gallus gallus (Chicken) | PF03810;PF08389;                 |

|            |         |                        |                                                                                                                                                                                                                                                                                                                                                                                                                                                       |  |                         |                                                                          |
|------------|---------|------------------------|-------------------------------------------------------------------------------------------------------------------------------------------------------------------------------------------------------------------------------------------------------------------------------------------------------------------------------------------------------------------------------------------------------------------------------------------------------|--|-------------------------|--------------------------------------------------------------------------|
| Q9YGV6     | 395701; | EZR                    | Ezrin                                                                                                                                                                                                                                                                                                                                                                                                                                                 |  | Gallus gallus (Chicken) | PF00769;PF09380;PF00373;PF09379;                                         |
| Q5F351     | 423954; | FAM175B RCJMB04_34I21  | MPN domain-containing protein                                                                                                                                                                                                                                                                                                                                                                                                                         |  | Gallus gallus (Chicken) |                                                                          |
| Q5ZHW0     | 424551; | RCJMB04_32I4           | Uncharacterized protein                                                                                                                                                                                                                                                                                                                                                                                                                               |  | Gallus gallus (Chicken) | PF09005;PF00013;                                                         |
| A0A3Q2TU83 | 417184; | FUBP3                  | Uncharacterized protein                                                                                                                                                                                                                                                                                                                                                                                                                               |  | Gallus gallus (Chicken) | PF09005;PF00013;                                                         |
| A0A3Q3AB26 | 417184; | FUBP3                  | Uncharacterized protein                                                                                                                                                                                                                                                                                                                                                                                                                               |  | Gallus gallus (Chicken) | PF09005;PF00013;                                                         |
| Q5ZM76     | 417184; | FUBP3 RCJMB04_2o21     | Uncharacterized protein                                                                                                                                                                                                                                                                                                                                                                                                                               |  | Gallus gallus (Chicken) | PF00013;                                                                 |
| F1NUY5     | 416225; | FAF2                   | UBX domain-containing protein                                                                                                                                                                                                                                                                                                                                                                                                                         |  | Gallus gallus (Chicken) | PF00789;                                                                 |
| F1NKQ7     | 423146; | FADD                   | Uncharacterized protein                                                                                                                                                                                                                                                                                                                                                                                                                               |  | Gallus gallus (Chicken) | PF00531;PF01335;                                                         |
| A0A1D5P6Q5 | 396061; | FASN                   | 3-hydroxyacyl-[acyl-carrier-protein] dehydratase (EC 1.1.1.100) (EC 1.3.1.39) (EC 2.3.1.38) (EC 2.3.1.39) (EC 2.3.1.41) (EC 2.3.1.85) (EC 3.1.2.14) (EC 4.2.1.59) (3-oxoacyl-[acyl-carrier-protein] reductase) (3-oxoacyl-[acyl-carrier-protein] synthase) (Acy-[acyl-carrier-protein] hydrolase) (Enoyl-[acyl-carrier-protein] reductase) (Fatty acid synthase) (Acyl-carrier-protein S-acyltransferase) (Acyl-carrier-protein S-malonyltransferase) |  | Gallus gallus (Chicken) | PF00698;PF00107;PF16197;PF00109;PF02801;PF08659;PF00550;PF14765;PF00975; |
| F1NJ6      | 419494; | FBXO44                 | Uncharacterized protein                                                                                                                                                                                                                                                                                                                                                                                                                               |  | Gallus gallus (Chicken) | PF12937;PF04300;                                                         |
| R4GFM0     | 418781; | FARP1                  | FERM, ARHGEF and pleckstrin domain-containing protein 1                                                                                                                                                                                                                                                                                                                                                                                               |  | Gallus gallus (Chicken) | PF08736;PF09380;PF00373;PF09379;PF00169;PF00621;                         |
| R9PXQ2     | 418781; | FARP1                  | FERM, ARHGEF and pleckstrin domain-containing protein 1                                                                                                                                                                                                                                                                                                                                                                                               |  | Gallus gallus (Chicken) | PF08736;PF09380;PF00373;PF09379;PF00169;PF00621;                         |
| F1NHT5     | 395404; | FETUB                  | Uncharacterized protein                                                                                                                                                                                                                                                                                                                                                                                                                               |  | Gallus gallus (Chicken) | PF00031;                                                                 |
| Q9DE41     | 395404; |                        | Apo AI promoter B-region binding protein (Fragment)                                                                                                                                                                                                                                                                                                                                                                                                   |  | Gallus gallus (Chicken) |                                                                          |
| F1P4V1     | 396307; | FGA                    | Fibrinogen alpha chain (Fibrinopeptide A)                                                                                                                                                                                                                                                                                                                                                                                                             |  | Gallus gallus (Chicken) | PF08702;PF12160;PF00147;                                                 |
| Q02020     | 373926; | FGB                    | Fibrinogen beta chain [Cleaved into: Fibrinopeptide B; Fibrinogen beta chain] (Fragment)                                                                                                                                                                                                                                                                                                                                                              |  | Gallus gallus (Chicken) | PF08702;PF00147;                                                         |
| E1BV78     | 395837; | FGG                    | Fibrinogen C-terminal domain-containing protein                                                                                                                                                                                                                                                                                                                                                                                                       |  | Gallus gallus (Chicken) | PF08702;PF00147;                                                         |
| P11722     | 396133; | FN1                    | Fibronectin (FN)                                                                                                                                                                                                                                                                                                                                                                                                                                      |  | Gallus gallus (Chicken) | PF00039;PF00040;PF00041;                                                 |
| Q90ZK7     | 395353; | FKBP25                 | Peptidylprolyl isomerase (EC 5.2.1.8)                                                                                                                                                                                                                                                                                                                                                                                                                 |  | Gallus gallus (Chicken) | PF18410;PF00254;                                                         |
| Q5ZJT4     | 418261; | RCJMB04_15n8           | Peptidylprolyl isomerase (EC 5.2.1.8)                                                                                                                                                                                                                                                                                                                                                                                                                 |  | Gallus gallus (Chicken) | PF00254;PF00515;PF13174;                                                 |
| Q646T7     | 421186; | FKBP51 FKBP5           | Peptidylprolyl isomerase (EC 5.2.1.8)                                                                                                                                                                                                                                                                                                                                                                                                                 |  | Gallus gallus (Chicken) | PF00254;PF00515;                                                         |
| A0A1D5PYB1 | 395652; | FKBP9                  | Peptidylprolyl isomerase (EC 5.2.1.8)                                                                                                                                                                                                                                                                                                                                                                                                                 |  | Gallus gallus (Chicken) | PF00254;                                                                 |
| Q9VIC3     | 395652; | cFKBP/SMAP             | Peptidylprolyl isomerase (EC 5.2.1.8)                                                                                                                                                                                                                                                                                                                                                                                                                 |  | Gallus gallus (Chicken) | PF00254;                                                                 |
| R4GH26     | 427013; | FKBP10                 | Peptidylprolyl isomerase (EC 5.2.1.8)                                                                                                                                                                                                                                                                                                                                                                                                                 |  | Gallus gallus (Chicken) | PF13202;PF00254;                                                         |
| E1C9A8     | 427233; | FOCAD                  | DUF3730 domain-containing protein                                                                                                                                                                                                                                                                                                                                                                                                                     |  | Gallus gallus (Chicken) | PF12530;PF11229;                                                         |
| Q90846     | 374097; | Galpa I3-o             | G protein                                                                                                                                                                                                                                                                                                                                                                                                                                             |  | Gallus gallus (Chicken) | PF00503;                                                                 |
| Q5ZMN1     | 416265; | G3BP1 RCJMB04_1j5      | Uncharacterized protein                                                                                                                                                                                                                                                                                                                                                                                                                               |  | Gallus gallus (Chicken) | PF02136;PF00076;                                                         |
| P07583     | 396491; | CG-1B                  | Beta-galactoside-binding lectin (14 kDa lectin) (C-14) (Calectin CG-1B)                                                                                                                                                                                                                                                                                                                                                                               |  | Gallus gallus (Chicken) | PF00337;                                                                 |
| Q5ZHQ2     | 421278; | LGALS GRP RCJMB04_34j3 | Galectin-related protein (Lectin galactoside-binding-like protein)                                                                                                                                                                                                                                                                                                                                                                                    |  | Gallus gallus (Chicken) | PF00337;                                                                 |
| Q9W6F5     | 395696; | VTDB                   | Gc-globulin (Group-specific component) (Vitamin D-binding protein)                                                                                                                                                                                                                                                                                                                                                                                    |  | Gallus gallus (Chicken) | PF00273;PF09164;                                                         |
| Q02391     | 396492; | GLG1 CFR               | Golgi apparatus protein 1 (Cysteine-rich fibroblast growth factor receptor)                                                                                                                                                                                                                                                                                                                                                                           |  | Gallus gallus (Chicken) | PF00839;                                                                 |
| R4GGF3     | 420999; | GLIPR2                 | SCP domain-containing protein                                                                                                                                                                                                                                                                                                                                                                                                                         |  | Gallus gallus (Chicken) | PF00188;                                                                 |
| Q5ZM94     | 418552; | RCJMB04_2m19           | Uncharacterized protein                                                                                                                                                                                                                                                                                                                                                                                                                               |  | Gallus gallus (Chicken) |                                                                          |
| A0A1D5P980 | 419514; | GFPT1                  | Glutamine-fructose-6-phosphate transaminase (isomerizing) (EC 2.6.1.16)                                                                                                                                                                                                                                                                                                                                                                               |  | Gallus gallus (Chicken) | PF01380;                                                                 |

|            |            |                              |                                                                                                                                                                       |  |                         |                                                 |
|------------|------------|------------------------------|-----------------------------------------------------------------------------------------------------------------------------------------------------------------------|--|-------------------------|-------------------------------------------------|
| A0A1D5PXH4 | 419514;    | GFPT1                        | Glutamine-fructose-6-phosphate transaminase (isomerizing) (EC 2.6.1.16)                                                                                               |  | Gallus gallus (Chicken) | PF01380;                                        |
| Q5ZIG5     | 419514;    | GFPT1 RCJMB04_26h2           | Glutamine-fructose-6-phosphate transaminase (isomerizing) (EC 2.6.1.16)                                                                                               |  | Gallus gallus (Chicken) | PF01380;                                        |
| A0A1D5PH72 | 426962;    | GFPT2                        | Glutamine-fructose-6-phosphate transaminase (isomerizing) (EC 2.6.1.16)                                                                                               |  | Gallus gallus (Chicken) | PF01380;                                        |
| A0A3Q2TSP8 | 421348;    | EPRS                         | Glutamyl-tRNA synthetase (EC 6.1.1.15) (EC 6.1.1.17) (Prolyl-tRNA synthetase)                                                                                         |  | Gallus gallus (Chicken) | PF03129;PF09180;PF00749;PF03950;PF0587;PF00458; |
| A0A3Q2UKS1 | 421348;    | EPRS                         | Glutamyl-tRNA synthetase (EC 6.1.1.15) (EC 6.1.1.17) (Prolyl-tRNA synthetase)                                                                                         |  | Gallus gallus (Chicken) | PF03129;PF09180;PF00749;PF03950;PF0587;PF00458; |
| Q5ZJ86     | 421348;    | RCJMB04_20b9                 | Glutamyl-tRNA synthetase (EC 6.1.1.15) (EC 6.1.1.17) (Prolyl-tRNA synthetase)                                                                                         |  | Gallus gallus (Chicken) | PF03129;PF09180;PF00749;PF03950;PF0587;PF00458; |
| F1NNP6     | 423968;    | GLRX3                        | Uncharacterized protein                                                                                                                                               |  | Gallus gallus (Chicken) | PF00462;PF00085;                                |
| Q5ZJQ0     | 425050;    | RCJMB04_16h16                | Uncharacterized protein                                                                                                                                               |  | Gallus gallus (Chicken) | PF01501;                                        |
| A0A1L1RYU0 | 420302;    | GPIHBP1                      | UPARLy6 domain-containing protein                                                                                                                                     |  | Gallus gallus (Chicken) |                                                 |
| A0A3Q2UGP4 | 426868;    | GOLGB1                       | Uncharacterized protein                                                                                                                                               |  | Gallus gallus (Chicken) |                                                 |
| F1P4P9     | 428014;    | GCC2                         | GRIP domain-containing protein                                                                                                                                        |  | Gallus gallus (Chicken) | PF01465;PF16704;                                |
| A3R0S3     | 386572;    | GRB2                         | Growth factor receptor-bound protein 2                                                                                                                                |  | Gallus gallus (Chicken) | PF00017;PF00018;                                |
| Q5ZL61     | 425028;    | RCJMB04_30a22                | Glutamine amidotransferase (EC 6.3.5.2)                                                                                                                               |  | Gallus gallus (Chicken) | PF00117;PF00958;PF02540;                        |
| A0A1D5NYH2 | 423988;    | GULP1                        | PID domain-containing protein                                                                                                                                         |  | Gallus gallus (Chicken) | PF00640;                                        |
| A0A3Q2U954 | 423988;    | GULP1                        | PID domain-containing protein                                                                                                                                         |  | Gallus gallus (Chicken) | PF00640;                                        |
| O93327     | 395858;    | MACROH2A1                    | Core histone macro-H2A.1 (Histone macroH2A1) (mH2A1) (H2A.y) (H2A.y)                                                                                                  |  | Gallus gallus (Chicken) | PF00125;PF16211;PF01661;                        |
| A0A1D5PAE4 | 776936;    | HDGF                         | PWWP domain-containing protein                                                                                                                                        |  | Gallus gallus (Chicken) | PF00855;                                        |
| Q5ZM33     | 425543;    | HP1BP3 RCJMB04_3f4           | Heterochromatin protein 1-binding protein 3                                                                                                                           |  | Gallus gallus (Chicken) | PF00538;                                        |
| Q5ZLB3     | 424136;    | HNRNPA1 RCJMB04_6o1          | Helix-destabilizing protein (Heterogeneous nuclear ribonucleoprotein A1) (Heterogeneous nuclear ribonucleoprotein A1, N-terminally processed) (hnRNP core protein A1) |  | Gallus gallus (Chicken) | PF11627;PF00076;                                |
| Q90602     | 396268;    |                              | Single stranded D box binding factor                                                                                                                                  |  | Gallus gallus (Chicken) | PF08143;PF00076;                                |
| Q5ZME1     | 420627;    | HNRNPA2B1 RCJMB04_2g17       | Uncharacterized protein                                                                                                                                               |  | Gallus gallus (Chicken) | PF00076;                                        |
| A0A1D5PXH1 | 100859627; | HNRNPA3                      | Uncharacterized protein                                                                                                                                               |  | Gallus gallus (Chicken) | PF00076;                                        |
| E1BZE6     | 100859627; | HNRNPA3                      | Uncharacterized protein                                                                                                                                               |  | Gallus gallus (Chicken) | PF00076;                                        |
| A0A3Q2UHQ9 | 422602;    | HNRNPD                       | Uncharacterized protein                                                                                                                                               |  | Gallus gallus (Chicken) | PF08143;PF00076;                                |
| Q5ZIH1     | 422602;    | HNRNPD RCJMB04_26e18         | Uncharacterized protein                                                                                                                                               |  | Gallus gallus (Chicken) | PF00076;                                        |
| Q5ZI72     | 422601;    | HNRNPDL HNRPDLC RCJMB04_29i7 | Heterogeneous nuclear ribonucleoprotein D-like (hnRNP D-like) (hnRNP DL)                                                                                              |  | Gallus gallus (Chicken) | PF00076;                                        |
| Q6WNG8     | 395157;    | HNRNPH2                      | Heterogeneous nuclear ribonucleoprotein H1-like protein                                                                                                               |  | Gallus gallus (Chicken) | PF00076;PF08080;                                |
| Q5F3D2     | 423686;    | HNRNPH3 RCJMB04_21b18        | Uncharacterized protein                                                                                                                                               |  | Gallus gallus (Chicken) | PF00076;                                        |
| A0A1D5PXG0 | 427458;    | HNRNPK                       | Heterogeneous nuclear ribonucleoprotein K                                                                                                                             |  | Gallus gallus (Chicken) | PF00013;PF08067;                                |
| E1C453     | 427458;    | HNRNPK                       | Heterogeneous nuclear ribonucleoprotein K                                                                                                                             |  | Gallus gallus (Chicken) | PF00013;PF08067;                                |
| Q5ZIQ3     | 426516;    | HNRNPK HNRPK RCJMB04_24e23   | Heterogeneous nuclear ribonucleoprotein K (hnRNP K)                                                                                                                   |  | Gallus gallus (Chicken) | PF00013;PF08067;                                |
| A0A1D5PSI3 | 426516;    | HNRNPKL                      | Heterogeneous nuclear ribonucleoprotein K                                                                                                                             |  | Gallus gallus (Chicken) | PF00013;PF08067;                                |
| Q5ZL80     | 420054;    | HNRNPM RCJMB04_7e17          | Uncharacterized protein                                                                                                                                               |  | Gallus gallus (Chicken) | PF11532;PF00076;                                |
| E1C3A9     | 395984;    | HDLBP                        | Vigilin                                                                                                                                                               |  | Gallus gallus (Chicken) | PF00013;                                        |

|            |            |                    |                                                         |  |                         |                                                          |
|------------|------------|--------------------|---------------------------------------------------------|--|-------------------------|----------------------------------------------------------|
| A0A1D5P692 | 424298;    | HNMT               | Uncharacterized protein                                 |  | Gallus gallus (Chicken) |                                                          |
| E1C378     | 424298;    | HNMT               | Uncharacterized protein                                 |  | Gallus gallus (Chicken) |                                                          |
| A0A3Q2UBJ7 | 100859112; | HINT1              | HIT domain-containing protein                           |  | Gallus gallus (Chicken) | PF01230;                                                 |
| Q9I882     | 395424;    | chPKCI HINT2       | Protein kinase C inhibitor                              |  | Gallus gallus (Chicken) | PF01230;                                                 |
| F5ANT1     | 396229;    | H-RAS              | V-Ha-ras Harvey rat sarcoma viral oncogene-like protein |  | Gallus gallus (Chicken) | PF00071;                                                 |
| A0A1D5P628 | 100858988; | HSPBP1             | Uncharacterized protein                                 |  | Gallus gallus (Chicken) | PF00514;                                                 |
| A0A1D5NWL9 | 395785;    | HSD17B4            | Uncharacterized protein                                 |  | Gallus gallus (Chicken) | PF00106;PF01575;PF02036;                                 |
| O42484     | 395785;    | HSD17B4            | 17-beta-hydroxysteroid dehydrogenase type IV            |  | Gallus gallus (Chicken) | PF00106;PF01575;PF02036;                                 |
| E1C7S2     | 100858057; | HSDL2              | SCP2 domain-containing protein                          |  | Gallus gallus (Chicken) | PF00106;PF02036;                                         |
| F1NBA8     | 423046;    | IPO7               | Importin N-terminal domain-containing protein           |  | Gallus gallus (Chicken) | PF08506;PF03810;                                         |
| Q90681     | 395817;    |                    | Cation-independent mannose-6-phosphate receptor         |  | Gallus gallus (Chicken) | PF00878;PF00040;                                         |
| A0A1D5PCF5 | 422620;    | IGFBP7             | Uncharacterized protein                                 |  | Gallus gallus (Chicken) | PF07679;PF00219;PF07648;                                 |
| I3VQH4     | 100858655; | ILF3               | Interleukin enhancer binding factor 3-like protein      |  | Gallus gallus (Chicken) | PF00035;PF07528;                                         |
| A0A1D5P2U7 | 427211;    | IQGAP2             | Uncharacterized protein                                 |  | Gallus gallus (Chicken) | PF00307;PF00612;PF00616;PF03836;                         |
| A0A1D5PPF6 | 427211;    | IQGAP2             | Uncharacterized protein                                 |  | Gallus gallus (Chicken) | PF00307;PF00612;PF00616;PF03836;                         |
| E1C2F9     | 427211;    | IQGAP2             | Uncharacterized protein                                 |  | Gallus gallus (Chicken) | PF00307;PF00612;PF00616;PF03836;                         |
| A0A1D5PIZ8 | 415591;    | IQGAP3             | Uncharacterized protein                                 |  | Gallus gallus (Chicken) | PF00307;PF00612;PF00616;PF03836;                         |
| F1NKW4     | 421930;    | IAH1               | SGNH_hydro domain-containing protein                    |  | Gallus gallus (Chicken) | PF13472;                                                 |
| Q5ZJ26     | 768701;    | RCJMB04_21h11      | Uncharacterized protein KIAA1671 homolog                |  | Gallus gallus (Chicken) | PF15327;                                                 |
| A0A1D5P9E9 | 396335;    | KTN1               | Kinectin                                                |  | Gallus gallus (Chicken) | PF05104;                                                 |
| A0A3Q2U3D6 | 396335;    | KTN1               | Kinectin                                                |  | Gallus gallus (Chicken) | PF05104;                                                 |
| A0A3Q2UJC9 | 428148;    | LAMA5              | Uncharacterized protein                                 |  | Gallus gallus (Chicken) | PF00052;PF00053;PF00054;PF02210;PF06008;PF06009;PF00055; |
| F1NZZ2     | 428148;    | LAMA5              | Uncharacterized protein                                 |  | Gallus gallus (Chicken) | PF00052;PF00053;PF00054;PF02210;PF06008;PF06009;PF00055; |
| F1NJ23     | 396478;    | LAMB1              | Laminin subunit beta-1                                  |  | Gallus gallus (Chicken) | PF00053;PF00055;                                         |
| F1NI05     | 424442;    | LAMC1              | Uncharacterized protein                                 |  | Gallus gallus (Chicken) | PF00052;PF00053;PF00055;                                 |
| A4GTP0     | 373917;    |                    | Galectin-3                                              |  | Gallus gallus (Chicken) | PF00337;                                                 |
| A0A1L1RN08 | 426849;    | LMAN1L             | L-type lectin-like domain-containing protein            |  | Gallus gallus (Chicken) | PF03388;                                                 |
| Q5F3E6     | 426849;    | RCJMB04_19g16      | L-type lectin-like domain-containing protein            |  | Gallus gallus (Chicken) | PF03388;                                                 |
| A0A1D5PW25 | 100859676; | LMAN2              | L-type lectin-like domain-containing protein            |  | Gallus gallus (Chicken) | PF03388;                                                 |
| F1NGU3     | 421403;    | LRPPRC             | Uncharacterized protein                                 |  | Gallus gallus (Chicken) | PF01535;PF13812;                                         |
| Q5ZLN0     | 424713;    | LRRC40 RCJMB04_5h5 | Leucine-rich repeat-containing protein 40               |  | Gallus gallus (Chicken) | PF13855;                                                 |
| F1NWD5     | 424713;    | LRRC40             | Leucine-rich repeat-containing protein 40               |  | Gallus gallus (Chicken) | PF13855;                                                 |
| A0A1L1RZ25 | 423236;    | LRRC57             | Uncharacterized protein                                 |  | Gallus gallus (Chicken) | PF13855;                                                 |
| F1NEF7     | 396471;    | LECT2              | Uncharacterized protein                                 |  | Gallus gallus (Chicken) |                                                          |

|            |            |                     |                                              |  |                         |                                          |
|------------|------------|---------------------|----------------------------------------------|--|-------------------------|------------------------------------------|
| D2Z1L9     | 420002;    | LASP1               | LIM and SH3 domain protein 1                 |  | Gallus gallus (Chicken) | PF00412;PF00880;PF14604;                 |
| A0A1D5PTF4 | 426878;    | LIMA1               | LIM zinc-binding domain-containing protein   |  | Gallus gallus (Chicken) | PF00412;                                 |
| A0A3Q3B025 | 426878;    | LIMA1               | LIM zinc-binding domain-containing protein   |  | Gallus gallus (Chicken) | PF00412;                                 |
| Q6IYF7     | 414880;    | PINCH1              | LIM domain-containing protein                |  | Gallus gallus (Chicken) | PF00412;                                 |
| Q90890     | 420872;    | LY86 MD1            | Lymphocyte antigen 86 (Ly-86) (Protein MD-1) |  | Gallus gallus (Chicken) | PF02221;                                 |
| Q5ZLW0     | 418852;    | LCP1 RCJMB04_4k19   | Uncharacterized protein                      |  | Gallus gallus (Chicken) | PF00307;PF13499;                         |
| A0A3Q2UDX1 | 374254;    | LSP1P1              | Uncharacterized protein                      |  | Gallus gallus (Chicken) | PF02029;                                 |
| Q5F3Y0     | 374254;    | LSP1P1 RCJMB04_4h16 | Uncharacterized protein                      |  | Gallus gallus (Chicken) | PF02029;                                 |
| Q5ZM4      | 420049;    | MVP RCJMB04_1p8     | Major vault protein (MVP)                    |  | Gallus gallus (Chicken) | PF11978;PF01505;PF17794;PF17795;PF17796; |
| M1X8W0     | 420516;    | MRC1L-A             | MRC1L-A                                      |  | Gallus gallus (Chicken) | PF00040;PF00059;PF00652;                 |
| Q8UWC5     | 373948;    | MATR3               | Nuclear protein matrin 3                     |  | Gallus gallus (Chicken) |                                          |
| Q90880     | 448832;    |                     | L-glycerin                                   |  | Gallus gallus (Chicken) | PF08205;PF13895;                         |
| A0A1D5PKN8 | 418048;    | MPST                | Uncharacterized protein                      |  | Gallus gallus (Chicken) | PF00581;                                 |
| E1C0L3     | 421395;    | MTA3                | Uncharacterized protein                      |  | Gallus gallus (Chicken) | PF01426;PF01448;PF00320;PF17226;PF0249;  |
| F1P531     | 427395;    | MCCC2               | Uncharacterized protein                      |  | Gallus gallus (Chicken) | PF01039;                                 |
| Q31600     | 417035;    | B-G NTBGA-1 NTBGA-3 | B-G protein (BG protein)                     |  | Gallus gallus (Chicken) | PF07686;                                 |
| Q31608     | 417035;    | B-G NTBGA-4         | B-G protein (BG protein)                     |  | Gallus gallus (Chicken) | PF07686;                                 |
| A0A1D6UPR2 | 426737;    | MAPT                | Microtubule-associated protein               |  | Gallus gallus (Chicken) | PF00418;                                 |
| A0A3Q2U2W1 | 426737;    | MAPT                | Microtubule-associated protein               |  | Gallus gallus (Chicken) | PF00418;                                 |
| A0A3Q2UDR8 | 426737;    | MAPT                | Microtubule-associated protein               |  | Gallus gallus (Chicken) | PF00418;                                 |
| A0A3Q2UE88 | 426737;    | MAPT                | Microtubule-associated protein               |  | Gallus gallus (Chicken) | PF00418;                                 |
| B0LVF9     | 426737;    | MAPT                | Microtubule-associated protein               |  | Gallus gallus (Chicken) | PF00418;                                 |
| B0LVG0     | 426737;    | MAPT                | Microtubule-associated protein               |  | Gallus gallus (Chicken) | PF00418;                                 |
| R4GJG3     | 100858848; | MIF4GD              | MIF4G domain-containing protein              |  | Gallus gallus (Chicken) | PF02854;                                 |
| A0A1L1S057 | 770869;    | MGARP               | AIF-MLS domain-containing protein            |  | Gallus gallus (Chicken) | PF14962;                                 |
| E1BVT7     | 421585;    | MRPL18              | Uncharacterized protein                      |  | Gallus gallus (Chicken) |                                          |
| A0A1D5PD29 | 418475;    | MRPL39              | TGS domain-containing protein                |  | Gallus gallus (Chicken) |                                          |
| F1NND9     | 422114;    | MRPL58              | RF_PROK_I domain-containing protein          |  | Gallus gallus (Chicken) | PF00472;                                 |
| A0A3Q3AY70 | 420097;    | MISP                | AKAP2_C domain-containing protein            |  | Gallus gallus (Chicken) | PF15304;                                 |
| A0A1D5P6C3 | 423097;    | MOB2                | Uncharacterized protein                      |  | Gallus gallus (Chicken) | PF03637;                                 |
| A0A3Q2U5J6 | 423097;    | MOB2                | Uncharacterized protein                      |  | Gallus gallus (Chicken) | PF03637;                                 |
| A0A3Q3AP67 | 423097;    | MOB2                | Uncharacterized protein                      |  | Gallus gallus (Chicken) | PF03637;                                 |
| A0A1D5NTN8 | 416024;    | MGLL                | Hydrolase_4 domain-containing protein        |  | Gallus gallus (Chicken) | PF12146;                                 |
| A0A1D5PK92 | 416024;    | MGLL                | Hydrolase_4 domain-containing protein        |  | Gallus gallus (Chicken) | PF12146;                                 |

|            |         |                     |                                                                                                                                                                                 |  |                                   |                          |
|------------|---------|---------------------|---------------------------------------------------------------------------------------------------------------------------------------------------------------------------------|--|-----------------------------------|--------------------------|
| A0A3Q2U9E5 | 416024; | MGLL                | Hydrolase_4 domain-containing protein                                                                                                                                           |  | Gallus gallus (Chicken)           | PF12146;                 |
| A3F957     | 418784; | MBNL2               | Muscleblind-like 2 isoform 2                                                                                                                                                    |  | Gallus gallus (Chicken)           | PF00642;                 |
| A3F958     | 418784; | MBNL2               | Muscleblind-like 2 isoform 3                                                                                                                                                    |  | Gallus gallus (Chicken)           | PF00642;                 |
| A3F959     | 418784; | MBNL2               | Muscleblind-like 2 isoform 5                                                                                                                                                    |  | Gallus gallus (Chicken)           | PF00642;                 |
| A3F960     | 418784; | MBNL2               | Muscleblind-like 2 isoform 7                                                                                                                                                    |  | Gallus gallus (Chicken)           |                          |
| A3F961     | 418784; | MBNL2               | Muscleblind-like 2 isoform 6                                                                                                                                                    |  | Gallus gallus (Chicken)           | PF00642;                 |
| A3F962     | 418784; | MBNL2               | Muscleblind-like 2 isoform 1                                                                                                                                                    |  | Gallus gallus (Chicken)           | PF00642;                 |
| A3F963     | 418784; | MBNL2               | Muscleblind-like 2 isoform 4                                                                                                                                                    |  | Gallus gallus (Chicken)           | PF00642;                 |
| A0A1L1RUU9 | 770011; | MYL12B              | Uncharacterized protein                                                                                                                                                         |  | Gallus gallus (Chicken)           | PF13405;PF13833;         |
| Q6W5H0     | 654833; |                     | Myosin light chain smooth muscle isoform                                                                                                                                        |  | Meleagris gallopavo (Wild turkey) |                          |
| P09540     | 396472; |                     | Myosin light chain, embryonic (L23)                                                                                                                                             |  | Gallus gallus (Chicken)           |                          |
| P02612     | 396215; |                     | Myosin regulatory light chain 2, smooth muscle major isoform (MLC-2) (DTNB) (G1) (isoform L20-A)                                                                                |  | Gallus gallus (Chicken)           | PF13405;PF13833;         |
| F1NVR6     | 422440; | NAA15               | Uncharacterized protein                                                                                                                                                         |  | Gallus gallus (Chicken)           | PF12569;PF13181;         |
| Q5ZMS8     | 418319; | RCJMB04_1e13        | N-acetyltransferase domain-containing protein                                                                                                                                   |  | Gallus gallus (Chicken)           | PF00583;                 |
| Q5ZMH8     | 427283; | NANS RCJMB04_2a5    | AFP-like domain-containing protein                                                                                                                                              |  | Gallus gallus (Chicken)           | PF03102;PF08666;         |
| A0A1D5PKH6 | 776932; | NAT8B               | N-acetyltransferase domain-containing protein                                                                                                                                   |  | Gallus gallus (Chicken)           | PF00583;                 |
| Q5ZKW7     | 419556; | RCJMB04_8n22        | WD_REPEATS_REGION domain-containing protein                                                                                                                                     |  | Gallus gallus (Chicken)           | PF00400;                 |
| Q5ZI00     | 419039; | NDUFA9 RCJMB04_31o2 | Epimerase domain-containing protein                                                                                                                                             |  | Gallus gallus (Chicken)           | PF01370;                 |
| Q5ZK48     | 418727; | RCJMB04_13d16       | Cytoplasmic protein                                                                                                                                                             |  | Gallus gallus (Chicken)           | PF00017;PF00018;PF14604; |
| A0A3Q2UHS2 | 424000; | NCKAP1              | Uncharacterized protein                                                                                                                                                         |  | Gallus gallus (Chicken)           | PF09735;                 |
| E1C6G9     | 424000; | NCKAP1              | Uncharacterized protein                                                                                                                                                         |  | Gallus gallus (Chicken)           | PF09735;                 |
| A0A1D5P310 | 396085; | NF1                 | Neurofibromin                                                                                                                                                                   |  | Gallus gallus (Chicken)           | PF13716;PF00616;         |
| A0A1D5PAD7 | 396085; | NF1                 | Neurofibromin                                                                                                                                                                   |  | Gallus gallus (Chicken)           | PF13716;PF00616;         |
| A0A1D5PWG6 | 396085; | NF1                 | Neurofibromin                                                                                                                                                                   |  | Gallus gallus (Chicken)           | PF13716;PF00616;         |
| A0A1D5PNU7 | 415316; | NPTN                | Uncharacterized protein                                                                                                                                                         |  | Gallus gallus (Chicken)           |                          |
| Q5ZIZ5     | 428701; | NONO RCJMB04_22g22  | Uncharacterized protein                                                                                                                                                         |  | Gallus gallus (Chicken)           | PF08075;PF00076;         |
| Q76MF7     | 404775; | JC7 RCJMB04_14f20   | JC7                                                                                                                                                                             |  | Gallus gallus (Chicken)           |                          |
| D8MIU8     | 768717; | NUMA                | Nuclear mitotic apparatus protein                                                                                                                                               |  | Gallus gallus (Chicken)           |                          |
| R4GLW9     | 768717; | NUMA1               | Uncharacterized protein                                                                                                                                                         |  | Gallus gallus (Chicken)           |                          |
| P15771     | 396201; | NCL                 | Nucleolin (Protein C23)                                                                                                                                                         |  | Gallus gallus (Chicken)           | PF00076;                 |
| Q5ZKC6     | 416467; | RCJMB04_11m15       | Uncharacterized protein                                                                                                                                                         |  | Gallus gallus (Chicken)           |                          |
| R4GJX0     | 427399; | NUDT2               | Bis(5'-nucleosyl)-tetraphosphatase [asymmetrical] (EC 3.6.1.17) (Dienosine 5',5''-P1,P4-tetraphosphate asymmetrical hydrolase) (Nucleoside diphosphate-linked moiety X motif 2) |  | Gallus gallus (Chicken)           | PF00293;                 |
| E1C4K9     | 419905; | NUDT3               | Nudix hydrolase domain-containing protein                                                                                                                                       |  | Gallus gallus (Chicken)           | PF00293;                 |
| A0A452J855 | 395557; | NUDT16L1            | Tudor-interacting repair regulator protein                                                                                                                                      |  | Gallus gallus (Chicken)           |                          |

|            |            |                            |                                                                                             |  |                         |                                          |
|------------|------------|----------------------------|---------------------------------------------------------------------------------------------|--|-------------------------|------------------------------------------|
| Q98UI9     | 395381;    | MUC5B                      | Mucin-5B (Ovomucin, alpha-subunit)                                                          |  | Gallus gallus (Chicken) | PF08742;PF01826;PF00094;                 |
| F1NZY2     | 395381;    | LOC395381                  | Uncharacterized protein                                                                     |  | Gallus gallus (Chicken) | PF08742;PF01826;PF00094;                 |
| A0A1D5P2Y6 | 100857958; | PBXIP1                     | Uncharacterized protein                                                                     |  | Gallus gallus (Chicken) |                                          |
| Q5F3U9     | 418910;    | PDS5B APRI<br>RCJMB04_6g19 | Sister chromatid cohesion protein PDS5 homolog B (Androgen-induced proliferation inhibitor) |  | Gallus gallus (Chicken) |                                          |
| A0A1D5PELO | 418910;    | PDS5B                      | Sister chromatid cohesion protein PDS5 homolog B                                            |  | Gallus gallus (Chicken) |                                          |
| A0A1D5NU14 | 428948;    | PDLIM1                     | Uncharacterized protein                                                                     |  | Gallus gallus (Chicken) | PF15936;PF00412;PF00595;                 |
| E1C852     | 428948;    | PDLIM1                     | Uncharacterized protein                                                                     |  | Gallus gallus (Chicken) | PF15936;PF00412;PF00595;                 |
| Q9PUJ47    | 414873;    | PDLIM3 ALP                 | PDZ and LIM domain protein 3 (Alpha-actinin-associated LIM protein)                         |  | Gallus gallus (Chicken) | PF15936;PF00412;PF00595;                 |
| F1NHA9     | 414873;    | PDLIM3                     | PDZ and LIM domain protein 3                                                                |  | Gallus gallus (Chicken) | PF15936;PF00412;PF00595;                 |
| A0A1D5P8X3 | 422699;    | PDLIM5                     | PDZ domain-containing protein                                                               |  | Gallus gallus (Chicken) | PF15936;PF00595;                         |
| A0A3Q2U6G6 | 422699;    | PDLIM5                     | PDZ domain-containing protein                                                               |  | Gallus gallus (Chicken) | PF15936;PF00595;                         |
| Q5F3G1     | 422699;    | RCJMB04_18a15              | Uncharacterized protein                                                                     |  | Gallus gallus (Chicken) | PF15936;PF00412;PF00595;                 |
| A0A1D5P4Z5 | 419644;    | PEF1                       | Uncharacterized protein                                                                     |  | Gallus gallus (Chicken) | PF13202;PF13405;                         |
| E1BXG9     | 428725;    | PPID                       | Uncharacterized protein                                                                     |  | Gallus gallus (Chicken) | PF00160;                                 |
| F1NV96     | 408044;    | PPL                        | SH3_10 domain-containing protein                                                            |  | Gallus gallus (Chicken) | PF17902;                                 |
| A0A1D5PLH7 | 418601;    | PRDX4                      | Thioredoxin domain-containing protein                                                       |  | Gallus gallus (Chicken) | PF10417;PF00578;                         |
| F1NNS8     | 418601;    | PRDX4                      | Thioredoxin domain-containing protein                                                       |  | Gallus gallus (Chicken) | PF10417;PF00578;                         |
| Q5ZIG4     | 424224;    | RCJMB04_26i1               | Uncharacterized protein                                                                     |  | Gallus gallus (Chicken) |                                          |
| Q5ZLV1     | 418398;    | RCJMB04_4I18               | PEST proteolytic signal-containing nuclear protein                                          |  | Gallus gallus (Chicken) | PF15473;                                 |
| A0A1D5PGJ3 | 373898;    | PALD1                      | Paladin                                                                                     |  | Gallus gallus (Chicken) |                                          |
| A0A3Q3AGL8 | 424915;    | PCYT1A                     | CTP_transf_like domain-containing protein                                                   |  | Gallus gallus (Chicken) | PF01467;                                 |
| A0A3Q2UAW3 | 395777;    | PHEX                       | Uncharacterized protein                                                                     |  | Gallus gallus (Chicken) | PF01431;PF05649;                         |
| Q5ZIY2     | 416912;    | PITPNB RCJMB04_22n3        | Uncharacterized protein                                                                     |  | Gallus gallus (Chicken) | PF02121;                                 |
| Q5ZHU4     | 428411;    | PFKP RCJMB04_33d2          | Uncharacterized protein                                                                     |  | Gallus gallus (Chicken) | PF00365;                                 |
| A0A3Q2TWU3 | 420416;    | PLCD1                      | Phosphoinositide phospholipase C (EC 3.1.4.11)                                              |  | Gallus gallus (Chicken) | PF00168;PF09279;PF16457;PF00388;PF00387; |
| E1C3D8     | 420416;    | PLCD1                      | Phosphoinositide phospholipase C (EC 3.1.4.11)                                              |  | Gallus gallus (Chicken) | PF00168;PF09279;PF16457;PF00388;PF00387; |
| Q98TD1     | 395364;    | PIT 54                     | PIT 54                                                                                      |  | Gallus gallus (Chicken) | PF00530;                                 |
| Q5ZI39     | 422222;    | PLS3 RCJMB04_30j1          | Uncharacterized protein                                                                     |  | Gallus gallus (Chicken) | PF00307;PF13499;                         |
| A0A3Q2UC12 | 419765;    | PAFAH1B2                   | Platelet-activating factor acetylhydrolase IB subunit alpha2                                |  | Gallus gallus (Chicken) | PF13472;                                 |
| Q9W6Q0     | 395669;    |                            | Pleckstrin                                                                                  |  | Gallus gallus (Chicken) | PF00610;PF00169;                         |
| E1C7S5     | 421632;    | PLEKHG1                    | Uncharacterized protein                                                                     |  | Gallus gallus (Chicken) | PF00621;                                 |
| A0A1D5PJL7 | 416602;    | PM5                        | SpaA domain-containing protein                                                              |  | Gallus gallus (Chicken) | PF17802;                                 |
| A0A1D5P893 | 426023;    | LOC426023                  | Uncharacterized protein                                                                     |  | Gallus gallus (Chicken) | PF00013;                                 |
| Q5F3W7     | 426402;    | RCJMB04_5e8                | Uncharacterized protein                                                                     |  | Gallus gallus (Chicken) | PF00076;                                 |



|            |                   |                                           |                                                                                                                            |  |                         |                                                                  |
|------------|-------------------|-------------------------------------------|----------------------------------------------------------------------------------------------------------------------------|--|-------------------------|------------------------------------------------------------------|
| A0A1L1S0D8 | 420098;           | PTBP1                                     | Polypyrimidine tract-binding protein 1                                                                                     |  | Gallus gallus (Chicken) | PF00076;PF11835;                                                 |
| Q5F456     | 420098;           | RCJMB04_3b17                              | Polypyrimidine tract-binding protein 1                                                                                     |  | Gallus gallus (Chicken) | PF00076;PF11835;                                                 |
| A0A1L1RYG0 | 425504;           | KCTD12                                    | BTB domain-containing protein                                                                                              |  | Gallus gallus (Chicken) | PF02214;                                                         |
| E1C3V1     | 427644;           | KCTD16                                    | BTB domain-containing protein                                                                                              |  | Gallus gallus (Chicken) | PF02214;                                                         |
| A0A1D5NXX7 | 100859376;        | PFDN5                                     | Uncharacterized protein                                                                                                    |  | Gallus gallus (Chicken) | PF02996;                                                         |
| F1NNQ9     | 417270;           | PRPF4                                     | WD_REPEATS_REGION domain-containing protein                                                                                |  | Gallus gallus (Chicken) | PF08799;PF00400;                                                 |
| F1N9U0     | 419254;           | PRPF6                                     | PRPF6 homolog (Pre-mRNA-processing factor 6) (U5 snRNP-associated 102 kDa protein)                                         |  | Gallus gallus (Chicken) | PF06424;                                                         |
| E1BZT5     | 417559;           | PRPF8                                     | MPN domain-containing protein                                                                                              |  | Gallus gallus (Chicken) | PF01398;PF08082;PF08083;PF08084;PF12134;PF10598;PF10597;PF10596; |
| Q5Z164     | 107051321;        | RCJMB04_29p4                              | Uncharacterized protein                                                                                                    |  | Gallus gallus (Chicken) |                                                                  |
| P24802     | 419485;           | PLOD1 PLOD                                | Procollagen-lysine,2-oxoglutarate 5-dioxygenase 1 (EC 1.14.11.4) (Lysyl hydroxylase 1) (LH1)                               |  | Gallus gallus (Chicken) | PF03171;                                                         |
| Q5ZLX0     | 422501;           | PGRMC2 RCJMB04_4j4                        | Cytochrome b5 heme-binding domain-containing protein                                                                       |  | Gallus gallus (Chicken) | PF00173;                                                         |
| F1NHD8     | 420988;           | PDCD6                                     | Uncharacterized protein                                                                                                    |  | Gallus gallus (Chicken) | PF13499;                                                         |
| A0A1D5PLK6 | 420725;           | PDCD6IP                                   | BRO1 domain-containing protein                                                                                             |  | Gallus gallus (Chicken) | PF13949;PF03097;                                                 |
| Q5ZJ70     | 420725;           | RCJMB04_20e18                             | BRO1 domain-containing protein                                                                                             |  | Gallus gallus (Chicken) | PF13949;PF03097;                                                 |
| F1P0M2     | 418774;           | PCCA                                      | Propanoyl-CoA:carbon dioxide ligase subunit alpha (EC 6.4.1.3) (Propionyl-CoA carboxylase alpha chain, mitochondrial)      |  | Gallus gallus (Chicken) | PF02785;PF00289;PF00364;PF02786;PF18140;                         |
| A0A1D5P592 | 768706;           | PCCB                                      | Uncharacterized protein                                                                                                    |  | Gallus gallus (Chicken) | PF01039;                                                         |
| Q5F3P0     | 417125;           | RCJMB04_11e7                              | 26S proteasome non-ATPase regulatory subunit 5                                                                             |  | Gallus gallus (Chicken) | PF10508;                                                         |
| F1P1R3     | 422351;           | PSMD10                                    | ANK_REP_REGION domain-containing protein                                                                                   |  | Gallus gallus (Chicken) | PF12796;PF13606;                                                 |
| E1C6N0     | 424189;           | PSMD14                                    | 26S proteasome regulatory subunit RPN11                                                                                    |  | Gallus gallus (Chicken) | PF01398;PF13012;                                                 |
| A0A1D5P8C5 | 424844;           | PPP1R7                                    | LRRcap domain-containing protein                                                                                           |  | Gallus gallus (Chicken) |                                                                  |
| A0A1L1RLA6 | 424844;           | PPP1R7                                    | LRRcap domain-containing protein                                                                                           |  | Gallus gallus (Chicken) |                                                                  |
| Q5ZL12     | 421287;           | PPP1R21 CCDC128<br>KLRAQ1 RCJMB04_8e10    | Protein phosphatase 1 regulatory subunit 21 (Coiled-coil domain-containing protein 128) (KLRAQ motif-containing protein 1) |  | Gallus gallus (Chicken) | PF10205;PF10212;                                                 |
| E1C2F4     | 422305;           | GATD3AL2                                  | Uncharacterized protein                                                                                                    |  | Gallus gallus (Chicken) |                                                                  |
| A0A1D5P5L5 | 107048987;424014; | LOC107048987<br>LOC112532770<br>LOC424014 | Methyltransf_11 domain-containing protein                                                                                  |  | Gallus gallus (Chicken) | PF08241;                                                         |
| Q8JHF6     | 374263;           | PYC                                       | Pyruvate carboxylase (EC 6.4.1.1)                                                                                          |  | Gallus gallus (Chicken) | PF02785;PF00289;PF00364;PF02786;PF0682;PF02436;                  |
| A0A1D5PEH3 | 418610;           | PDHA2                                     | Pyruvate dehydrogenase E1 component subunit alpha (EC 1.2.4.1)                                                             |  | Gallus gallus (Chicken) | PF00676;                                                         |
| Q5F426     | 418610;           | PDHA2 RCJMB04_3i20                        | Pyruvate dehydrogenase E1 component subunit alpha (EC 1.2.4.1)                                                             |  | Gallus gallus (Chicken) | PF00676;                                                         |
| A0A1D5P1U2 | 416066;           | PDHB                                      | Pyruvate dehydrogenase E1 component subunit beta (EC 1.2.4.1)                                                              |  | Gallus gallus (Chicken) | PF02779;PF02780;                                                 |
| Q9YH18     | 374204;           | QKI                                       | Protein quaking                                                                                                            |  | Gallus gallus (Chicken) | PF00013;PF16551;PF16544;                                         |
| F1NWV0     | 374204;           | QKI                                       | Protein quaking                                                                                                            |  | Gallus gallus (Chicken) | PF00013;PF16551;PF16544;                                         |
| Q5ZKQ2     | 426335;           | QDPR RCJMB04_9i5                          | Uncharacterized protein                                                                                                    |  | Gallus gallus (Chicken) |                                                                  |
| A0A1L1RP46 | 421273;           | RAB1B                                     | Uncharacterized protein                                                                                                    |  | Gallus gallus (Chicken) | PF00071;                                                         |
| Q5ZIP7     | 420649;           | RAB5A RCJMB04_24h4                        | Uncharacterized protein                                                                                                    |  | Gallus gallus (Chicken) | PF00071;                                                         |
| E1C0F3     | 416016;           | RAB7A                                     | Uncharacterized protein                                                                                                    |  | Gallus gallus (Chicken) | PF00071;                                                         |

|            |            |                           |                                                              |  |                         |                                  |
|------------|------------|---------------------------|--------------------------------------------------------------|--|-------------------------|----------------------------------|
| Q5F3R8     | 420063;    | RAB11B RCJMB04_8f9        | Uncharacterized protein                                      |  | Gallus gallus (Chicken) | PF00071;                         |
| A0A1D5P8F7 | 421048;    | RAB12                     | Uncharacterized protein                                      |  | Gallus gallus (Chicken) | PF00071;                         |
| Q5ZLB8     | 419318;    | RAB22A RCJMB04_6n2        | Uncharacterized protein                                      |  | Gallus gallus (Chicken) | PF00071;                         |
| A0A1L1RUW1 | 100858849; | RAB34                     | Uncharacterized protein                                      |  | Gallus gallus (Chicken) | PF00071;                         |
| Q9PU45     | 395511;    | RDX                       | Radixin                                                      |  | Gallus gallus (Chicken) | PF00769;PF09380;PF00373;PF09379; |
| Q5ZJ38     | 416787;    | RANBP1 RCJMB04_20p3       | RanBD1 domain-containing protein                             |  | Gallus gallus (Chicken) | PF00638;                         |
| Q5ZL86     | 422701;    | RCJMB04_7d16              | Uncharacterized protein                                      |  | Gallus gallus (Chicken) | PF00514;                         |
| A0A3Q3AUL4 | 420434;    | RHEB                      | Uncharacterized protein                                      |  | Gallus gallus (Chicken) | PF00071;                         |
| O93467     | 395442;    | cRhoA RHOA rhoA           | GTP-binding protein (GTPase cRhoA) (RhoA GTPase)             |  | Gallus gallus (Chicken) | PF00071;                         |
| A0A1D5PEW1 | 420524;    | RSU1                      | Uncharacterized protein                                      |  | Gallus gallus (Chicken) | PF13855;                         |
| Q6LC82     | 395871;    | cRac1A RAC1               | GTPase cRac1A                                                |  | Gallus gallus (Chicken) | PF00071;                         |
| E6N1V8     | 417044;    | GNB2L1                    | Guanine nucleotide-binding protein beta subunit2-like 1      |  | Gallus gallus (Chicken) | PF00400;                         |
| Q5F4B4     | 419295;    | CREPT RPRD1B RCJMB04_1d17 | Cell-cycle related and expression-elevated protein in tumor  |  | Gallus gallus (Chicken) | PF04818;PF16566;                 |
| A0A1D5P4W0 | 429810;    | RCC1                      | Uncharacterized protein                                      |  | Gallus gallus (Chicken) | PF00415;                         |
| A0A1D5NZM5 | 419361;    | RCC2                      | Uncharacterized protein                                      |  | Gallus gallus (Chicken) | PF00415;                         |
| A0A1D5PF81 | 420213;    | RMDN1                     | Uncharacterized protein                                      |  | Gallus gallus (Chicken) |                                  |
| Q5ZIW8     | 423062;    | RRAS RCJMB04_23b19        | Uncharacterized protein                                      |  | Gallus gallus (Chicken) | PF00071;                         |
| E1BXF4     | 428602;    | RCN1                      | Uncharacterized protein                                      |  | Gallus gallus (Chicken) | PF13202;PF13499;                 |
| A0A1D5P5K2 | 378790;    | RTN4                      | Reticulon                                                    |  | Gallus gallus (Chicken) | PF02453;                         |
| A0A1D5PD62 | 378790;    | RTN4                      | Reticulon                                                    |  | Gallus gallus (Chicken) | PF02453;                         |
| A0A1D5PPG9 | 378790;    | RTN4                      | Reticulon                                                    |  | Gallus gallus (Chicken) | PF02453;                         |
| A0A3Q2U086 | 378790;    | RTN4                      | Reticulon                                                    |  | Gallus gallus (Chicken) | PF02453;                         |
| A0A1D5PN07 | 428865;    | ARHGAP1                   | Uncharacterized protein                                      |  | Gallus gallus (Chicken) | PF13716;PF00620;                 |
| A0A1D5PS30 | 428865;    | ARHGAP1                   | Uncharacterized protein                                      |  | Gallus gallus (Chicken) | PF13716;PF00620;                 |
| Q5ZMG8     | 422207;    | RHOGL RCJMB04_2b11        | Uncharacterized protein                                      |  | Gallus gallus (Chicken) | PF00071;                         |
| Q5ZIY8     | 423111;    | RNH1 RCJMB04_22k18        | Ribonuclease inhibitor (Ribonuclease/angiogenin inhibitor 1) |  | Gallus gallus (Chicken) | PF13516;PF18779;                 |
| F1NIX0     | 418568;    | RPL8                      | 60S ribosomal protein L8                                     |  | Gallus gallus (Chicken) | PF00181;PF03947;                 |
| F1P0K1     | 396414;    | RRBP1                     | Rib_recp_KP_reg domain-containing protein                    |  | Gallus gallus (Chicken) | PF05104;                         |
| A0A3Q3AZJ6 | 425789;    | RBM3                      | RRM domain-containing protein                                |  | Gallus gallus (Chicken) | PF00076;                         |
| Q45KQ2     | 425789;    |                           | Aggrecan promoter binding protein                            |  | Gallus gallus (Chicken) | PF00076;                         |
| Q5ZLU8     | 425789;    | RBM3 RCJMB04_4m1          | Cold-inducible RNA-binding protein                           |  | Gallus gallus (Chicken) | PF00076;                         |
| A0A1D5PFX6 | 404531;    | RBM12                     | Uncharacterized protein                                      |  | Gallus gallus (Chicken) | PF00076;                         |
| Q5ZMA3     | 420846;    | RBM24 RCJMB04_2i21        | RNA-binding protein 24 (RNA-binding motif protein 24)        |  | Gallus gallus (Chicken) | PF00076;                         |
| E1BZ17     | 420846;    | RBM24                     | RNA-binding protein 24                                       |  | Gallus gallus (Chicken) | PF00076;                         |

|            |            |                                       |                                                                                                                                                                                                                                                                           |  |                         |                          |
|------------|------------|---------------------------------------|---------------------------------------------------------------------------------------------------------------------------------------------------------------------------------------------------------------------------------------------------------------------------|--|-------------------------|--------------------------|
| Q5ZKQ9     | 422248;    | RBMX RCJMB04_9j22                     | RNA binding motif protein, X-linked                                                                                                                                                                                                                                       |  | Gallus gallus (Chicken) | PF08081;PF00076;         |
| A0A1D5NXB3 | 100859276; | LOC100859276                          | Uncharacterized protein                                                                                                                                                                                                                                                   |  | Gallus gallus (Chicken) | PF00076;PF00098;         |
| Q5ZMK3     | 421485;    | SCCPDH RCJMB04_1m12                   | Sacchrp_dh_NADP domain-containing protein                                                                                                                                                                                                                                 |  | Gallus gallus (Chicken) | PF03435;                 |
| Q5ZLP5     | 425058;    | SARNP RCJMB04_3i4<br>RCJMB04_5e24     | SAP domain-containing protein                                                                                                                                                                                                                                             |  | Gallus gallus (Chicken) | PF02037;                 |
| E1BZJ9     | 424739;    | SCLY                                  | Aminotran_5 domain-containing protein                                                                                                                                                                                                                                     |  | Gallus gallus (Chicken) | PF00266;                 |
| F1N876     | 426612;    | SEPHS2L                               | Selenide, water dikinase (EC 2.7.9.3)                                                                                                                                                                                                                                     |  | Gallus gallus (Chicken) | PF00586;PF02769;         |
| E1C8Y9     | 419815;    | SRSF3                                 | RRM domain-containing protein                                                                                                                                                                                                                                             |  | Gallus gallus (Chicken) | PF00076;                 |
| Q5ZJ59     | 419116;    | RCJMB04_20j14                         | Uncharacterized protein                                                                                                                                                                                                                                                   |  | Gallus gallus (Chicken) | PF00076;                 |
| P01005     | 416236;    |                                       | Ovomucoid (Allergen Gal d 1) (allergen Gal d 1)                                                                                                                                                                                                                           |  | Gallus gallus (Chicken) | PF00050;                 |
| Q6V9V7     | 378801;    |                                       | Serine/threonine kinase 25                                                                                                                                                                                                                                                |  | Gallus gallus (Chicken) | PF00069;                 |
| Q5ZMA7     | 422231;    | STK26 RCJMB04_2k24                    | Protein kinase domain-containing protein                                                                                                                                                                                                                                  |  | Gallus gallus (Chicken) | PF00069;                 |
| F1NQI6     | 421498;    | SDDCAG8                               | Uncharacterized protein                                                                                                                                                                                                                                                   |  | Gallus gallus (Chicken) | PF15964;                 |
| A0A1D5NZM0 | 424706;    | SERBP1                                | HABP4_PAI-RBP1 domain-containing protein                                                                                                                                                                                                                                  |  | Gallus gallus (Chicken) | PF04774;PF16174;         |
| Q5F3L2     | 424706;    | RCJMB04_14f6                          | HABP4_PAI-RBP1 domain-containing protein                                                                                                                                                                                                                                  |  | Gallus gallus (Chicken) | PF04774;PF16174;         |
| A0A1D5P3G5 | 424522;    | SH3GLB1                               | Endophilin-B1 (SH3 domain-containing GRB2-like protein B1)                                                                                                                                                                                                                |  | Gallus gallus (Chicken) | PF03114;PF14604;         |
| A0A1D5NWN5 | 548628;    | SIRT2                                 | Deacetylase sirtuin-type domain-containing protein                                                                                                                                                                                                                        |  | Gallus gallus (Chicken) | PF02146;                 |
| Q5ZID4     | 548628;    | RCJMB04_27m5                          | Deacetylase sirtuin-type domain-containing protein                                                                                                                                                                                                                        |  | Gallus gallus (Chicken) | PF02146;                 |
| F6R1X6     | 395268;    | SSB                                   | Uncharacterized protein                                                                                                                                                                                                                                                   |  | Gallus gallus (Chicken) | PF05383;PF00076;PF08777; |
| Q5ZM14     | 422108;    | SLC9A3R1 NHERF<br>NHERF1 RCJMB04_3g21 | Na(+)/H(+) exchange regulatory cofactor NHE-RF1 (NHERF-1) (Ezrin-radixin-moesin-binding phosphoprotein 50) (EBP50) (Regulatory cofactor of Na(+)/H(+) exchanger) (Sodium-hydrogen exchanger regulatory factor 1) (Solute carrier family 9 isoform A3 regulatory factor 1) |  | Gallus gallus (Chicken) | PF09007;PF00595;         |
| F1NQR2     | 416550;    | SLC9A3R2                              | Na(+)/H(+) exchange regulatory cofactor NHE-RF                                                                                                                                                                                                                            |  | Gallus gallus (Chicken) | PF09007;PF00595;         |
| Q5F463     | 503574;    | RCJMB04_2m11                          | Helicase_PWI domain-containing protein                                                                                                                                                                                                                                    |  | Gallus gallus (Chicken) | PF18149;                 |
| Q5ZM28     | 420538;    | RCJMB04_3f15                          | Uncharacterized protein                                                                                                                                                                                                                                                   |  | Gallus gallus (Chicken) | PF13202;PF13833;         |
| Q5ZIA3     | 421772;    | SNX3 RCJMB04_28m8                     | PX domain-containing protein                                                                                                                                                                                                                                              |  | Gallus gallus (Chicken) | PF00787;                 |
| Q5ZHT0     | 428704;    | RCJMB04_33j6                          | PX domain-containing protein                                                                                                                                                                                                                                              |  | Gallus gallus (Chicken) | PF00787;                 |
| F1NU16     | 427717;    | SF3A1                                 | Uncharacterized protein                                                                                                                                                                                                                                                   |  | Gallus gallus (Chicken) | PF12230;PF01805;PF00240; |
| A0A1D6UPS9 | 415680;    | SF3B3                                 | Uncharacterized protein                                                                                                                                                                                                                                                   |  | Gallus gallus (Chicken) | PF03178;PF10433;         |
| A0A1D5P8I3 | 395803;    | SFPQ                                  | Uncharacterized protein                                                                                                                                                                                                                                                   |  | Gallus gallus (Chicken) | PF08075;PF00076;         |
| Q5ZHV7     | 418871;    | SPRYD7 CLLD6<br>RCJMB04_32i12         | SPRY domain-containing protein 7 (Chronic lymphocytic leukemia deletion region gene 6 protein homolog) (CLL deletion region gene 6 protein homolog)                                                                                                                       |  | Gallus gallus (Chicken) | PF00622;                 |
| E1BQV7     | 423878;    | SLK                                   | Non-specific serine/threonine protein kinase (EC 2.7.11.1)                                                                                                                                                                                                                |  | Gallus gallus (Chicken) | PF00069;PF12474;         |
| E1BQK7     | 423889;    | SMNDC1                                | Tudor domain-containing protein                                                                                                                                                                                                                                           |  | Gallus gallus (Chicken) | PF06003;                 |
| Q5ZLP0     | 420047;    | RCJMB04_5f21                          | HMG box domain-containing protein                                                                                                                                                                                                                                         |  | Gallus gallus (Chicken) | PF00505;                 |
| Q5F4B2     | 423044;    | SWAP70 RCJMB04_1e1<br>RCJMB04_8b3     | Switch-associated protein 70 (SWAP-70)                                                                                                                                                                                                                                    |  | Gallus gallus (Chicken) | PF00169;                 |
| A0A1D5PJG4 | 421831;    | SYNCRIP                               | Uncharacterized protein                                                                                                                                                                                                                                                   |  | Gallus gallus (Chicken) | PF18360;PF00076;         |
| Q5ZLH7     | 421831;    | RCJMB04_6c17                          | Uncharacterized protein                                                                                                                                                                                                                                                   |  | Gallus gallus (Chicken) | PF18360;PF00076;         |

|            |         |                     |                                                                                                                                                                                               |  |                         |                                          |
|------------|---------|---------------------|-----------------------------------------------------------------------------------------------------------------------------------------------------------------------------------------------|--|-------------------------|------------------------------------------|
| P54939     | 395194; | TLN1 TLN            | Talin-1                                                                                                                                                                                       |  | Gallus gallus (Chicken) | PF16511;PF00373;PF01608;PF09141;PF08913; |
| A0A1L1RYE4 | 423134; | PGR2/3              | C-type lectin domain-containing protein                                                                                                                                                       |  | Gallus gallus (Chicken) | PF00059;                                 |
| A0A1D5P3H6 | 427816; | LOC427816           | Fibrinogen C-terminal domain-containing protein                                                                                                                                               |  | Gallus gallus (Chicken) | PF00147;                                 |
| E1C576     | 427114; | TTC37               | Uncharacterized protein                                                                                                                                                                       |  | Gallus gallus (Chicken) | PF13181;                                 |
| F1NLC7     | 772208; | TXNDC12             | Thioredoxin domain-containing protein 12 (EC 1.8.4.2)                                                                                                                                         |  | Gallus gallus (Chicken) |                                          |
| R4GMD9     | 417680; | TXNDC17             | Thioredoxin domain-containing protein 17                                                                                                                                                      |  | Gallus gallus (Chicken) | PF06110;                                 |
| A0A1D5NUH1 | 426854; | TXNL1               | PITH domain-containing protein                                                                                                                                                                |  | Gallus gallus (Chicken) | PF06201;PF00085;                         |
| F1P212     | 421027; | TMX3                | Thioredoxin domain-containing protein                                                                                                                                                         |  | Gallus gallus (Chicken) | PF00085;                                 |
| E1C6J9     | 378897; | THY1                | Thy-1 antigen (Thy-1 membrane glycoprotein)                                                                                                                                                   |  | Gallus gallus (Chicken) | PF00047;                                 |
| Q90679     | 374161; | THYN1 THY28         | Thymocyte nuclear protein 1 (Thymocyte protein Thy28) (cThy28)                                                                                                                                |  | Gallus gallus (Chicken) | PF01878;                                 |
| A0A1D5PEL7 | 374161; | THYN1               | Thymocyte nuclear protein 1                                                                                                                                                                   |  | Gallus gallus (Chicken) | PF01878;                                 |
| Q8AYT2     | 373888; | tfam RCJMB04_9a18   | Mitochondrial transcription factor A                                                                                                                                                          |  | Gallus gallus (Chicken) | PF00505;                                 |
| Q5ZLY6     | 420618; | RCJMB04_4g4         | RRM domain-containing protein                                                                                                                                                                 |  | Gallus gallus (Chicken) | PF00076;                                 |
| Q9DDU8     | 395403; | TRA2B               | Transformer-2 beta                                                                                                                                                                            |  | Gallus gallus (Chicken) | PF00076;                                 |
| O42390     | 395897; |                     | Transforming growth factor-beta-induced protein ig-h3                                                                                                                                         |  | Gallus gallus (Chicken) | PF02469;                                 |
| F1P1A5     | 415991; | TKTL1               | TRANSKETOLASE_1 domain-containing protein                                                                                                                                                     |  | Gallus gallus (Chicken) | PF02779;PF02780;PF00456;                 |
| A0A3Q2UB54 | 428387; | TMEM65              | Uncharacterized protein                                                                                                                                                                       |  | Gallus gallus (Chicken) | PF10507;                                 |
| Q5ZKY6     | 428387; | TMEM65 RCJMB04_8k18 | Uncharacterized protein                                                                                                                                                                       |  | Gallus gallus (Chicken) | PF10507;                                 |
| A0A3Q3AHG4 | 427218; | TNPO1               | Importin N-terminal domain-containing protein                                                                                                                                                 |  | Gallus gallus (Chicken) | PF03810;                                 |
| Q5ZLY3     | 415421; | TMOD3 RCJMB04_4g21  | Uncharacterized protein                                                                                                                                                                       |  | Gallus gallus (Chicken) | PF03250;                                 |
| Q5F3V1     | 418227; | RCJMB04_6f15        | Uncharacterized protein                                                                                                                                                                       |  | Gallus gallus (Chicken) | PF03133;                                 |
| F1P582     | 427009; | UQCRC2              | Uncharacterized protein                                                                                                                                                                       |  | Gallus gallus (Chicken) | PF00675;PF05193;                         |
| R4GJH4     | 423032; | USP47               | Ubiquitin carboxyl-terminal hydrolase 47                                                                                                                                                      |  | Gallus gallus (Chicken) | PF14560;PF00443;                         |
| R9PXM3     | 423032; | USP47               | Ubiquitin carboxyl-terminal hydrolase 47                                                                                                                                                      |  | Gallus gallus (Chicken) | PF14560;PF00443;                         |
| A0A1D5P7D1 | 417295; | UAP1L1              | Uncharacterized protein                                                                                                                                                                       |  | Gallus gallus (Chicken) | PF01704;                                 |
| E1C856     | 418242; | UPK3A               | Uncharacterized protein                                                                                                                                                                       |  | Gallus gallus (Chicken) |                                          |
| A0A1L1RPC6 | 768928; | VAPA                | MSP domain-containing protein                                                                                                                                                                 |  | Gallus gallus (Chicken) | PF00635;                                 |
| Q5F419     | 768928; | RCJMB04_3m23        | MSP domain-containing protein                                                                                                                                                                 |  | Gallus gallus (Chicken) | PF00635;                                 |
| Q5ZJJ3     | 419317; | RCJMB04_17k23       | MSP domain-containing protein                                                                                                                                                                 |  | Gallus gallus (Chicken) | PF00635;                                 |
| Q90953     | 395565; | VCAN CSPG2          | Versican core protein (Chondroitin sulfate proteoglycan core protein 2) (Chondroitin sulfate proteoglycan 2) (Large fibroblast proteoglycan) (PG-M)                                           |  | Gallus gallus (Chicken) | PF00008;PF00059;PF00084;PF07686;PF00193; |
| P87498     | 424547; | VTG1 VTGI           | Vitellogenin-1 (Minor vitellogenin) (Vitellogenin I) [Cleaved into: Lipovitellin-1 (Lipovitellin I) (LVI); Phosvitin (PV); Lipovitellin-2 (Lipovitellin II) (LVII); YGP42 (allergen Gal d 6)] |  | Gallus gallus (Chicken) | PF09172;PF09175;PF01347;PF00094;         |
| P02845     | 424533; | VTG2 VTGII          | Vitellogenin-2 (Major vitellogenin) (Vitellogenin II) [Cleaved into: Lipovitellin-1 (Lipovitellin I) (LVI); Phosvitin (PV); Lipovitellin-2 (Lipovitellin II) (LVII); YGP40]                   |  | Gallus gallus (Chicken) | PF09172;PF09175;PF01347;PF00094;         |
| O12945     | 395935; |                     | Vitronectin                                                                                                                                                                                   |  | Gallus gallus (Chicken) | PF00045;PF01033;                         |
| F5XVB5     | 419031; | VWF                 | von Willebrand factor                                                                                                                                                                         |  | Gallus gallus (Chicken) | PF08742;PF01826;PF00092;PF00093;PF00094; |

|            |         |                   |                                             |  |                         |                  |
|------------|---------|-------------------|---------------------------------------------|--|-------------------------|------------------|
| Q5ZMB6     | 423443; | RCJMB04_2j15      | Protein kinase domain-containing protein    |  | Gallus gallus (Chicken) | PF00069;         |
| Q5ZLD5     | 419865; | RCJMB04_6k8       | WD_REPEATS_REGION domain-containing protein |  | Gallus gallus (Chicken) | PF00400;         |
| Q5F457     | 418829; | WBP4 RCJMB04_3a20 | WW domain-binding protein 4 (WBP-4)         |  | Gallus gallus (Chicken) | PF00397;PF06220; |
| A0A1D5PN25 | 386575; | YBX1              | Y-box-binding protein 1                     |  | Gallus gallus (Chicken) | PF00313;         |
| Q91956     | 386575; |                   | CSD domain-containing protein               |  | Gallus gallus (Chicken) | PF00313;         |
| A0A3Q3A9V6 | 422301; | ZNF185L           | LIM zinc-binding domain-containing protein  |  | Gallus gallus (Chicken) |                  |
| A0A1D5PMM8 | 417413; | ZNF207            | Uncharacterized protein                     |  | Gallus gallus (Chicken) |                  |
| A0A1D5PN34 | 417413; | ZNF207            | Uncharacterized protein                     |  | Gallus gallus (Chicken) |                  |
| A0A1L1RNP9 | 417413; | ZNF207            | Uncharacterized protein                     |  | Gallus gallus (Chicken) |                  |
| F1NR17     | 422841; | ZNF518B           | Uncharacterized protein                     |  | Gallus gallus (Chicken) |                  |
