# Supplementary material for: Proteomic Analysis of Chicken Chorioallantoic Membrane (CAM) during Embryonic Development Provides Functional Insight
Source: Hindawi journal article supplement (doi:10.1155/2022/7813921), 2022-01-01
Supplement: f6 [file 7813921.f6.pdf]

**Table S6.** Functional annotation analysis of the identified CAM protein constituents common to ED12 and ED19, and absent from EBS.

| Cluster No. | GO term                                                     | No. of proteins | Official gene symbol                                                                                                                                                                                                                                                                                                                                                                                                                                                                                                                                                                                                                                                                                                                  |
|-------------|-------------------------------------------------------------|-----------------|---------------------------------------------------------------------------------------------------------------------------------------------------------------------------------------------------------------------------------------------------------------------------------------------------------------------------------------------------------------------------------------------------------------------------------------------------------------------------------------------------------------------------------------------------------------------------------------------------------------------------------------------------------------------------------------------------------------------------------------|
| 1           | GO:0,000,166 Nucleotide binding                             | 102             | ACAD9, ACADL, ACTA2, AK1, AKT1, ARL8B, ASNS, ARF6, ATL1, ATP2A2, CAMK2D, CARS, CDC42, CDK5, CHTF18, CSK, CSNK2A1, DES, DLD, DNM1L, DYNC1H1, DYNC1LI1, EFTUD2, EHD3, ETFA, FMO3, GALK2, GARS, GLUD2, GMPS, GNA11, GNAI2, GNAI3, GNAS, GRPEL1, GSK3A, GSR, HARS, HIBADH, HK1, HRAS, HSP90AB1, HSP90B1, HYOU1, IARS2, IDH3A, IGF2BP1, IGF2BP3, ILF2, ILK, LONP1, MAPK3, MAPK14, MATR3, MCM6, MYLK, MYH11, MYO1B, MYO1C, MYO6, NARS, NDUFA10, NDUFV1, NDUFV2, NT5C1B, NT5C2, PC, POLQ, POR, PSMC5, RRAGA, PRKAR1A, PYGL, RAB5A, RAB6A, RAB10, RAB18, RAB22A, RAB32, RBM25, RHOA, RHOG, RRAS, SAR1A, SDHA, SEPHS1, SEPT2L, SEPT6, SEPT7, SEPTIN8, SEPTIN9, SEPTIN11, SIRT2, SIRT5, SRC, SUCLA2, SYNCRIP, TUBB2A, TUBB2B, UBA2, UBA7, VPS4B |
| 2           | GO:0,005,198 Structural molecule activity                   | 41              | ANXA1, ASL2, CLDN1, CLTB, COL1A1, COL1A2, COL3A1, COL4A1, COL4A2, COL11A1, COL12A1, COL18A1, COPG1, DES, KRT7, KRT14, LAMA1, LAMC1, MYH11, RPL3, RPL4, RPL6, RPL13, RPL14, RPL15, RPL17, RPL18A, RPL21, RPL26L1, RPL31, RPL36, RPS6, RPS11, RPS12, RPS14, RPS15A, RPS17, TUBB2A, TUBB2B, VAPA, VMO1                                                                                                                                                                                                                                                                                                                                                                                                                                   |
| 3           | GO:0,008,104 Protein localization                           | 32              | AKAP12, AKT1, AP1M1, AP2A2, AP2M1, ARF6, CAV1, CDC42, CHMP6, CLTB, COPG1, CTNNB1, GRPEL1, HSPG2, KPNA4, MYO6, PCNA, RAB5A, RAB6A, RAB10, RAB18, RAB22A, RAB32, RRBP1, SAR1A, SEC61A1, STXBP1, VAMP7, VPS29, USO1, XPO1, YWHAH                                                                                                                                                                                                                                                                                                                                                                                                                                                                                                         |
| 4           | GO:0,007,242 Intracellular signaling cascade                | 29              | AKT1, ARF6, ARL8B, CAV1, CDC42, COL1A2, CSK, GNA11, GNAI2, GNAS, GNB1, HACD3, HRAS, MAPK3, MAPK14, MYO6, RRAS, RAB5A, RAB6A, RAB10, RAB18, RAB22A, RAB32, RPS6, RHOA, RHOG, STMN1, STAT3, YWHAH                                                                                                                                                                                                                                                                                                                                                                                                                                                                                                                                       |
| 5           | GO:0,016,192 Vesicle-mediated transport                     | 26              | AP1M1, AP2A2, AP2M1, ARF6, CLTB, COLEC12, COPG1, CTNNB1, GARS, HRAS, ITGAV, MYH11, MYO6, RAB5A, RAB6A, RAB22A, RER1, SAR1A, SCFD1, SH3GL1, STXBP1, TMED10, TRAPPC3, USO1, VAMP7, VPS4B                                                                                                                                                                                                                                                                                                                                                                                                                                                                                                                                                |
| 6           | GO:0,006,412 Translation                                    | 24              | CARS, EIF1AD, GARS, HARS, IARS2, NARS, RPL3, RPL4, RPL6, RPL13, RPL14, RPL15, RPL17, RPL18A, RPL21, RPL26L1, RPL31, RPL36, RPS6, RPS11, RPS12, RPS15A, RPS17, RPS14                                                                                                                                                                                                                                                                                                                                                                                                                                                                                                                                                                   |
| 7           | GO:0,006,091 Generation of precursor metabolites and energy | 24              | ACO2, AKT1, ATP5C1, ATP5PB, ATP5O, ATP6V1E1, CYCS, DLD, DLST, ETFDH, FH, GNAS, GNPDA1, HK1, IDH3A, NDUFA7, NDUFB8, NDUFS1, NDUFS4, PGAM1, PYGL, SDHA, SLC25A13, UQCRCF1                                                                                                                                                                                                                                                                                                                                                                                                                                                                                                                                                               |
| 8           | GO:0,046,907 Intracellular transport                        | 22              | AKAP12, AKT1, AP1M1, AP2A2, AP2M1, CLTB, COPG1, GRPEL1, KPNA4, MYO6, PCNA, RER1, SAR1A, SLC25A13, TMED10, TRAPPC3, UCHL1, USO1, VAMP7, VPS4B, XPO1, YWHAH                                                                                                                                                                                                                                                                                                                                                                                                                                                                                                                                                                             |
| 9           | GO:0,003,735 Structural constituent of ribosome             | 18              | RPL3, RPL4, RPL6, RPL13, RPL14, RPL15, RPL17, RPL18A, RPL21, RPL26L1, RPL31, RPL36, RPS6, RPS11, RPS12, RPS14, RPS15A, RPS17                                                                                                                                                                                                                                                                                                                                                                                                                                                                                                                                                                                                          |
| 10          | GO:0,042,802 Identical protein binding                      | 18              | AKT1, ALDH1A3, CLDN1, COL1A2, GRPEL1, HDAC1, HINT2, HPRT1, HSPB1, ITGB3, LCP1, MCM6, MYO6, NRP1, PRRC1, OSTF1, S100A11, SNX32                                                                                                                                                                                                                                                                                                                                                                                                                                                                                                                                                                                                         |
| 11          | GO:0,007,010 Cytoskeleton organization                      | 15              | ARF6, CAPZA2, CDC42, CNN1, CNN2, CTNNB1, EZR, HRAS, ITGB1, KRT14, LCP1, MYH11, PFN2, RHOA, THY1                                                                                                                                                                                                                                                                                                                                                                                                                                                                                                                                                                                                                                       |

|    |                                                                     |    |                                                                                                              |
|----|---------------------------------------------------------------------|----|--------------------------------------------------------------------------------------------------------------|
| 12 | GO:0,032,989 Cellular component morphogenesis                       | 15 | <i>CDC42, CNP, CTNNB1, EZR, HPRT1, ILK, ITGB1, LAMA1, LAMC1, MAPK14, MYH11, NRP1, RHOA, STMN1, UCHL1</i>     |
| 13 | GO:0,004,857 Enzyme inhibitor activity                              | 14 | <i>A2ML1, ANXA1, ANXA2, COL6A3, CST3, CSTB, OVALX, OVALY, OVST, RNH1, SERPINH1, SERPINB6, SPINK5, SPINK7</i> |
| 14 | GO:0,030,029 Actin filament-based process                           | 13 | <i>ARF6, CDC42, CNN1, CNN2, CAPZA2, EZR, HRAS, ITGB1, LCP1, MYH11, MYO6, PFN2, RHOA</i>                      |
| 15 | GO:0,005,996 Monosaccharide metabolic process                       | 13 | <i>AKT1, FUCA2, GALE, GALK2, GNPDA1, HIBADH, HK1, MAPK14, PC, PGAM1, PGM1, PMM2, PYGL</i>                    |
| 16 | GO:0,001,944 Vasculature development                                | 13 | <i>AKT1, ANXA2, CAV1, COL1A2, CTNNB1, ITGAV, MAPK14, MMP2, NRP1, POFUT1, QKI, RTN4, THY1</i>                 |
| 17 | GO:0,033,043 Regulation of organelle organization                   | 11 | <i>ARF6, ARPC1B, ARPC2, CAPZA2, CDC42, CTNNB1, HSPB1, MAP4, RHOA, STMN1, XPO1</i>                            |
| 18 | GO:0,030,030 Cell projection organization                           | 11 | <i>ARF6, CDC42, CNP, HPRT1, ITGA6, ITGA8, MYH11, MYO6, NRP1, STMN1, UCHL1</i>                                |
| 19 | GO:0,046,034 ATP metabolic process                                  | 10 | <i>AK1, ATP1B1, ATP1B3, ATP2A2, ATP5C1, ATP5O, ATP5PB, ATP6V1E1, NDUFS1, VPS4B</i>                           |
| 20 | GO:0,016,044 Membrane organization                                  | 10 | <i>COLEC12, ITGAV, HRAS, MYH11, MYO6, RAB5A, RAB22A, SH3GL1, USO1, VAMP7</i>                                 |
| 21 | GO:0,051,186 Cofactor metabolic process                             | 10 | <i>ACO2, BAAT, COQ4, DBT, DLST, FH, HIBADH, HMOX2, IDH3A, SDHA</i>                                           |
| 22 | GO:0,051,129 Negative regulation of cellular component organization | 10 | <i>CAPZA2, CDC42, CLU, HSPB1, MAP4, NRP1, RTN4, STMN1, THY1, YWHAH</i>                                       |
| 23 | GO:0,045,596 Negative regulation of cell differentiation            | 10 | <i>CAV1, CTNNB1, ITGAV, ITGB1, ITGB3, MAPK3, NRP1, RTN4, THY1, YWHAH</i>                                     |
| 24 | GO:0,016,651 Oxidoreductase activity, acting on NADH or NADPH       | 9  | <i>DLD, NDUFA7, NDUFA12, NDUFB8, NDUFS1, NDUFS3, NDUFS4, NDUFS8, NDUFV1</i>                                  |
| 25 | GO:0,044,087 Regulation of cellular component biogenesis            | 9  | <i>ARF6, ARPC1B, ARPC2, CAPZA2, CDC42, CLU, HSPB1, RHOA, STMN1</i>                                           |
| 26 | GO:0,031,589 Cell-substrate adhesion                                | 8  | <i>CTNNB1, ITGA6, ITGB1, ITGB3, LAMC1, NID1, RHOA, THY1</i>                                                  |
| 27 | GO:0,006,631 Fatty acid metabolic process                           | 7  | <i>ETFDH, FASN, HADH, HADHA, MAPK14, QKI, RNPEP</i>                                                          |
| 28 | GO:0,008,238 Exopeptidase activity                                  | 7  | <i>CTSA, ERAP1, LAP3, METAP2, PEPD, RNPEP, SCPEP1</i>                                                        |
| 29 | GO:0,051,539 4 iron, 4 sulfur cluster binding                       | 5  | <i>ACO2, ETFDH, NDUFS1, NDUFS8, NDUFV1</i>                                                                   |
| 30 | GO:0,042,773 ATP synthesis coupled electron transport               | 4  | <i>DLD, NDUFA7, NDUFB8, NDUFS1</i>                                                                           |
| 31 | GO:0,034,330 Cell junction organization                             | 4  | <i>CDC42, ITGB3, LAMC1, THY1</i>                                                                             |

|    |                                                                                                              |   |                                           |
|----|--------------------------------------------------------------------------------------------------------------|---|-------------------------------------------|
| 32 | GO:0,016,620 Oxidoreductase activity, acting on the aldehyde or oxo group of donors, NAD or NADP as acceptor | 4 | <i>ALDH1A3, ALDH3A2, ALDH3B2, ALDH5A1</i> |
| 33 | GO:0,032,369 Negative regulation of lipid transport                                                          | 3 | <i>AKT1, ITGB3, ITGAV</i>                 |

---
