# Supplementary material for: Proteomic Analysis of Chicken Chorioallantoic Membrane (CAM) during Embryonic Development Provides Functional Insight
Source: Hindawi journal article supplement (doi:10.1155/2022/7813921), 2022-01-01
Supplement: f7 [file 7813921.f7.pdf]

**Table S7.** Functional annotation analysis of the identified CAM protein constituents specific to either ED12 or ED19, and absent from EBS.

| CAM (days)    | Cluster No. | GO term                                                           | No. of proteins | Official gene symbol                                                                                |
|---------------|-------------|-------------------------------------------------------------------|-----------------|-----------------------------------------------------------------------------------------------------|
| CAM<br>(ED12) | 1           | GO:0,055,114 Oxidation reduction                                  | 11              | <i>ACADSB, BDH1A, DHFR, KDM1A, LOC415661, P3H1, P3H3, P4HA1, PLOD2, PRCP, PYGR1</i>                 |
|               | 2           | GO:0,034,621 Cellular macromolecular complex subunit organization | 7               | <i>ENAH, H2AFY, HIST1H4B, MRPL58, SNAP91, TUBAL3, TUBB6</i>                                         |
|               | 3           | GO:0,031,406 Carboxylic acid binding                              | 5               | <i>P3H1, P3H3, P4HA1, PLOD2, SH3GLB1</i>                                                            |
|               | 4           | GO:0,019,842 Vitamin binding                                      | 5               | <i>P3H1, P3H3, P4HA1, PLOD2, SCLY</i>                                                               |
|               | 5           | GO:0,007,015 Actin filament organization                          | 3               | <i>ENAH, NCK1, PDLIM3</i>                                                                           |
| CAM<br>(ED19) | 1           | GO:0,016,310 Phosphorylation                                      | 12              | <i>ATP6V0A4, ATP6V1C2, CASK, LOC776719, MAP2K2, PDPK1, PRKCD, ROCK1, ROCK2, RPS6KA3, SLK, STK25</i> |
|               | 2           | GO:0,007,264 Small GTPase mediated signal transduction            | 5               | <i>CDH13, RAP2A, RAB4A, RAB8A, RHEB</i>                                                             |
|               | 3           | GO:0,004,857 Enzyme inhibitor activity                            | 5               | <i>CD109, CST7, SERPINB10B, SERPINB1, TIMP3</i>                                                     |
