# Supplementary material for: Proteomic Analysis of Chicken Chorioallantoic Membrane (CAM) during Embryonic Development Provides Functional Insight
Source: Hindawi journal article supplement (doi:10.1155/2022/7813921), 2022-01-01
Supplement: f8 [file 7813921.f8.pdf]

**Table S8.** Functional annotation analysis of the identified EBS protein constituents.

| Cluster No. | GO term                                                          | No. of proteins | Official gene symbol                                                                                                                                                                                                                                                                                                                                                                                                                                                                                                                                                                                                                                                                                                                                                                                                                                                                                                                                                                                                                                                                                                        |
|-------------|------------------------------------------------------------------|-----------------|-----------------------------------------------------------------------------------------------------------------------------------------------------------------------------------------------------------------------------------------------------------------------------------------------------------------------------------------------------------------------------------------------------------------------------------------------------------------------------------------------------------------------------------------------------------------------------------------------------------------------------------------------------------------------------------------------------------------------------------------------------------------------------------------------------------------------------------------------------------------------------------------------------------------------------------------------------------------------------------------------------------------------------------------------------------------------------------------------------------------------------|
| 1           | GO:0,000,166 Nucleotide binding                                  | 157             | AARS1, ABCB10, ABCE1, ACSS1A, ACTBL2, ACTC1, ACTG1, ACTL6A, ACTR1A, ACTR2, ACTR3, ACLY, ADSS1, AK2, ALYREF, APAF1, ATP1A1, ATP5B, ATP6V1A, CAT, CCT2, CCT3, CCT4, CCT5, CCT6A, CCT7, CCT8, CKB, CMPK1, CPSF6, CTBP1, DARS, DAZAP1, DDX1, DDX3X, DDX6, DDX17, DDX19, DHX15, EEF1A1, EEF2, EFL1, EIF2S3, EIF4A2, EIF4A3, EIF4H, EIF5B, ELAVL1, EPRS, FARSB, FKBP4, FUS, G3BP1, GAPDH, GART, GNAL, GNA14, GPD1L, GSS, HK2, HAO2, HNRNPA1, HNRNPA2B1, HNRNPAB, HNRNPD, HNRNPDL, HNRNPH1, HNRNPH3, HNRNPM, HNRNPUL2, HSP90AA1, HSPA2, HSPA4L, HSPA5, HSPA8, HSPA9, HSPD1, HSPE1, IDH1, IDH2, KARS, LOC420368, MAST2, MOV10, MTHFD1, MYH1F, MYH9, MYH10, NACA, NCL, NME2, NONO, OLA1, PABPC1, PAICS, PGD, PKLR, PGK2, PFKP, PSMC1, PSMC2, PSMC3, PSMC6, PTBP1, PUF60, QARS, RAB1B, RAP1B, RAB8B, RAB9A, RAB11B, RAB14, RAB2A, RAB5C, RAB21, RAC1, RALY, RAN, RBM3, RARS, RAP1A, RBM12, RMB24, RBMXL1, RUVBL1, SARS1, SFPQ, SMC1A, SMC2, SMC3, SMC4, SNRNP200, SRSF1, SRSF2, SRSF3, SRSF6, SSB, STK26, TARS, TCP1, TOP2B, TUFM, TRA2A, TRA2B, TTN, TUBA1A, TUBA3E, TUBA8B, TUBB, TUBB1, TUBB4B, UBA3, UBE2I, UGDH, VCP, VRK1, YARS |
| 2           | GO:0,006,508 Proteolysis                                         | 45              | APEH, BLMH, C3, CAPN1, CASP3, CNDP2, DDB1, DDI2, DNPEP, LTA4H, MYH9, NPEPL1, NPEPPS, PCNP, PLG, PM20D1, PREP, PSMA1, PSMA2, PSMA3, PSMA4, PSMA5, PSMA6, PSMA7, PSMB1, PSMB2, PSMB4, PSMB5, PSMB7, PSMC2, RAD23B, TPP2, UBE2H, UBE2I, UBE2L3, UBE2N, UBE2V2, UCHL3, UCHL5, UFD1L, UFSP2, USP7, USP9Y, USP47, XPNPEP1                                                                                                                                                                                                                                                                                                                                                                                                                                                                                                                                                                                                                                                                                                                                                                                                         |
| 3           | GO:0,009,057 Macromolecule catabolic process                     | 39              | APOB, CASP3, DDB1, EIF3E, EIF4A3, FEN1, LYG2, MYH9, PCNP, PSMA1, PSMA2, PSMA3, PSMA4, PSMA5, PSMA6, PSMA7, PSMB1, PSMB2, PSMB4, PSMB5, PSMB7, PSMC1, PSMC2, PSMC3, PSMC6, RAD23B, SOD1, UBE2H, UBE2I, UBE2L3, UBE2N, UBE2V2, UCHL3, UCHL5, UFD1L, UFSP2, USP7, USP9Y, USP47                                                                                                                                                                                                                                                                                                                                                                                                                                                                                                                                                                                                                                                                                                                                                                                                                                                 |
| 4           | GO:0,008,104 Protein localization                                | 33              | ACTN4, APOB, ARCN1, BID, CLTC, COPA, COPB1, ERP29, GDI1, HSPA9, LIN7C, MYH9, NPM1, PLEK, RAB2A, RAB5C, RAB8B, RAB9A, RAB11B, RAB14, RAB21, RAN, RDX, SCAMP2, SNX2, SEC22B, TLN1, XPO7, YWHAB, YWHAE, YWHAG, YWHAQ, YWHAZ                                                                                                                                                                                                                                                                                                                                                                                                                                                                                                                                                                                                                                                                                                                                                                                                                                                                                                    |
| 5           | GO:0,065,003 Macromolecular complex assembly                     | 31              | APOA4, ALDOB, ARPC4, CAT, FGA, FGB, FGG, FKBP4, GSN, H1F0, H2AZ2, HIST1H111L, HIST1H111R, HIST1H2A4, HIST1H2B7, HIST1H2B8, HIST2H4B, HP1BP3, LOC769852, MYH10, NAP1L4, NPM1, SET, SOD2, TUBA1A, TUBA3E, TUBA8B, TUBB, TUBB1, TUBB4B, XPO7                                                                                                                                                                                                                                                                                                                                                                                                                                                                                                                                                                                                                                                                                                                                                                                                                                                                                   |
| 6           | GO:0,006,091 Generation of precursor metabolites and energy      | 30              | ACO1, ATP5B, ATP5A1W, ATP6V1A, ATP6V1B2, ATP6V1H, ALDOB, ALDOC, BPGM, CAT, CYB5A, ENO1, GAPDH, GLRX, GOT1, GPI, HK2, LDHA, LDHB, MDH1, MDH2, OGDH, PDHA2, PFKP, PGK2, PKLR, PPP1CB, SOD2, TPI1, TXN                                                                                                                                                                                                                                                                                                                                                                                                                                                                                                                                                                                                                                                                                                                                                                                                                                                                                                                         |
| 7           | GO:0,070,011 Peptidase activity, acting on L-amino acid peptides | 30              | APEH, BLMH, CAPN1, CASP3, CNDP2, COPS5, DDI2, DNPEP, LTA4H, NPEPL1, NPEPPS, PLG, PM20D1, PREP, PSMA1, PSMA2, PSMA3, PSMA4, PSMA5, PSMA6, PSMA7, PSMB1, PSMB2, PSMB4, PSMB5, PSMB7, TPP2, UFSP2, USP7, XPNPEP1                                                                                                                                                                                                                                                                                                                                                                                                                                                                                                                                                                                                                                                                                                                                                                                                                                                                                                               |
| 8           | GO:0,005,525 GTP binding                                         | 30              | ADSS1, EEF1A1, EEF2, EFL1, EIF5B, EIF2S3, FKBP4, GNA14, GNAL, LOC420368, OLA1, RAB11B, RAB1B, RAB2A, RAB5C, RAB8B, RAB9A, RAB14, RAB21, RAC1, RAN, RAP1A, RAP1B, TUBA1A, TUBA3E, TUBA8B, TUBB, TUBB1, TUBB4B, TUFM                                                                                                                                                                                                                                                                                                                                                                                                                                                                                                                                                                                                                                                                                                                                                                                                                                                                                                          |
| 9           | GO:0,042,592 Homeostatic process                                 | 30              | ACO1, ADD1, APOA4, APOB, BCL2L1, CASP3, GCLM, GLRX, GLRX3, GOT1, FTH1, HBZ, NPM1, P4HB, PARK7, PDIA3, PDIA4, PDIA6, PLG, PRDX1, PRDX6, RHAG, RPA1, RBP4A, SOD1, SOD2,                                                                                                                                                                                                                                                                                                                                                                                                                                                                                                                                                                                                                                                                                                                                                                                                                                                                                                                                                       |

|    |                                                                |    | <i>TCEA1, TF, TMX4, TXN</i>                                                                                                                                                                                |
|----|----------------------------------------------------------------|----|------------------------------------------------------------------------------------------------------------------------------------------------------------------------------------------------------------|
| 10 | GO:0,044,271 Nitrogen compound biosynthetic process            | 28 | <i>ADA, ADAL, ADK, ADSL, ADSS1, AMPD3, ATIC, ATP5B, ATP1A1, ATP5A1W, ATP6V1A, ATP6V1B2, ATP6V1H, CBSL, CMPK1, CPOX, FECH, GART, GOT1, GOT2, HMBS, NME2, PAICS, PRPS1L1, PRPSAP2, TMLHE, UMPS, UROD</i>     |
| 11 | GO:0,051,276 Chromosome organization                           | 25 | <i>BRE, BUB3, H1FO, H2AZ2, HIST1H111L, HIST1H111R, HIST1H2A4, HIST1H2B7, HIST1H2B8, HIST2H4B, HP1BP3, LOC769852, NCAPD2, NAP1L4, NPM1, PDS5B, RPA1, RBBP4, RUVBL1, SET, SMC1A, SMC2, SMC3, SMC4, UBE2N</i> |
| 12 | GO:0,016,052 Carbohydrate catabolic process                    | 23 | <i>AKR1A1, ALDOB, ALDOC, BPGM, ENO1, GAPDH, GPD1L, GPI, HK2, LDHA, LDHB, LYG2, MDH1, MDH2, OGDH, PDHA2, PFKP, PGD, PGK2, PGLS, PKLR, TALDO1, TPI1</i>                                                      |
| 13 | GO:0,005,996 Monosaccharide metabolic process                  | 23 | <i>AKR1A1, BPGM, ALDOB, ALDOC, ENO1, GAPDH, GPI, HK2, LDHA, LDHB, MDH1, MDH2, OGDH, PDHA2, PFKP, PGD, PGLS, PGK2, PKLR, RBP4A, TPI1, PPP1CB, TALDO1</i>                                                    |
| 14 | GO:0,046,907 Intracellular transport                           | 23 | <i>ACTBL2, ACTC1, ARCN1, BCL2L1, BID, CLTC, COPA, COPB1, HSPA9, MYH9, NPM1, NUP133, NUP155, BAFAH1B1, RAN, RANBP1, SNX2, XPO7, YWHAB, YWHAE, YWHAG, YWHAQ, YWHAZ</i>                                       |
| 15 | GO:0,042,981 Regulation of apoptosis                           | 23 | <i>AARS1, ADA, ALB, API5, APAF1, BCL2L1, BID, CAT, CIAPIN1, EEF1A1, FADD, HSPA5, CASP3, GAPDH, GCLM, HSPD1, NME2, PDIA3, PGP, PLG, RPS3, SOD1, SOD2</i>                                                    |
| 16 | GO:0,016,887 ATPase activity                                   | 23 | <i>ACTBL2, ABCB10, ABCE1, ACTC1, ATP1A1, ATP5A1W, ATP5B, ATP6V1A, ATP6V1B2, ATP6V1H, DDX1, DDX3X, DDX6, DDX17, DDX19, DHX15, EIF4A2, EIF4A3, HSPA8, MYH9, PSMC2, RBBP4, SNRNP200</i>                       |
| 17 | GO:0,042,802 Identical protein binding                         | 21 | <i>ACTG1, ADH4, ALDOB, APOA4, ARHGDI, BCL2L1, CAT, ELAVL1, FBP1, GPD1L, HSP90AA1, MYH9, NFS1, NONO, NPM1, PAFAH1B1, PLEK, PSMA7, TPD52, TRA2A, VAPB</i>                                                    |
| 18 | GO:0,006,396 RNA processing                                    | 20 | <i>AARS1, CPSF6, CSTF3, EIFA3, HNRNPCL, MAGOH, MOV10, PRPF19, PTBP1, RPL10A, SF3A1, SNRNP200, SNRPE, SRSF1, SRSF2, SSB, STRAP, TRA2A, WBP4, YBX1</i>                                                       |
| 19 | GO:0,007,010 Cytoskeleton organization                         | 20 | <i>ACTBL2, ACTC1, ACTG1, ARPC4, CAPZA1, CAPZB, EPB41, GSN, KRT24, MYH9, MYH10, NPM1, PLEK, RAC1, BAFAH1B1, RANBP1, SMC3, SOD1, TLN1, TUBB1</i>                                                             |
| 20 | GO:0,033,554 Cellular response to stress                       | 20 | <i>AARS1, ALB, APOA4, BRE, CASP3, CAT, EIF2S1, DDB1, FEN1, HMGB2, HSPA5, PRPF19, RAD23B, RPA1, RPS3, SOD1, SOD2, UBE2N, UBE2V2, VAPB</i>                                                                   |
| 21 | GO:0,016,071 mRNA metabolic process                            | 18 | <i>CPSF6, CSTF3, EIF3E, EIFA3, ELAVL1, HNRNPD, HNRNPCL, MAGOH, MOV10, PRPF19, PTBP1, SNRPE, SRSF1, SRSF2, STRAP, TRA2A, WBP4, YBX1</i>                                                                     |
| 22 | GO:0,042,623 ATPase activity, coupled                          | 18 | <i>ABCB10, ATP1A1, ATP5A1W, ATP5B, ATP6V1A, ATP6V1B2, ATP6V1H, DDX1, DDX3X, DDX6, DDX17, DDX19, DHX15, EIF4A2, EIF4A3, HSPA8, RBBP4, SNRNP200</i>                                                          |
| 23 | GO:0,009,259 Ribonucleotide metabolic process                  | 18 | <i>ADA, ADAL, ADSL, AMPD3, ATIC, ATP5B, ATP1A1, ATP5A1W, ATP6V1A, ATP6V1B2, ATP6V1H, ENTPD1, GART, NME2, OLA1, PAICS, PRPS1L1, UMPS</i>                                                                    |
| 24 | GO:0,006,163 Purine nucleotide metabolic process               | 18 | <i>ADA, ADAL, ADK, ADSL, ADSS1, AMPD3, ATIC, ATP5B, ATP1A1, ATP5A1W, ATP6V1A, ATP6V1B2, ATP6V1H, ENTPD1, GART, NME2, OLA1, PAICS</i>                                                                       |
| 25 | GO:0,008,135 Translation factor activity, nucleic acid binding | 16 | <i>EEF1A1, EEF1B2, EEF2, EIF1AX, EIF2S1, EIF2S2, EIF2S3, EIF3D, EIF3E, EIF3J, EIF3M, EIF4A2, EIF4E, EIF5, TCEA1, TUFM</i>                                                                                  |

|    |              |                                                              |    |                                                                                                                           |
|----|--------------|--------------------------------------------------------------|----|---------------------------------------------------------------------------------------------------------------------------|
| 26 | GO:0,003,924 | GTPase activity                                              | 16 | <i>EEF1A1, EEF2, EFL1, EIF5B, EIF2S3, RAC1, RAN, RAP1A, RAP1B, TUBA1A, TUBA3E, TUBA8B, TUBB, TUBB1, TUBB4B, TUFM</i>      |
| 27 | GO:0,009,260 | Ribonucleotide biosynthetic process                          | 16 | <i>ADA, ADAL, ADSL, AMPD3, ATIC, ATP1A1, ATP5A1W, ATP5B, ATP6V1A, ATP6V1B2, ATP6V1H, GART, NME2, PAICS, PRPS1L1, UMPS</i> |
| 28 | GO:0,016,879 | Ligase activity, forming carbon-nitrogen bonds               | 16 | <i>ADSS1, GART, GCLC, GCLM, GSS, MTHFD1, PAICS, PRPF19, UBA3, UBE2H, UBE2I, UBE2L3, UBE2N, UBE2V2, UBE2O, UBR4</i>        |
| 29 | GO:0,033,043 | Regulation of organelle organization                         | 14 | <i>ACTR3, ARPC1A, ARPC5, CAPZA1, CAPZB, DSTN, GSN, MAPRE1, NPM1, PLEK, RDX, RANBP1, SPTAN1, UBE2N</i>                     |
| 30 | GO:0,022,402 | Cell cycle process                                           | 14 | <i>BUB3, MARRE1, MYH10, NCAPD2, NPM1, PAFAH1B1, PDS5B, RANBP1, RPA1, SMC2, SMC3, SMC4, TUBB1, UBE2I</i>                   |
| 31 | GO:0,004,857 | Enzyme inhibitor activity                                    | 14 | <i>A2ML2, AGT, AMBP, ANP32E, C3, CASP3, CAST, FETUB, HSPA5, ITIH2, KNG1, OVAL, SERPINC1, SERPIND1</i>                     |
| 32 | GO:0,006,732 | Coenzyme metabolic process                                   | 13 | <i>ACO1, ALDOB, GCLC, GCLM, GSS, MDH1, MTHFD1, PGD, PGLS, SOD1, SOD2, TALDO1, TPI1</i>                                    |
| 33 | GO:0,009,611 | Response to wounding                                         | 13 | <i>C3, CASP3, ENTPD1, F13A1, FGA, FGB, FGG, FN1, PLEK, PLG, MYH10, SOD1, SOD2</i>                                         |
| 34 | GO:0,032,535 | Regulation of cellular component size                        | 12 | <i>ACTR3, ARPC1A, ARPC5, CAPZA1, CAPZB, DSTN, ENO1, GSN, NPM1, PLEK, RDX, SPTAN1</i>                                      |
| 35 | GO:0,001,701 | In utero embryonic development                               | 12 | <i>ADA, ADD1, APOB, BCL2L1, GABPA, MYH10, PITPNB, PRPF19, PSMC3, RPA1, SRSF1, YBX1</i>                                    |
| 36 | GO:0,051,258 | Protein polymerization                                       | 11 | <i>ARPC4, FGA, FGB, FGG, GSN, TUBA1A, TUBA5, TUBA8B, TUBB, TUBB1, TUBB4B</i>                                              |
| 37 | GO:0,051,301 | Cell division                                                | 11 | <i>DSTN, MARRE1, MYH9, MYH10, PAFAH1B1, PDS5B, PPP1CB, RBP4A, SMC2, TOP1, UBE2I</i>                                       |
| 38 | GO:0,006,418 | tRNA aminoacylation for protein translation                  | 10 | <i>AARS1, DARS, EPRS, FARSB, KARS, PARS, QARS, SARS1, TARS, YARS</i>                                                      |
| 39 | GO:0,006,979 | Response to oxidative stress                                 | 9  | <i>APOA4, CAT, GCLM, GPX3, GPX4, PARK7, PRDX6, SOD1, SOD2</i>                                                             |
| 40 | GO:0,070,647 | Protein modification by small protein conjugation or removal | 9  | <i>COPS5, PCNP, PRPF19, RPS27A, UBA3, UBE2H, UBE2N, UBI, USP7</i>                                                         |
| 41 | GO:0,016,209 | Antioxidant activity                                         | 8  | <i>APOA4, CAT, GPX3, GPX4, PRDX1, PRDX6, SOD1, SOD2</i>                                                                   |
| 42 | GO:0,051,188 | Cofactor biosynthetic process                                | 8  | <i>CPOX, FECH, GCLC, GCLM, GSS, MTHFD1, NFS1, UROD</i>                                                                    |
| 43 | GO:0,015,669 | Gas transport                                                | 8  | <i>CA2, HBA1, HBAD, HBBA, HBBR, HBE1, HBZ, RHAG</i>                                                                       |
| 44 | GO:0,016,860 | Intramolecular oxidoreductase activity                       | 7  | <i>GPI, HPGDS, NACA, P4HB, PDIA3, PDIA4, TPI1</i>                                                                         |

|    |                                                                        |   |                                                      |
|----|------------------------------------------------------------------------|---|------------------------------------------------------|
| 45 | GO:0,010,035 Response to inorganic substance                           | 7 | <i>APOA4, CAT, FGA, FGB, PARK7, SOD1, SOD2</i>       |
| 46 | GO:0,016,051 Carbohydrate biosynthetic process                         | 7 | <i>GAPDH, GPI, GOT1, NANS, PGD, RBP4A, TPI1</i>      |
| 47 | GO:0,019,748 Secondary metabolic process                               | 7 | <i>ADH4, ALDOB, PGD, PGLS, RBP4A, TALDO1, TPI1</i>   |
| 48 | GO:0,006,790 Sulfur metabolic process                                  | 7 | <i>CBSL, GCLC, GCLM, GSS, NFS1, SOD1, SOD2</i>       |
| 49 | GO:0,019,825 Oxygen binding                                            | 7 | <i>ALB, HBA1, HBAD, HBBA, HBBR, HBE1, HBZ</i>        |
| 50 | GO:0,050,657 Nucleic acid transport                                    | 6 | <i>EIF4A3, HNRNPA2B1, KHSRP, MAGOH, NPM1, NUP133</i> |
| 51 | GO:0,018,130 Heterocycle biosynthetic process                          | 6 | <i>ADA, ADK, CPOX, FECH, HMBS, UROD</i>              |
| 52 | GO:0,010,927 Cellular component assembly involved in morphogenesis     | 6 | <i>ACTBL2, ACTC1, ACTG1, KRT24, MYH10, PAFAH1B1</i>  |
| 53 | GO:0,016,125 Sterol metabolic process                                  | 6 | <i>APOA1, APOA4, APOB, CAT, FDPS, LCAT</i>           |
| 54 | GO:0,033,013 Tetrapyrrole metabolic process                            | 5 | <i>BLVRA, CPOX, FECH, HMBS, UROD</i>                 |
| 55 | GO:0,046,961 Proton-transporting ATPase activity, rotational mechanism | 5 | <i>ATP5B, ATP5A1W, ATP6V1A, ATPV1B2, ATP6V1H</i>     |
| 56 | GO:0,043,498 Cell surface binding                                      | 4 | <i>APOA4, FGA, FGB, HSPD1</i>                        |
| 57 | GO:0,030,261 Chromosome condensation                                   | 4 | <i>H1FO, NCAPD2, SMC2, SMC4</i>                      |
| 58 | GO:0,046,890 Regulation of lipid biosynthetic process                  | 4 | <i>APOA4, APOB, ATP1A1, SOD1</i>                     |
| 59 | GO:0,008,637 Apoptotic mitochondrial changes                           | 4 | <i>BCL2L1, BID, CASP3, SOD2</i>                      |

---
