# Supplementary material for: Proteomic Analysis of Chicken Chorioallantoic Membrane (CAM) during Embryonic Development Provides Functional Insight
Source: Hindawi journal article supplement (doi:10.1155/2022/7813921), 2022-01-01
Supplement: f9 [file 7813921.f9.pdf]

**Table S9.** Various CAM functions and the associated proteins identified in this study.

| Functions                            |                                                                                     | Involved proteins                                                                                                                                                                                                                                                                                                                                                                                                                                                                                                                                                                                                                                                                                                                                                                                                                                                                                                                                                                                                                                                                                                                                                                              | Involved cell/tissue   |
|--------------------------------------|-------------------------------------------------------------------------------------|------------------------------------------------------------------------------------------------------------------------------------------------------------------------------------------------------------------------------------------------------------------------------------------------------------------------------------------------------------------------------------------------------------------------------------------------------------------------------------------------------------------------------------------------------------------------------------------------------------------------------------------------------------------------------------------------------------------------------------------------------------------------------------------------------------------------------------------------------------------------------------------------------------------------------------------------------------------------------------------------------------------------------------------------------------------------------------------------------------------------------------------------------------------------------------------------|------------------------|
| Ca <sup>2+</sup> transport           | Calcium mobilization from ES (Acidification)                                        | <ul style="list-style-type: none"> <li>▪ Carbonic anhydrase (<i>CA2</i>, <i>CA13</i>)</li> <li>▪ Vacuolar H<sup>+</sup>-ATPase (<i>ATP6V0A4</i>, <i>ATP6V1C2</i>, <i>ATP6VOD1</i>, <i>ATP6V1E1</i>, <i>ATP6V1G1</i>, <i>LOC776719</i>)</li> <li>▪ Cell-cell junction proteins (<i>CDC42</i>, <i>ITGB3</i>, <i>LAMC1</i>, <i>THY1</i>)</li> </ul>                                                                                                                                                                                                                                                                                                                                                                                                                                                                                                                                                                                                                                                                                                                                                                                                                                               | CE, AE<br>CE, AE<br>CE |
|                                      | Intracellular Ca <sup>2+</sup> transport (Ca <sup>2+</sup> binding proteins, CaBPs) | <ul style="list-style-type: none"> <li>▪ Annexin (<i>ANXA1</i>, <i>ANXA2</i>, <i>ANXA5</i>)</li> <li>▪ Calmodulin (<i>CALML3</i>)</li> <li>▪ S100 calcium binding protein (<i>S100A11</i>, <i>S100A11</i>, <i>S100A16</i>)</li> <li>▪ Calcineurin like EF-hand protein 1 (<i>CHP1</i>)</li> <li>▪ Calcium binding protein 39 (<i>CAB39</i>)</li> </ul>                                                                                                                                                                                                                                                                                                                                                                                                                                                                                                                                                                                                                                                                                                                                                                                                                                         | CE                     |
|                                      | Intracellular Ca <sup>2+</sup> transport (ATPases)                                  | <ul style="list-style-type: none"> <li>▪ Ca<sup>2+</sup>-ATPase (<i>ATP2A2</i>) and Na<sup>+</sup>/K<sup>+</sup>-ATPase (<i>ATP1B1</i>, <i>ATP1B3</i>)</li> </ul>                                                                                                                                                                                                                                                                                                                                                                                                                                                                                                                                                                                                                                                                                                                                                                                                                                                                                                                                                                                                                              | CE                     |
| Protection against pathogen invasion | Antimicrobial activities                                                            | <ul style="list-style-type: none"> <li>▪ Cystatins (B, C, F)</li> <li>▪ SERPINs (<i>SERPINB1</i>, <i>SERPINB2</i>, <i>SERPINB5</i>, <i>SERPINB6</i>, <i>SERPINB10B</i>, <i>SERPINB14C</i>, <i>SERPINH1</i>)</li> <li>▪ Histones (H2AFY, <i>HIST1H2BO</i>, HIST1H4B, HISTH2A4L2)</li> <li>▪ SPINKs (Ovomucoid, ovoinhibitor)</li> <li>▪ BPI fold containing family B member 2 (<i>TENP</i>)</li> </ul>                                                                                                                                                                                                                                                                                                                                                                                                                                                                                                                                                                                                                                                                                                                                                                                          | CE, M, AE              |
| Vascular system                      | Diffusion                                                                           | <ul style="list-style-type: none"> <li>▪ From external air to the blood capillaries</li> </ul>                                                                                                                                                                                                                                                                                                                                                                                                                                                                                                                                                                                                                                                                                                                                                                                                                                                                                                                                                                                                                                                                                                 | ES, ESM, CE            |
|                                      | Gaseous exchange                                                                    | <ul style="list-style-type: none"> <li>▪ Annexins (A1, A2, A5, A7, A8 like)</li> <li>▪ Catenin subunits (<math>\alpha1</math>, <math>\beta1</math>)</li> <li>▪ Collagen subunits (1<math>\alpha1</math>, 1<math>\alpha2</math>, 3<math>\alpha1</math>, 4<math>\alpha1</math>, 4<math>\alpha2</math>, 5<math>\alpha2</math>, 6<math>\alpha1</math>, 6<math>\alpha2</math>, 6<math>\alpha3</math>, 7<math>\alpha1</math>, 11<math>\alpha1</math>, 12<math>\alpha1</math>, 18<math>\alpha1</math>)</li> <li>▪ Decorin</li> <li>▪ Fibulin (1,2)</li> <li>▪ Glypican 4</li> <li>▪ Integrin subunits (<math>\alpha1</math>, <math>\alpha3</math>, <math>\alpha5</math>, <math>\alpha6</math>, <math>\alpha8</math>, <math>\alpha9</math>, <math>\alpha v</math>, <math>\beta1</math>, <math>\beta3</math>, <math>\beta4</math>)</li> <li>▪ Laminin subunits (<math>\alpha1</math>, <math>\alpha5</math>, <math>\beta1</math>, <math>\beta2</math>, <math>\gamma1</math>)</li> <li>▪ Nidogen (1,2)</li> <li>▪ Tubulin subunits (<math>\beta2A</math>, <math>\beta2B</math>, <math>\beta3</math> class III, <math>\beta6</math> class V, <math>\alpha</math> like 3)</li> <li>▪ Tenascin XB</li> </ul> | M                      |
|                                      | Lymphatics                                                                          | <ul style="list-style-type: none"> <li>▪ Collagen IV subunits (<math>\alpha1</math>, <math>\alpha2</math>)</li> <li>▪ Laminin subunits (<math>\alpha1</math>, <math>\alpha5</math>, <math>\beta1</math>, <math>\beta2</math>, <math>\gamma1</math>)</li> <li>▪ Neuropilin-1 (<i>NRP1</i>)</li> <li>▪ Mitogen-activated protein kinase (MAPK3, Erk)</li> <li>▪ Nidogen (1,2)</li> <li>▪ Mannose receptor (<i>MRC1</i>, <i>MRC2</i>)</li> <li>▪ Desmoplakin (<i>DSP</i>)</li> <li>▪ PDZ and LIM domain 3 (<i>PDLIM3</i>)</li> <li>▪ TIMP metalloproteinase inhibitor 3 (<i>TIMP3</i>)</li> <li>▪ Proteasome assembly chaperone 1 (<i>PSMG1</i>)</li> <li>▪ Junction plakoglobin (<i>JUP</i>)</li> <li>▪ Integrin subunit <math>\alpha6</math> (<i>ITGA6</i>)</li> <li>▪ Myoferlin (<i>MYOF</i>)</li> <li>▪ Apolipoprotein D (<i>APOD</i>)</li> <li>▪ Collectin subfamily member 12 (<i>COLEC12</i>)</li> </ul>                                                                                                                                                                                                                                                                                   | M                      |

|                                        |                                          |                                                                                                                                                                                                                                                                        |    |
|----------------------------------------|------------------------------------------|------------------------------------------------------------------------------------------------------------------------------------------------------------------------------------------------------------------------------------------------------------------------|----|
|                                        |                                          | <ul style="list-style-type: none"> <li>▪ Galectin-1 (<i>LGALS1</i>)</li> </ul>                                                                                                                                                                                         |    |
|                                        | Blood serum                              | <ul style="list-style-type: none"> <li>▪ Hemoglobins alpha subunits (<math>\pi</math>, <math>\alpha A</math>, <math>\alpha D</math>) and <math>\beta</math> subunits (<math>\beta A</math>, <math>\beta H</math>, <math>\epsilon</math>, <math>\rho</math>)</li> </ul> | B  |
| Defense against luminal toxic contents | Glycoconjugates rich in $\alpha$ -fucose | <ul style="list-style-type: none"> <li>▪ Protein O-fucosyltransferase (POFUT1 and POFUT1)</li> <li>▪ <math>\alpha</math>-L-fucosidase 2 (FUCA2)</li> </ul>                                                                                                             | AE |
|                                        | Cell-cell junction                       | <ul style="list-style-type: none"> <li>▪ Cell division cycle 42 (CDC42)</li> <li>▪ integrin subunit <math>\beta 3</math></li> <li>▪ Laminin subunit <math>\gamma 1</math></li> <li>▪ Thy-1 cell surface antigen (THY1)</li> </ul>                                      | AE |

AE: allantoic epithelium, B: blood, CE: chorionic epithelium, ES: eggshell, ESM: eggshell membrane, M: mesodermal layer
