# Supplementary material for: Proteomic Analysis of Chicken Chorioallantoic Membrane (CAM) during Embryonic Development Provides Functional Insight
Source: Biomed Res Int. 2022 Jun 19;2022:7813921. doi: 10.1155/2022/7813921 (PMC9237712; doi:10.1155/2022/7813921)
Supplement: Supplementary 1 — Timing of chick embryo development phases and associated critical events. [file 7813921.f1.pdf]

**Table S1.** Timing of chick embryo development phases and associated critical events.

[illegible]
